# Supplementary material for: Selective photochemical synthesis of primary arylamines and symmetric diarylamines via amination of aryl bromides using Ni(NH3)6Cl2 as a nitrogen source and catalyst
Source: Royal Society of Chemistry journal article supplement (doi:10.1039/d4qo00116h), 2024-01-01

# Supporting Information

## **Selective photochemical synthesis of primary arylamines and symmetric diarylamines via amination of aryl bromides using Ni(NH<sub>3</sub>)<sub>6</sub>Cl<sub>2</sub> as a nitrogen source and catalyst**

Zhehui Xu,<sup>a</sup> Jianyang Dong,<sup>a</sup> Geyang Song,<sup>a</sup> Fuqiang Kong,<sup>a</sup> Gang Li,<sup>a</sup> Dong Xue\*<sup>a</sup>

<sup>a</sup>Key Laboratory of Applied Surface and Colloid Chemistry, Ministry of Education and School of Chemistry and Chemical Engineering, Shaanxi Normal University, Xi'an, 710062 (China).

E-mail: xuedong\_welcome@snnu.edu.cn

### Table of contents

|                                                                                                       |     |
|-------------------------------------------------------------------------------------------------------|-----|
| 1.General information.....                                                                            | S1  |
| 2.Optimization of reaction conditions .....                                                           | S2  |
| 3.General procedure for reactions .....                                                               | S9  |
| 4.Analytical data of products.....                                                                    | S13 |
| 5.References.....                                                                                     | S28 |
| 6.Copies of <sup>1</sup> H NMR, <sup>13</sup> C NMR and <sup>19</sup> F NMR spectra of products ..... | S31 |

## 1. General information

Unless otherwise specified, the chemicals were obtained commercially and used without further purification. All reactions were carried out under argon atmosphere with dry solvents under anhydrous conditions. Analytical thin-layer chromatography (TLC) was conducted with TLC plates (Silica gel 60 F254, Qingdao Haiyang) and visualization on TLC was achieved by UV light and the use of ninhydrin and iodine color developer to assist. Flash column chromatography was performed on silica gel 200-300 mesh.

$^1\text{H}$  NMR spectra,  $^{13}\text{C}\{^1\text{H}\}$  NMR spectra and  $^{19}\text{F}$  NMR spectra were recorded on a Bruker Advance 400 MHz spectrometer.  $^1\text{H}$  NMR spectra was reported in units of parts per million (ppm) relative to tetramethylsilane ( $\delta$  0 ppm),  $\text{CDCl}_3$  ( $\delta$  7.26 ppm) or  $\text{DMSO-d}_6$  ( $\delta$  2.50 ppm). Multiplicities are given as: br (broad), s (singlet), d (doublet), t (triplet), q (quartet), dd (doublets of doublet), dt (doublets of triplet) or m (multiplet).  $^{13}\text{C}\{^1\text{H}\}$  NMR spectra was reported in ppm relative to tetramethylsilane ( $\delta$  0 ppm),  $\text{CDCl}_3$  ( $\delta$  77.16 ppm) or  $\text{DMSO-d}_6$  ( $\delta$  39.52 ppm). HRMS (ESI) were performed on fourier transform ion cyclotron resonance mass spectrometer.

The purple LED lamp used in the experiments was assembled by ourselves (Figure S1). Each of lamp include: 9 W purple LED (390-395 nm, 3 LED lamp beads in series), aluminium radiator with fan, electric driver (XC-8W600-OS). The optical power up to  $200 \pm 10$  mw at 1 cm axis distance detected by Thorlabs' Optical Power Meter (PM100D, S120VC). The LED beads were purchased from Zhuhai UV Optoelectronics Co., Ltd. (THUV395T3WL-3535-60).

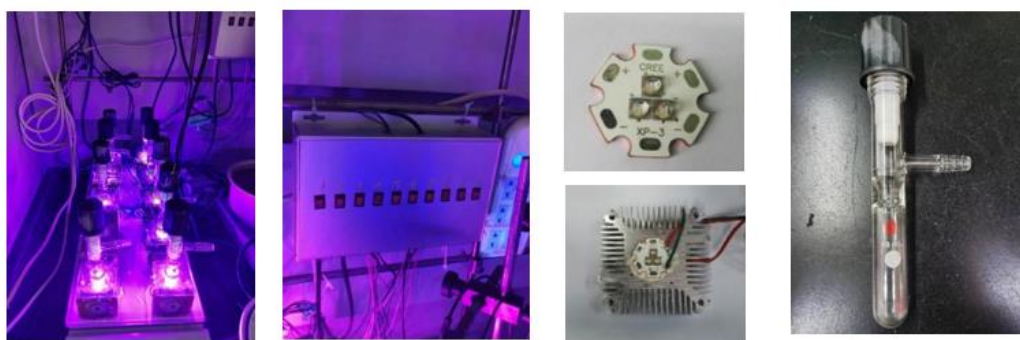

**Figure S1.** Pictures of photo device and reaction tube

## 2. Optimization of reaction conditions

### 2.1 The reaction conditions for preparation of primary arylamines

**Table S1.** The screening of solvents

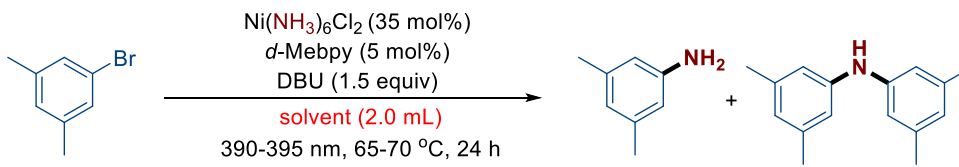

| entry | solvent (2.0 mL)   | diarylamine | arylamine |
|-------|--------------------|-------------|-----------|
| 1     | DMSO               | 13%         | 59%       |
| 2     | DMF                | 16%         | 51%       |
| 3     | DMAc               | 13%         | 42%       |
| 4     | THF                | N.D.        | trace     |
| 5     | 1,4-Dioxane        | N.D.        | N.D.      |
| 6     | CH <sub>3</sub> CN | N.D.        | 7%        |
| 7     | 2-MeTHF            | N.D.        | N.D.      |
| 8     | DMSO:THF=5:1       | 5%          | 35%       |
| 9     | DMAC:THF=9:1       | 5%          | 16%       |

Reaction conditions: aryl bromide (0.2 mmol), Ni(NH<sub>3</sub>)<sub>6</sub>Cl<sub>2</sub> (35 mol%), *d*-Mebpy (5 mol%), DBU (1.5 equiv), solvent (2.0 mL), purple LEDs (390-395 nm), 65-70 °C, Ar, 24 h. Yields determined by <sup>1</sup>H NMR using 1,3-benzodioxole as an internal standard.

**Table S2.** The screening of bases

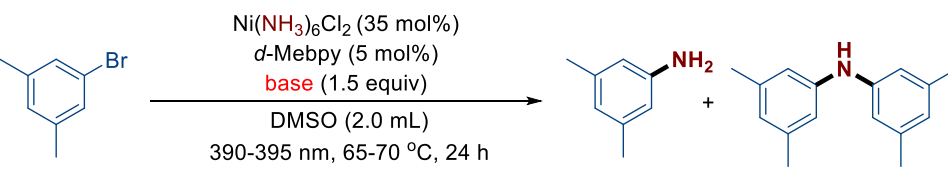

| entry | base (1.5 equiv)  | diarylamine | arylamine |
|-------|-------------------|-------------|-----------|
| 1     | DBU               | 13%         | 59%       |
| 2     | DBN               | 7%          | 31%       |
| 3     | TBD               | 23%         | 40%       |
| 4     | MTBD              | trace       | 98%       |
| 5     | DMTHPM            | 18%         | 61%       |
| 6     | DABCO             | 5%          | trace     |
| 7     | TMG               | 6%          | 41%       |
| 8     | <i>t</i> -BuTMG   | trace       | 86%       |
| 9     | DIPEA             | trace       | N.D.      |
| 10    | Et <sub>3</sub> N | 5%          | trace     |

Reaction conditions: aryl bromide (0.2 mmol), Ni(NH<sub>3</sub>)<sub>6</sub>Cl<sub>2</sub> (35 mol%), *d*-Mebpy (5 mol%), base (1.5 equiv), DMSO (2.0 mL), purple LEDs (390-395 nm), 65-70 °C, Ar, 24 h. Yields determined by <sup>1</sup>H NMR using 1,3-benzodioxole as an internal standard.

**Table S3.** The screening of ligands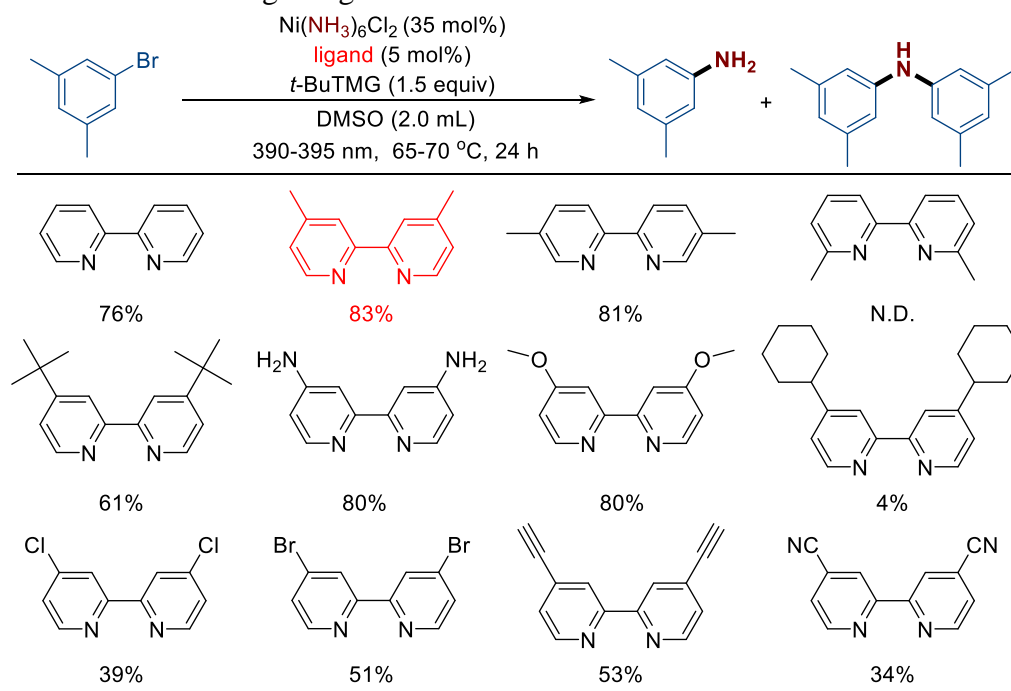

Reaction conditions: aryl bromide (0.2 mmol), Ni(NH<sub>3</sub>)<sub>6</sub>Cl<sub>2</sub> (35 mol%), ligand (5 mol%), *t*-BuTMG (1.5 equiv), DMSO (2.0 mL), purple LEDs (390-395 nm), 65-70 °C, Ar, 24 h. The yields of arylamines were determined by <sup>1</sup>H NMR using 1,3-benzodioxole as an internal standard.

**Table S4.** The screening of the amount of DMSO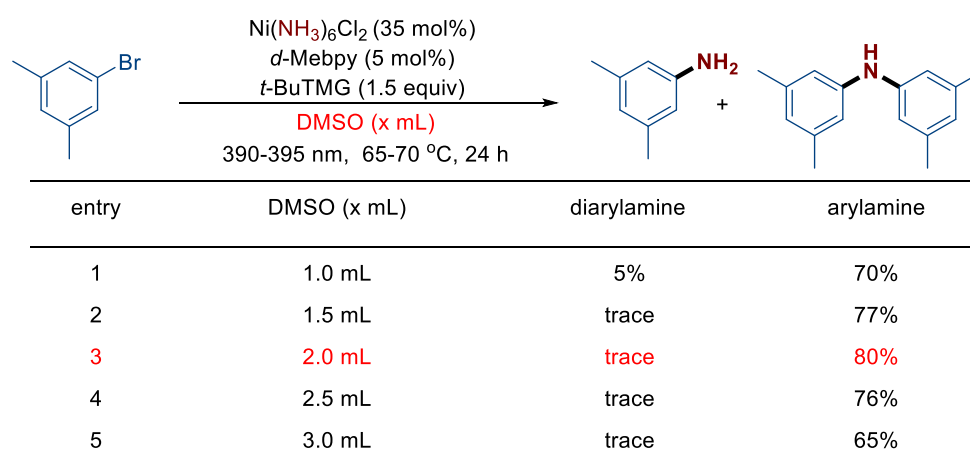

Reaction conditions: aryl bromide (0.2 mmol), Ni(NH<sub>3</sub>)<sub>6</sub>Cl<sub>2</sub> (35 mol%), *d*-Mebpy (5 mol%), *t*-BuTMG (1.5 equiv), DMSO (x mL), purple LEDs (390-395 nm), 65-70 °C, Ar, 24 h. Yields determined by <sup>1</sup>H NMR using 1,3-benzodioxole as an internal standard.

**Table S5.** The screening of  $\text{Ni}(\text{NH}_3)_6\text{X}_2$  (x mol%)
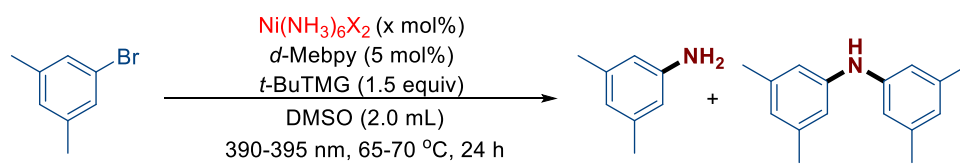

| entry | $[\text{Ni}]\text{-NH}_3$ (x mol%)              | diarylamine | arylamine |
|-------|-------------------------------------------------|-------------|-----------|
| 1     | $\text{Ni}(\text{NH}_3)_6\text{Br}_2$ (35 mol%) | 5%          | 62%       |
| 2     | $\text{Ni}(\text{NH}_3)_6\text{I}_2$ (35 mol%)  | trace       | 40%       |
| 3     | $\text{Ni}(\text{NH}_3)_6\text{Cl}_2$ (17 mol%) | trace       | 75%       |
| 4     | $\text{Ni}(\text{NH}_3)_6\text{Cl}_2$ (20 mol%) | trace       | 74%       |
| 5     | $\text{Ni}(\text{NH}_3)_6\text{Cl}_2$ (25 mol%) | trace       | 79%       |
| 6     | $\text{Ni}(\text{NH}_3)_6\text{Cl}_2$ (30 mol%) | trace       | 79%       |
| 7     | $\text{Ni}(\text{NH}_3)_6\text{Cl}_2$ (35 mol%) | trace       | 83%       |
| 8     | $\text{Ni}(\text{NH}_3)_6\text{Cl}_2$ (40 mol%) | trace       | 80%       |

Reaction conditions: aryl bromide (0.2 mmol),  $\text{Ni}(\text{NH}_3)_6\text{X}_2$  (x mol%), *d*-Mebpy (5 mol%), *t*-BuTMG (1.5 equiv), DMSO (x mL), purple LEDs (390-395 nm), 65-70 °C, Ar, 24 h. Yields determined by  $^1\text{H}$  NMR using 1,3-benzodioxole as an internal standard.

**Table S6.** Control experiments
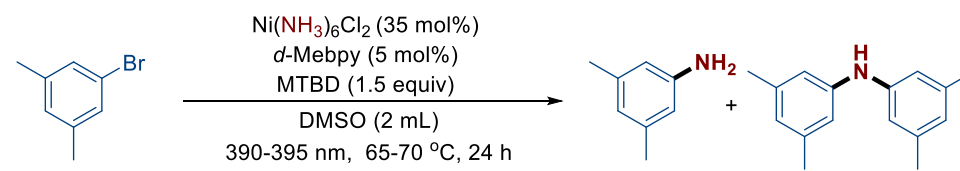

| entry | reaction conditions                      | diarylamine | arylamine |
|-------|------------------------------------------|-------------|-----------|
| 1     | Standard conditions                      | trace       | 98%       |
| 2     | No $\text{Ni}(\text{NH}_3)_6\text{Cl}_2$ | N.D.        | N.D.      |
| 3     | No ligand                                | N.D.        | 11%       |
| 4     | No base                                  | N.D.        | N.D.      |
| 5     | No light, 70 °C                          | N.D.        | N.D.      |
| 6     | Air instead of Ar                        | N.D.        | 31%       |

Reaction conditions: aryl bromide (0.2 mmol),  $\text{Ni}(\text{NH}_3)_6\text{Cl}_2$  (35 mol%), *d*-Mebpy (5 mol%), MTBD (1.5 equiv), DMSO (2.0 mL), purple LEDs (390-395 nm), 65-70 °C, Ar, 24 h. Yields determined by  $^1\text{H}$  NMR using 1,3-benzodioxole as an internal standard.

## 2.2 The reaction conditions for preparation of symmetric diarylamines

**Table S7.** The screening of photosensitizers

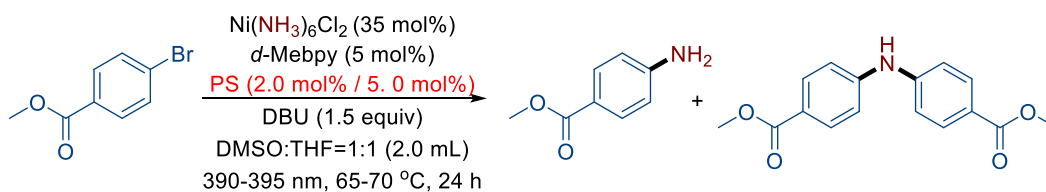

| entry | PS (2.0 mol%)                                                                                  | diarylamine | arylamine |
|-------|------------------------------------------------------------------------------------------------|-------------|-----------|
| 1     | —                                                                                              | 10%         | 48%       |
| 2     | BP (5.0 mol%)                                                                                  | 23%         | 49%       |
| 3     | [Ir(dtbbpy)(ppy) <sub>2</sub> ][PF <sub>6</sub> ] (2.0 mol%)                                   | 45%         | 45%       |
| 4     | [Ir(dF(CF <sub>3</sub> ) <sub>2</sub> ppy) <sub>2</sub> (dtbbpy)][PF <sub>6</sub> ] (2.0 mol%) | 22%         | 8%        |
| 5     | Ru(2,2'-bpy) <sub>3</sub> Cl <sub>2</sub> ·6H <sub>2</sub> O (2.0 mol%)                        | 10%         | 36%       |

Reaction conditions: aryl bromide (0.2 mmol), Ni(NH<sub>3</sub>)<sub>6</sub>Cl<sub>2</sub> (35 mol%), *d*-Mebpy (5 mol%), PS (2.0 mol% / 5.0 mol%), DBU (1.5 equiv), DMSO:THF=1:1 (2.0 mL), purple LEDs (390-395 nm), 65-70 °C, Ar, 24 h. Yields determined by <sup>1</sup>H NMR using 1,3,5-trimethoxybenzene as an internal standard.

**Table S8.** The screening of bases

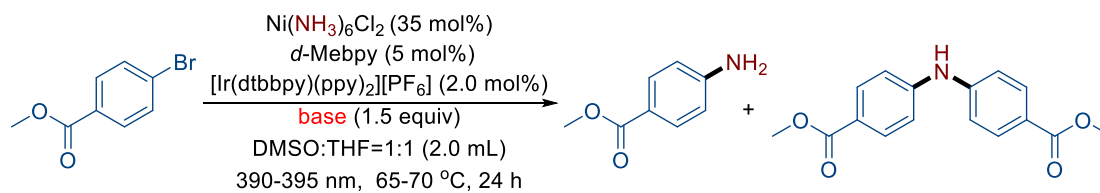

| entry | base (1.5 equiv)  | diarylamine | arylamine |
|-------|-------------------|-------------|-----------|
| 1     | DBU               | 46%         | 45%       |
| 2     | DBN               | 42%         | 24%       |
| 3     | TBD               | trace       | 14%       |
| 4     | MTBD              | 5%          | 6%        |
| 5     | DMTHPM            | 31%         | 46%       |
| 6     | DABCO             | trace       | 6%        |
| 7     | TMG               | 29%         | 30%       |
| 8     | <i>t</i> -BuTMG   | 38%         | 58%       |
| 9     | DIPEA             | trace       | trace     |
| 10    | DIPA              | 31%         | 12%       |
| 11    | Et <sub>3</sub> N | trace       | 7%        |

Reaction conditions: aryl bromide (0.2 mmol), Ni(NH<sub>3</sub>)<sub>6</sub>Cl<sub>2</sub> (35 mol%), *d*-Mebpy (5 mol%), [Ir(dtbbpy)(ppy)<sub>2</sub>][PF<sub>6</sub>] (2.0 mol%), base (1.5 equiv), DMSO:THF=1:1 (2.0 mL), purple LEDs (390-395 nm), 65-70 °C, Ar, 24 h. Yields determined by <sup>1</sup>H NMR using 1,3,5-trimethoxybenzene as an internal standard.

**Table S9.** The screening of solvents, light sources and additives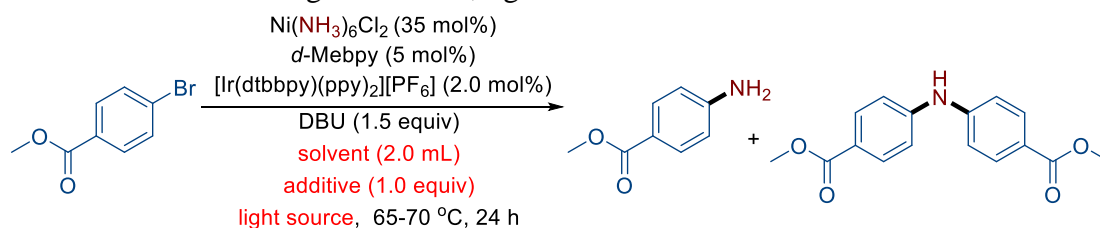

| entry | solvent (2.0 mL)   | light source | additive (1.0 equiv) | diarylamine | arylamine |
|-------|--------------------|--------------|----------------------|-------------|-----------|
| 1     | DMSO:THF=1:1       | 390-395 nm   | —                    | 45%         | 45%       |
| 2     | THF                | 390-395 nm   | —                    | 20%         | trace     |
| 3     | 1,4-Dioxane        | 390-395 nm   | —                    | 23%         | trace     |
| 4     | CH <sub>3</sub> CN | 390-395 nm   | —                    | 21%         | 60%       |
| 5     | 2-MeTHF            | 390-395 nm   | —                    | 17%         | 8%        |
| 6     | Toulene            | 390-395 nm   | —                    | 15%         | trace     |
| 7     | DMSO               | 390-395 nm   | —                    | 46%         | 46%       |
| 8     | DMAc               | 390-395 nm   | —                    | 45%         | 18%       |
| 9     | DMF                | 390-395 nm   | —                    | 50%         | 17%       |
| 10    | DMF                | 365-370 nm   | —                    | 21%         | 35%       |
| 11    | DMF                | 460-465 nm   | —                    | 35%         | 45%       |
| 12    | DMF                | 490-495 nm   | —                    | 32%         | 57%       |
| 13    | DMF                | 520-530 nm   | —                    | 26%         | 54%       |
| 14    | DMF                | 390-395 nm   | TBAC                 | 32%         | 29%       |
| 15    | DMF                | 390-395 nm   | TBAB                 | 39%         | 18%       |
| 16    | DMF                | 390-395 nm   | TBAI                 | 9%          | 63%       |
| 17    | DMF                | 390-395 nm   | NaCl                 | 44%         | 24%       |
| 18    | DMF                | 390-395 nm   | NaBr                 | 38%         | 27%       |
| 19    | DMF                | 390-395 nm   | KBr                  | 45%         | 27%       |
| 20    | DMF                | 390-395 nm   | KI                   | 8%          | 74%       |

Reaction conditions: aryl bromide (0.2 mmol),  $\text{Ni}(\text{NH}_3)_6\text{Cl}_2$  (35 mol%), *d*-Mebpy (5 mol%),  $[\text{Ir}(\text{dtbbpy})(\text{ppy})_2][\text{PF}_6]$  (2.0 mol%), DBU (1.5 equiv), additive (1.0 equiv), solvent (2.0 mL), light source, 65-70 °C, Ar, 24 h. Yields determined by <sup>1</sup>H NMR using 1,3,5-trimethoxybenzene as an internal standard.

**Table S10.** The screening of the amount of DBU, DMSO and  $[\text{Ir}(\text{dtbbpy})(\text{ppy})_2][\text{PF}_6]$ 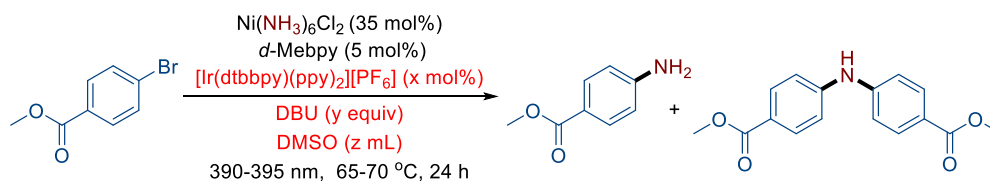

| entry | DBU ( <i>y</i> equiv) | DMSO ( <i>z</i> mL) | [Ir] ( <i>x</i> mol%) | diarylamine | arylamine |
|-------|-----------------------|---------------------|-----------------------|-------------|-----------|
| 1     | 0.5                   | 2.0 mL              | 2.0 mol%              | 32%         | 11%       |
| 2     | 1.0                   | 2.0 mL              | 2.0 mol%              | 61%         | 21%       |
| 3     | 1.5                   | 2.0 mL              | 2.0 mol%              | 47%         | 38%       |
| 4     | 2.0                   | 2.0 mL              | 2.0 mol%              | 48%         | 39%       |
| 5     | 2.5                   | 2.0 mL              | 2.0 mol%              | 42%         | 46%       |
| 6     | 3.0                   | 2.0 mL              | 2.0 mol%              | 39%         | 48%       |
| 7     | 3.5                   | 2.0 mL              | 2.0 mol%              | 36%         | 51%       |
| 8     | 1.0                   | 1.0 mL              | 2.0 mol%              | 63%         | 11%       |
| 9     | 1.0                   | 1.5 mL              | 2.0 mol%              | 59%         | 17%       |
| 10    | 1.0                   | 2.5 mL              | 2.0 mol%              | 55%         | 17%       |
| 11    | 1.0                   | 3.0 mL              | 2.0 mol%              | 54%         | 20%       |
| 12    | 1.0                   | 1.0 mL              | 0.5 mol%              | 36%         | 39%       |
| 13    | 1.0                   | 1.0 mL              | 1.0 mol%              | 50%         | 32%       |
| 14    | 1.0                   | 1.0 mL              | 1.5 mol%              | 61%         | 17%       |
| 15    | 1.0                   | 1.0 mL              | 2.5 mol%              | 65%         | 24%       |
| 16    | 1.0                   | 1.0 mL              | 3.0 mol%              | 65%         | 25%       |
| 17    | 1.0                   | 1.0 mL              | 3.5 mol%              | 72%         | 15%       |
| 18    | 1.0                   | 1.0 mL              | 4.0 mol%              | 69%         | 15%       |

Reaction conditions: aryl bromide (0.2 mmol),  $\text{Ni}(\text{NH}_3)_6\text{Cl}_2$  (35 mol%), *d*-Mebpy (5 mol%),  $[\text{Ir}(\text{dtbbpy})(\text{ppy})_2][\text{PF}_6]$  (*x* mol%), DBU (*y* equiv), DMSO (*z* mL), purple LEDs (390-395 nm), 65-70 °C, Ar, 24 h. Yields determined by  $^1\text{H}$  NMR using 1,3,5-trimethoxybenzene as an internal standard.

**Table S11.** The screening of  $\text{Ni}(\text{NH}_3)_6\text{X}_2$ 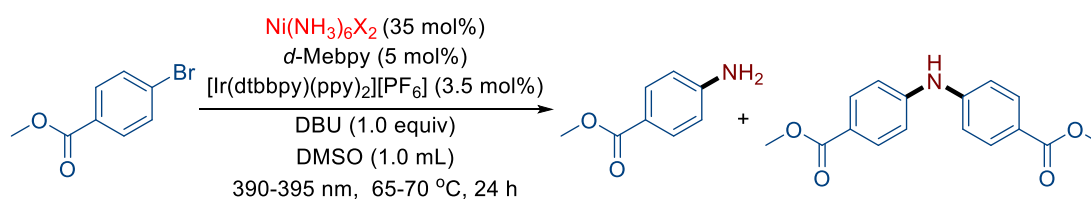

| entry | $[\text{Ni}]-\text{NH}_3$ (35 mol%)   | diarylamine | arylamine |
|-------|---------------------------------------|-------------|-----------|
| 1     | $\text{Ni}(\text{NH}_3)_6\text{Cl}_2$ | 73%         | 15%       |
| 2     | $\text{Ni}(\text{NH}_3)_6\text{Br}_2$ | 61%         | 8%        |
| 3     | $\text{Ni}(\text{NH}_3)_6\text{I}_2$  | 8%          | 79%       |

Reaction conditions: aryl bromide (0.2 mmol),  $\text{Ni}(\text{NH}_3)_6\text{X}_2$  (35 mol%), *d*-Mebpy (5 mol%),  $[\text{Ir}(\text{dtbbpy})(\text{ppy})_2][\text{PF}_6]$  (3.5 mol%), DBU (1.0 equiv), DMSO (1.0 mL), purple LEDs (390-395 nm), 65-70 °C, Ar, 24 h. Yields determined by  $^1\text{H}$  NMR using 1,3,5-trimethoxybenzene as an internal standard.



**Table S12.** The screening of ligands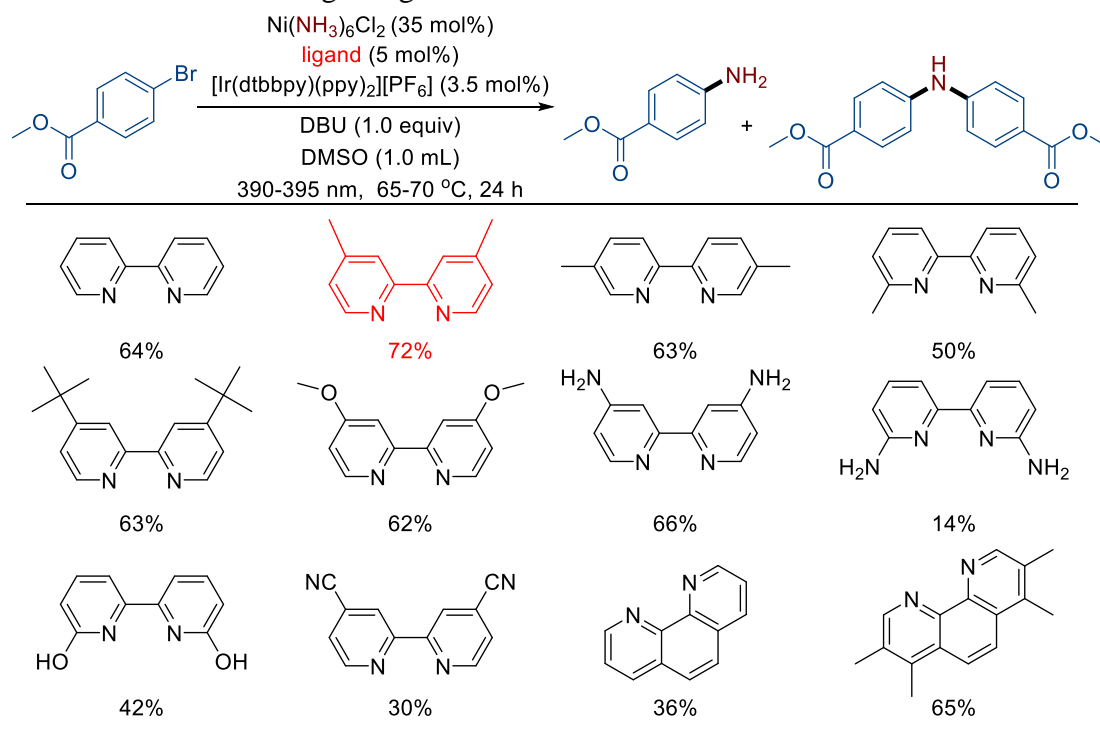

Reaction conditions: aryl bromide (0.2 mmol),  $\text{Ni}(\text{NH}_3)_6\text{Cl}_2$  (35 mol%), ligand (5 mol%),  $[\text{Ir}(\text{dtbbpy})(\text{ppy})_2][\text{PF}_6]$  (3.5 mol%), DBU (1.0 equiv), DMSO (1.0 mL), purple LEDs (390-395 nm), 65-70 °C, Ar, 24 h. The yields of diarylamines were determined by  $^1\text{H}$  NMR using 1,3,5-trimethoxybenzene as an internal standard.

**Table S13.** Control experiments

$\text{Ni}(\text{NH}_3)_6\text{Cl}_2$  (35 mol%)  
 $d$ -Mebpy (5 mol%)  
 $[\text{Ir}(\text{dtbbpy})(\text{ppy})_2][\text{PF}_6]$  (3.5 mol%)  
 DBU (1.0 equiv)  
 DMSO (1.0 mL)  
 390-395 nm, 65-70 °C, 24 h

| entry | reaction conditions                      | diarylamine | arylamine |
|-------|------------------------------------------|-------------|-----------|
| 1     | Standard conditions                      | 72%         | 15%       |
| 2     | No $\text{Ni}(\text{NH}_3)_6\text{Cl}_2$ | N.D.        | N.D.      |
| 3     | No dmebpy                                | 58%         | 25%       |
| 4     | No [Ir]                                  | 11%         | 47%       |
| 5     | No DBU                                   | N.D.        | trace     |
| 6     | No light, 70 °C                          | N.D.        | N.D.      |
| 7     | Air instead of Ar                        | 33%         | 33%       |
| 8     | 390-395 nm, R.T.                         | 19%         | 4%        |

Reaction conditions: aryl bromide (0.2 mmol),  $\text{Ni}(\text{NH}_3)_6\text{Cl}_2$  (35 mol%),  $d$ -Mebpy (5 mol%),  $[\text{Ir}(\text{dtbbpy})(\text{ppy})_2][\text{PF}_6]$  (3.5 mol%), DBU (1.0 equiv), DMSO (1.0 mL), purple LEDs (390-395 nm), 65-70 °C, Ar, 24 h. Yields determined by  $^1\text{H}$  NMR using 1,3,5-trimethoxybenzene as an internal standard.

### 3. General procedure for reactions

#### 3.1 Synthesis of $[(\text{NH}_3)_6\text{Ni}]\text{X}_2$ <sup>[2]</sup>

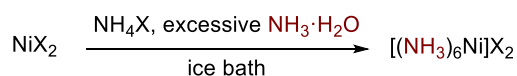

In an ice bath, a magnetic stir bar,  $\text{NiX}_2$ ,  $\text{NH}_4\text{X}$  and excessive ammonia water, were placed into an oven-dried 25 mL dried round-bottomed flask. The reaction mixture for 2-12 h when the reaction is completed. The resulting purplish solution was rinsed with ammonia water and ethanol. The precipitate was filter collected on a frit, rinsed with ethanol and residual solvent was removed under vacuum to give the compound. The compound was used without further purification.

#### 3.2 Standard procedure for exploration of the scope of arylamines

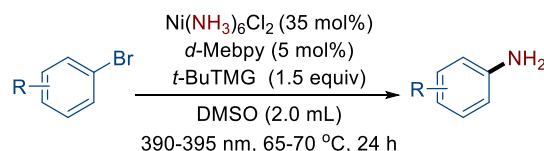

To an oven-dried 10 mL of storage tube were added solid aryl bromides (0.2 mmol) (liquid aryl bromides were added via syringe after purged and evacuated),  $\text{Ni}(\text{NH}_3)_6\text{Cl}_2$  (35 mol%), *d*-Mebpy (4,4'-dimethyl-2,2'-bipyridine) (5 mol%) and a magnetic stir bar under argon atmosphere. The mixture was evacuated and backfilled with argon for at least three times. Then *t*-BuTMG (1.5 equiv) or MTBD (1.5 equiv) and DMSO (2.0 mL) were added. The tube was sealed with a Teflon screw valve. The reaction mixture was then irradiated with 9 W purple LEDs (390-395 nm, 1 cm away from the tube, optical power:  $200 \pm 10 \text{ mw/cm}^2$ ) at 65-70 °C for 24 hours. After the reaction was completed, the mixture was diluted with ethyl acetate after cooling to room temperature. The organic phases were washed with saturated brine or saturated  $\text{NH}_4\text{Cl}$  ( $3 \times 10 \text{ mL}$ ), dried over anhydrous sodium sulfate, and concentrated under reduced pressure. The crude product was then purified by column chromatography on silica gel to give the desired product.

#### 3.3 Standard procedure for exploration of the scope of symmetric diarylamines

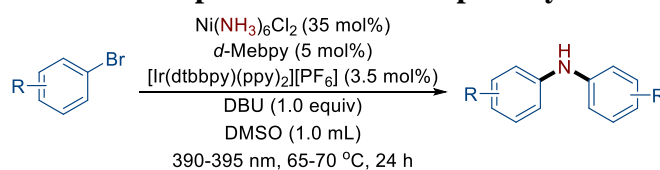

To an oven-dried 10 mL of storage tube were added solid aryl bromides (0.2 mmol) (liquid aryl bromides were added via syringe after purged and evacuated), Ni(NH<sub>3</sub>)<sub>6</sub>Cl<sub>2</sub> (35 mol%), *d*-Mebpy (4,4'-dimethyl-2,2'-bipyridine) (5 mol%), [Ir(dtbbpy)(ppy)<sub>2</sub>][PF<sub>6</sub>] (3.5 mol%) and a magnetic stir bar under argon atmosphere. The mixture was evacuated and backfilled with argon for at least three times. Then DBU (1.0 equiv) and DMSO (1.0 mL) were added. The tube was sealed with a Teflon screw valve. The reaction mixture was then irradiated with 9 W purple LEDs (390-395 nm, 1 cm away from the tube, optical power: 200 ± 10 mw/cm<sup>2</sup>) at 65-70 °C for 24 hours. After the reaction was completed, the mixture was diluted with ethyl acetate after cooling to room temperature. The organic phases were washed with saturated brine or saturated NH<sub>4</sub>Cl (3×10 mL), dried over anhydrous sodium sulfate, and concentrated under reduced pressure. The crude product was then purified by column chromatography on silica gel to give the desired product.

### 3.4 Preparation of benzocaine at gram scale

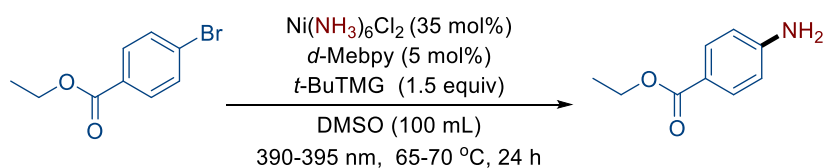

To an oven-dried 200 mL of storage tube were added Ni(NH<sub>3</sub>)<sub>6</sub>Cl<sub>2</sub> (35 mol%), *d*-Mebpy (4,4'-dimethyl-2,2'-bipyridine) (5 mol%) and a magnetic stir bar under argon atmosphere. The mixture was evacuated and backfilled with argon for at least three times. Then ethyl 4-bromobenzoate (10 mmol), *t*-BuTMG (1.5 equiv) and DMSO (100 mL) were added. The tube was sealed with a Teflon screw valve. The reaction mixture was then irradiated with purple LEDs (390-395 nm, 1 cm away from the tube) at 65-70 °C for 24 hours. After the reaction was completed, the mixture was diluted with ethyl acetate after cooling to room temperature. The organic phases were washed with saturated brine or saturated NH<sub>4</sub>Cl, dried over anhydrous sodium sulfate, and concentrated under reduced pressure. The crude product was then purified by column chromatography on silica gel to give the desired product.

### 3.5 Preparation of antioxidant at gram scale

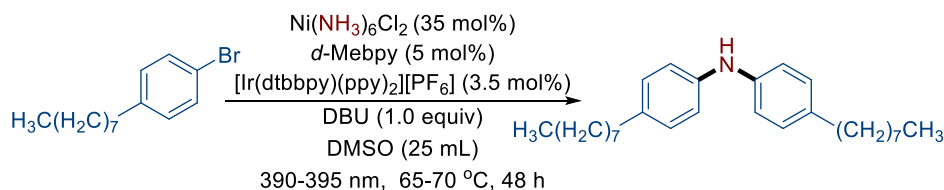

To an oven-dried 100 mL of storage tube were added  $\text{Ni}(\text{NH}_3)_6\text{Cl}_2$  (35 mol%),  $d$ -Mebpy (4,4'-dimethyl-2,2'-bipyridine) (5 mol%),  $[\text{Ir}(\text{dtbbpy})(\text{ppy})_2][\text{PF}_6]$  (3.5 mol%) and a magnetic stir bar under argon atmosphere. The mixture was evacuated and backfilled with argon for at least three times. Then 1-bromo-4-octylbenzene (5 mmol), DBU (1.0 equiv) and DMSO (25 mL) were added. The tube was sealed with a Teflon screw valve. The reaction mixture was then irradiated with purple LEDs (390-395 nm, 1 cm away from the tube) at 65-70 °C for 48 hours. After the reaction was completed, the mixture was diluted with ethyl acetate after cooling to room temperature. The organic phases were washed with saturated brine or saturated  $\text{NH}_4\text{Cl}$ , dried over anhydrous sodium sulfate, and concentrated under reduced pressure. The crude product was then purified by column chromatography on silica gel to give the desired product.

### 3.6 Preparation of bis(4-methoxyphenyl)amine

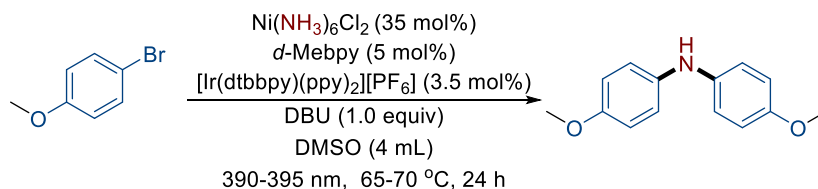

To an oven-dried 10 mL of storage tube were added  $\text{Ni}(\text{NH}_3)_6\text{Cl}_2$  (35 mol%),  $d$ -Mebpy (4,4'-dimethyl-2,2'-bipyridine) (5 mol%),  $[\text{Ir}(\text{dtbbpy})(\text{ppy})_2][\text{PF}_6]$  (3.5 mol%) and a magnetic stir bar under argon atmosphere. The mixture was evacuated and backfilled with argon for at least three times. Then 4-bromoanisole (2 mmol), DBU (1.0 equiv) and DMSO (4 mL) were added. The tube was sealed with a Teflon screw valve. The reaction mixture was then irradiated with purple LEDs (390-395 nm, 1 cm away from the tube) at 65-70 °C for 24 hours. After the reaction was completed, the mixture was diluted with ethyl acetate after cooling to room temperature. The organic phases were washed with saturated brine or saturated  $\text{NH}_4\text{Cl}$ , dried over anhydrous sodium sulfate, and concentrated under reduced pressure. The crude product was then purified by column chromatography on silica gel to give the desired product.

### 3.7 Preparation of organic hole-transporting material Spiro-OMeTAD

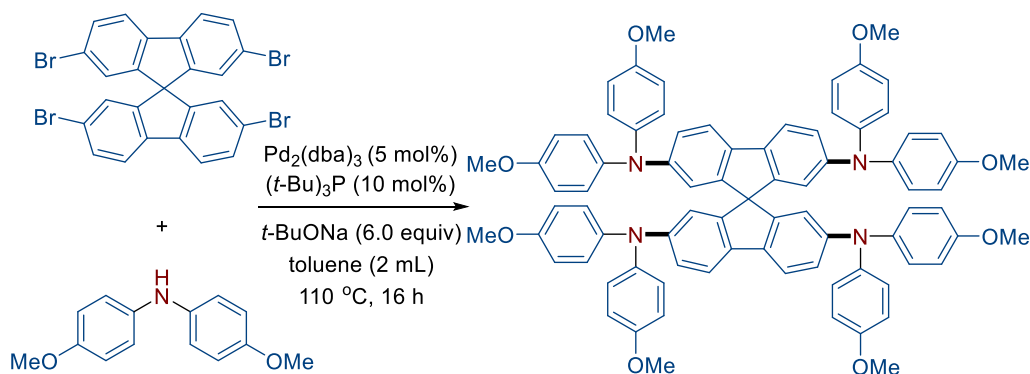

According to literature, Spiro-OMeTAD was synthesized.<sup>[22]</sup> To an oven-dried 10 mL of storage tube were added 2,2',7,7'-tetrabromo-9,9'-spirobi[9H-fluorene] (0.2 mmol), 4,4'-dimethoxydiphenylamine (0.9 mmol), sodium tert-butoxide (6.0 equiv), tris(dibenzylideneacetone)dipalladium(0) (5 mol%), tri-tert-butylphosphine (10 mol%) and a magnetic stir bar under argon atmosphere. The mixture was evacuated and backfilled with argon for at least three times. Then toluene (2 mL) was added. The tube was sealed with a Teflon screw valve. The reaction mixture was heated at 110 °C for 16 h. After the reaction was completed, the mixture was diluted with ethyl acetate after cooling to room temperature. The organic phases were washed with saturated brine, dried over anhydrous sodium sulfate, and concentrated under reduced pressure. The crude product was then purified by column chromatography on silica gel to give the desired product.

### 4. Analytical data of products

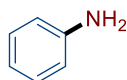

**Aniline (4):** light yellow oil; <sup>1</sup>H NMR (400 MHz, CDCl<sub>3</sub>) δ 7.19 (t, *J* = 7.6 Hz, 2H), 6.79 (t, *J* = 7.6 Hz, 1H), 6.71 (d, *J* = 8.0 Hz, 2H), 3.61 (br, 2H). <sup>13</sup>C{<sup>1</sup>H} NMR (100 MHz, CDCl<sub>3</sub>) δ 146.5, 129.4, 118.6, 115.2. Spectral datas obtained for the compound are in good agreement with the reported datas.<sup>[1]</sup>

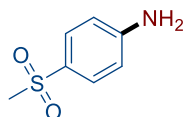

**4-(Methylsulfonyl)aniline (5):** yellow solid; <sup>1</sup>H NMR (400 MHz, CDCl<sub>3</sub>) δ 7.67 (d, *J* = 8.7 Hz, 2H), 6.70 (d, *J* = 8.7 Hz, 2H), 4.24 (br, 2H), 2.99 (s, 3H). <sup>13</sup>C{<sup>1</sup>H} NMR (100 MHz, CDCl<sub>3</sub>) δ 151.5, 129.6, 128.9, 114.2, 45.1. Spectral datas obtained for the compound are in good agreement with the reported datas.<sup>[2]</sup>

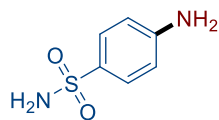

**4-Aminobenzenesulfonamide (6):** yellow solid;  $^1\text{H}$  NMR (400 MHz,  $\text{DMSO-}d_6$ )  $\delta$  7.50 (d,  $J = 8.7$  Hz, 2H), 6.93 (s, 2H), 6.64 (d,  $J = 8.7$  Hz, 2H), 5.82 (s, 2H).  $^{13}\text{C}\{^1\text{H}\}$  NMR (100 MHz,  $\text{DMSO-}d_6$ )  $\delta$  151.9, 130.1, 127.5, 112.5. Spectral datas obtained for the compound are in good agreement with the reported datas.<sup>[3]</sup>

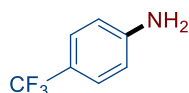

**4-(Trifluoromethyl)aniline (7):** light yellow solid;  $^1\text{H}$  NMR (400 MHz,  $\text{CDCl}_3$ )  $\delta$  7.40 (d,  $J = 8.3$  Hz, 1H), 6.69 (d,  $J = 8.3$  Hz, 1H), 3.94 (br, 1H).  $^{13}\text{C}\{^1\text{H}\}$  NMR (100 MHz,  $\text{CDCl}_3$ )  $\delta$  149.5, 126.8 (q,  $J = 4.0$  Hz), 125.0 (q,  $J = 269.0$  Hz), 120.3 (q,  $J = 32.0$  Hz), 114.3.  $^{19}\text{F}$  NMR (376 MHz,  $\text{CDCl}_3$ )  $\delta$  -61.25. Spectral datas obtained for the compound are in good agreement with the reported datas.<sup>[2]</sup>

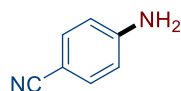

**4-Aminobenzonitrile (8):** white solid;  $^1\text{H}$  NMR (400 MHz,  $\text{CDCl}_3$ )  $\delta$  7.40 (d,  $J = 8.4$  Hz, 2H), 6.64 (d,  $J = 8.4$  Hz, 2H), 4.17 (br, 2H).  $^{13}\text{C}\{^1\text{H}\}$  NMR (100 MHz,  $\text{CDCl}_3$ )  $\delta$  150.6, 133.9, 120.3, 114.5, 100.2. Spectral datas obtained for the compound are in good agreement with the reported datas.<sup>[2]</sup>

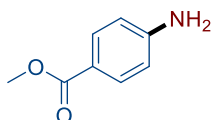

**Methyl 4-aminobenzoate (9):** white solid;  $^1\text{H}$  NMR (400 MHz,  $\text{CDCl}_3$ )  $\delta$  7.85 (d,  $J = 8.7$  Hz, 2H), 6.63 (d,  $J = 8.7$  Hz, 2H), 4.08 (br, 2H), 3.85 (s, 3H).  $^{13}\text{C}\{^1\text{H}\}$  NMR (100 MHz,  $\text{CDCl}_3$ )  $\delta$  167.3, 150.9, 131.7, 119.9, 113.9, 51.7. Spectral datas obtained for the compound are in good agreement with the reported datas.<sup>[2]</sup>

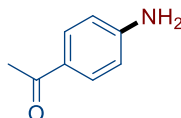

**1-(4-Aminophenyl)ethan-1-one (10):** light yellow solid;  $^1\text{H}$  NMR (400 MHz,  $\text{CDCl}_3$ )  $\delta$  7.81 (d,  $J = 8.6$  Hz, 2H), 6.64 (d,  $J = 8.6$  Hz, 2H), 4.13 (br, 2H), 2.50 (s, 3H).  $^{13}\text{C}\{^1\text{H}\}$  NMR (100 MHz,  $\text{CDCl}_3$ )  $\delta$  196.6, 151.2, 130.9, 128.1, 113.9, 26.2. Spectral datas obtained for the compound are in good agreement with the reported datas.<sup>[2]</sup>

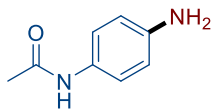

**N-(4-Aminophenyl)acetamide (11)** : yellow solid; <sup>1</sup>H NMR (400 MHz, DMSO-*d*<sub>6</sub>) δ 9.60 (s, 1H), 7.23 (d, *J* = 8.6 Hz, 2H), 6.52 (d, *J* = 8.6 Hz, 2H), 4.84 (br, 2H), 1.99 (s, 3H). <sup>13</sup>C{<sup>1</sup>H} NMR (100 MHz, DMSO-*d*<sub>6</sub>) δ 167.8, 145.0, 129.1, 121.3, 114.3, 24.1. Spectral datas obtained for the compound are in good agreement with the reported datas.<sup>[2]</sup>

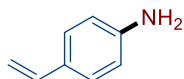

**4-Vinylaniline (12)**: yellow solid; <sup>1</sup>H NMR (400 MHz, CDCl<sub>3</sub>) δ 7.20 (d, *J* = 8.3 Hz, 2H), 6.60 (d, *J* = 8.3 Hz, 2H), 6.58 – 6.56 (m, 1H), 5.52 (d, *J* = 17.6 Hz, 1H), 5.01 (d, *J* = 10.9 Hz, 1H), 3.66 (br, 2H). <sup>13</sup>C{<sup>1</sup>H} NMR (100 MHz, CDCl<sub>3</sub>) δ 146.3, 136.7, 128.5, 127.5, 115.1, 110.1. <sup>19</sup>F NMR (376 MHz, Chloroform-*d*) δ -126.85. Spectral datas obtained for the compound are in good agreement with the reported datas.<sup>[2]</sup>

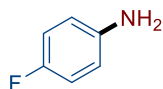

**4-Fluoroaniline (13)**: light yellow oil; <sup>1</sup>H NMR (400 MHz, CDCl<sub>3</sub>) δ 6.86 (t, *J* = 8.7 Hz, 1H), 6.63 – 6.60 (m, 1H), 3.53 (br, 1H). <sup>13</sup>C{<sup>1</sup>H} NMR (100 MHz, CDCl<sub>3</sub>) δ 156.6 (d, *J* = 235.0 Hz) 142.5, 116.2 (d, *J* = 7.0 Hz), 115.8 (d, *J* = 23.0 Hz). <sup>19</sup>F NMR (376 MHz, CDCl<sub>3</sub>) δ -126.85. Spectral datas obtained for the compound are in good agreement with the reported datas.<sup>[2]</sup>

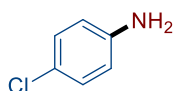

**4-Chloroaniline (14)**: light yellow solid; <sup>1</sup>H NMR (400 MHz, CDCl<sub>3</sub>) δ 7.10 (d, *J* = 8.5 Hz, 2H), 6.60 (d, *J* = 8.5 Hz, 2H), 3.63 (br, 2H). <sup>13</sup>C{<sup>1</sup>H} NMR (100 MHz, CDCl<sub>3</sub>) δ 145.1, 129.2, 123.2, 116.3. Spectral datas obtained for the compound are in good agreement with the reported datas.<sup>[2]</sup>

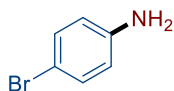

**4-Bromoaniline (15)**: yellow solid; <sup>1</sup>H NMR (400 MHz, CDCl<sub>3</sub>) δ 7.23 (d, *J* = 8.8 Hz, 2H), 6.56 (d, *J* = 8.8 Hz, 2H), 3.66 (br, 2H). <sup>13</sup>C{<sup>1</sup>H} NMR (100 MHz, CDCl<sub>3</sub>) δ 145.5, 132.1, 116.8, 110.3. Spectral datas obtained for the compound are in good agreement with the reported datas.<sup>[2]</sup>

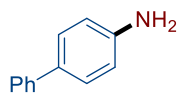

**[1,1'-Biphenyl]-4-amine (16):** white solid;  $^1\text{H}$  NMR (400 MHz,  $\text{CDCl}_3$ )  $\delta$  7.55 (d,  $J = 7.3$  Hz, 2H), 7.44 – 7.39 (m, 4H), 7.30 – 7.26 (m, 1H), 6.77 (d,  $J = 8.5$  Hz, 2H), 3.72 (br, 2H).  $^{13}\text{C}\{^1\text{H}\}$  NMR (100 MHz,  $\text{CDCl}_3$ )  $\delta$  146.0, 141.3, 131.7, 128.8, 128.2, 126.5, 126.4, 115.5. Spectral datas obtained for the compound are in good agreement with the reported datas.<sup>[2]</sup>

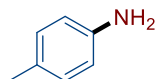

**p-Toluidine (17):** white solid;  $^1\text{H}$  NMR (400 MHz,  $\text{CDCl}_3$ )  $\delta$  6.98 (d,  $J = 7.7$  Hz, 2H), 6.62 (d,  $J = 7.7$  Hz, 2H), 3.44 (br, 2H), 2.25 (s, 3H).  $^{13}\text{C}\{^1\text{H}\}$  NMR (100 MHz,  $\text{CDCl}_3$ )  $\delta$  143.8, 129.9, 128.0, 115.4, 20.6. Spectral datas obtained for the compound are in good agreement with the reported datas.<sup>[7]</sup>

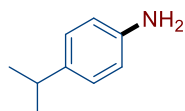

**4-Isopropylaniline (18):** light yellow oil;  $^1\text{H}$  NMR (400 MHz,  $\text{CDCl}_3$ )  $\delta$  7.06 (d,  $J = 8.2$  Hz, 2H), 6.66 (d,  $J = 8.2$  Hz, 2H), 3.47 (br, 2H), 2.85 (hept,  $J = 6.9$  Hz, 1H), 1.24 (d,  $J = 6.9$  Hz, 6H).  $^{13}\text{C}\{^1\text{H}\}$  NMR (100 MHz,  $\text{CDCl}_3$ )  $\delta$  144.3, 139.3, 127.2, 115.3, 33.3, 24.3. Spectral datas obtained for the compound are in good agreement with the reported datas.<sup>[2]</sup>

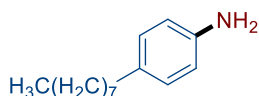

**4-Octylaniline (19):** yellow oil;  $^1\text{H}$  NMR (400 MHz,  $\text{CDCl}_3$ )  $\delta$  6.9 (d,  $J = 8.3$  Hz, 2H), 6.63 (d,  $J = 8.3$  Hz, 2H), 3.48 (br, 2H), 2.50 (t,  $J = 7.6$  Hz, 2H), 1.56 (p,  $J = 7.2$  Hz, 2H), 1.31 – 1.27 (m, 10H), 0.89 (t,  $J = 6.7$  Hz, 3H).  $^{13}\text{C}\{^1\text{H}\}$  NMR (100 MHz,  $\text{CDCl}_3$ )  $\delta$  144.1, 133.3, 129.3, 115.4, 35.2, 32.0, 32.0, 29.6, 29.4, 29.4, 22.8, 14.2. Spectral datas obtained for the compound are in good agreement with the reported datas.<sup>[4]</sup>

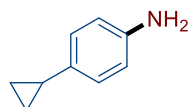

**4-Cyclopropylaniline (20):** yellow oil;  $^1\text{H}$  NMR (400 MHz,  $\text{CDCl}_3$ )  $\delta$  6.91 (d,  $J = 8.1$  Hz, 2H), 6.62 (d,  $J = 8.1$  Hz, 2H), 3.27 (br, 2H), 1.85 – 1.78 (m, 1H), 0.86 (q,  $J = 5.1$  Hz, 2H), 0.59 (q,  $J = 5.1$  Hz, 2H).  $^{13}\text{C}\{^1\text{H}\}$  NMR (100 MHz,  $\text{CDCl}_3$ )  $\delta$  144.1, 134.0, 126.9, 115.4, 14.7, 8.4. Spectral datas obtained for the compound are in good agreement



with the reported datas.<sup>[5]</sup>

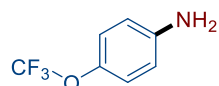

**4-(Trifluoromethoxy)aniline (21):** yellow oil; <sup>1</sup>H NMR (400 MHz, CDCl<sub>3</sub>) δ 7.01 (d, *J* = 8.8 Hz, 2H), 6.64 (d, *J* = 8.8 Hz, 2H), 3.68 (br, 2H). <sup>13</sup>C{<sup>1</sup>H} NMR (100 MHz, CDCl<sub>3</sub>) δ 145.4, 141.5, 122.5, 120.8 (d, *J* = 256.5 Hz), 115.6. <sup>19</sup>F NMR (376 MHz, CDCl<sub>3</sub>) δ -58.48. Spectral datas obtained for the compound are in good agreement with the reported datas.<sup>[2]</sup>

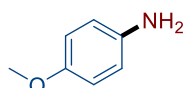

**4-Methoxyaniline (22):** black solid; <sup>1</sup>H NMR (400 MHz, CDCl<sub>3</sub>) δ 6.75 (d, *J* = 8.8 Hz, 2H), 6.65 (d, *J* = 8.8 Hz, 2H), 3.75 (s, 3H), 3.32 (br, 2H). <sup>13</sup>C{<sup>1</sup>H} NMR (100 MHz, CDCl<sub>3</sub>) δ 153.3, 140.5, 116.9, 115.3, 56.3. Spectral datas obtained for the compound are in good agreement with the reported datas.<sup>[2]</sup>

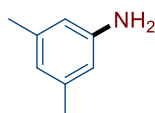

**3,5-Dimethylaniline (2):** yellow oil; <sup>1</sup>H NMR (400 MHz, CDCl<sub>3</sub>) δ 6.43 (s, 1H), 6.35 (s, 2H), 3.45 (br, 2H), 2.23 (s, 6H). <sup>13</sup>C{<sup>1</sup>H} NMR (100 MHz, CDCl<sub>3</sub>) δ 146.3, 139.1, 120.7, 113.2, 21.4. Spectral datas obtained for the compound are in good agreement with the reported datas.<sup>[2]</sup>

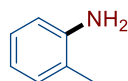

**o-Toluidine (23):** light yellow oil; <sup>1</sup>H NMR (400 MHz, CDCl<sub>3</sub>) δ 7.11 – 7.07 (m, 2H), 6.76 (t, *J* = 7.3 Hz, 1H), 6.71 (d, *J* = 7.8 Hz, 1H), 3.59 (s, 2H), 2.21 (s, 3H). <sup>13</sup>C{<sup>1</sup>H} NMR (100 MHz, CDCl<sub>3</sub>) δ 144.7, 130.5, 127.0, 122.4, 118.7, 115.0, 17.4. Spectral datas obtained for the compound are in good agreement with the reported datas.<sup>[6]</sup>

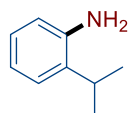

**2-Isopropylaniline (24):** yellow oil; <sup>1</sup>H NMR (400 MHz, CDCl<sub>3</sub>) δ 7.16 (dd, *J* = 7.7, 1.5 Hz, 1H), 7.04 (td, *J* = 7.7, 1.5 Hz, 1H), 6.80 (td, *J* = 7.9, 1.1 Hz, 1H), 6.69 (dd, *J* = 7.9, 1.1 Hz, 1H), 3.65 (s, 2H), 2.92 (hept, *J* = 6.8 Hz, 1H), 1.28 (d, *J* = 6.8 Hz, 6H). <sup>13</sup>C{<sup>1</sup>H} NMR (100 MHz, CDCl<sub>3</sub>) δ 143.4, 132.8, 126.6, 125.5, 119.2, 116.0, 27.8, 22.4. Spectral datas obtained for the compound are in good agreement with the reported

datas.<sup>[2]</sup>

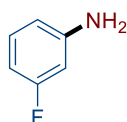

**3-Fluoroaniline (25):** yellow oil; <sup>1</sup>H NMR (400 MHz, CDCl<sub>3</sub>) δ 7.12 – 7.06 (m, 1H), 6.47 – 6.36 (m, 3H), 3.71 (br, 2H). <sup>13</sup>C{<sup>1</sup>H} NMR (100 MHz, CDCl<sub>3</sub>) δ 164.0 (d, *J* = 244.4 Hz), 148.4 (d, *J* = 11.1 Hz), 130.6 (d, *J* = 10.1 Hz), 110.8 (d, *J* = 2.0 Hz), 105.2 (d, *J* = 21.2 Hz), 102.1 (d, *J* = 25.3 Hz). <sup>19</sup>F NMR (376 MHz, CDCl<sub>3</sub>) δ -113.20. Spectral datas obtained for the compound are in good agreement with the reported datas.<sup>[10]</sup>

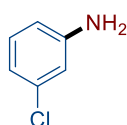

**3-Chloroaniline (26):** yellow oil; <sup>1</sup>H NMR (400 MHz, CDCl<sub>3</sub>) δ 7.07 (t, *J* = 8.0 Hz, 1H), 6.73 (dd, *J* = 8.0, 1.0 Hz, 1H), 6.67 (t, *J* = 2.0 Hz, 1H), 6.54 (dd, *J* = 8.0, 1.5 Hz, 1H), 3.67 (br, 2H). <sup>13</sup>C{<sup>1</sup>H} NMR (100 MHz, CDCl<sub>3</sub>) δ 147.8, 134.9, 130.4, 118.5, 115.0, 113.3. Spectral datas obtained for the compound are in good agreement with the reported datas.<sup>[6]</sup>

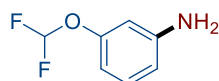

**3-(Difluoromethoxy)aniline (27):** yellow oil; <sup>1</sup>H NMR (400 MHz, CDCl<sub>3</sub>) δ 7.12 (t, *J* = 8.0 Hz, 1H), 6.66 – 6.29 (m, 4H), 3.63 (br, 2H). <sup>13</sup>C{<sup>1</sup>H} NMR (100 MHz, CDCl<sub>3</sub>) δ 151.7, 147.2, 129.6, 115.2 (t, *J* = 259.6 Hz), 111.1, 107.8, 105.0. <sup>19</sup>F NMR (376 MHz, CDCl<sub>3</sub>) δ -80.24 (d, *J* = 71.4 Hz). Spectral datas obtained for the compound are in good agreement with the reported datas.<sup>[12]</sup>

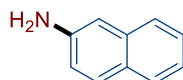

**Naphthalen-2-amine (28):** white solid; <sup>1</sup>H NMR (400 MHz, CDCl<sub>3</sub>) δ 7.74 – 7.68 (m, 2H), 7.63 (d, *J* = 8.5 Hz, 1H), 7.41 (t, *J* = 7.1 Hz, 1H), 7.27 (t, *J* = 9.1 Hz, 1H), 7.00 – 6.96 (m, 2H), 3.86 (br, 2H). <sup>13</sup>C{<sup>1</sup>H} NMR (100 MHz, CDCl<sub>3</sub>) δ 144.2, 135.1, 129.3, 128.1, 127.8, 126.5, 125.9, 122.6, 118.4, 108.7. Spectral datas obtained for the compound are in good agreement with the reported datas.<sup>[8]</sup>

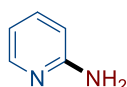

**Pyridin-2-amine (29):** light yellow oil; <sup>1</sup>H NMR (400 MHz, CDCl<sub>3</sub>) δ 8.02 (d, *J* = 4.9

Hz, 1H), 7.36 (td,  $J = 8.3, 1.8$  Hz, 1H), 6.58 (td,  $J = 4.9, 1.8$  Hz, 1H), 6.44 (d,  $J = 8.3$  Hz, 1H), 4.57 (br, 2H).  $^{13}\text{C}\{^1\text{H}\}$  NMR (100 MHz,  $\text{CDCl}_3$ )  $\delta$  158.6, 148.1, 137.7, 113.9, 108.6. Spectral datas obtained for the compound are in good agreement with the reported datas.<sup>[3]</sup>

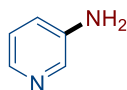

**Pyridin-3-amine (30):** light yellow oil;  $^1\text{H}$  NMR (400 MHz,  $\text{CDCl}_3$ )  $\delta$  8.04 (d,  $J = 2.7$  Hz, 1H), 7.95 (d,  $J = 4.7$  Hz, 1H), 7.00 (dd,  $J = 8.1, 4.7$  Hz, 1H), 6.91 (dd,  $J = 8.1, 2.7$  Hz, 1H), 3.82 (br, 2H).  $^{13}\text{C}\{^1\text{H}\}$  NMR (100 MHz,  $\text{CDCl}_3$ )  $\delta$  142.8, 139.8, 137.4, 123.7, 121.4. Spectral datas obtained for the compound are in good agreement with the reported datas.<sup>[3]</sup>

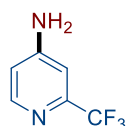

**4-(Trifluoromethyl)pyridin-2-amine (31):** brown oil;  $^1\text{H}$  NMR (400 MHz,  $\text{CDCl}_3$ )  $\delta$  8.25 (d,  $J = 5.5$  Hz, 1H), 6.86 (d,  $J = 1.8$  Hz, 1H), 6.62 (dd,  $J = 5.5, 1.8$  Hz, 1H), 4.65 (br, 2H).  $^{13}\text{C}\{^1\text{H}\}$  NMR (100 MHz,  $\text{CDCl}_3$ )  $\delta$  154.0, 150.4, 149.0 (q,  $J = 34.0$  Hz), 121.8 (q,  $J = 272.0$  Hz), 111.2, 106.4 (q,  $J = 2.0$  Hz).  $^{19}\text{F}$  NMR (376 MHz,  $\text{CDCl}_3$ )  $\delta$  -68.54. Spectral datas obtained for the compound are in good agreement with the reported datas.<sup>[2]</sup>

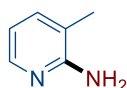

**3-Methylpyridin-2-amine (32):** yellow oil;  $^1\text{H}$  NMR (400 MHz,  $\text{CDCl}_3$ )  $\delta$  7.89 (d,  $J = 6.0$  Hz, 1H), 7.19 (d,  $J = 8.0$  Hz, 1H), 6.54 (dd,  $J = 8.0, 6.0$  Hz, 1H), 4.56 (br, 2H), 2.05 (s, 3H).  $^{13}\text{C}\{^1\text{H}\}$  NMR (100 MHz,  $\text{CDCl}_3$ )  $\delta$  157.3, 145.6, 137.6, 116.5, 114.2, 17.1. Spectral datas obtained for the compound are in good agreement with the reported datas.<sup>[9]</sup>

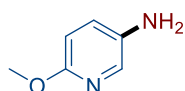

**6-Methoxypyridin-3-amine (33):** brown oil;  $^1\text{H}$  NMR (400 MHz,  $\text{CDCl}_3$ )  $\delta$  7.65 (d,  $J = 2.9$  Hz, 1H), 7.01 (dd,  $J = 8.7, 2.9$  Hz, 1H), 6.59 (d,  $J = 8.7$  Hz, 1H), 3.85 (s, 3H), 3.16 (br, 2H).  $^{13}\text{C}\{^1\text{H}\}$  NMR (100 MHz,  $\text{CDCl}_3$ )  $\delta$  158.2, 136.8, 133.0, 127.8, 110.8, 53.4. Spectral datas obtained for the compound are in good agreement with the reported

datas.<sup>[9]</sup>

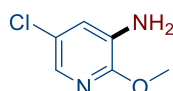

**5-Chloro-2-methoxypyridin-3-amine (34):** yellow solid;  $^1\text{H}$  NMR (400 MHz,  $\text{CDCl}_3$ )  $\delta$  7.48 (d,  $J = 2.2$  Hz, 1H), 6.84 (d,  $J = 2.2$  Hz, 1H), 3.95 (s, 3H), 3.60 (br, 2H).  $^{13}\text{C}\{^1\text{H}\}$  NMR (100 MHz,  $\text{CDCl}_3$ )  $\delta$  151.5, 132.7, 131.8, 124.4, 119.6, 53.7. Spectral datas obtained for the compound are in good agreement with the reported datas.<sup>[9]</sup>

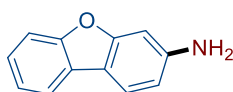

**Dibenzo[b,d]furan-3-amine (35):** light yellow solid;  $^1\text{H}$  NMR (400 MHz,  $\text{CDCl}_3$ )  $\delta$  7.78 (d,  $J = 7.3$  Hz, 1H), 7.68 (d,  $J = 8.2$  Hz, 1H), 7.47 (d,  $J = 7.9$  Hz, 1H), 7.33 – 7.25 (m, 2H), 6.84 (s, 1H), 6.68 (d,  $J = 8.0$  Hz, 1H), 3.36 (br, 2H).  $^{13}\text{C}\{^1\text{H}\}$  NMR (100 MHz,  $\text{CDCl}_3$ )  $\delta$  158.1, 156.1, 146.9, 125.3, 125.0, 122.7, 121.4, 119.5, 115.8, 111.4, 111.3, 97.6. Spectral datas obtained for the compound are in good agreement with the reported datas.<sup>[11]</sup>

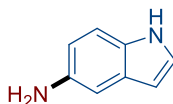

**1H-Indol-5-amine (36):** yellow oil;  $^1\text{H}$  NMR (400 MHz,  $\text{CDCl}_3$ )  $\delta$  7.96 (br, 1H), 7.19 (d,  $J = 8.5$  Hz, 1H), 7.12 (s, 1H), 6.95 (s, 1H), 6.67 (d,  $J = 8.5$  Hz, 1H), 6.38 (s, 1H), 3.50 (br, 2H).  $^{13}\text{C}\{^1\text{H}\}$  NMR (100 MHz,  $\text{CDCl}_3$ )  $\delta$  139.7, 130.9, 129.0, 124.8, 113.1, 111.6, 105.7, 101.7. Spectral datas obtained for the compound are in good agreement with the reported datas.<sup>[2]</sup>

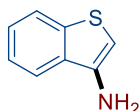

**Benzo[b]thiophen-3-amine (37):** yellow solid;  $^1\text{H}$  NMR (400 MHz,  $\text{CDCl}_3$ )  $\delta$  7.64 (d,  $J = 8.5$  Hz, 1H), 7.38 (d,  $J = 5.4$  Hz, 1H), 7.15 (d,  $J = 5.4$  Hz, 1H), 7.10 (d,  $J = 1.8$  Hz, 1H), 6.78 (dd,  $J = 8.5, 1.8$  Hz, 1H), 3.58 (br, 2H).  $^{13}\text{C}\{^1\text{H}\}$  NMR (100 MHz,  $\text{CDCl}_3$ )  $\delta$  143.7, 141.0, 130.6, 127.2, 123.2, 123.1, 115.0, 108.4. Spectral datas obtained for the compound are in good agreement with the reported datas.<sup>[2]</sup>

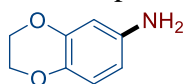

**2,3-Dihydrobenzo[b][1,4]dioxin-6-amine (38):** yellow oil;  $^1\text{H}$  NMR (400 MHz,  $\text{CDCl}_3$ )  $\delta$  6.67 (d,  $J = 8.5$  Hz, 1H), 6.24 (d,  $J = 2.6$  Hz, 1H), 6.20 (dd,  $J = 8.5, 2.6$  Hz, 1H), 4.22 – 4.20 (m, 2H), 4.18 – 4.16 (m, 2H), 3.28 (br, 2H).  $^{13}\text{C}\{^1\text{H}\}$  NMR (100 MHz,  $\text{CDCl}_3$ )  $\delta$  144.0, 140.9, 136.5, 117.7, 108.8, 104.3, 64.8, 64.3. Spectral datas obtained for the compound are in good agreement with the reported datas.<sup>[2]</sup>

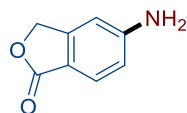

**5-Aminoisobenzofuran-1(3H)-one (39):** yellow solid;  $^1\text{H}$  NMR (400 MHz,  $\text{DMSO}-d_6$ )  $\delta$  7.48 (d,  $J = 8.4$  Hz, 1H), 6.70 (d,  $J = 8.4$  Hz, 1H), 6.62 (s, 1H), 6.28 (s, 2H), 5.19 (s, 2H).  $^{13}\text{C}\{^1\text{H}\}$  NMR (100 MHz,  $\text{DMSO}-d_6$ )  $\delta$  170.8, 154.7, 150.2, 126.2, 114.8, 111.1, 104.5, 68.7. Spectral datas obtained for the compound are in good agreement with the reported datas.<sup>[2]</sup>

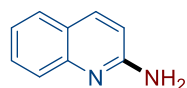

**Quinolin-2-amine (40):** brown solid;  $^1\text{H}$  NMR (400 MHz,  $\text{CDCl}_3$ )  $\delta$  7.86 (d,  $J = 8.8$  Hz, 1H), 7.66 (d,  $J = 8.4$  Hz, 1H), 7.61 (d,  $J = 8.0$  Hz, 1H), 7.55 (td,  $J = 7.0, 1.3$  Hz, 1H), 7.25 (t,  $J = 7.0$  Hz, 1H), 6.71 (d,  $J = 8.8$  Hz, 1H), 4.96 (br, 2H).  $^{13}\text{C}\{^1\text{H}\}$  NMR (100 MHz,  $\text{CDCl}_3$ )  $\delta$  157.2, 147.8, 138.2, 129.9, 127.6, 126.1, 123.7, 122.8, 111.8. Spectral datas obtained for the compound are in good agreement with the reported datas.<sup>[9]</sup>

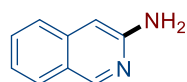

**Isoquinolin-3-amine (41):** brown solid;  $^1\text{H}$  NMR (400 MHz,  $\text{CDCl}_3$ )  $\delta$  8.93 (s, 1H), 7.79 (d,  $J = 8.2$  Hz, 1H), 7.55 – 7.49 (m, 2H), 7.26 (t,  $J = 8.2$  Hz, 1H), 6.77 (s, 1H), 4.52 (br, 2H).  $^{13}\text{C}\{^1\text{H}\}$  NMR (100 MHz,  $\text{CDCl}_3$ )  $\delta$  154.7, 151.8, 139.0, 130.5, 127.9, 124.8, 124.2, 123.2, 99.7. Spectral datas obtained for the compound are in good agreement with the reported datas.<sup>[9]</sup>

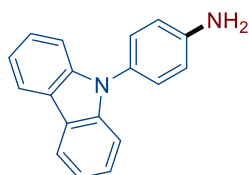

**4-(9H-Carbazol-9-yl)aniline (42):** yellow solid;  $^1\text{H}$  NMR (400 MHz,  $\text{CDCl}_3$ )  $\delta$  8.18 (d,  $J = 7.7$  Hz, 2H), 7.45 – 7.42 (m, 2H), 7.37 (d,  $J = 7.9$  Hz, 2H), 7.33 – 7.28 (m, 4H), 6.86 (d,  $J = 8.5$  Hz, 2H), 3.80 (br, 2H).  $^{13}\text{C}\{^1\text{H}\}$  NMR (100 MHz,  $\text{CDCl}_3$ )  $\delta$  146.1,

141.7, 128.6, 128.3, 125.9, 123.1, 120.3, 119.6, 116.0, 109.9. Spectral data obtained for the compound are in good agreement with the reported data.<sup>[2]</sup>

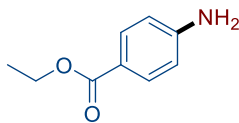

**Ethyl 4-aminobenzoate (76):** yellow solid; <sup>1</sup>H NMR (400 MHz, CDCl<sub>3</sub>) δ 7.86 (d, *J* = 8.7 Hz, 2H), 6.63 (d, *J* = 8.7 Hz, 2H), 4.31 (q, *J* = 7.1 Hz, 2H), 4.05 (br, 2H), 1.36 (t, *J* = 7.1 Hz, 3H). <sup>13</sup>C{<sup>1</sup>H} NMR (100 MHz, Chloroform-*d*) δ 166.83, 150.84, 131.69, 120.31, 113.92, 76.84, 60.43, 14.56. Spectral data obtained for the compound are in good agreement with the reported data.<sup>[2]</sup>

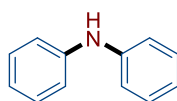

**Diphenylamine (45):** brown solid; <sup>1</sup>H NMR (400 MHz, CDCl<sub>3</sub>) δ 7.32 (t, *J* = 7.7 Hz, 4H), 7.12 (d, *J* = 8.1 Hz, 4H), 6.99 (t, *J* = 7.3 Hz, 2H), 5.72 (br, 1H). <sup>13</sup>C{<sup>1</sup>H} NMR (100 MHz, CDCl<sub>3</sub>) δ 143.3, 129.5, 121.2, 118.0. Spectral data obtained for the compound are in good agreement with the reported data.<sup>[13]</sup>

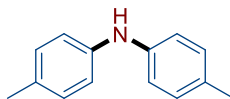

**Di-*p*-tolylamine (46):** white solid; <sup>1</sup>H NMR (400 MHz, CDCl<sub>3</sub>) δ 7.07 (d, *J* = 8.2 Hz, 4H), 6.95 (d, *J* = 8.2 Hz, 4H), 5.51 (br, 1H), 2.30 (s, 6H). <sup>13</sup>C{<sup>1</sup>H} NMR (100 MHz, CDCl<sub>3</sub>) δ 141.3, 130.3, 130.0, 118.1, 20.8. Spectral data obtained for the compound are in good agreement with the reported data.<sup>[13]</sup>

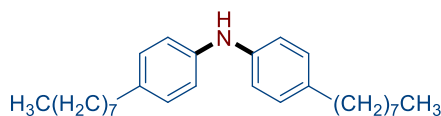

**Bis(4-octylphenyl)amine (47):** brown oil; <sup>1</sup>H NMR (400 MHz, CDCl<sub>3</sub>) δ 7.06 (d, *J* = 8.4 Hz, 4H), 6.97 (d, *J* = 8.4 Hz, 4H), 2.54 (t, *J* = 7.6 Hz, 4H), 1.59 (p, *J* = 7.4 Hz, 4H), 1.34 – 1.26 (m, 20H), 0.88 (t, *J* = 6.8 Hz, 6H). <sup>13</sup>C{<sup>1</sup>H} NMR (100 MHz, CDCl<sub>3</sub>) δ 141.4, 135.6, 129.3, 118.0, 35.4, 32.1, 31.9, 29.7, 29.5, 29.4, 22.8, 14.3. Spectral data obtained for the compound are in good agreement with the reported data.<sup>[15]</sup>

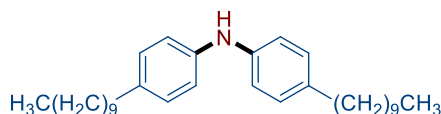

**Bis(4-decylphenyl)amine (48):** black solid; <sup>1</sup>H NMR (400 MHz, CDCl<sub>3</sub>) δ 7.07 (d, *J* = 8.4 Hz, 4H), 6.98 (d, *J* = 8.4 Hz, 4H), 2.55 (t, *J* = 7.6 Hz, 4H), 1.60 (p, *J* = 7.2 Hz,

4H), 1.32 – 1.28 (m, 28H), 0.90 (t,  $J = 6.8$  Hz, 6H).  $^{13}\text{C}\{^1\text{H}\}$  NMR (100 MHz,  $\text{CDCl}_3$ )  $\delta$  141.4, 135.6, 129.3, 118.0, 35.4, 32.1, 31.9, 29.9, 29.8, 29.8, 29.7, 29.5, 22.8, 14.3. HRMS (ESI)  $m/z$  calc. for  $\text{C}_{32}\text{H}_{52}\text{N}$   $[\text{M}+\text{H}]^+$ : 450.4094, found: 450.4089.

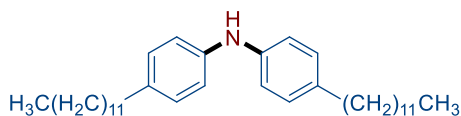

**Bis(4-dodecylphenyl)amine (49):** brown solid;  $^1\text{H}$  NMR (400 MHz,  $\text{CDCl}_3$ )  $\delta$  7.06 (d,  $J = 8.3$  Hz, 4H), 6.97 (d,  $J = 8.3$  Hz, 4H), 5.56 (br, 1H), 2.62 – 2.47 (m, 4H), 1.65 – 1.53 (m, 6H), 1.27 (s, 34H), 0.89 (t,  $J = 6.7$  Hz, 6H).  $^{13}\text{C}\{^1\text{H}\}$  NMR (100 MHz,  $\text{CDCl}_3$ )  $\delta$  141.4, 135.6, 129.3, 118.0, 35.4, 32.1, 31.9, 29.8, 29.8, 29.8, 29.7, 29.7, 29.5, 29.5, 22.9, 14.3. HRMS (ESI)  $m/z$  calc. for  $\text{C}_{36}\text{H}_{60}\text{N}$   $[\text{M}+\text{H}]^+$ : 506.4720, found: 506.4716.

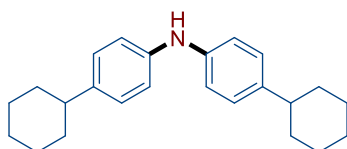

**Bis(4-cyclohexylphenyl)amine (50):** brown solid;  $^1\text{H}$  NMR (400 MHz,  $\text{CDCl}_3$ )  $\delta$  7.10 (d,  $J = 8.4$  Hz, 4H), 6.98 (d,  $J = 8.4$  Hz, 4H), 2.52 – 2.39 (m, 2H), 1.94 – 1.67 (m, 11H), 1.39 (p,  $J = 12.0$  Hz, 9H).  $^{13}\text{C}\{^1\text{H}\}$  NMR (100 MHz,  $\text{CDCl}_3$ )  $\delta$  141.4, 140.7, 127.5, 43.82, 34.8 27.0, 26.21. HRMS (ESI)  $m/z$  calc. for  $\text{C}_{24}\text{H}_{32}\text{N}$   $[\text{M}+\text{H}]^+$ : 334.2529, found: 334.2529.

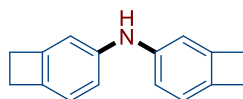

**N-(Bicyclo[4.2.0]octa-1,3,5-trien-3-yl)bicyclo[4.2.0]octa-1(6),2,4-trien-3-amine (51):** brown solid;  $^1\text{H}$  NMR (400 MHz,  $\text{CDCl}_3$ )  $\delta$  6.92 (d,  $J = 7.8$  Hz, 2H), 6.84 (d,  $J = 7.8$  Hz, 2H), 6.81 (s, 2H), 3.12 (s, 8H).  $^{13}\text{C}\{^1\text{H}\}$  NMR (100 MHz,  $\text{CDCl}_3$ )  $\delta$  146.6, 143.3, 138.2, 123.5, 117.6, 113.2, 29.3, 29.1. HRMS (ESI)  $m/z$  calc. for  $\text{C}_{16}\text{H}_{16}\text{N}$   $[\text{M}+\text{H}]^+$ : 222.1277, found: 222.1275.

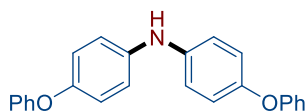

**Bis(4-phenoxyphenyl)amine (52):** gray solid;  $^1\text{H}$  NMR (400 MHz,  $\text{CDCl}_3$ )  $\delta$  7.36 – 7.29 (m, 4H), 7.11 – 6.92 (m, 14H), 5.55 (br, 1H).  $^{13}\text{C}\{^1\text{H}\}$  NMR (100 MHz,  $\text{CDCl}_3$ )  $\delta$  158.4, 150.9, 139.8, 129.8, 122.7, 120.8, 119.5, 118.0. HRMS (ESI)  $m/z$  calc. for  $\text{C}_{24}\text{H}_{20}\text{NO}_2$   $[\text{M}+\text{H}]^+$ : 354.1489, found: 354.1488.

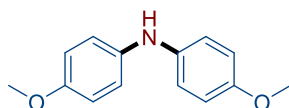

**Bis(4-methoxyphenyl)amine (53):** black solid;  $^1\text{H}$  NMR (400 MHz,  $\text{CDCl}_3$ )  $\delta$  6.94 (d,  $J = 8.7$  Hz, 4H), 6.83 (d,  $J = 8.7$  Hz, 4H), 5.30 (br, 1H), 3.78 (s, 6H).  $^{13}\text{C}\{^1\text{H}\}$  NMR (100 MHz,  $\text{CDCl}_3$ )  $\delta$  154.4, 138.1, 119.7, 114.8, 55.8. Spectral datas obtained for the compound are in good agreement with the reported datas.<sup>[15]</sup>

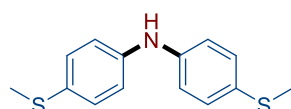

**Bis(4-(methylthio)phenyl)amine (54):** black solid;  $^1\text{H}$  NMR (400 MHz,  $\text{CDCl}_3$ )  $\delta$  7.14 (d,  $J = 7.0$  Hz, 4H), 6.89 (d,  $J = 7.4$  Hz, 4H), 5.56 (br, 1H), 2.36 (s, 6H).  $^{13}\text{C}\{^1\text{H}\}$  NMR (100 MHz,  $\text{CDCl}_3$ )  $\delta$  141.4, 130.0, 129.4, 118.7, 18.0. Spectral datas obtained for the compound are in good agreement with the reported datas.<sup>[16]</sup>

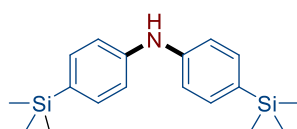

**Bis(4-(trimethylsilyl)phenyl)amine (55):** brown oil;  $^1\text{H}$  NMR (400 MHz,  $\text{CDCl}_3$ )  $\delta$  7.45 (d,  $J = 8.4$  Hz, 4H), 7.11 (d,  $J = 8.4$  Hz, 4H), 5.80 (br, 1H). 0.28 (s, 18H).  $^{13}\text{C}\{^1\text{H}\}$  NMR (100 MHz,  $\text{CDCl}_3$ )  $\delta$  143.5, 134.7, 131.9, 117.2, -0.3. HRMS (ESI)  $m/z$  calc. for  $\text{C}_{18}\text{H}_{28}\text{NSi}_2$   $[\text{M}+\text{H}]^+$ : 314.1760, found: 314.1757.

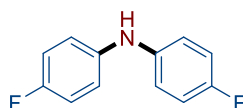

**Bis(4-fluorophenyl)amine (56):** brown oil;  $^1\text{H}$  NMR (400 MHz,  $\text{CDCl}_3$ )  $\delta$  6.96 (m, 8H), 5.48 (br, 1H).  $^{13}\text{C}\{^1\text{H}\}$  NMR (100 MHz,  $\text{CDCl}_3$ )  $\delta$  157.8 (d,  $J = 240.4$  Hz), 139.8 (d,  $J = 2.0$  Hz), 119.4 (d,  $J = 8.1$  Hz), 116.0 (d,  $J = 22.2$  Hz)  $^{19}\text{F}$  NMR (376 MHz,  $\text{CDCl}_3$ )  $\delta$  -122.63. Spectral datas obtained for the compound are in good agreement with the reported datas.<sup>[13]</sup>

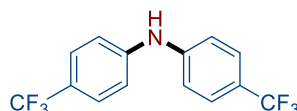

**Bis(4-(trifluoromethyl)phenyl)amine (57):** brown oil;  $^1\text{H}$  NMR (400 MHz,  $\text{CDCl}_3$ )  $\delta$  7.55 (d,  $J = 8.5$  Hz, 4H), 7.16 (d,  $J = 8.5$  Hz, 4H), 6.11 (br, 1H).  $^{13}\text{C}\{^1\text{H}\}$  NMR (100 MHz,  $\text{CDCl}_3$ )  $\delta$  145.1, 124.6 (d,  $J = 271.7$  Hz), 127.1 (d,  $J = 3.0$  Hz), 123.9 (d,  $J = 32.3$



Hz), 117.7.  $^{19}\text{F}$  NMR (376 MHz,  $\text{CDCl}_3$ )  $\delta$  -61.78. Spectral datas obtained for the compound are in good agreement with the reported datas.<sup>[13]</sup>

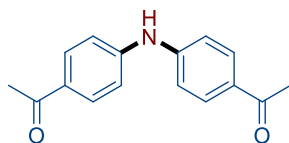

**1,1'-(Azanediylbis(4,1-phenylene))bis(ethan-1-one) (58):** black solid;  $^1\text{H}$  NMR (400 MHz,  $\text{CDCl}_3$ )  $\delta$  7.92 (d,  $J$  = 8.8 Hz, 4H), 7.15 (d,  $J$  = 8.8 Hz, 4H), 2.56 (s, 6H).  $^{13}\text{C}\{^1\text{H}\}$  NMR (100 MHz,  $\text{CDCl}_3$ )  $\delta$  196.6, 146.1, 131.0, 130.6, 117.1, 26.4. Spectral datas obtained for the compound are in good agreement with the reported datas.<sup>[18]</sup>

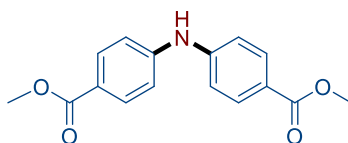

**Dimethyl 4,4'-azanediyl dibenzoate (44):** yellow solid;  $^1\text{H}$  NMR (400 MHz,  $\text{CDCl}_3$ )  $\delta$  7.96 (d,  $J$  = 8.6 Hz, 4H), 7.12 (d,  $J$  = 8.6 Hz, 4H), 6.61 (br, 1H), 3.88 (s, 6H).  $^{13}\text{C}\{^1\text{H}\}$  NMR (100 MHz,  $\text{CDCl}_3$ )  $\delta$  166.8, 146.0, 131.6, 123.3, 117.1, 52.0. Spectral datas obtained for the compound are in good agreement with the reported datas.<sup>[18]</sup>

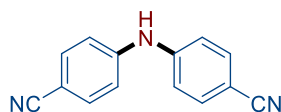

**4,4'-Azanediyl dibenzonitrile (59):** brown solid;  $^1\text{H}$  NMR (400 MHz,  $\text{DMSO-}d_6$ )  $\delta$  9.51 (br, 1H), 7.74 (d,  $J$  = 7.4 Hz, 4H), 7.30 (d,  $J$  = 7.4 Hz, 4H).  $^{13}\text{C}\{^1\text{H}\}$  NMR (100 MHz,  $\text{DMSO-}d_6$ )  $\delta$  145.7, 133.7, 119.4, 117.3, 102.1. Spectral datas obtained for the compound are in good agreement with the reported datas.<sup>[19]</sup>

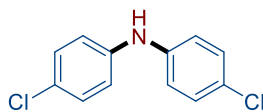

**Bis(4-chlorophenyl)amine (60):** brown oil;  $^1\text{H}$  NMR (400 MHz,  $\text{CDCl}_3$ )  $\delta$  7.22 (d,  $J$  = 8.7 Hz, 4H), 6.96 (d,  $J$  = 8.7 Hz, 4H), 5.64 (br, 1H).  $^{13}\text{C}\{^1\text{H}\}$  NMR (100 MHz,  $\text{CDCl}_3$ )  $\delta$  141.4, 129.4, 126.1, 112.0. Spectral datas obtained for the compound are in good agreement with the reported datas.<sup>[13]</sup>

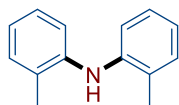

**Di-*o*-tolylamine (61):** white solid;  $^1\text{H}$  NMR (400 MHz,  $\text{CDCl}_3$ )  $\delta$  7.21 (d,  $J$  = 7.4 Hz, 2H), 7.13 (t,  $J$  = 7.6 Hz, 2H), 7.00 (d,  $J$  = 7.9 Hz, 2H), 6.92 (t,  $J$  = 7.4 Hz, 2H), 5.16 (br, 1H), 2.28 (s, 6H).  $^{13}\text{C}\{^1\text{H}\}$  NMR (100 MHz,  $\text{CDCl}_3$ )  $\delta$  142.1, 131.0, 127.1, 126.9, 121.5,

118.4, 17.9. Spectral datas obtained for the compound are in good agreement with the reported datas.<sup>[14]</sup>

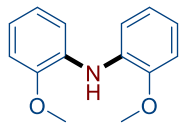

**Bis(2-methoxyphenyl)amine (62):** brown solid; <sup>1</sup>H NMR (400 MHz, CDCl<sub>3</sub>) δ 7.39 (d, *J* = 7.6 Hz, 2H), 6.95 – 6.84 (m, 6H), 6.52 (br, 1H), 3.91 (s, 6H). <sup>13</sup>C{<sup>1</sup>H} NMR (100 MHz, CDCl<sub>3</sub>) δ 149.2, 132.7, 120.9, 120.3, 115.7, 110.8, 55.8. HRMS (ESI) *m/z* calc. for C<sub>14</sub>H<sub>15</sub>NNaO<sub>2</sub> [M+Na]<sup>+</sup>: 252.1000, found: 252.0990.

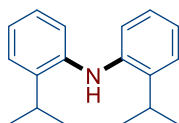

**Bis(2-isopropylphenyl)amine (63):** colorless oil; <sup>1</sup>H NMR (400 MHz, CDCl<sub>3</sub>) δ 7.30 (d, *J* = 7.6 Hz, 2H), 7.10 (t, *J* = 7.6 Hz, 2H), 7.02 – 6.94 (m, 4H), 5.33 (br, 1H), 3.12 (hept, *J* = 6.8 Hz, 2H), 1.30 (d, *J* = 6.8 Hz, 12H). <sup>13</sup>C{<sup>1</sup>H} NMR (100 MHz, CDCl<sub>3</sub>) δ 141.4, 138.2, 126.5, 125.8, 121.8, 119.4, 27.8, 22.8. Spectral datas obtained for the compound are in good agreement with the reported datas.<sup>[14]</sup>

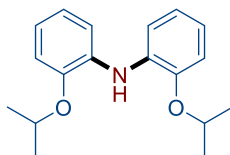

**Bis(2-isopropoxyphenyl)amine (64):** brown solid; <sup>1</sup>H NMR (400 MHz, CDCl<sub>3</sub>) δ 7.43 (d, *J* = 7.8 Hz, 2H), 6.90 (t, *J* = 7.7 Hz, 4H), 6.81 (m, 2H), 4.55 (hept, *J* = 5.7 Hz, 2H), 1.39 (d, *J* = 6.0 Hz, 12H). <sup>13</sup>C{<sup>1</sup>H} NMR (100 MHz, CDCl<sub>3</sub>) δ 146.9, 134.1, 121.1, 119.7, 115.0, 114.3, 71.4, 22.5. HRMS (ESI) *m/z* calc. for C<sub>18</sub>H<sub>23</sub>NNaO<sub>2</sub> [M+Na]<sup>+</sup>: 308.1626, found: 308.1621.

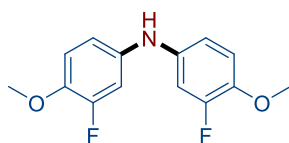

**Bis(3-fluoro-4-methoxyphenyl)amine (65):** black solid; <sup>1</sup>H NMR (400 MHz, CDCl<sub>3</sub>) δ 6.88 (t, *J* = 9.0 Hz, 2H), 6.79 (dd, *J* = 12.8, 2.7 Hz, 2H), 6.68 – 6.71 (m, 2H), 3.86 (s, 6H). <sup>13</sup>C{<sup>1</sup>H} NMR (100 MHz, CDCl<sub>3</sub>) δ 153.2 (d, *J* = 246.4 Hz), 142.5 (d, *J* = 11.11 Hz), 137.9 (d, *J* = 9.1 Hz), 115.3 (d, *J* = 3.0 Hz), 113.9 (d, *J* = 4.0 Hz), 107.3 (d, *J* = 21.2 Hz), 57.2. <sup>19</sup>F NMR (376 MHz, CDCl<sub>3</sub>) δ -132.92. HRMS (ESI) *m/z* calc. for C<sub>14</sub>H<sub>13</sub>F<sub>2</sub>NNaO<sub>2</sub> [M+Na]<sup>+</sup>: 288.0807, found: 288.0807.

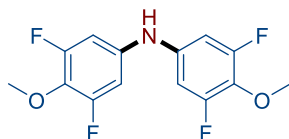

**Bis(3,5-difluoro-4-methoxyphenyl)amine (66):** brown solid;  $^1\text{H}$  NMR (400 MHz,  $\text{CDCl}_3$ )  $\delta$  6.65 – 6.49 (m, 4H), 5.58 (br, 1H), 3.93 (s, 6H).  $^{13}\text{C}\{^1\text{H}\}$  NMR (100 MHz,  $\text{CDCl}_3$ )  $\delta$  156.8 (dd,  $J = 248.5, 8.1$  Hz), 138.0 (t,  $J = 12.1$  Hz), 131.3 (t,  $J = 15.2$  Hz), (102.5, 102.4, 102.3, 102.2), 62.3 (t,  $J = 3.0$  Hz).  $^{19}\text{F}$  NMR (376 MHz,  $\text{CDCl}_3$ )  $\delta$  -127.30. HRMS (ESI)  $m/z$  calc. for  $\text{C}_{14}\text{H}_{11}\text{F}_4\text{NNaO}_2$  [ $\text{M}+\text{Na}$ ] $^+$ : 324.0618, found: 324.0622.

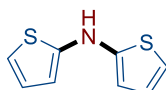

**Di(thiophen-2-yl)amine (67):** brown solid;  $^1\text{H}$  NMR (400 MHz,  $\text{CDCl}_3$ )  $\delta$  7.39 – 7.30 (m, 2H), 7.21 (dd,  $J = 3.5, 1.2$  Hz, 2H), 7.00 – 6.92 (m, 2H).  $^{13}\text{C}\{^1\text{H}\}$  NMR (100 MHz,  $\text{CDCl}_3$ )  $\delta$  135.7, 132.9, 129.8, 127.6. Spectral datas obtained for the compound are in good agreement with the reported datas.<sup>[20]</sup>

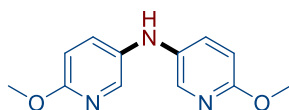

**Bis(6-methoxypyridin-3-yl)amine (68):** brown oil;  $^1\text{H}$  NMR (400 MHz,  $\text{CDCl}_3$ )  $\delta$  7.86 (d,  $J = 2.9$  Hz, 2H), 7.27 (dd,  $J = 8.8, 2.9$  Hz, 2H), 6.67 (d,  $J = 8.8$  Hz, 2H), 5.21 (br, 1H), 3.89 (s, 6H).  $^{13}\text{C}\{^1\text{H}\}$  NMR (100 MHz,  $\text{CDCl}_3$ )  $\delta$  159.8, 137.0, 134.7, 130.5, 111.2, 53.6. HRMS (ESI)  $m/z$  calc. for  $\text{C}_{12}\text{H}_{14}\text{N}_3\text{O}_2$  [ $\text{M}+\text{H}$ ] $^+$ : 232.1081, found: 232.1078.

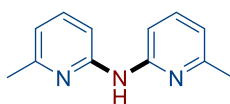

**Bis(6-methylpyridin-2-yl)amine (69):** yellow oil;  $^1\text{H}$  NMR (400 MHz,  $\text{CDCl}_3$ )  $\delta$  7.47 (t,  $J = 7.8$  Hz, 2H), 7.36 (d,  $J = 8.2$  Hz, 2H), 7.28 (br, 1H), 6.69 (d,  $J = 7.3$  Hz, 2H), 2.46 (s, 6H).  $^{13}\text{C}\{^1\text{H}\}$  NMR (100 MHz,  $\text{CDCl}_3$ )  $\delta$  156.8, 153.6, 138.1, 115.6, 108.4, 24.4. Spectral datas obtained for the compound are in good agreement with the reported datas.<sup>[17]</sup>

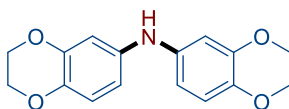

**Bis(2,3-dihydrobenzo[b][1,4]dioxin-6-yl)amine (70):** black solid;  $^1\text{H}$  NMR (400 MHz,  $\text{CDCl}_3$ )  $\delta$  6.75 (d,  $J = 8.6$  Hz, 2H), 6.56 (s, 2H), 6.50 (s, 2H), 4.30 – 4.14 (m, 8H).

$^{13}\text{C}\{^1\text{H}\}$  NMR (100 MHz,  $\text{CDCl}_3$ )  $\delta$  144.0, 138.5, 138.2, 117.7, 111.9, 107.3, 64.7, 64.4.  
HRMS (ESI)  $m/z$  calc. for  $\text{C}_{16}\text{H}_{16}\text{NO}_4$   $[\text{M}+\text{H}]^+$ : 286.1074, found: 286.1074.

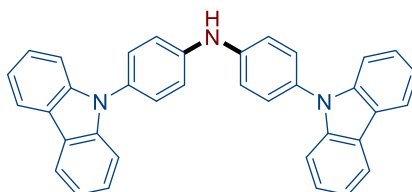

**Bis(4-(9H-carbazol-9-yl)phenyl)amine (71):** black oil;  $^1\text{H}$  NMR (400 MHz,  $\text{CDCl}_3$ )  $\delta$  8.22 (d,  $J = 7.8$  Hz, 4H), 7.63 – 7.45 (m, 13H), 7.37 – 7.34 (m,  $J = 7.9, 4.0$  Hz, 7H).  $^{13}\text{C}\{^1\text{H}\}$  NMR (100 MHz,  $\text{CDCl}_3$ )  $\delta$  142.6, 141.4, 130.9, 128.5, 126.0, 123.3, 120.4, 119.9, 118.9, 109.9. Spectral datas obtained for the compound are in good agreement with the reported datas.<sup>[21]</sup>

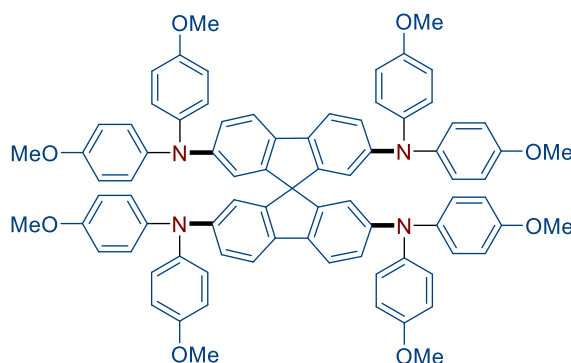

**N<sub>2</sub>,N<sub>2</sub>,N<sub>2'</sub>,N<sub>2'</sub>,N<sub>7</sub>,N<sub>7</sub>,N<sub>7'</sub>,N<sub>7'</sub>-Octakis(4-methoxyphenyl)-9,9'-spirobifluorene]-2,2',7,7'-tetraamine (74):** yellow solid;  $^1\text{H}$  NMR (400 MHz,  $\text{CDCl}_3$ )  $\delta$  7.36 (d,  $J = 8.2$  Hz, 4H), 6.92 (d,  $J = 8.9$  Hz, 16H), 6.81 – 6.75 (m, 20H), 6.56 (d,  $J = 1.7$  Hz, 4H), 3.77 (s, 24H).  $^{13}\text{C}\{^1\text{H}\}$  NMR (100 MHz,  $\text{CDCl}_3$ )  $\delta$  155.2, 150.2, 147.3, 141.7, 135.7, 125.2, 122.9, 119.9, 118.3, 114.6, 65.7, 55.6. Spectral datas obtained for the compound are in good agreement with the reported datas.<sup>[22]</sup>

## 5. References

- 1 H. Hu, A. M. Gilliam, F. Qu and K. H. Shaughnessy, Enolizable ketones as activators of palladium (II) precatalysts in amine arylation reactions, *ACS Catal.*, 2020, **10**, 4127-4135.
- 2 G. Song, J. Song, Q. Li, D.-Z. Nong, J. Dong, G. Li, J. Fan, C. Wang, J. Xiao and D. Xue, Werner Salt as Nickel and Ammonia Source for Photochemical Synthesis of Primary Aryl Amines, *Angew. Chem., Int. Ed.*, 2023.

- 3 N. Chandna, F. Kaur, S. Kumar, N. Jain, Glucose promoted facile reduction of azides to amines under aqueous alkaline conditions, *Green Chem.*, 2017, **19**, 4268-4271.
- 4 G. Manolikakes, C. Munoz Hernandez, M. A. Schade, A. Metzger and P. Knochel, Palladium-and nickel-catalyzed cross-couplings of unsaturated halides bearing relatively acidic protons with organozinc reagents, *J. Org. Chem.*, 2008, **73**, 8422-8436.
- 5 R. Ye, B. Yuan, J. Zhao, W. T. Ralston, C.-Y. Wu, E. Unel Barin, F. D. Toste and G. A. Somorjai, Metal Nanoparticles catalyzed selective carbon-carbon bond activation in the liquid phase, *J. Am. Chem. Soc.*, 2016, **138**, 8533-8537.
- 6 G. D. Vo and J. F. Hartwig, Palladium-catalyzed coupling of ammonia with aryl chlorides, bromides, iodides, and sulfonates: A general method for the preparation of primary arylamines, *J. Am. Chem. Soc.*, 2009, **131**, 11049-11061.
- 7 L. Jiang, X. Lu, H. Zhang, Y. Jiang and D. Ma, CuI/4-Hydroxy-L-proline as a more effective catalytic system for coupling of aryl bromides with N-boc hydrazine and aqueous ammonia, *J. Org. Chem.*, 2009, **74**, 4542-4546.
- 8 R. A. Green and J. F. Hartwig, Nickel-Catalyzed Amination of Aryl Chlorides with Ammonia or Ammonium Salts, *Angew. Chem. Int. Ed.*, 2015, **54**, 3768-3772.
- 9 C. W. Cheung, D. S. Surry and S. L. Buchwald, Mild and highly selective palladium-catalyzed monoarylation of ammonia enabled by the use of bulky biarylphosphine ligands and palladacycle precatalysts, *Org. Lett.*, 2013, **15**, 3734-3737.
- 10 J. Luo, A. Huang, Y. Y. Yang, X. Y. Ma, Q. L. Chen, J. Chen and Y. Wu, Pd/Co Catalyst with High Pd Atom Utilization Efficiency for Nitrobenzene Hydrogenation at Room Temperature: Experimental and DFT Studies, *Chem.-Eur. J.*, 2023, **29**, e202203142.
- 11 P. Kumar, S. Verma, K. Rathi, D. Chandra, V. Prakash Verma and J. L. Jat, Metal-Free Direct Transformation of Aryl Boronic Acid to Primary Amines, *Eur. J. Org. Chem.*, 2022, e202200508.
- 12 Y. Hagooley, O. Cohen and S. Rozen, A general route for constructing difluoromethyl ethers, *Tetrahedron Lett.*, 2009, **50**, 392-394.
- 13 A. Tlili, F. Monnier and M. Taillefer, Selective one-pot synthesis of symmetrical and unsymmetrical di- and triarylamines with a ligandless copper catalytic system, *Chem. Commun.*, 2012, **48**, 6408-6410.

- 14 K. Wang, Z. H. Deng, S. J. Xie, D. D. Zhai, H. Y. Fang and Z. J. Shi, Synthesis of arylamines and N-heterocycles by direct catalytic nitrogenation using N<sub>2</sub>, *Nat. Commun.*, 2021, **12**, 248.
- 15 J. J. Hanthorn, R. Amorati, L. Valgimigli and D. A. Pratt, The Reactivity of Air-Stable Pyridine- and Pyrimidine-Containing Diarylamine Antioxidants, *J. Org. Chem.*, 2012, **77**, 6895-6907.
- 16 Z. Hu, W. Fu, L. Yan, J. Miao, H. Yu, Y. He, O. Goto, H. Meng, H. Chen and W. Huang, Effects of heteroatom substitution in spiro-bifluorene hole transport materials, *Chemical Science.*, 2016, **7**, 5007-5012.
- 17 R. T. McGuire, J. F. J. Paffile, Y. Zhou and M. Stradiotto, Nickel-Catalyzed C–N Cross-Coupling of Ammonia, (Hetero)anilines, and Indoles with Activated (Hetero)aryl Chlorides Enabled by Ligand Design, *ACS Catal.*, 2019, **9**, 9292-9297.
- 18 C. Zhou, D. Yang, X. Jia, L. Zhang and J. Cheng, The Use of Hydroxylamine Hydrochloride in the Chan-Lam Reaction: A Simple Access to Symmetric Diarylamines, *Synlett.*, 2009, **19**, 3198-3200.
- 19 K. H. Hoi, S. Çalimsiz, R. D. Froese, A. C. Hopkinson and M. G. Organ, Amination with Pd-NHC Complexes: Rate and Computational Studies Involving Substituted Aniline Substrates, *Chem.–Eur. J.*, 2012, **18**, 145-151.
- 20 M. Soleiman-Beigi and F. Mohammadi, A green and mild procedure to selective synthesis of diarylamine via domino reaction of aryl halides and arginine catalyzed by magnetic-MOF, *Heteroatom Chem.*, 2018, **29**, 1-6.
- 21 K.-T. Wong, Y.-H. Lin, H.-H. Wu and F. Fungo, Synthesis and properties of dumbbell-shaped dendrimers containing 9-phenylcarbazole dendrons, *Org. Lett.*, 2007, **9**, 4531-4534.
- 22 N. J. Jeon, H. G. Lee, Y. C. Kim, J. Seo, J. H. Noh, J. Lee and S. I. Seok, o-Methoxy substituents in spiro-OMeTAD for efficient inorganic–organic hybrid perovskite solar cells, *J. Am. Chem. Soc.*, 2014, **136**, 7837-7840.

## 6. Copies of $^1\text{H}$ NMR, $^{13}\text{C}$ NMR and $^{19}\text{F}$ NMR spectra of products

$^1\text{H}$  NMR (400 MHz,  $\text{CDCl}_3$ ) spectrum of compound **4**

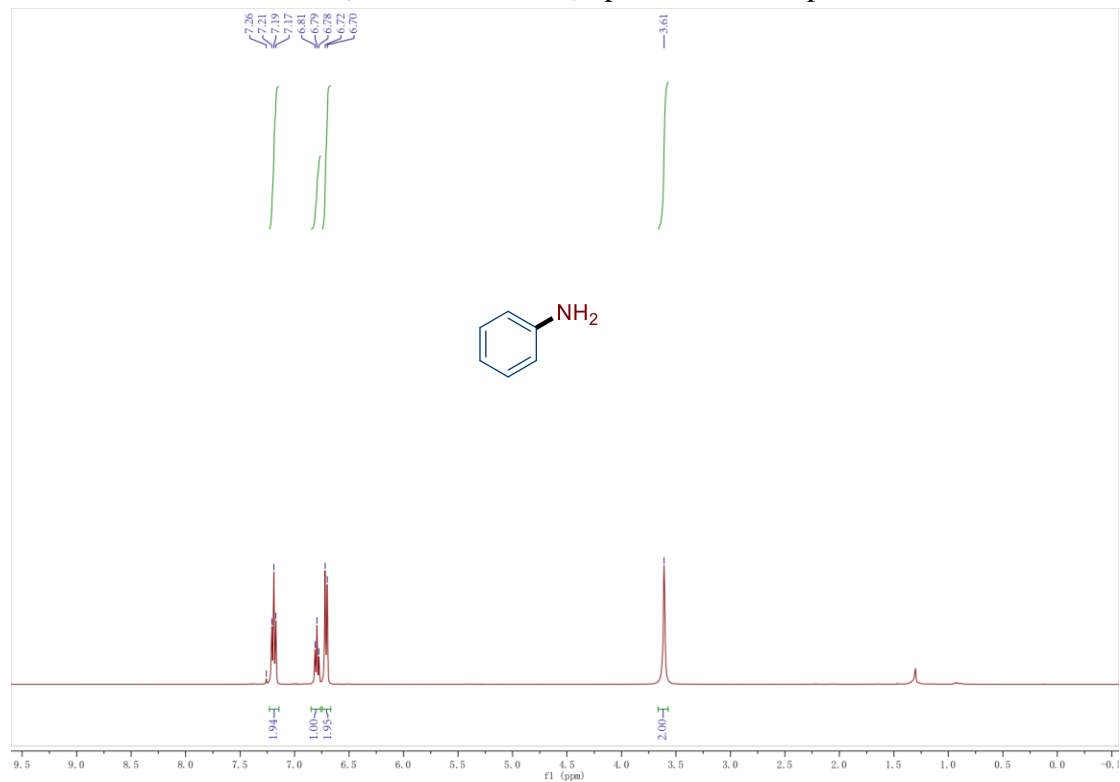

$^{13}\text{C}\{^1\text{H}\}$  NMR (100 MHz,  $\text{CDCl}_3$ ) spectrum of compound **4**

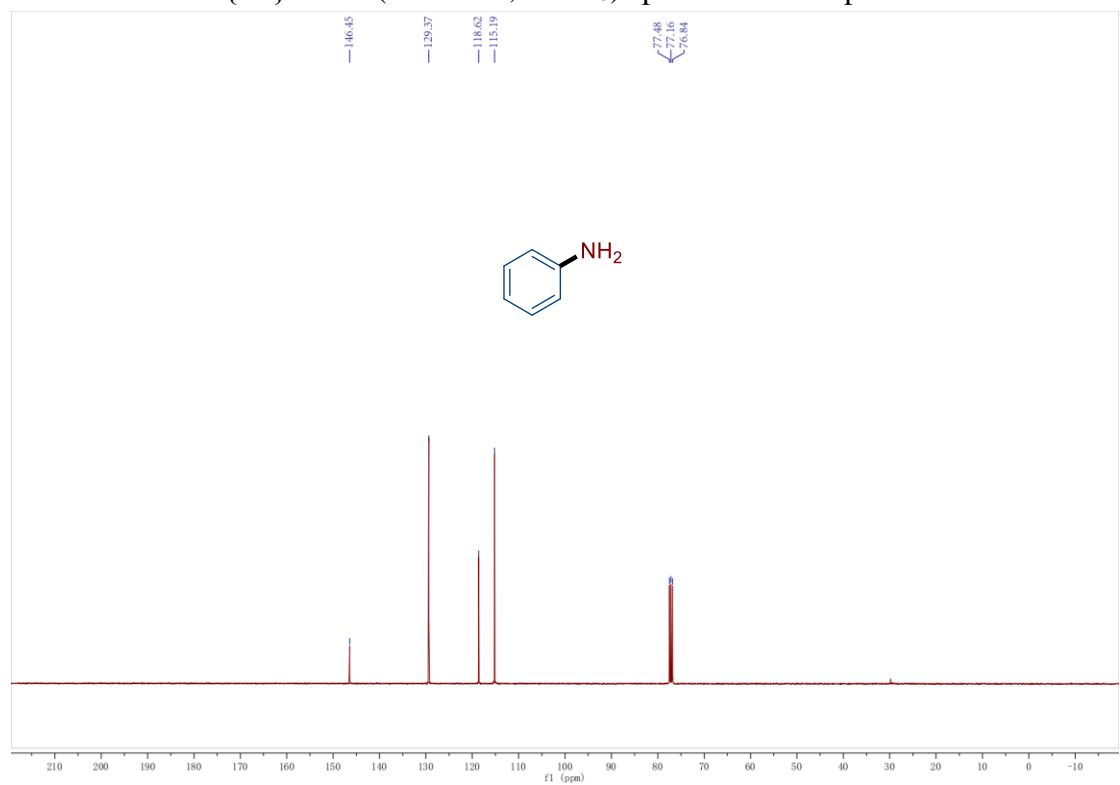

$^1\text{H}$  NMR (400 MHz,  $\text{CDCl}_3$ ) spectrum of compound **5**

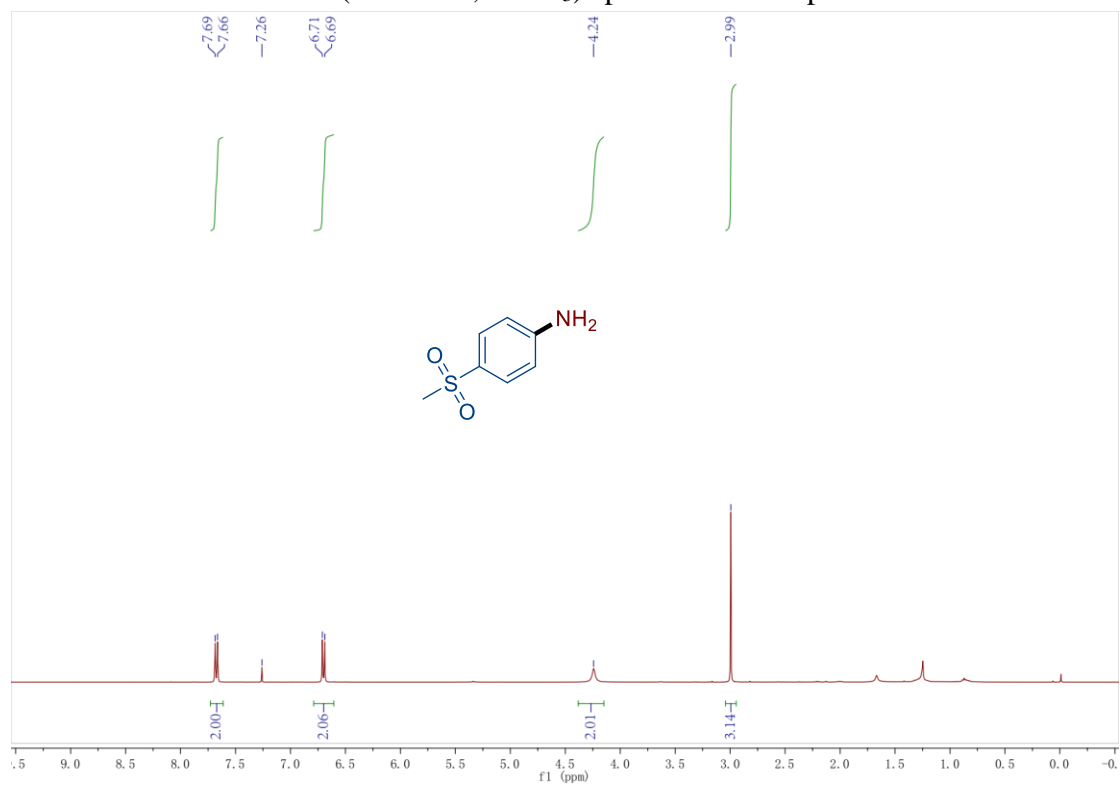

$^{13}\text{C}\{^1\text{H}\}$  NMR (100 MHz,  $\text{CDCl}_3$ ) spectrum of compound **5**

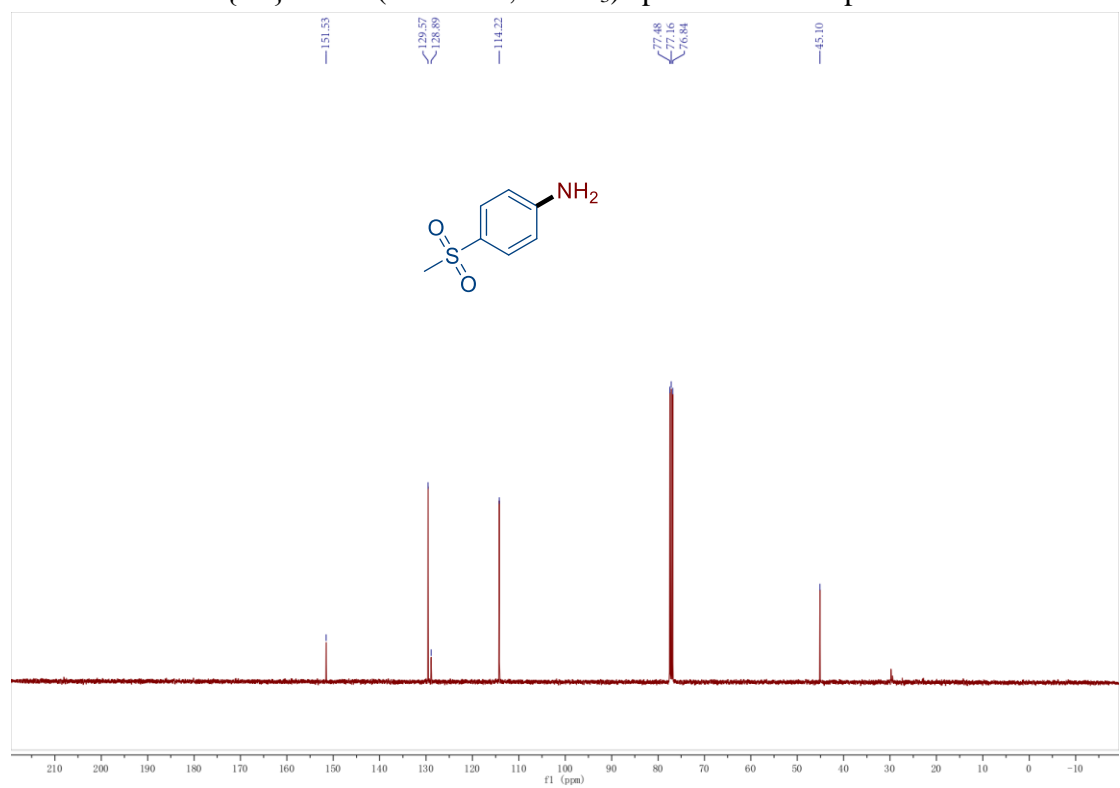



$^1\text{H}$  NMR (400 MHz,  $\text{DMSO-}d_6$ ) spectrum of compound **6**

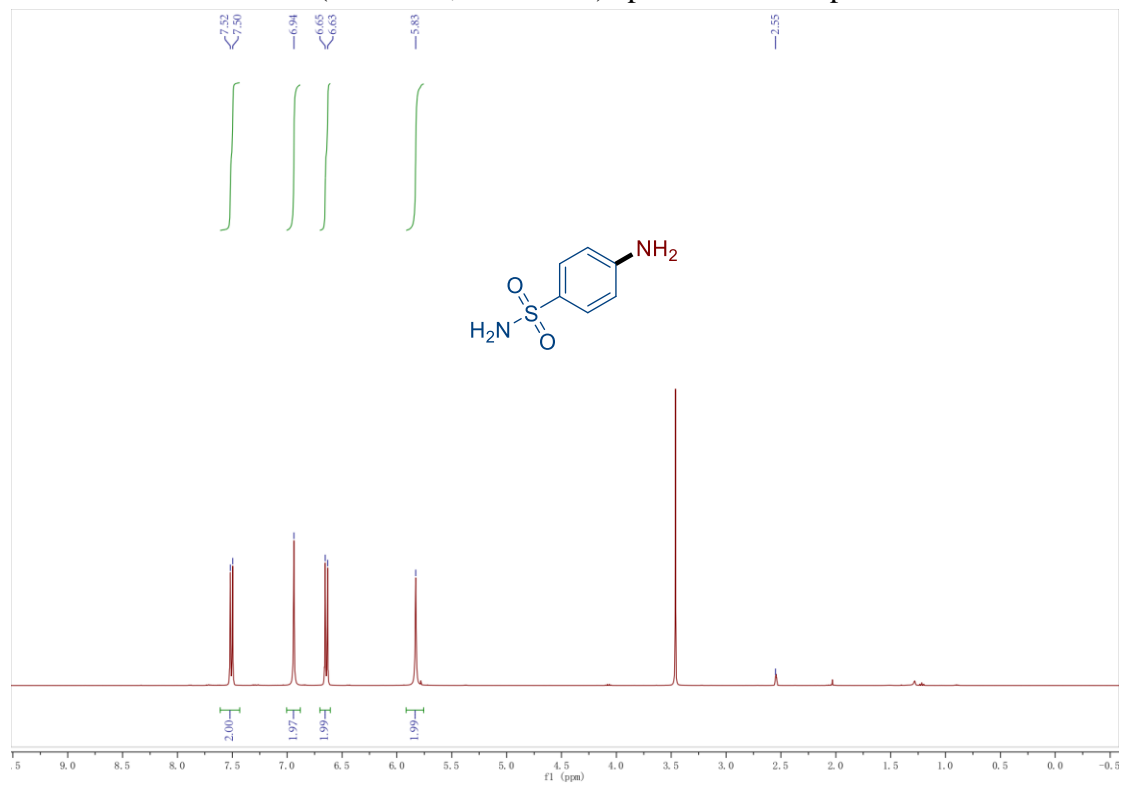

$^{13}\text{C}\{^1\text{H}\}$  NMR (100 MHz,  $\text{DMSO-}d_6$ ) spectrum of compound **6**

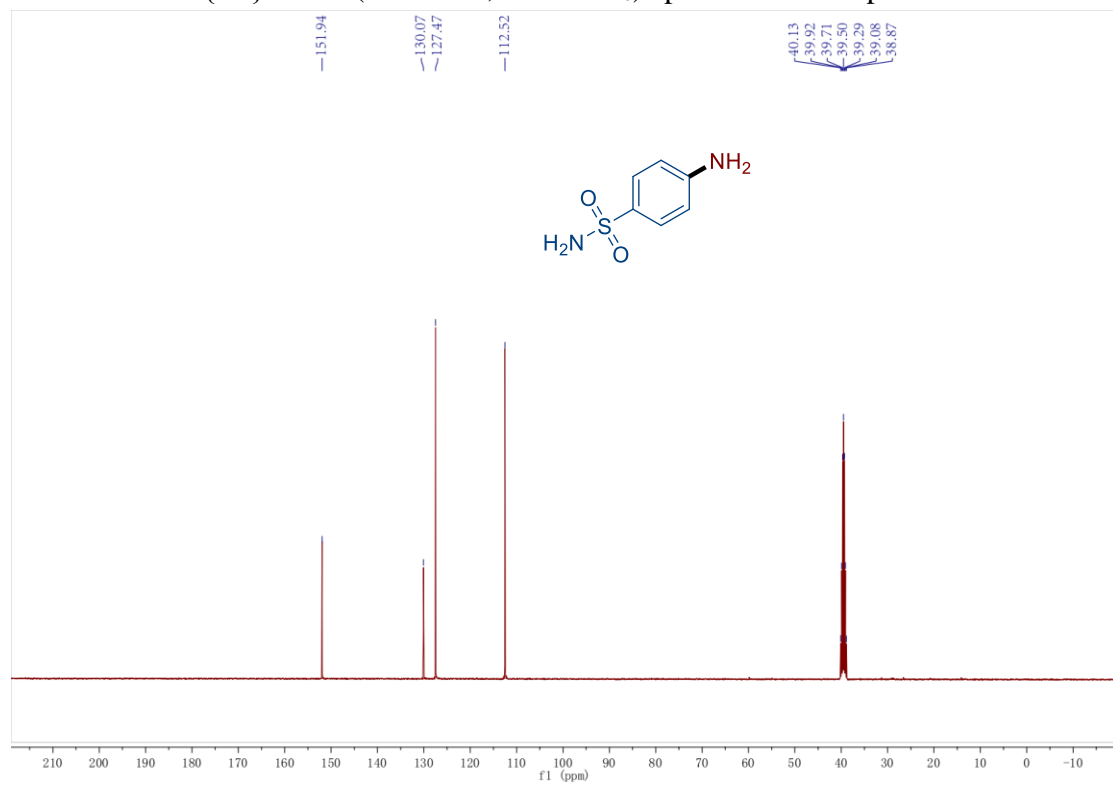

$^1\text{H}$  NMR (400 MHz,  $\text{CDCl}_3$ ) spectrum of compound **7**

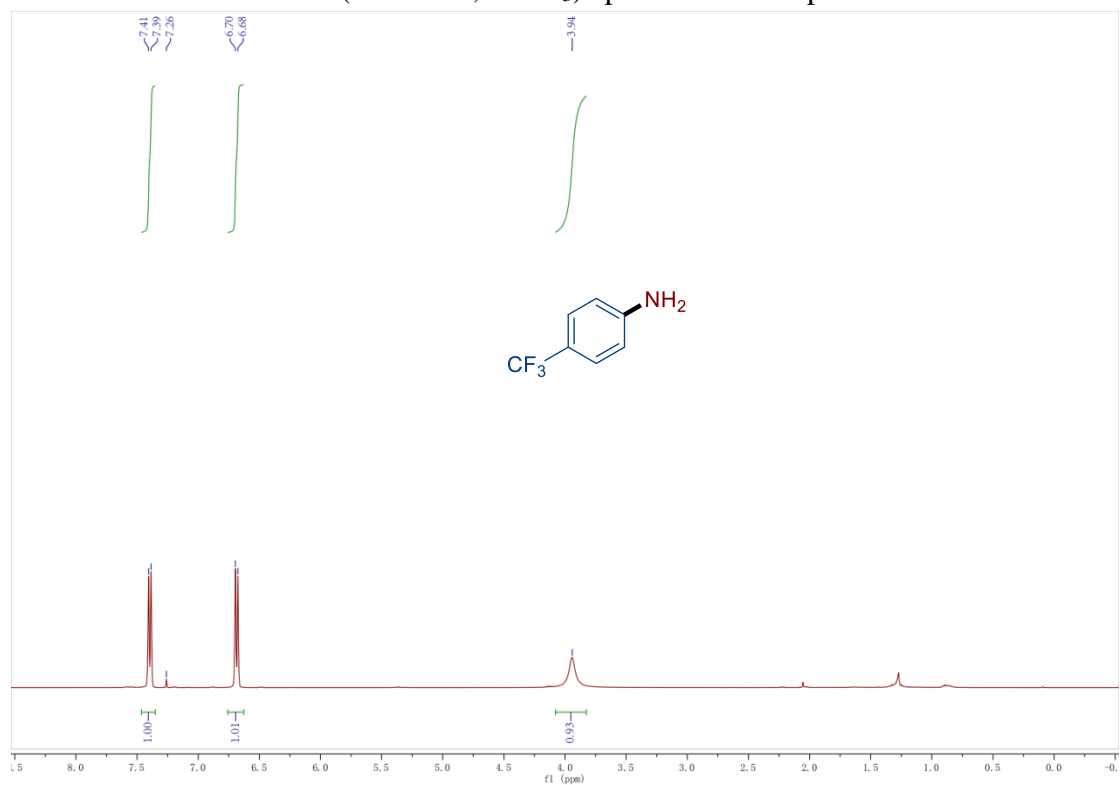

$^{13}\text{C}\{^1\text{H}\}$  NMR (100 MHz,  $\text{CDCl}_3$ ) spectrum of compound **7**

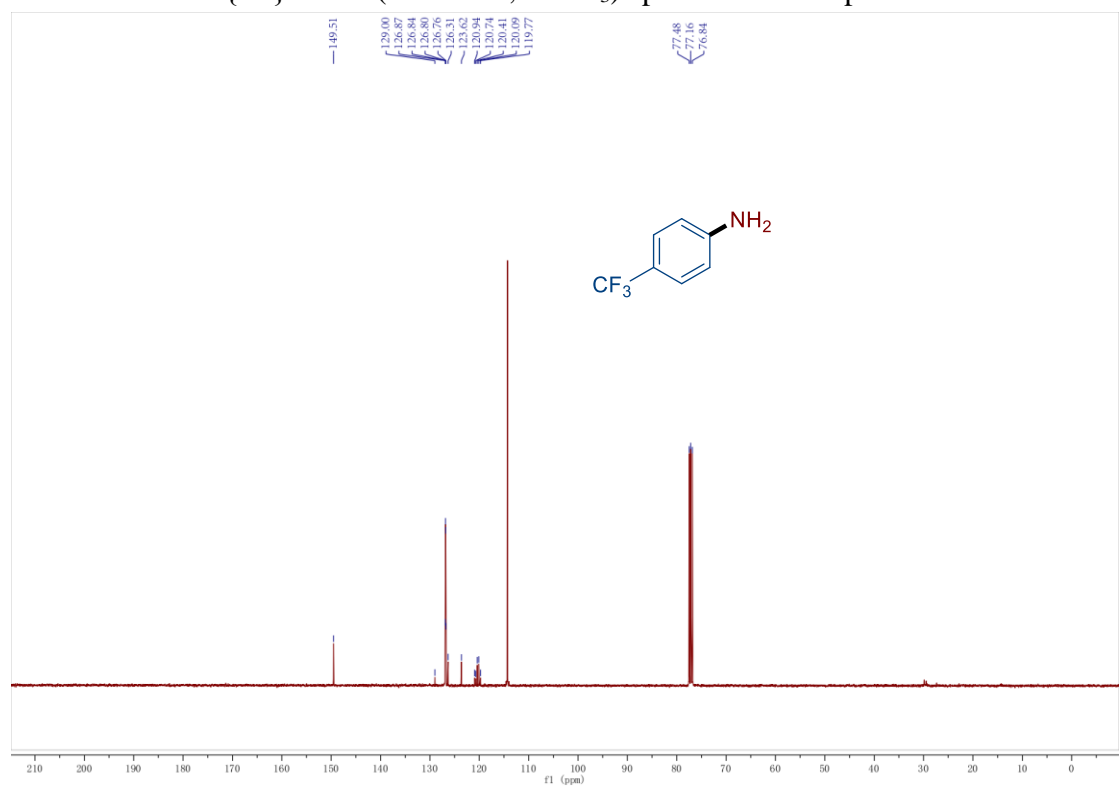

$^{19}\text{F}$  NMR (376 MHz,  $\text{CDCl}_3$ ) spectrum of compound **7**

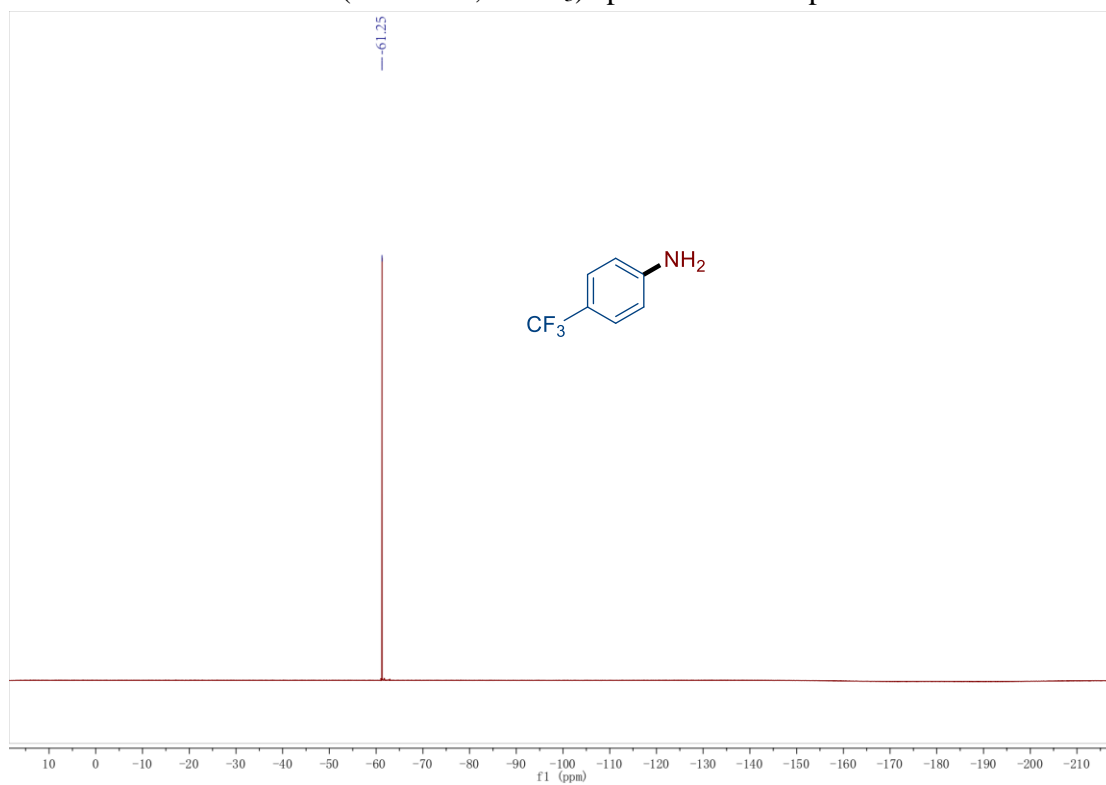

$^1\text{H}$  NMR (400 MHz,  $\text{CDCl}_3$ ) spectrum of compound **8**

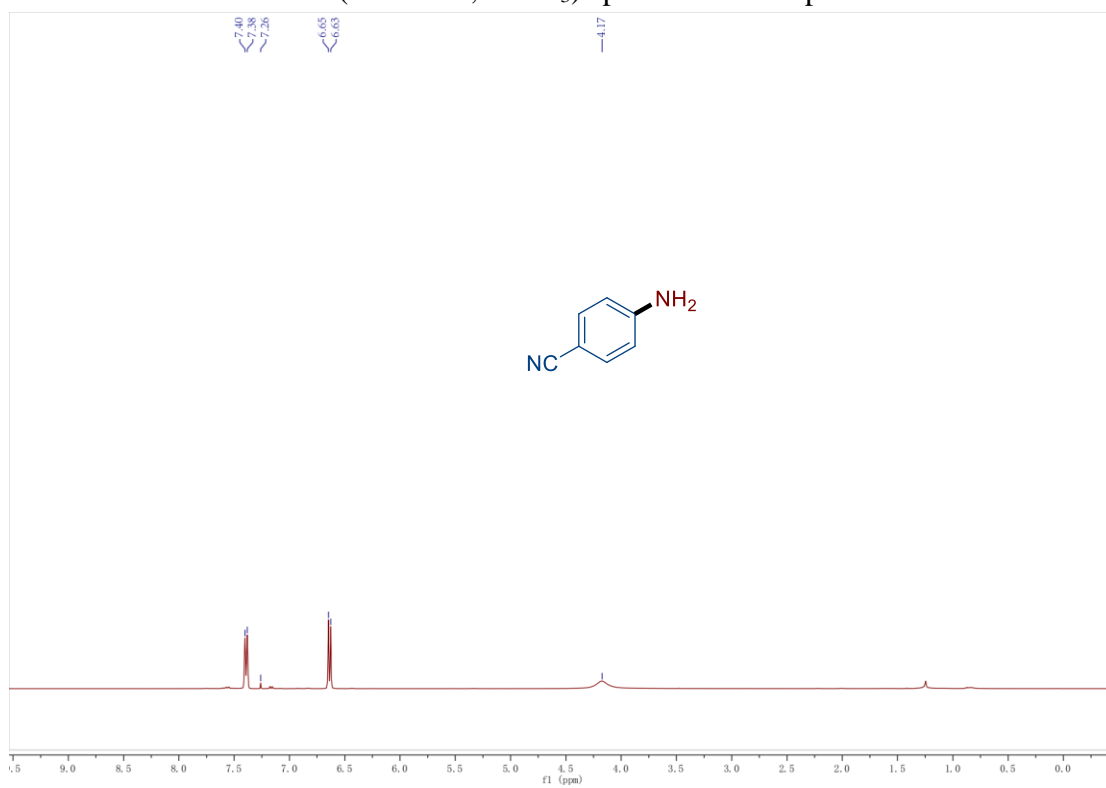

$^{13}\text{C}\{^1\text{H}\}$  NMR (100 MHz,  $\text{CDCl}_3$ ) spectrum of compound **8**

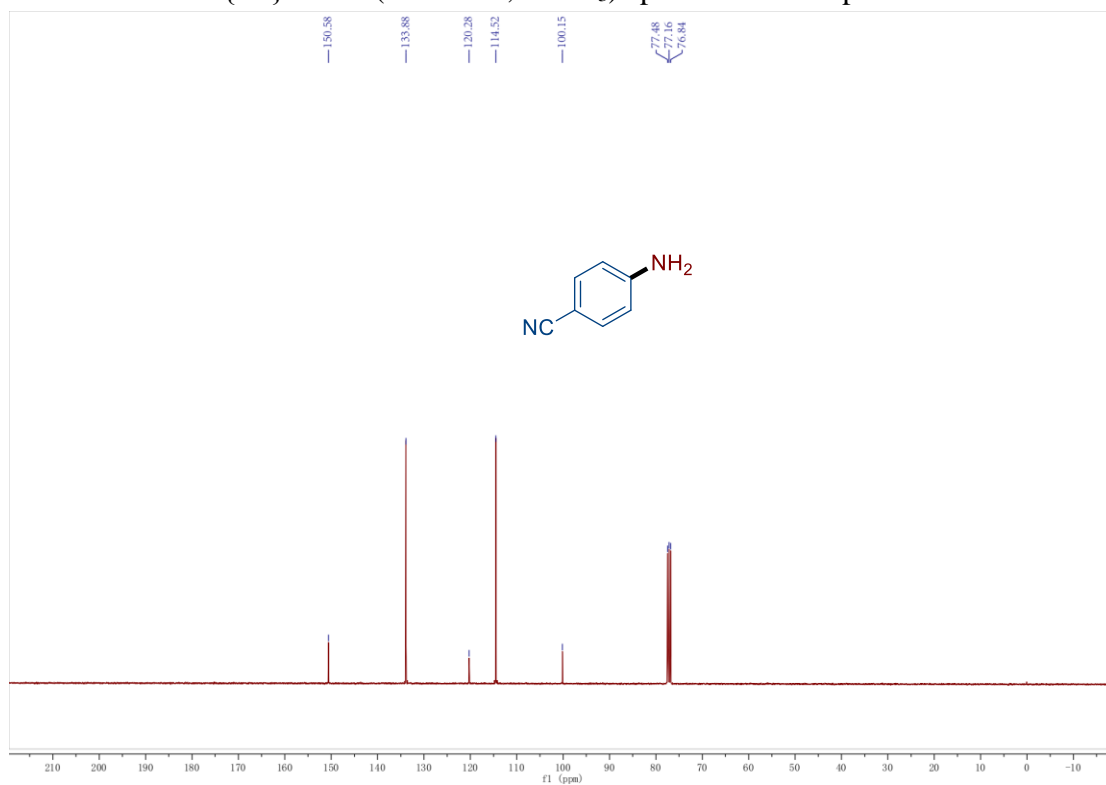

$^1\text{H}$  NMR (400 MHz,  $\text{CDCl}_3$ ) spectrum of compound **9**

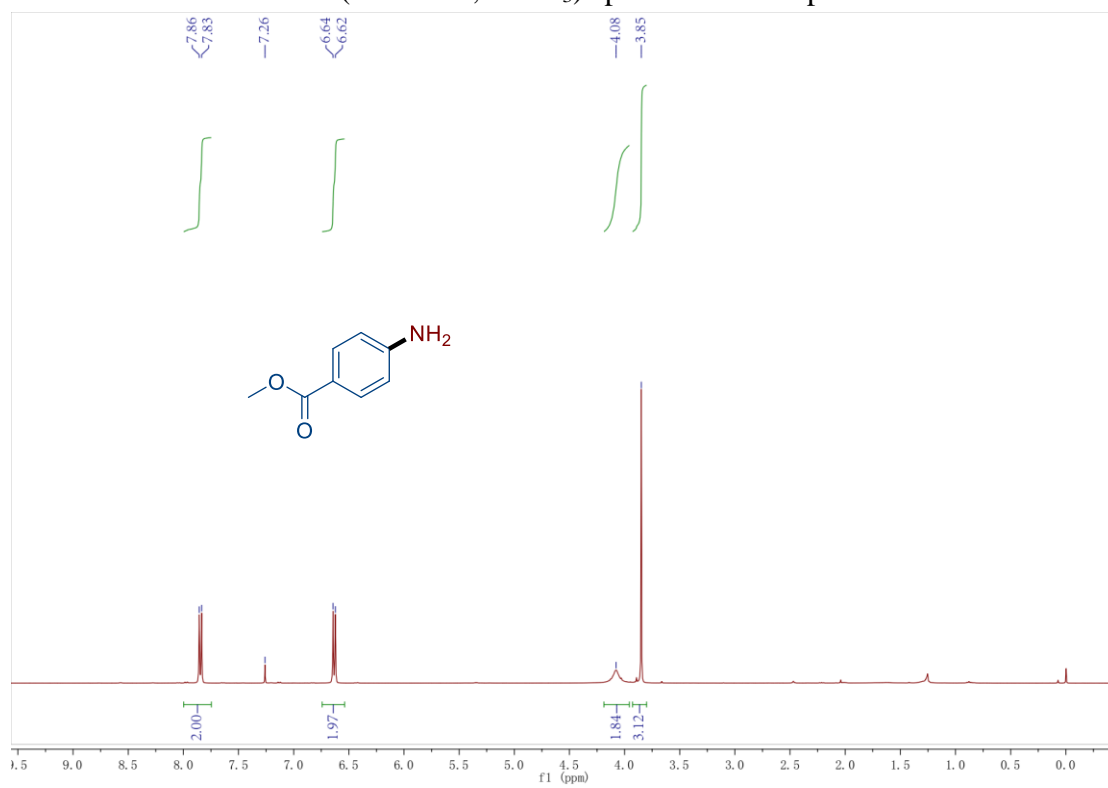

$^{13}\text{C}\{^1\text{H}\}$  NMR (100 MHz,  $\text{CDCl}_3$ ) spectrum of compound **9**

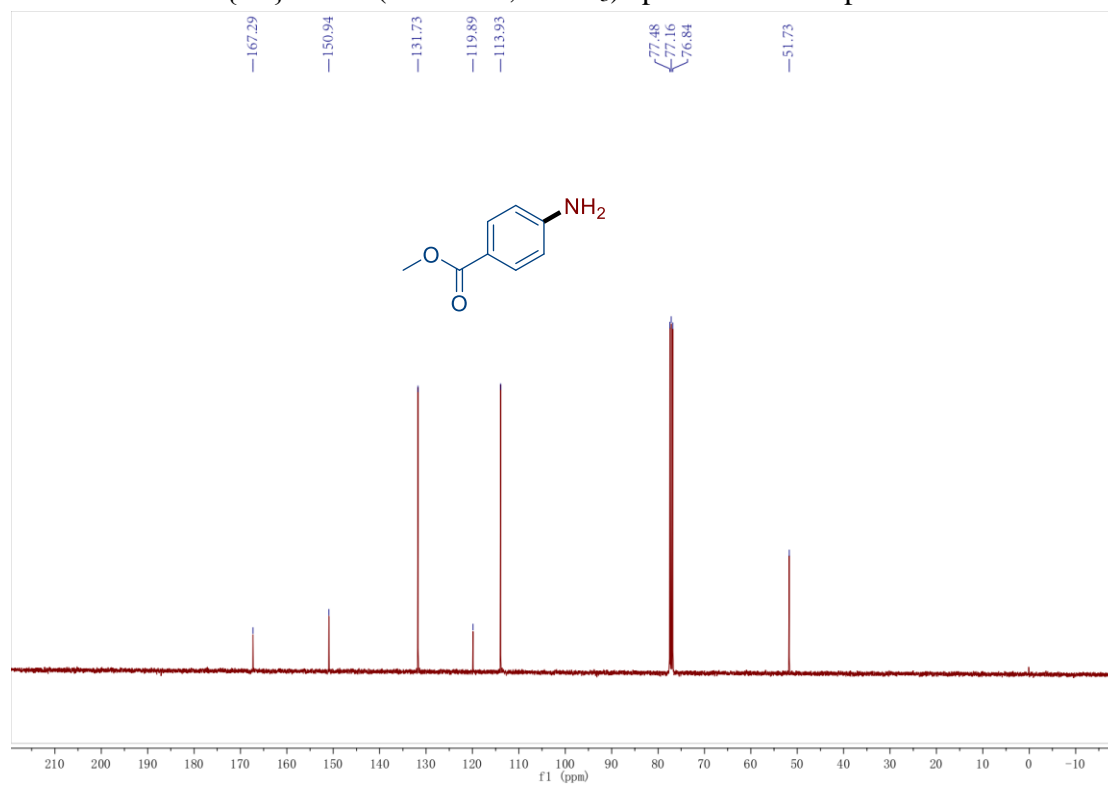

$^1\text{H}$  NMR (400 MHz,  $\text{CDCl}_3$ ) spectrum of compound **10**

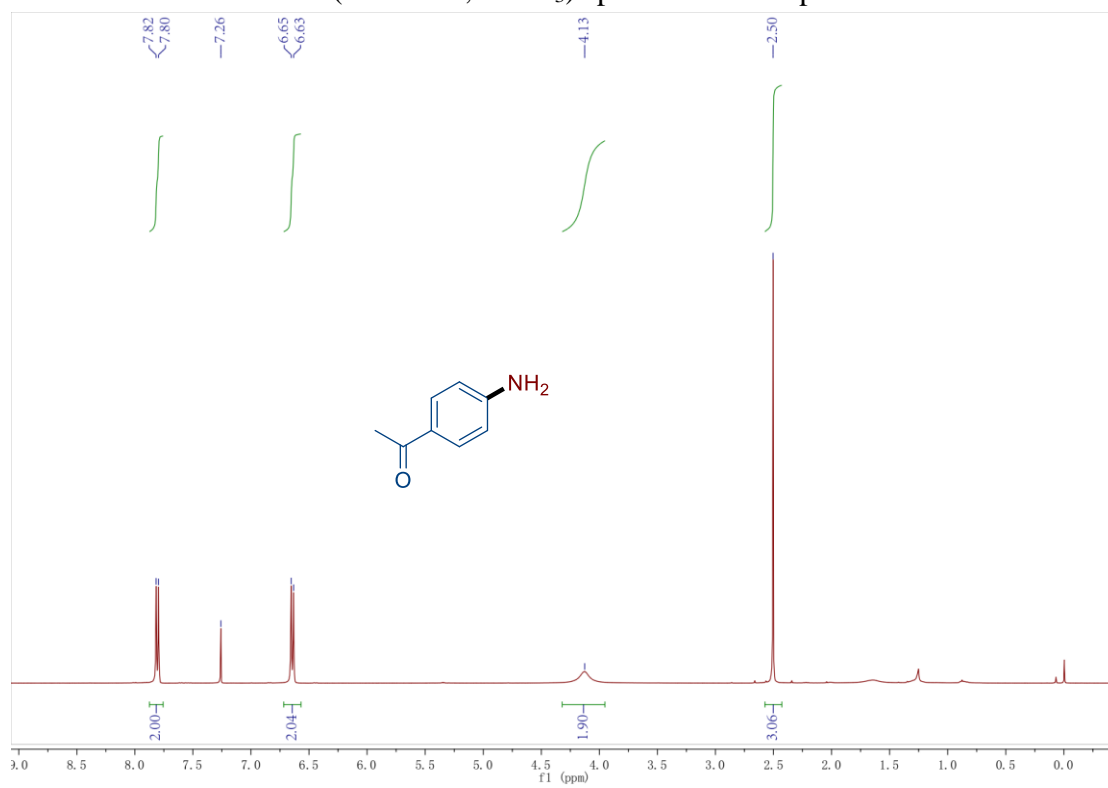

$^{13}\text{C}\{^1\text{H}\}$  NMR (100 MHz,  $\text{CDCl}_3$ ) spectrum of compound **10**

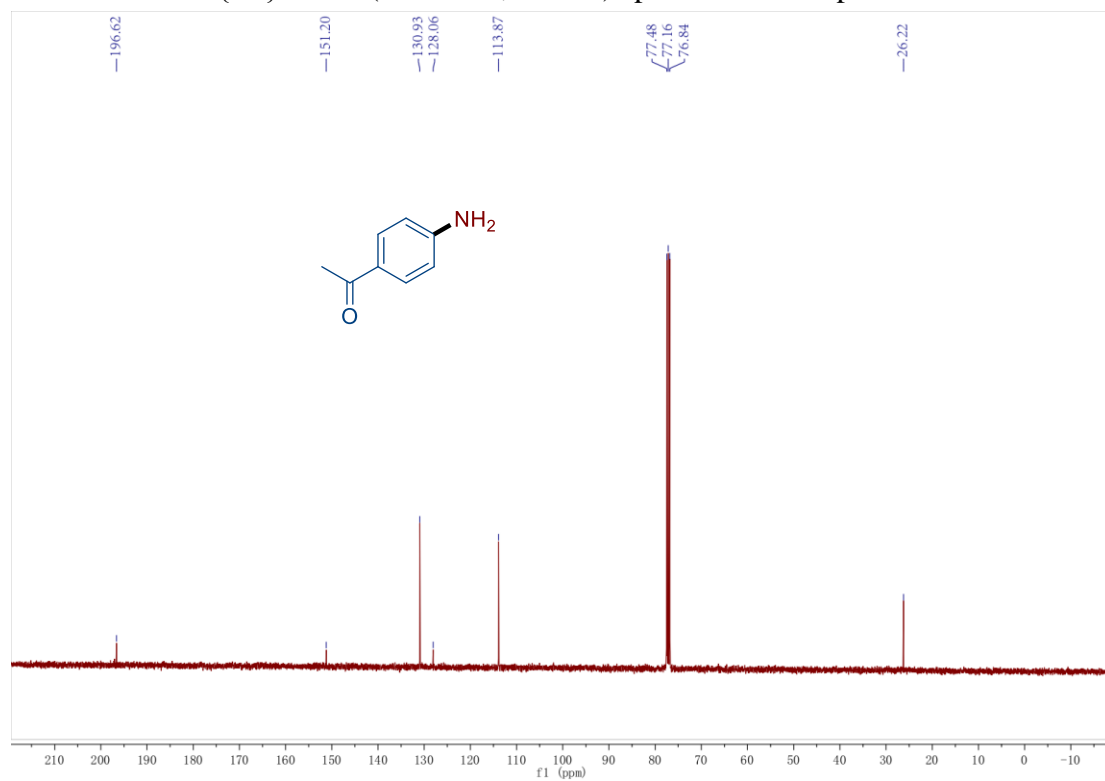

$^1\text{H}$  NMR (400 MHz,  $\text{DMSO}-d_6$ ) spectrum of compound **11**

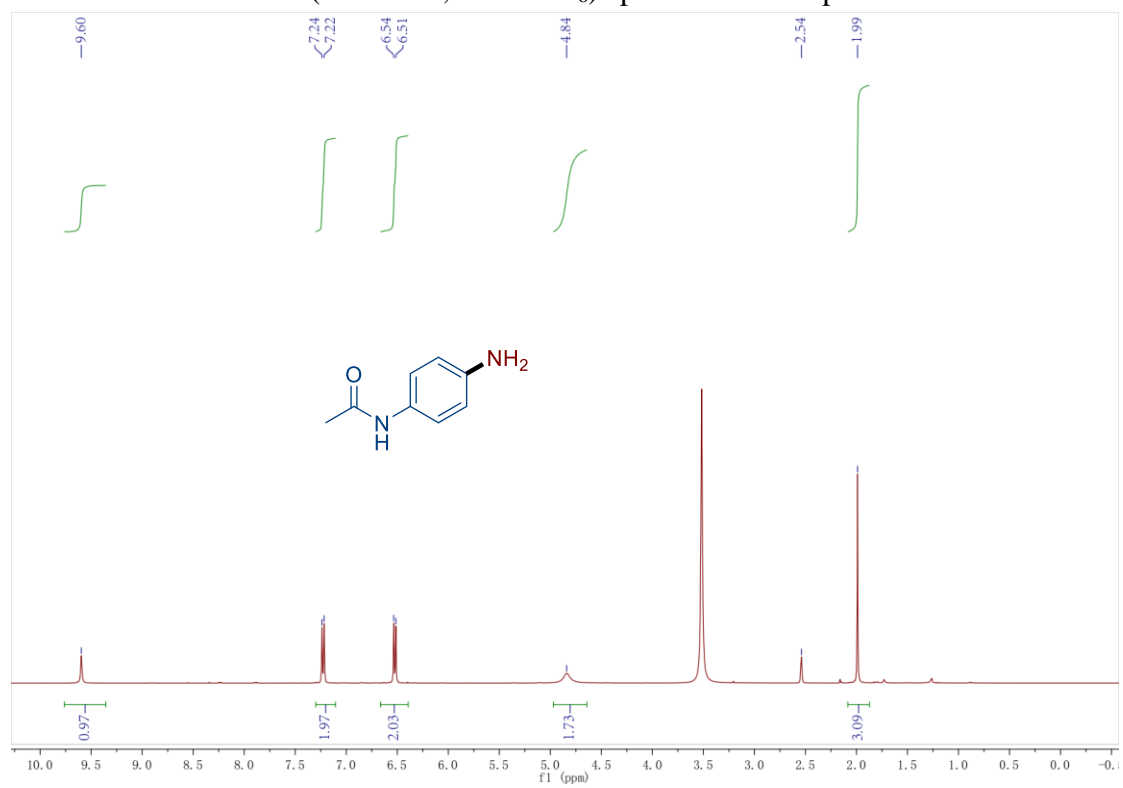

$^{13}\text{C}\{^1\text{H}\}$  NMR (100 MHz,  $\text{DMSO-}d_6$ ) spectrum of compound **11**

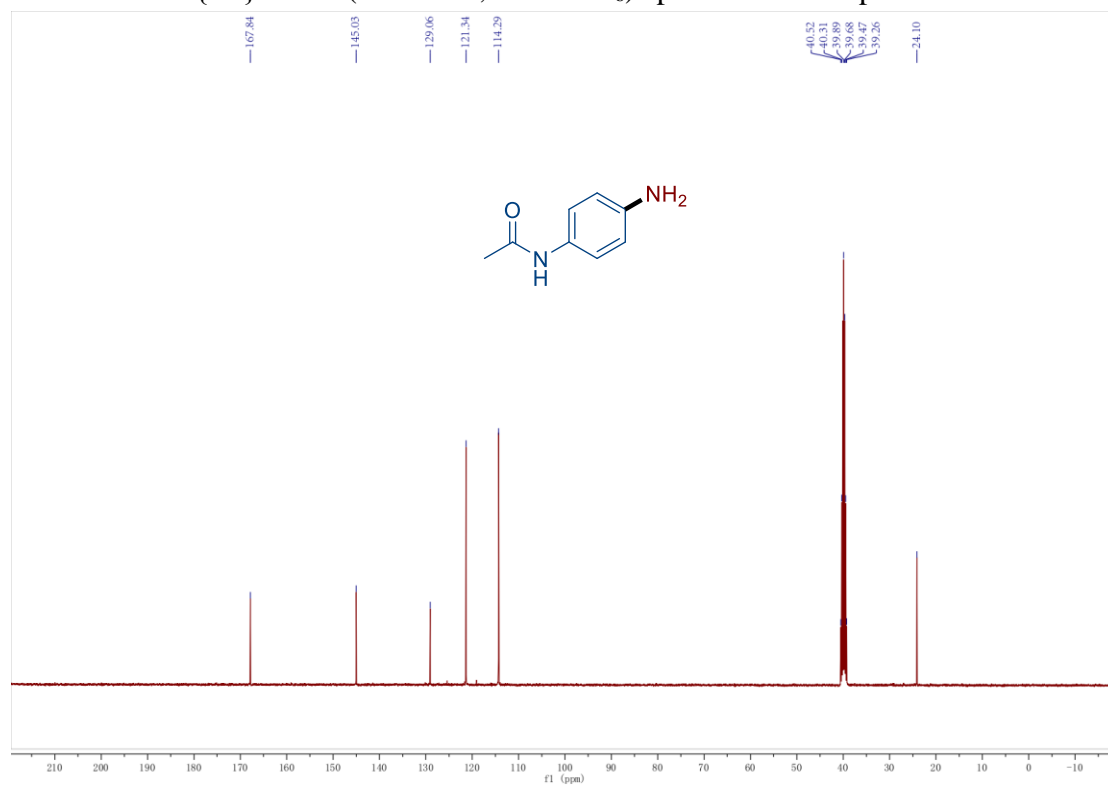

$^1\text{H}$  NMR (400 MHz,  $\text{CDCl}_3$ ) spectrum of compound **12**

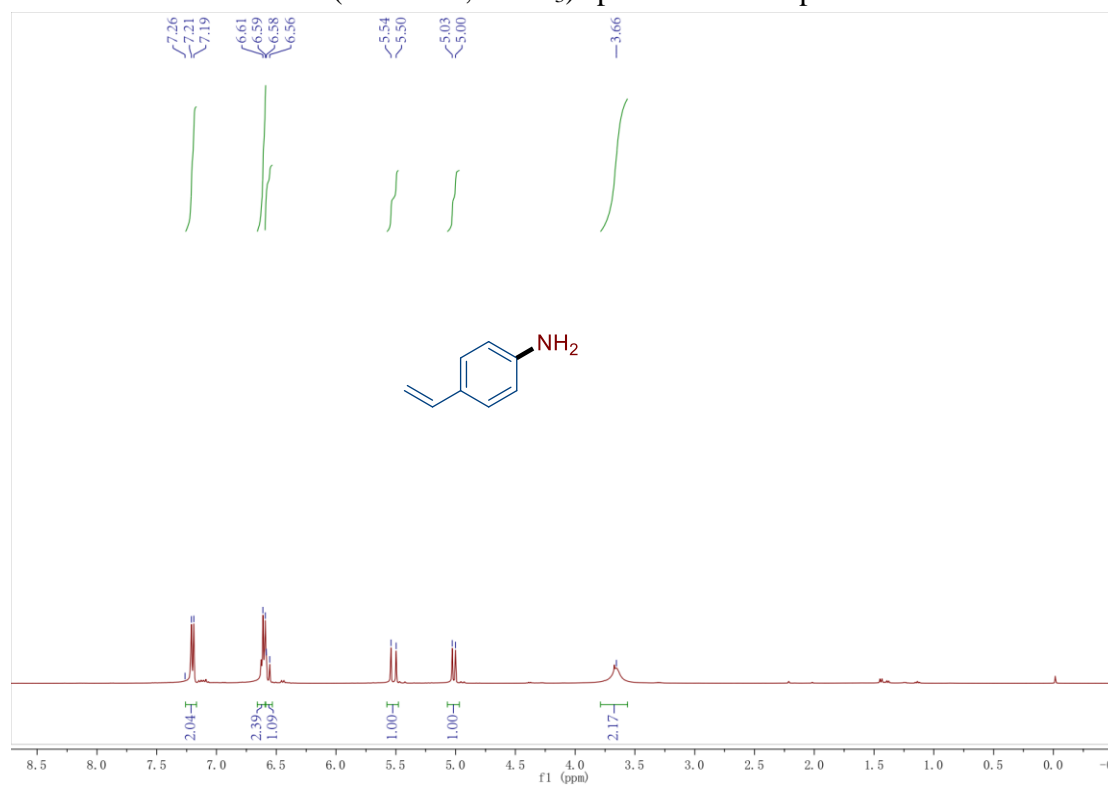

$^{13}\text{C}\{^1\text{H}\}$  NMR (100 MHz,  $\text{CDCl}_3$ ) spectrum of compound **12**

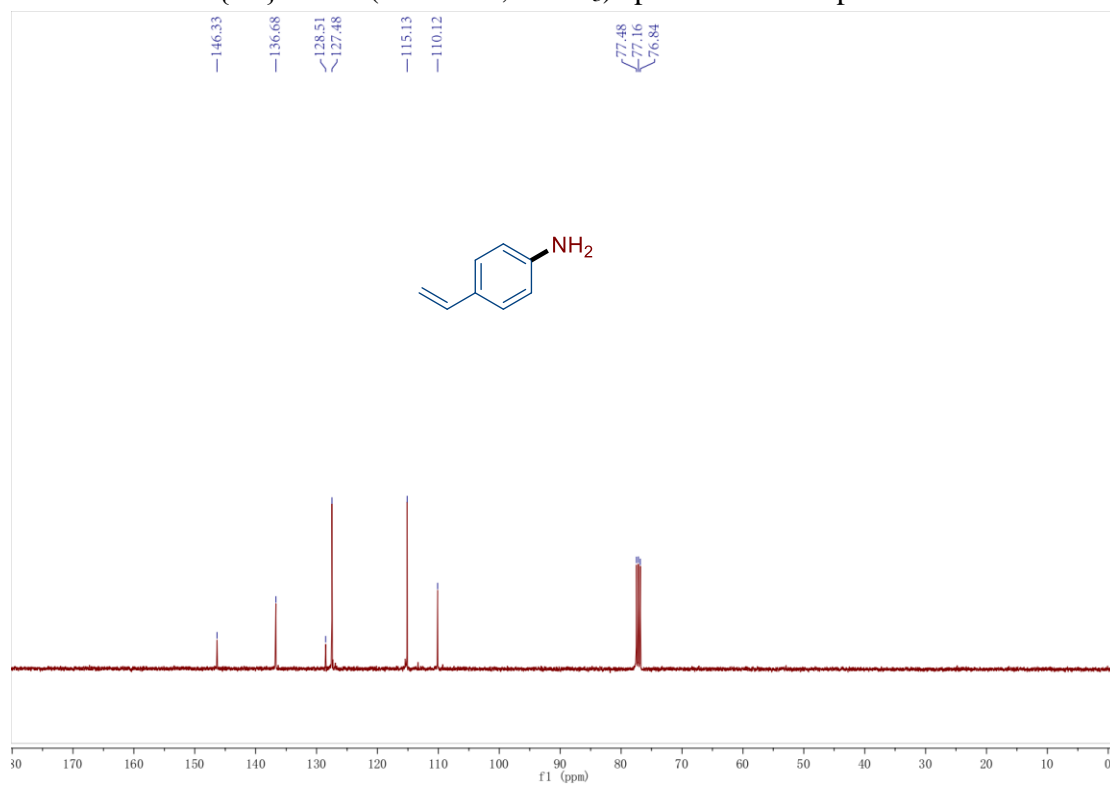

$^1\text{H}$  NMR (400 MHz,  $\text{CDCl}_3$ ) spectrum of compound **13**

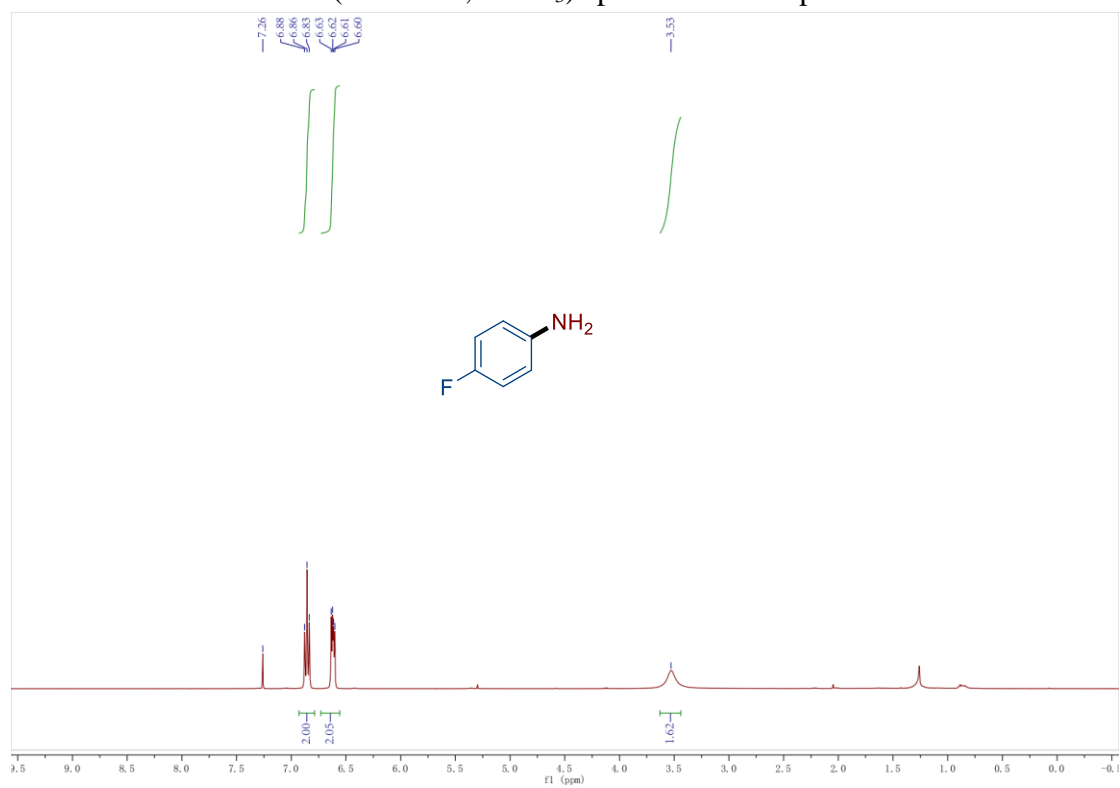



$^{13}\text{C}\{^1\text{H}\}$  NMR (100 MHz,  $\text{CDCl}_3$ ) spectrum of compound **13**

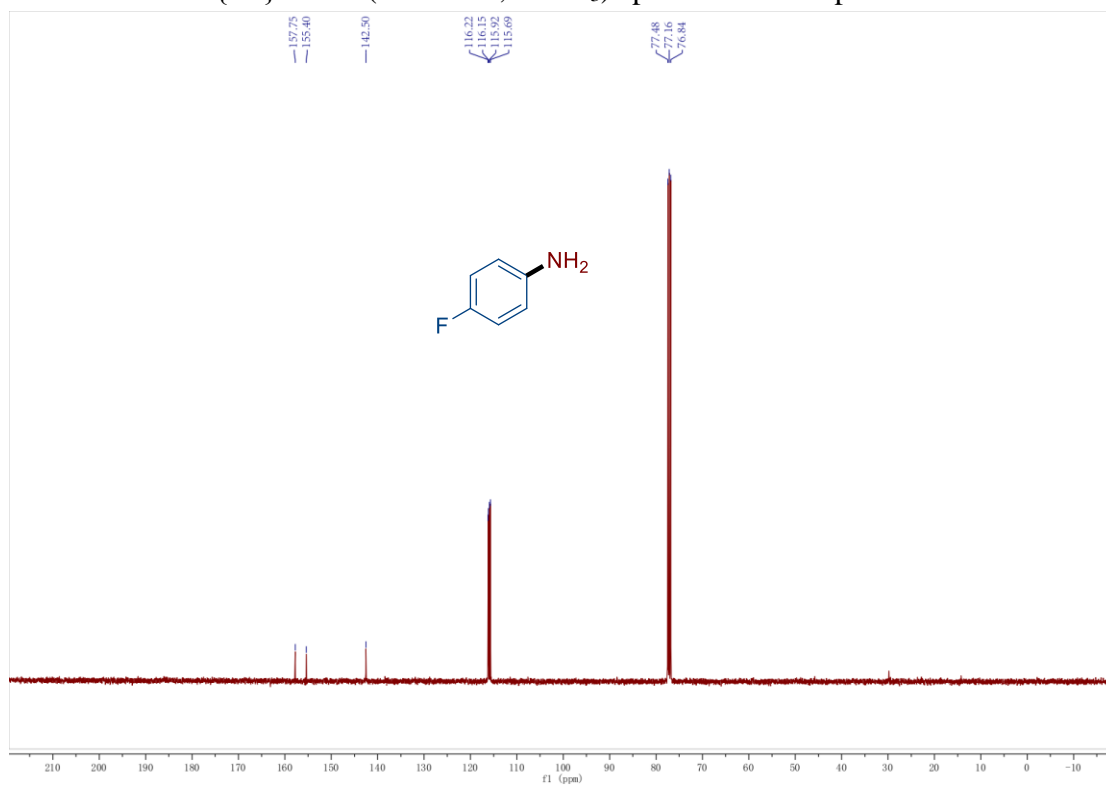

$^{19}\text{F}$  NMR (376 MHz,  $\text{CDCl}_3$ ) spectrum of compound **13**

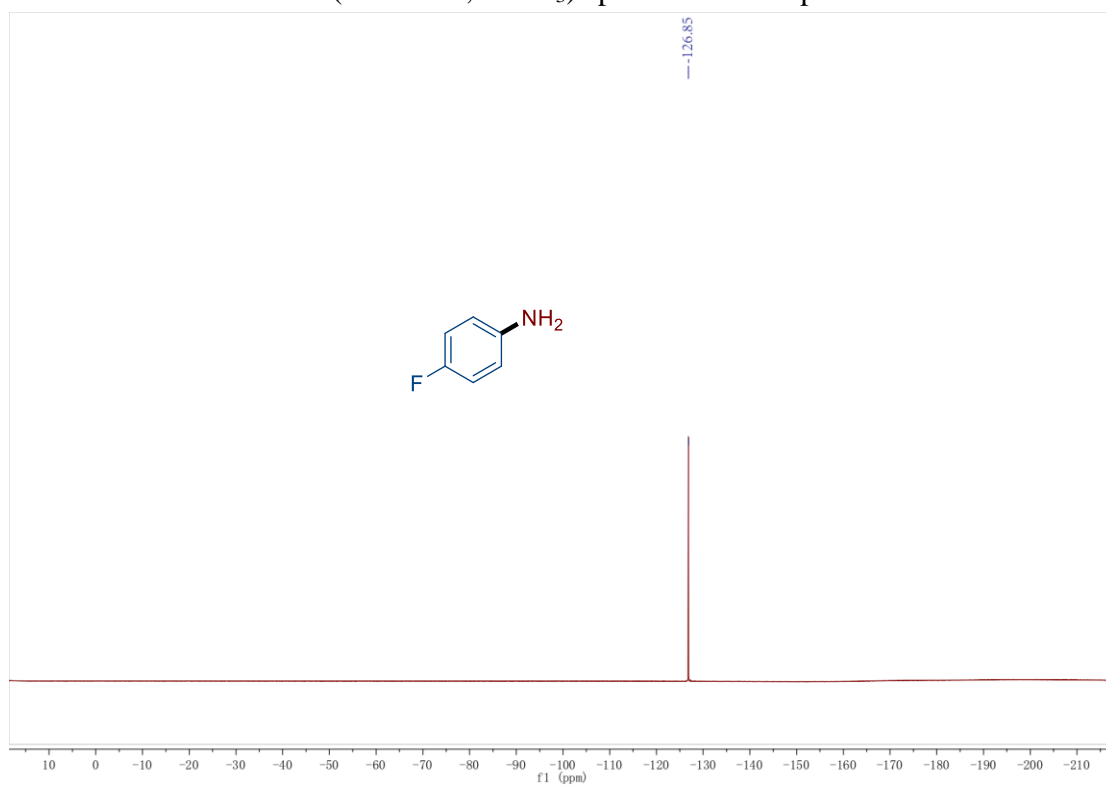

$^1\text{H}$  NMR (400 MHz,  $\text{CDCl}_3$ ) spectrum of compound **14**

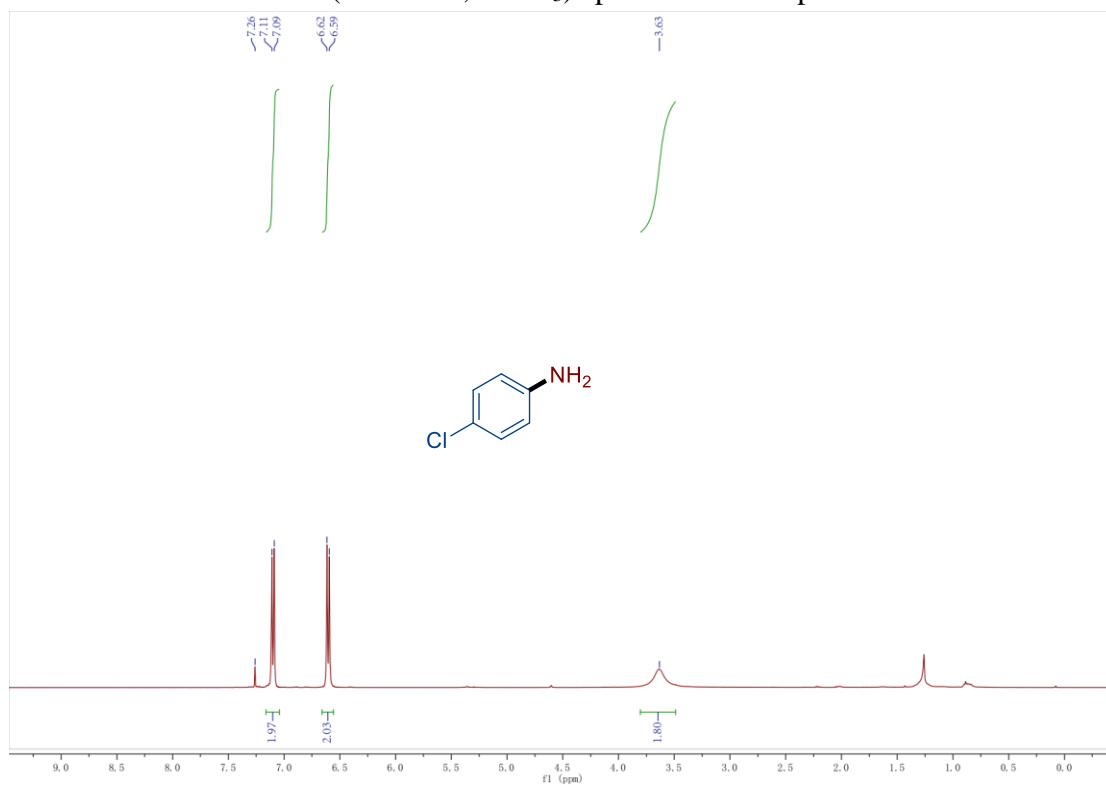

$^{13}\text{C}\{^1\text{H}\}$  NMR (100 MHz,  $\text{CDCl}_3$ ) spectrum of compound **14**

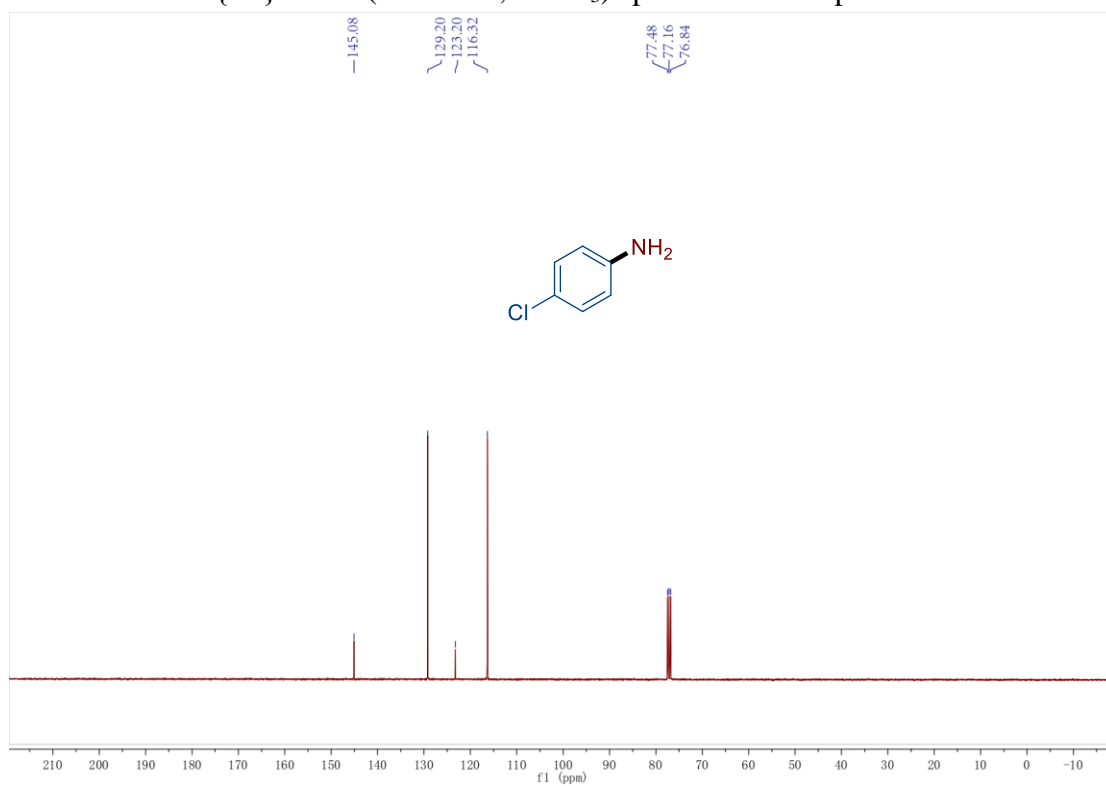

$^1\text{H}$  NMR (400 MHz,  $\text{CDCl}_3$ ) spectrum of compound **15**

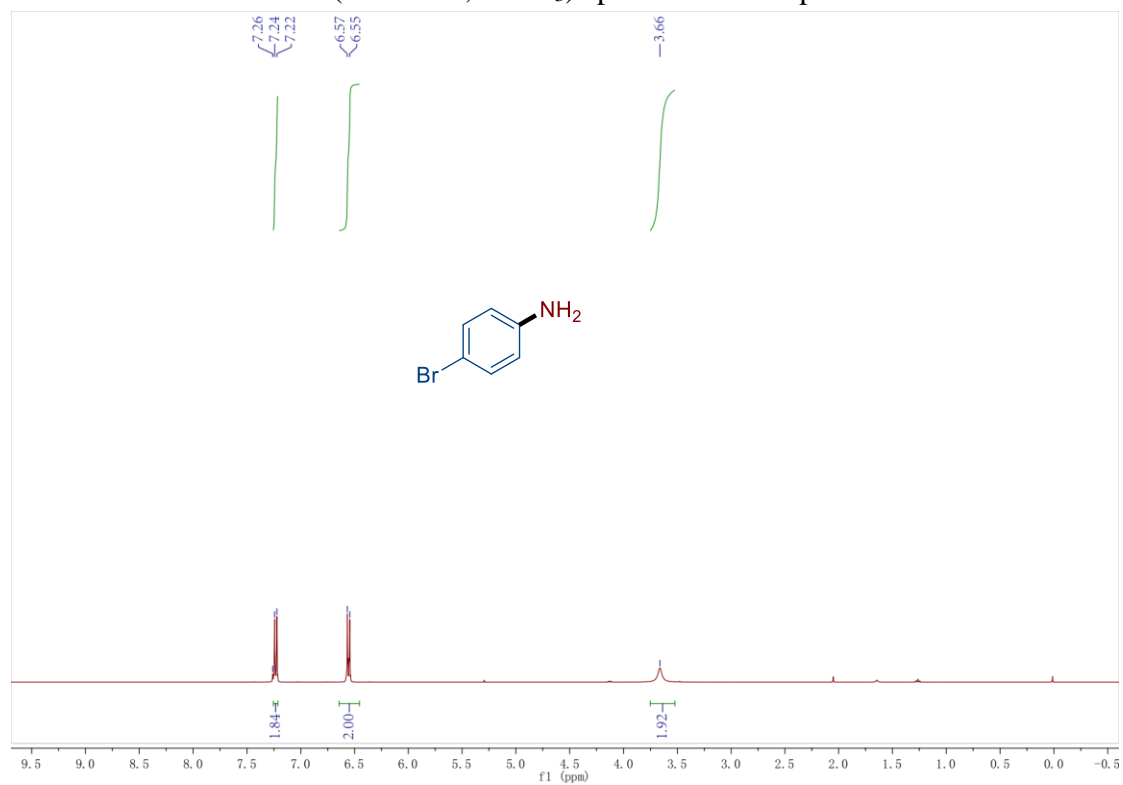

$^{13}\text{C}\{^1\text{H}\}$  NMR (100 MHz,  $\text{CDCl}_3$ ) spectrum of compound **15**

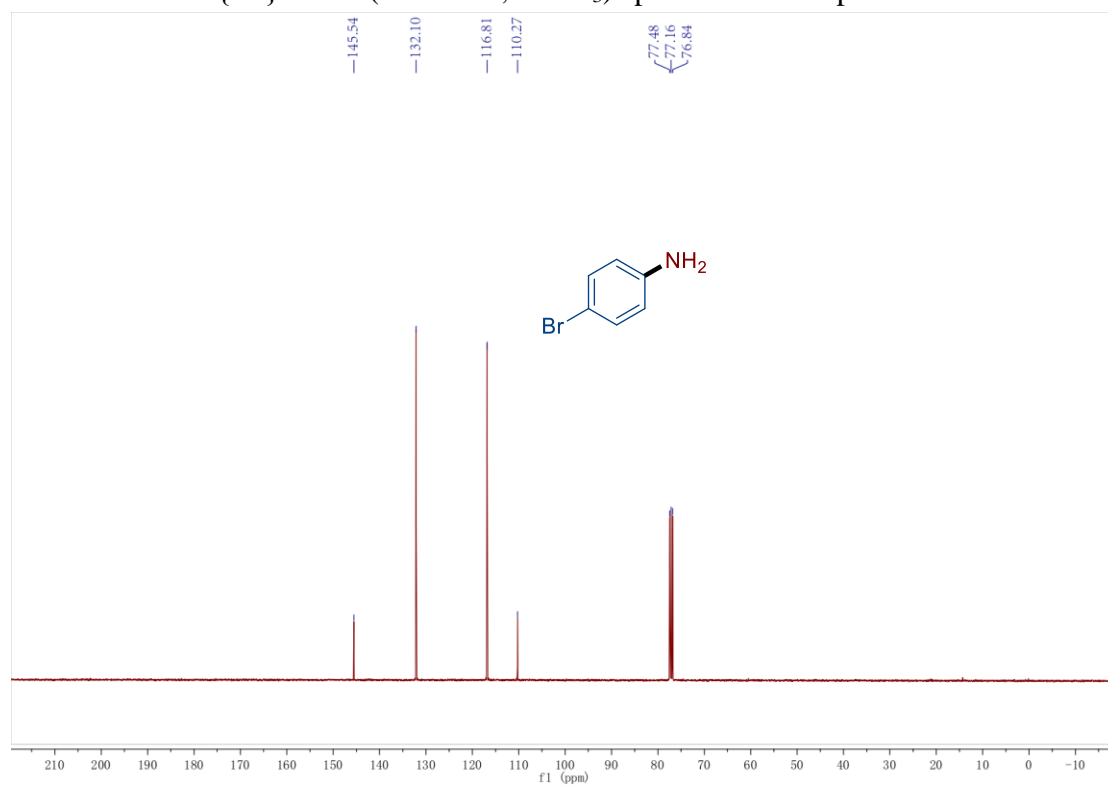

$^1\text{H}$  NMR (400 MHz,  $\text{CDCl}_3$ ) spectrum of compound **16**

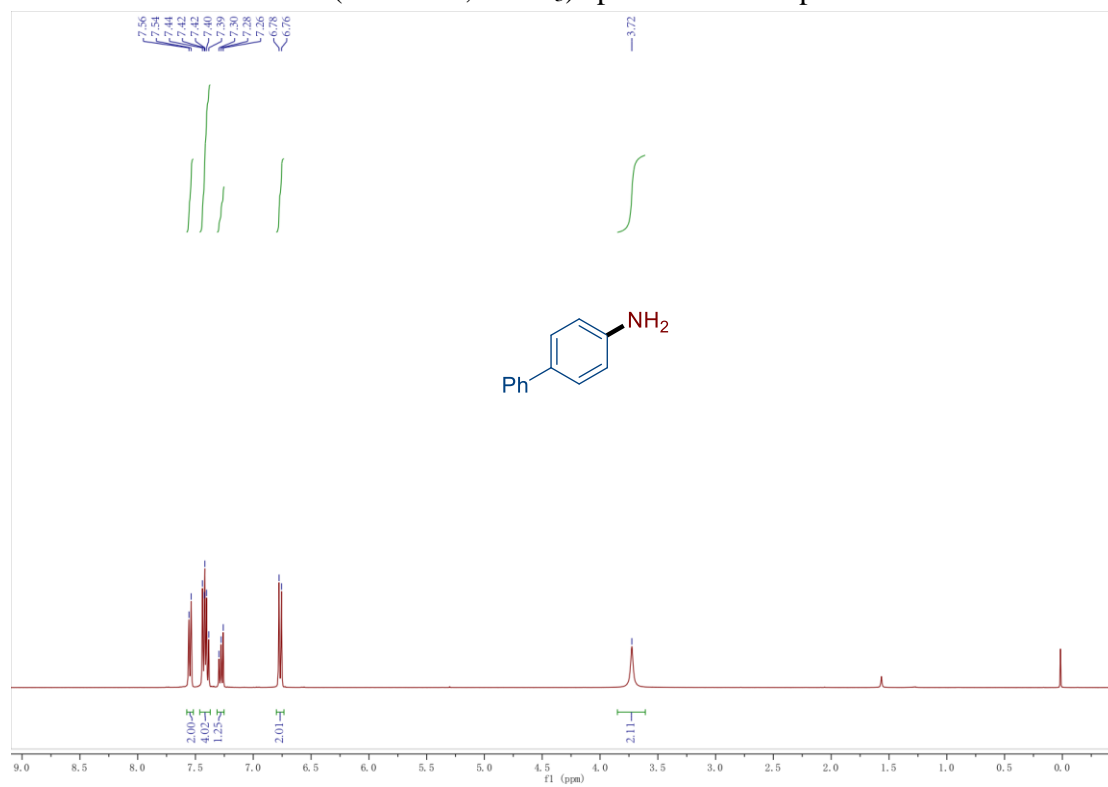

$^{13}\text{C}\{^1\text{H}\}$  NMR (100 MHz,  $\text{CDCl}_3$ ) spectrum of compound **16**

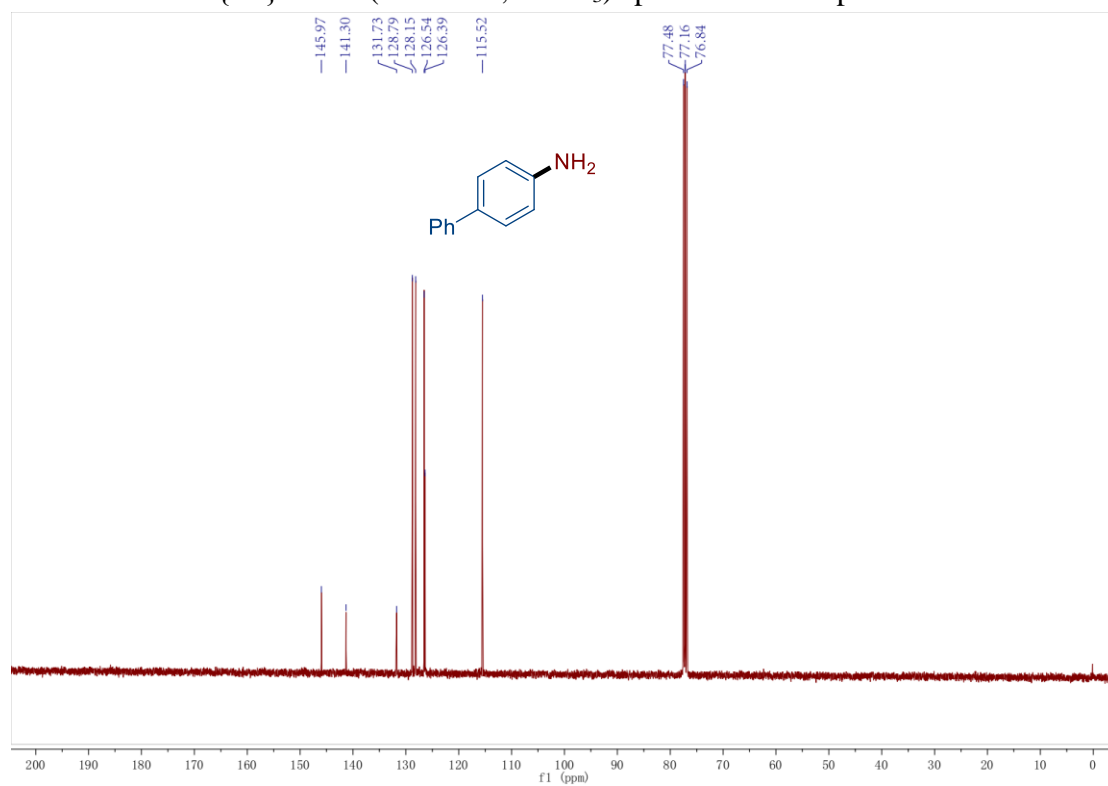

$^1\text{H}$  NMR (400 MHz,  $\text{CDCl}_3$ ) spectrum of compound **17**

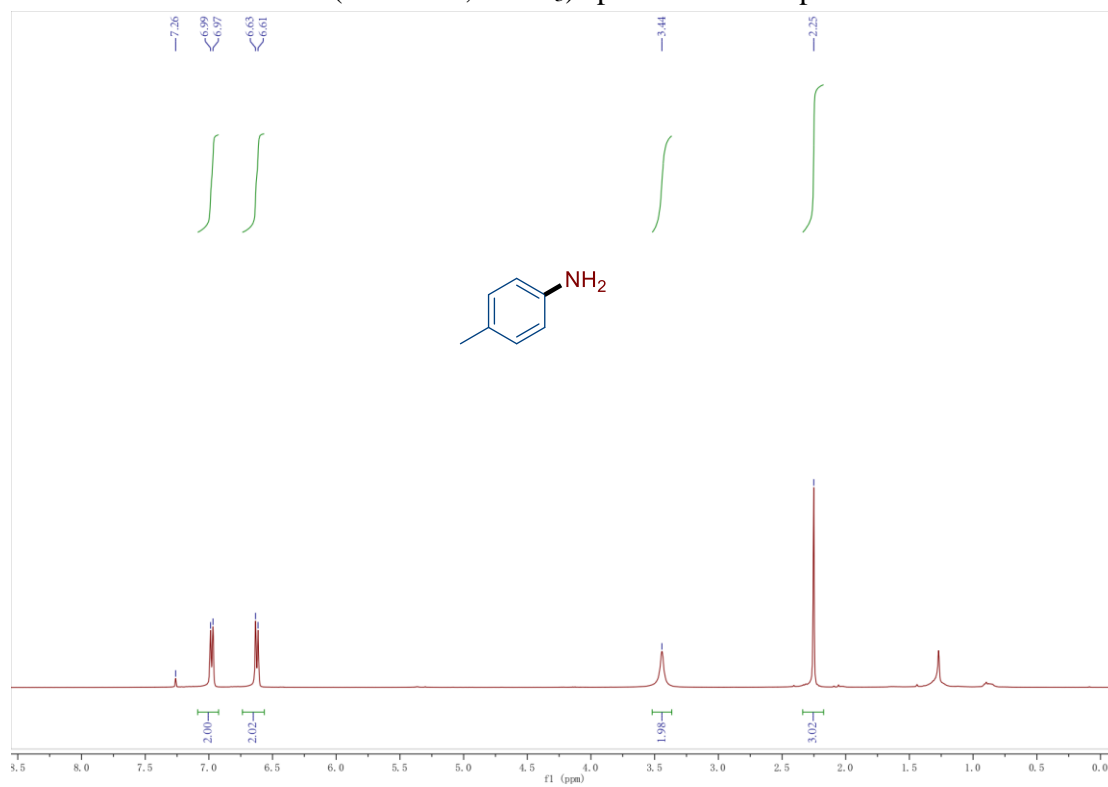

$^{13}\text{C}\{^1\text{H}\}$  NMR (100 MHz,  $\text{CDCl}_3$ ) spectrum of compound **17**

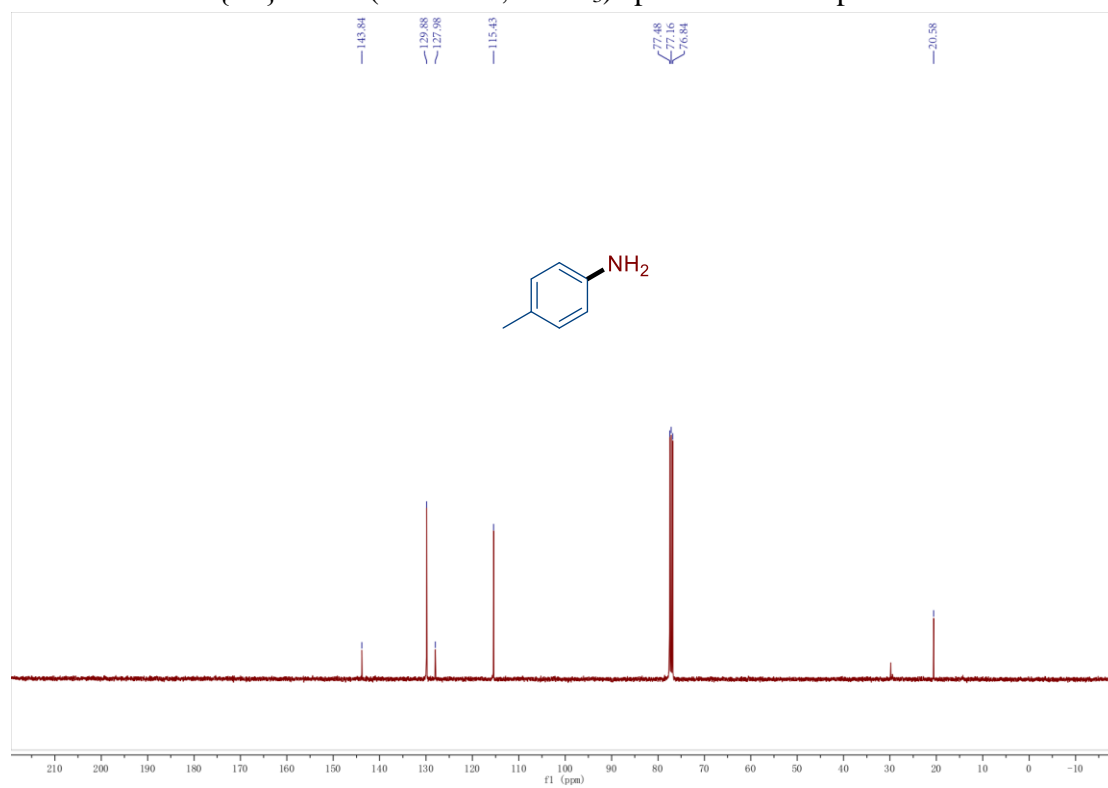

$^1\text{H}$  NMR (400 MHz,  $\text{CDCl}_3$ ) spectrum of compound **18**

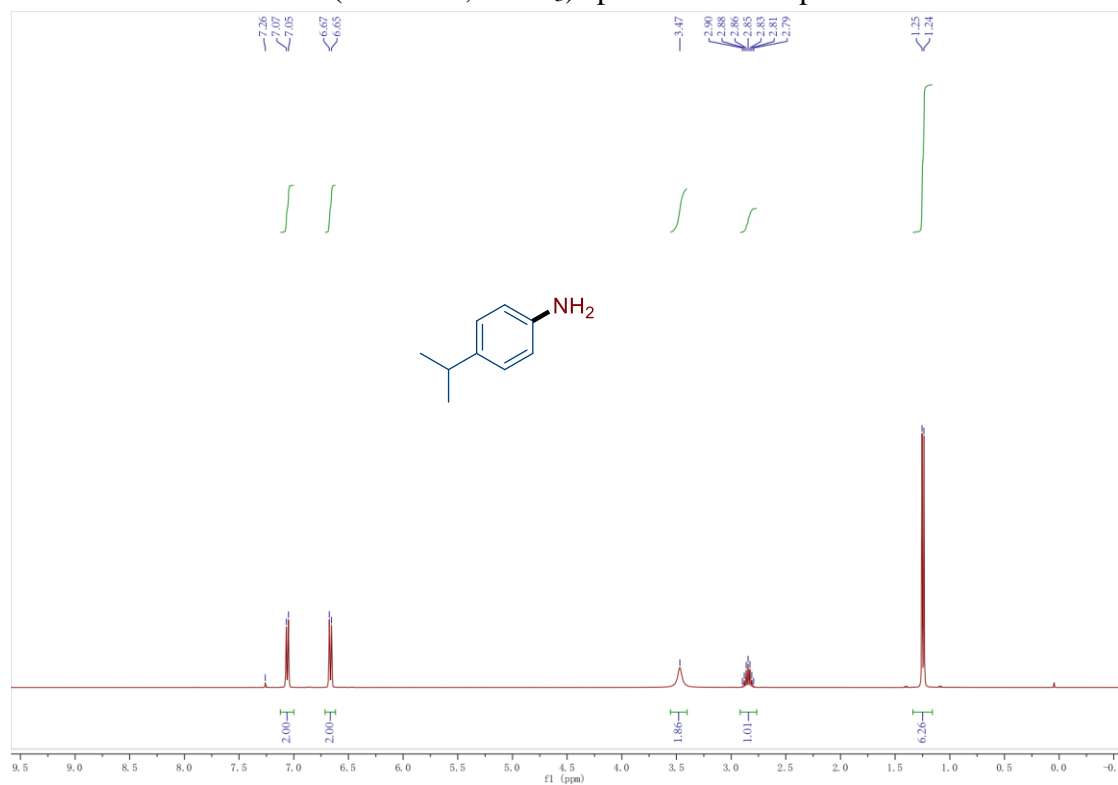

$^{13}\text{C}\{^1\text{H}\}$  NMR (100 MHz,  $\text{CDCl}_3$ ) spectrum of compound **18**

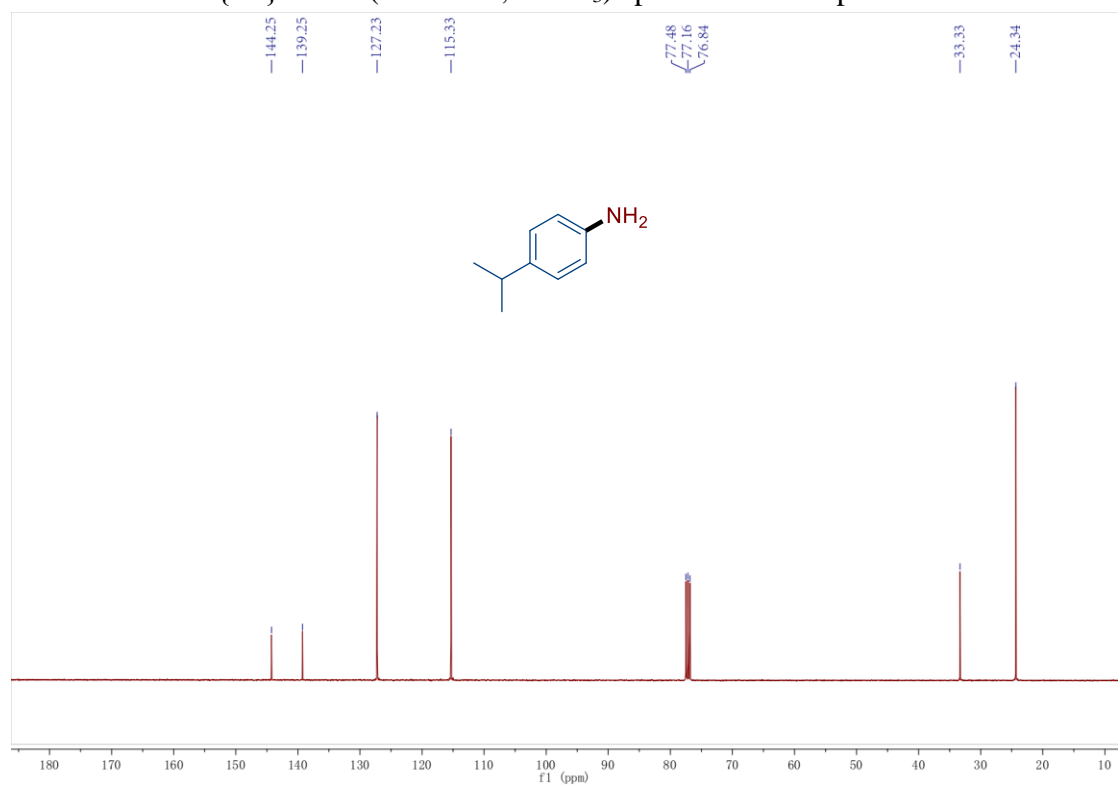

$^1\text{H}$  NMR (400 MHz,  $\text{CDCl}_3$ ) spectrum of compound **19**

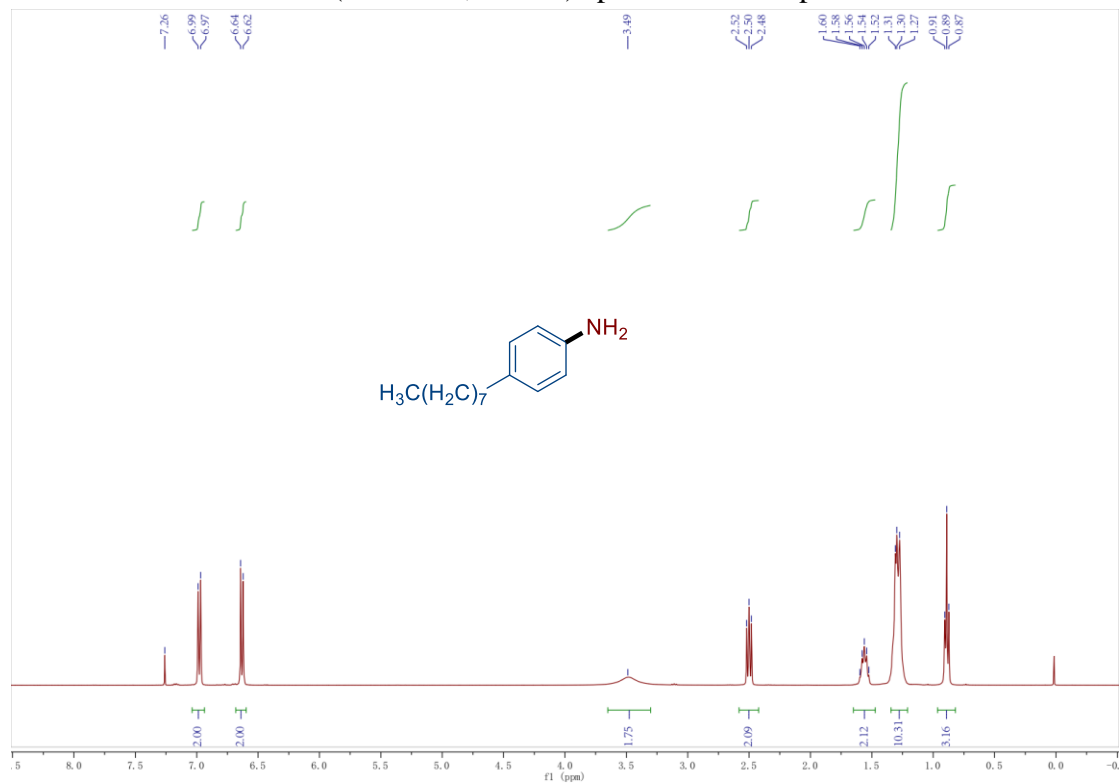

$^{13}\text{C}\{^1\text{H}\}$  NMR (100 MHz,  $\text{CDCl}_3$ ) spectrum of compound **19**

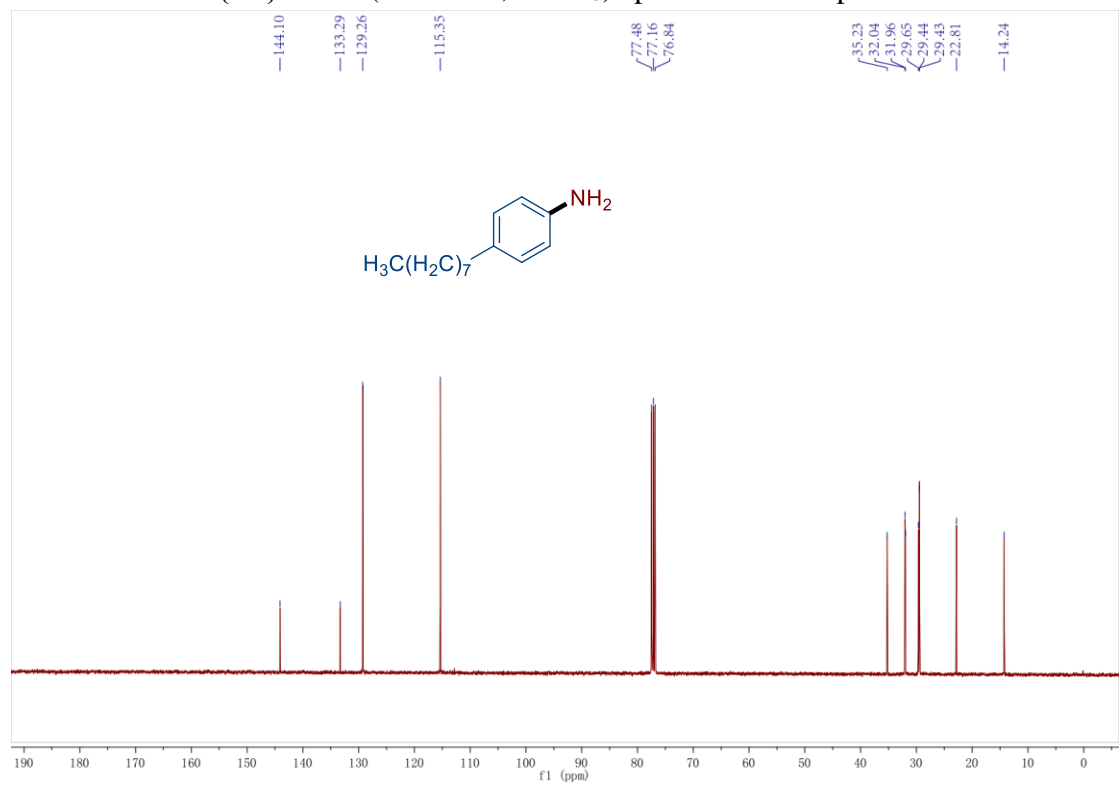

$^1\text{H}$  NMR (400 MHz,  $\text{CDCl}_3$ ) spectrum of compound **20**

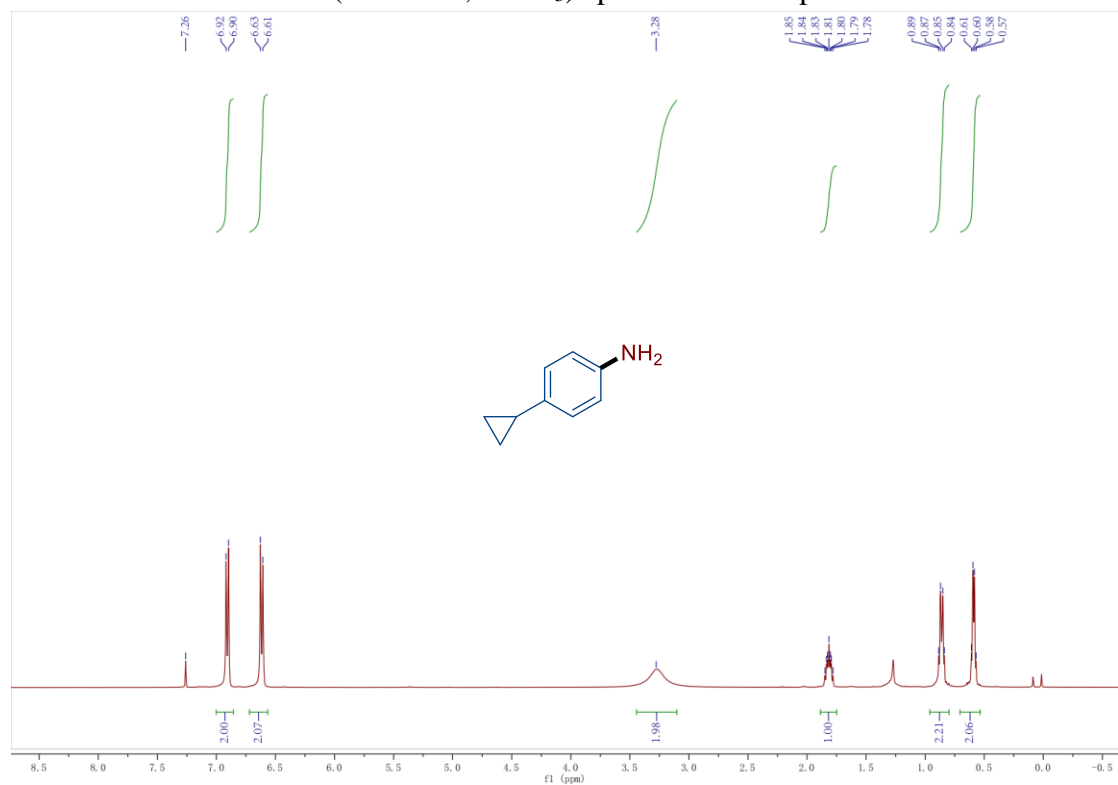

$^{13}\text{C}\{^1\text{H}\}$  NMR (100 MHz,  $\text{CDCl}_3$ ) spectrum of compound **20**

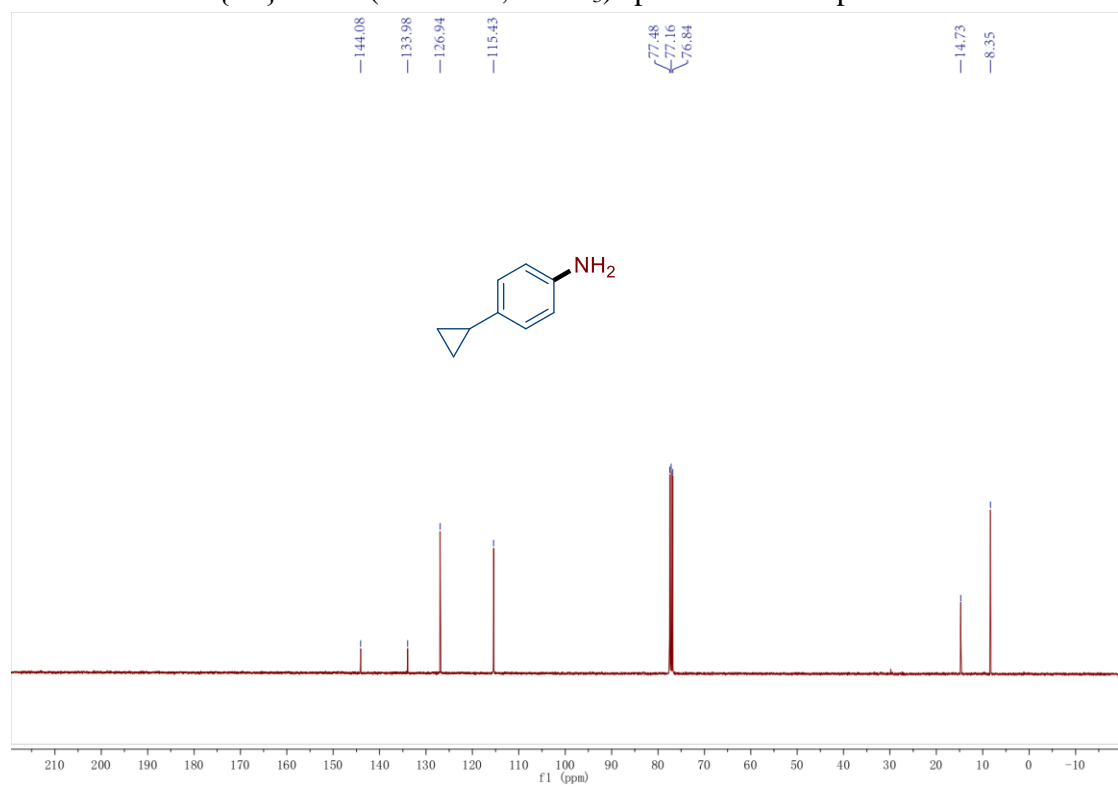



$^1\text{H}$  NMR (400 MHz,  $\text{CDCl}_3$ ) spectrum of compound **21**

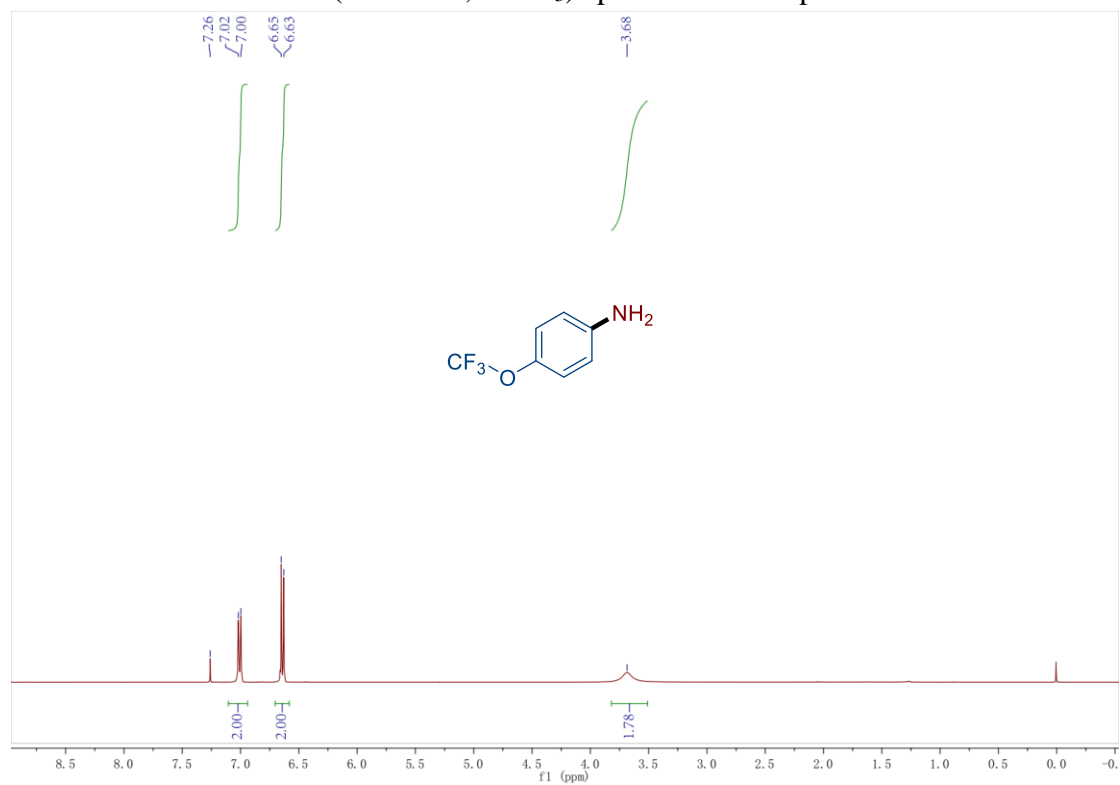

$^{13}\text{C}\{^1\text{H}\}$  NMR (100 MHz,  $\text{CDCl}_3$ ) spectrum of compound **21**

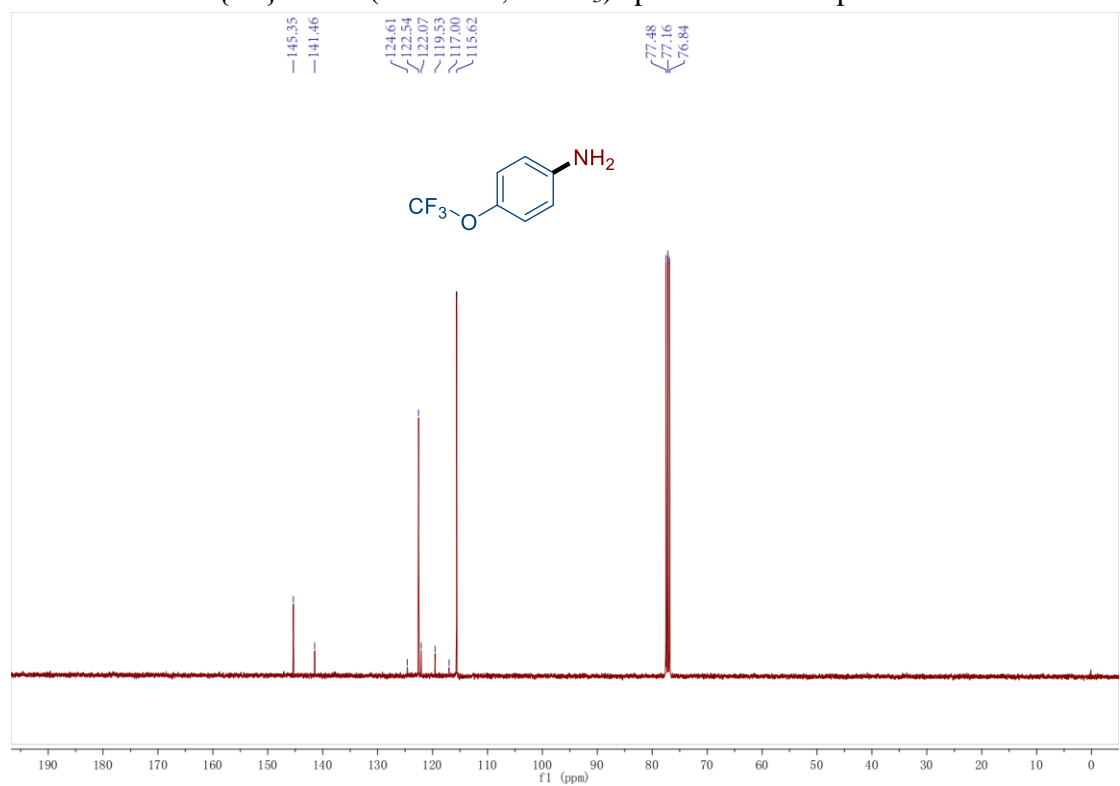

$^{19}\text{F}$  NMR (376 MHz,  $\text{CDCl}_3$ ) spectrum of compound **21**

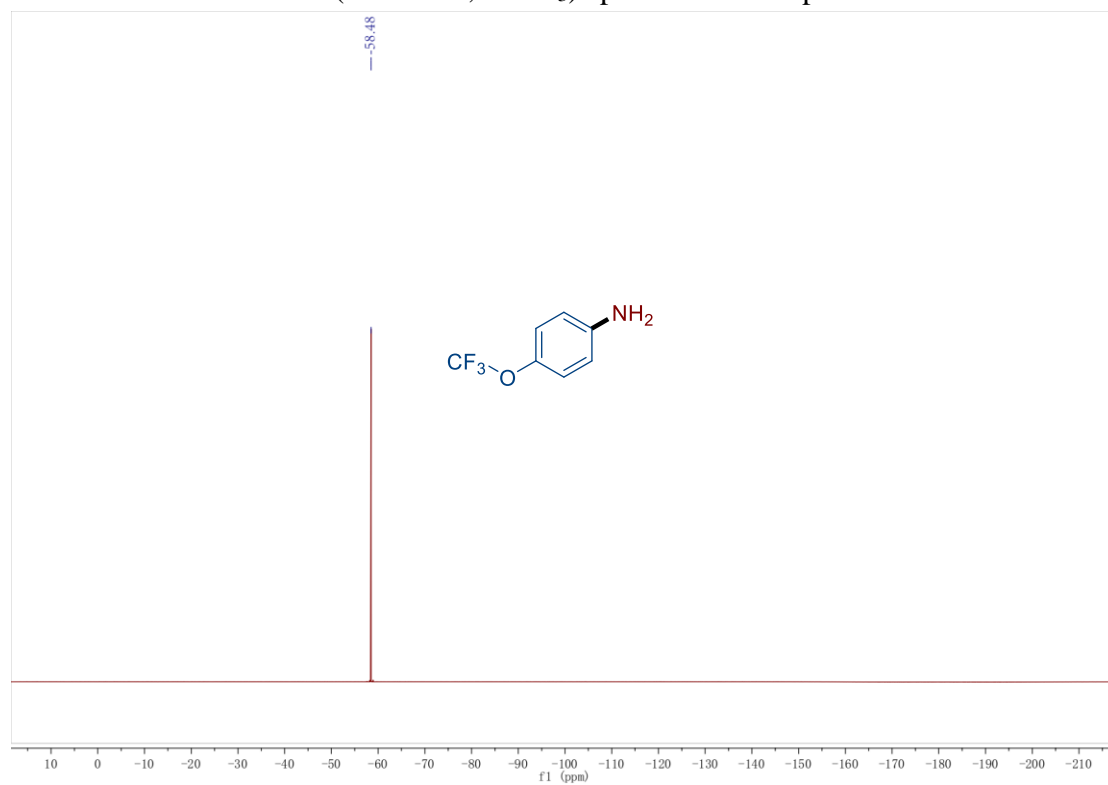

$^1\text{H}$  NMR (400 MHz,  $\text{CDCl}_3$ ) spectrum of compound **22**

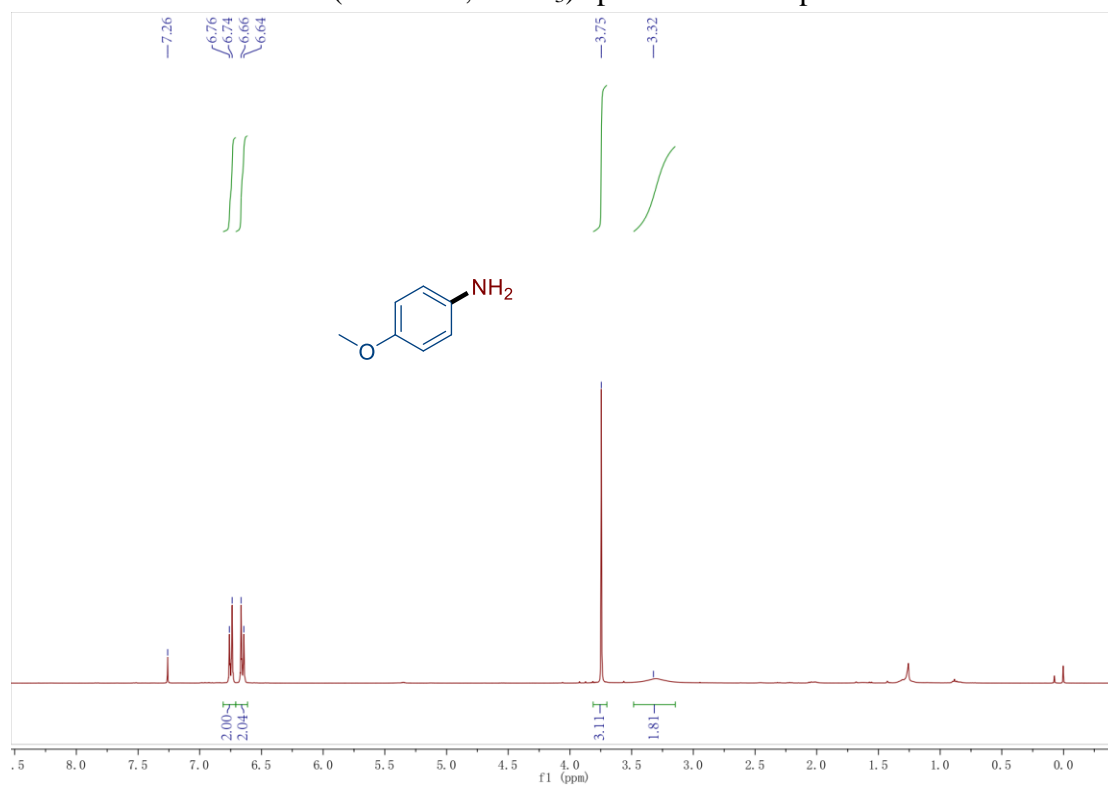

$^{13}\text{C}\{^1\text{H}\}$  NMR (100 MHz,  $\text{CDCl}_3$ ) spectrum of compound **22**

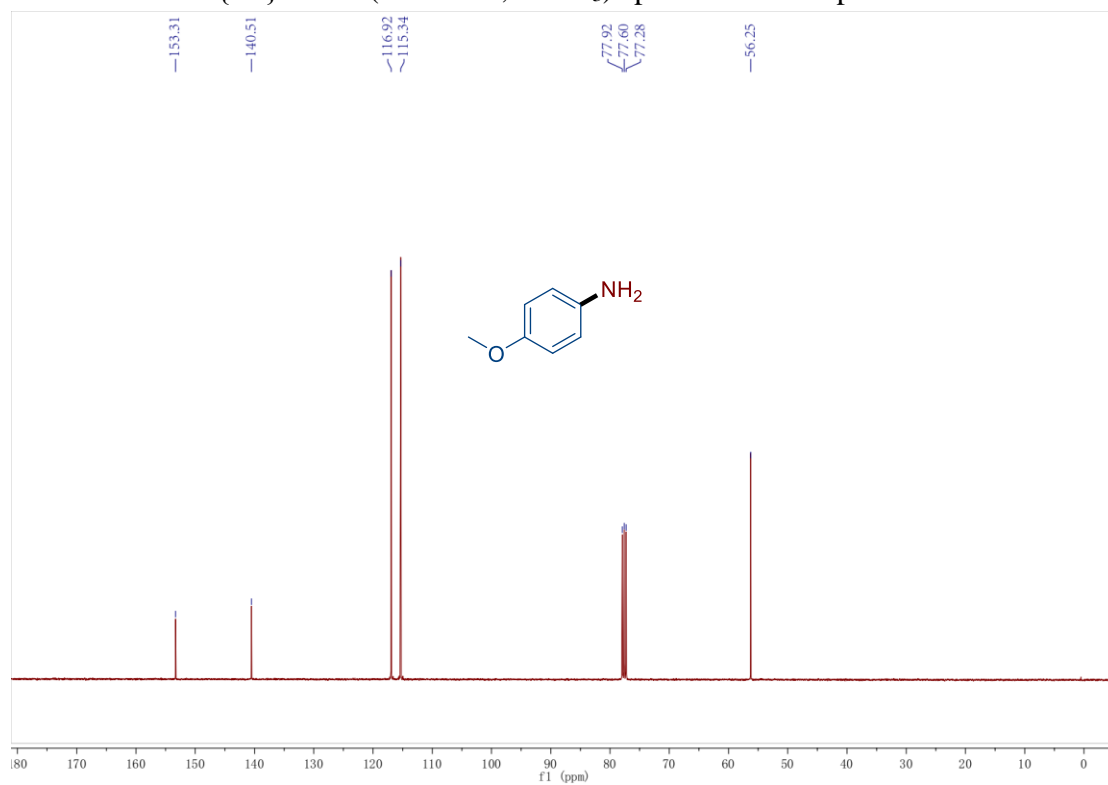

$^1\text{H}$  NMR (400 MHz,  $\text{CDCl}_3$ ) spectrum of compound **2**

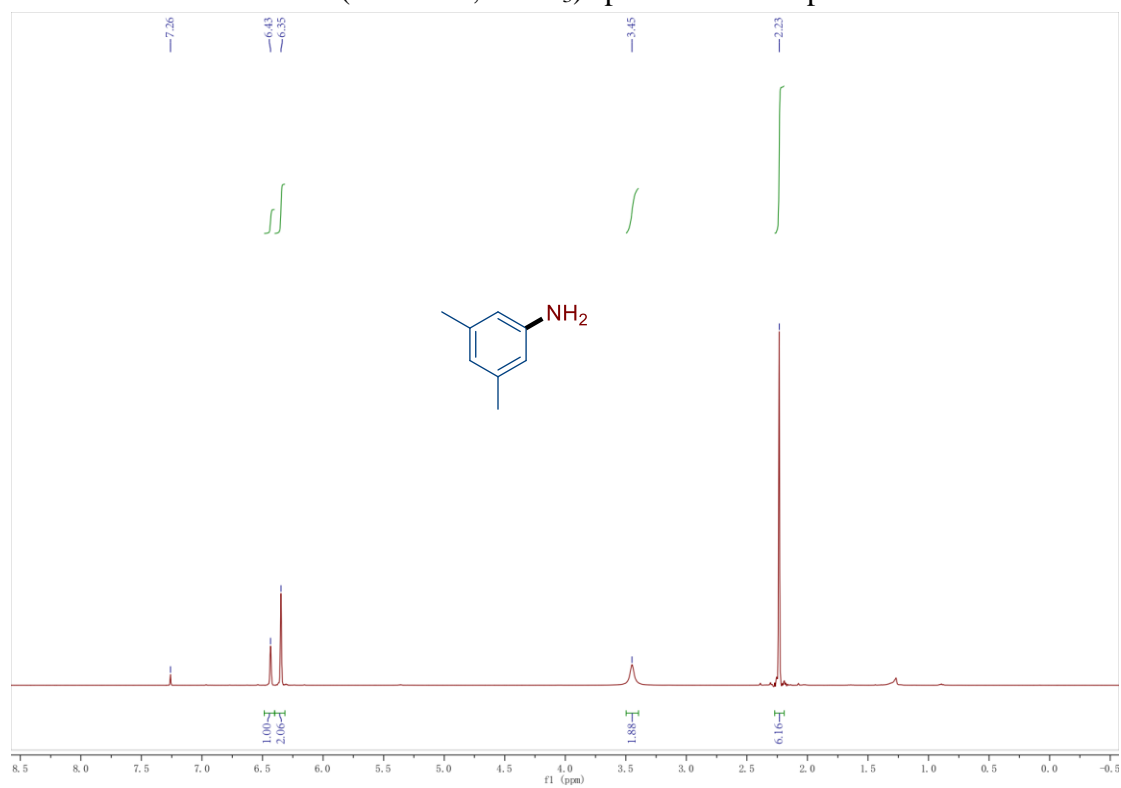

$^{13}\text{C}\{^1\text{H}\}$  NMR (100 MHz,  $\text{CDCl}_3$ ) spectrum of compound **2**

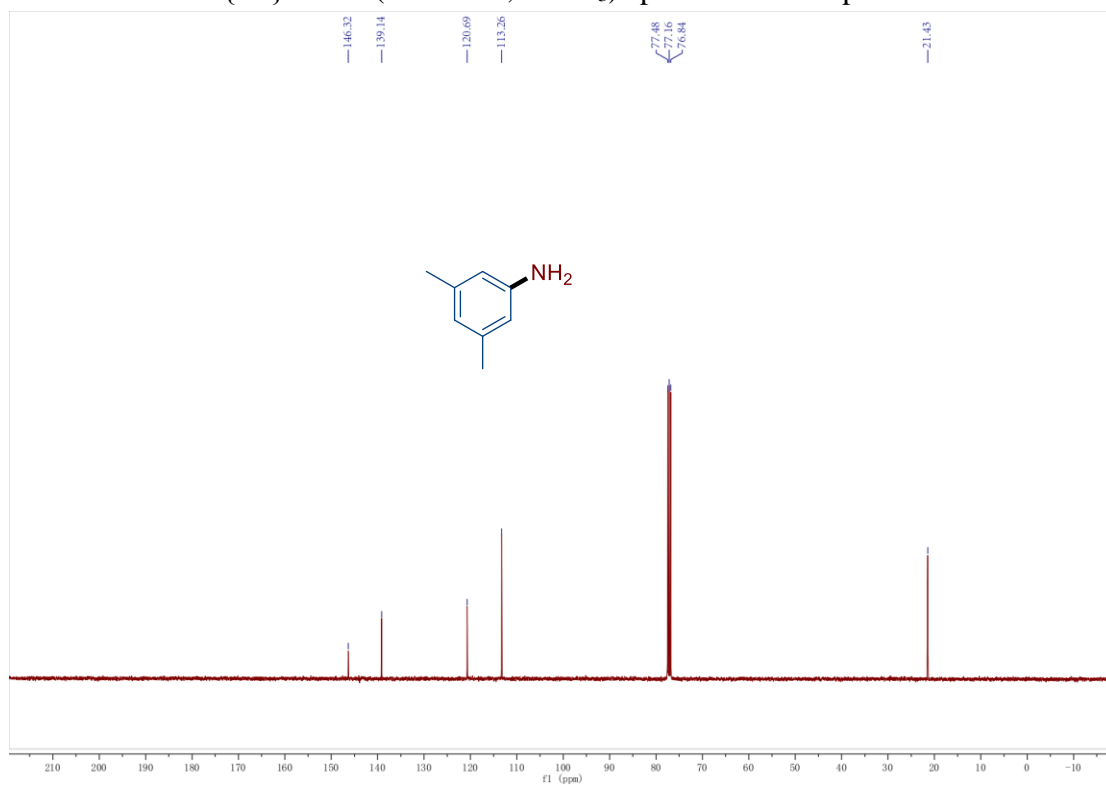

$^1\text{H}$  NMR (400 MHz,  $\text{CDCl}_3$ ) spectrum of compound **23**

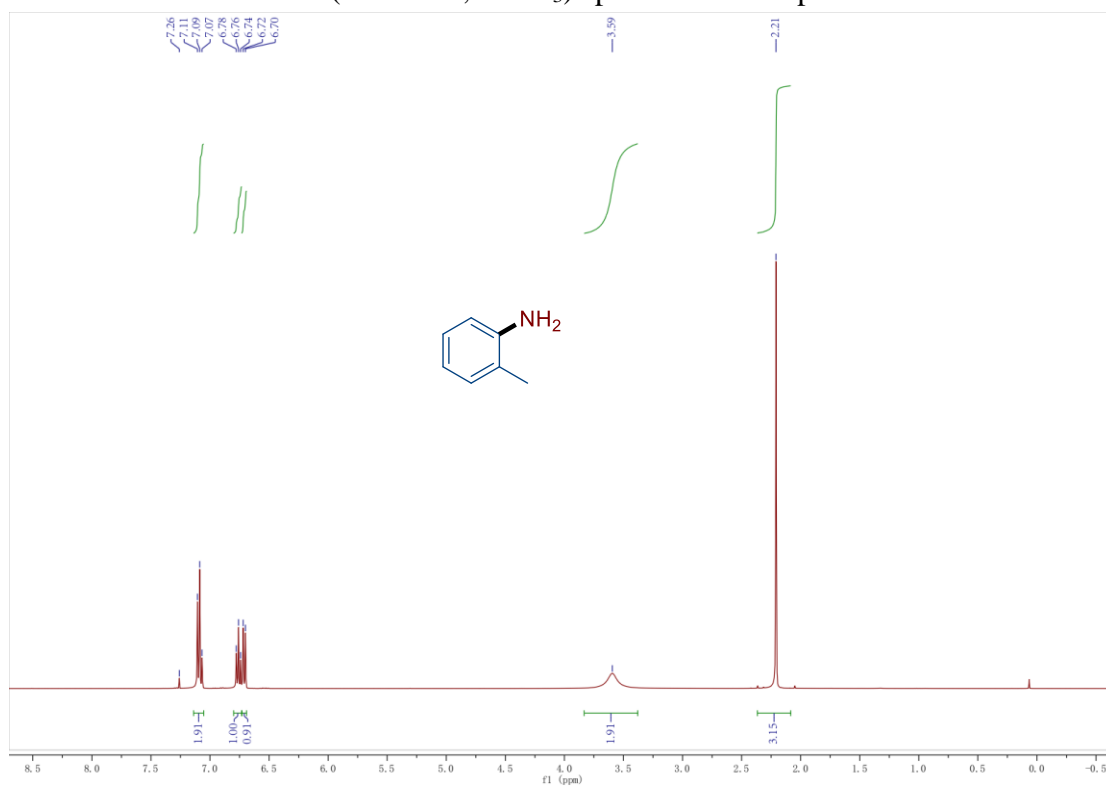

$^{13}\text{C}\{^1\text{H}\}$  NMR (100 MHz,  $\text{CDCl}_3$ ) spectrum of compound **23**

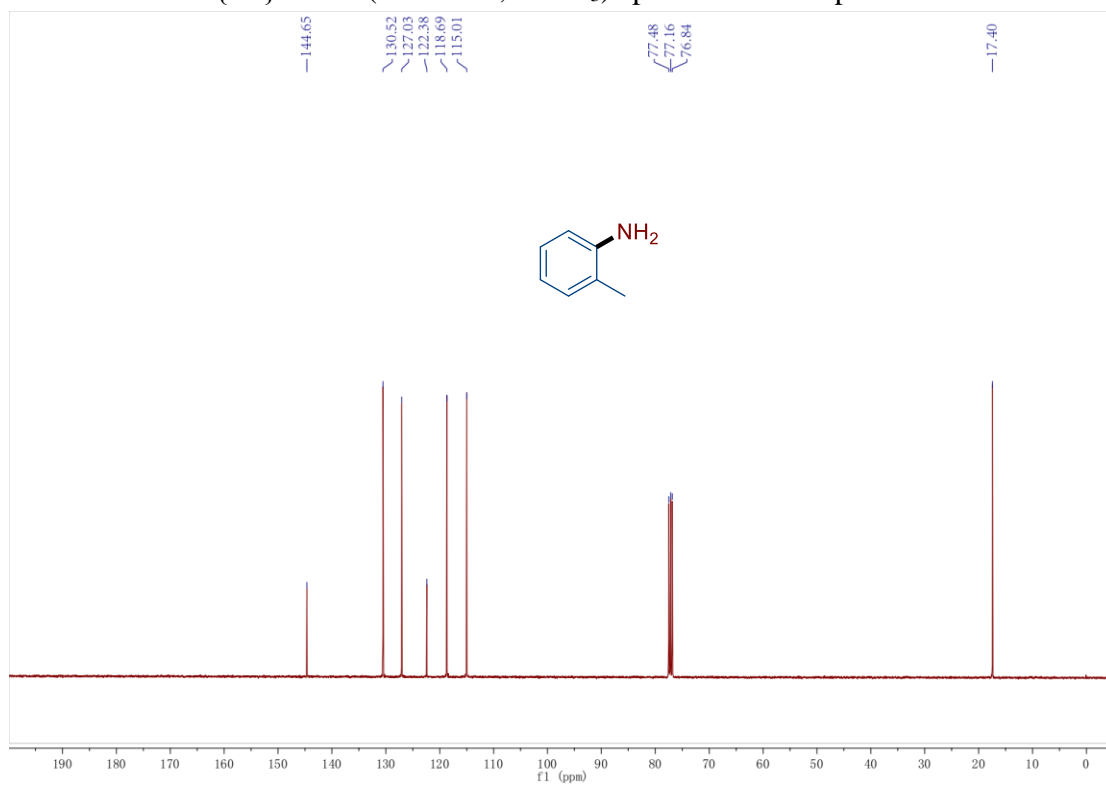

$^1\text{H}$  NMR (400 MHz,  $\text{CDCl}_3$ ) spectrum of compound **24**

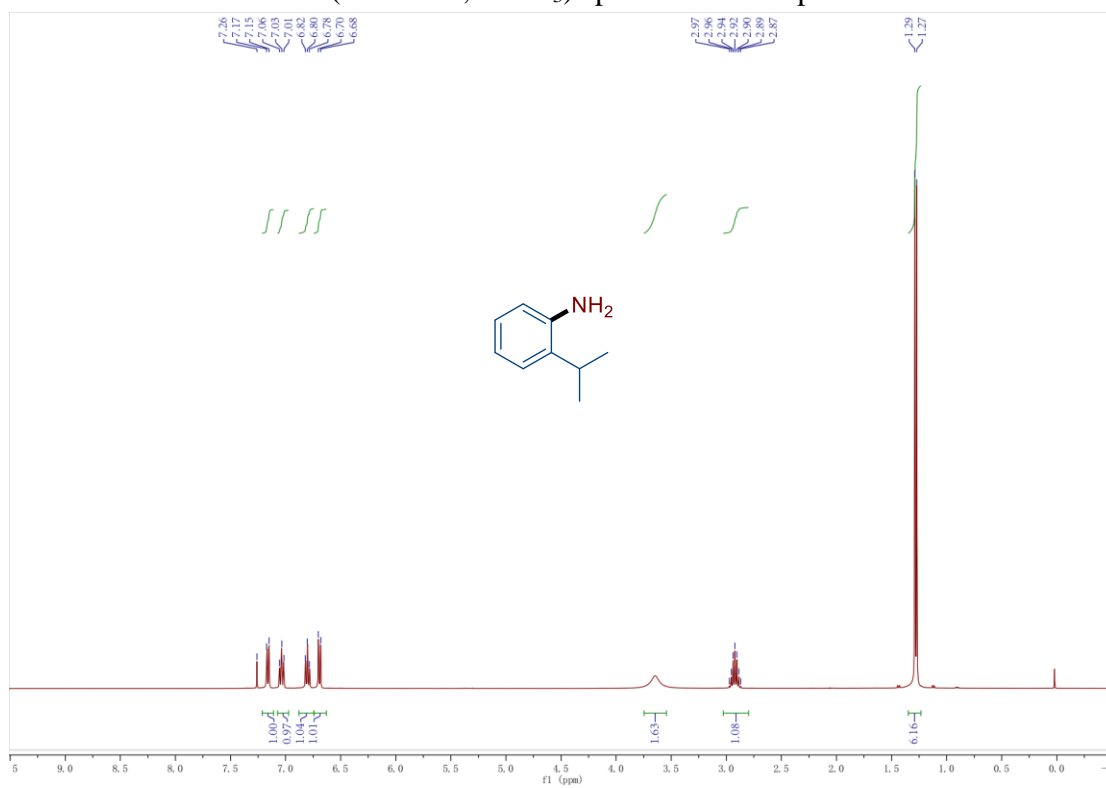

$^{13}\text{C}\{^1\text{H}\}$  NMR (100 MHz,  $\text{CDCl}_3$ ) spectrum of compound **24**

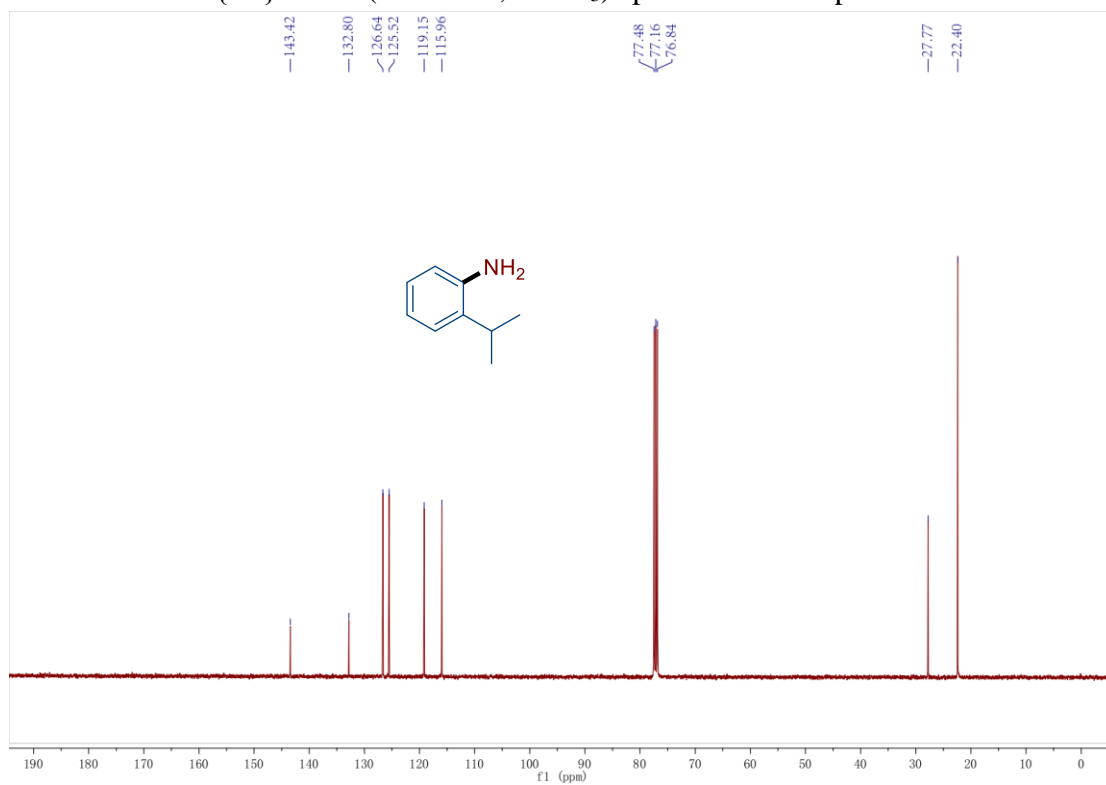

$^1\text{H}$  NMR (400 MHz,  $\text{CDCl}_3$ ) spectrum of compound **25**

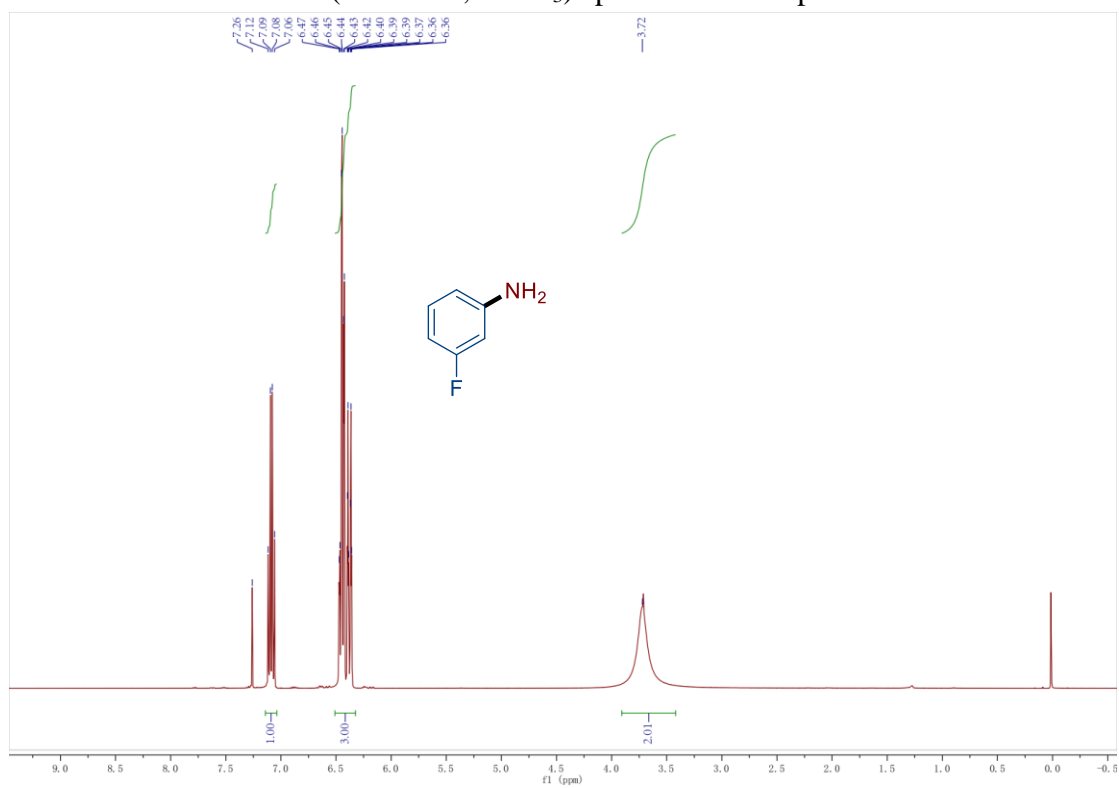

$^{13}\text{C}\{^1\text{H}\}$  NMR (100 MHz,  $\text{CDCl}_3$ ) spectrum of compound **25**

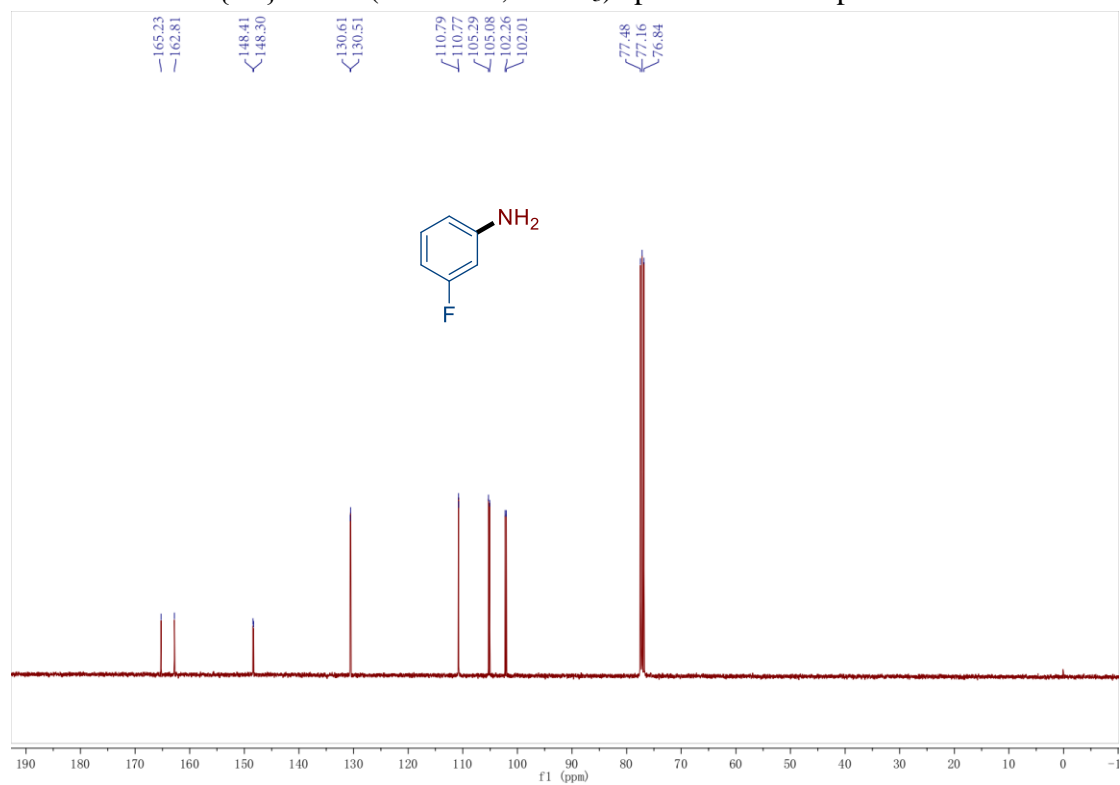

$^{19}\text{F}$  NMR (376 MHz,  $\text{CDCl}_3$ ) spectrum of compound **25**

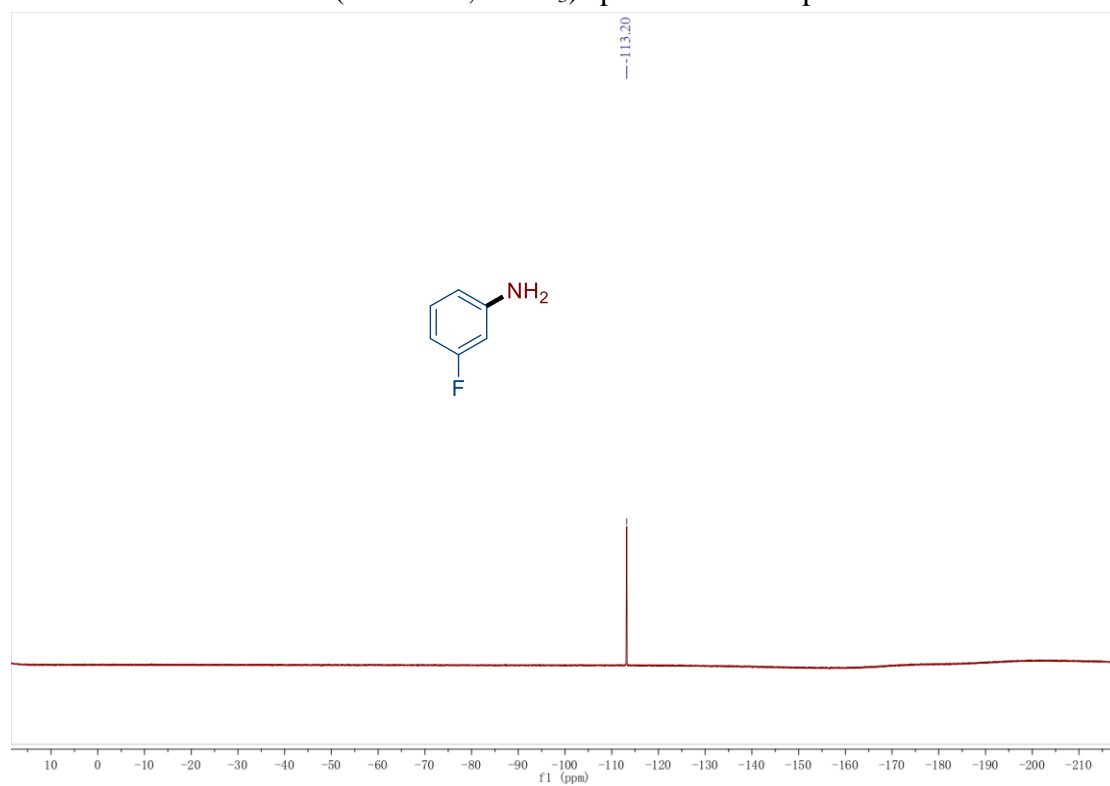

$^1\text{H}$  NMR (400 MHz,  $\text{CDCl}_3$ ) spectrum of compound **26**

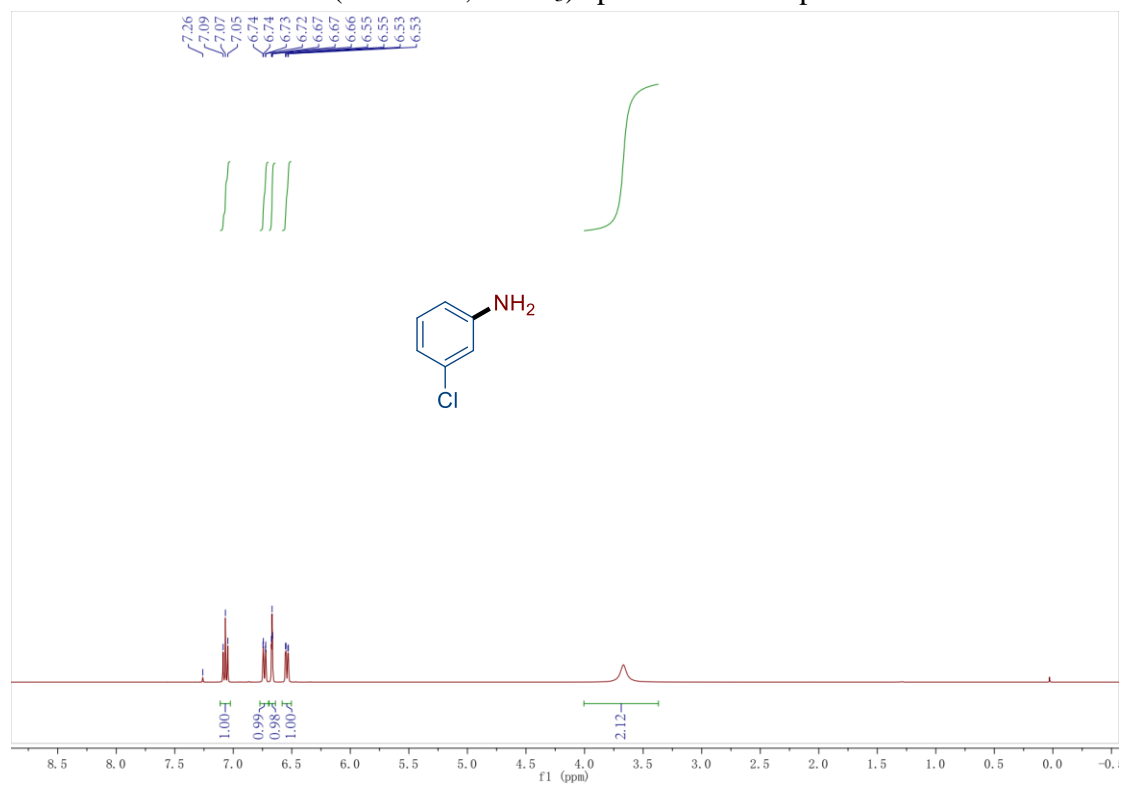

$^{13}\text{C}\{^1\text{H}\}$  NMR (100 MHz,  $\text{CDCl}_3$ ) spectrum of compound **26**

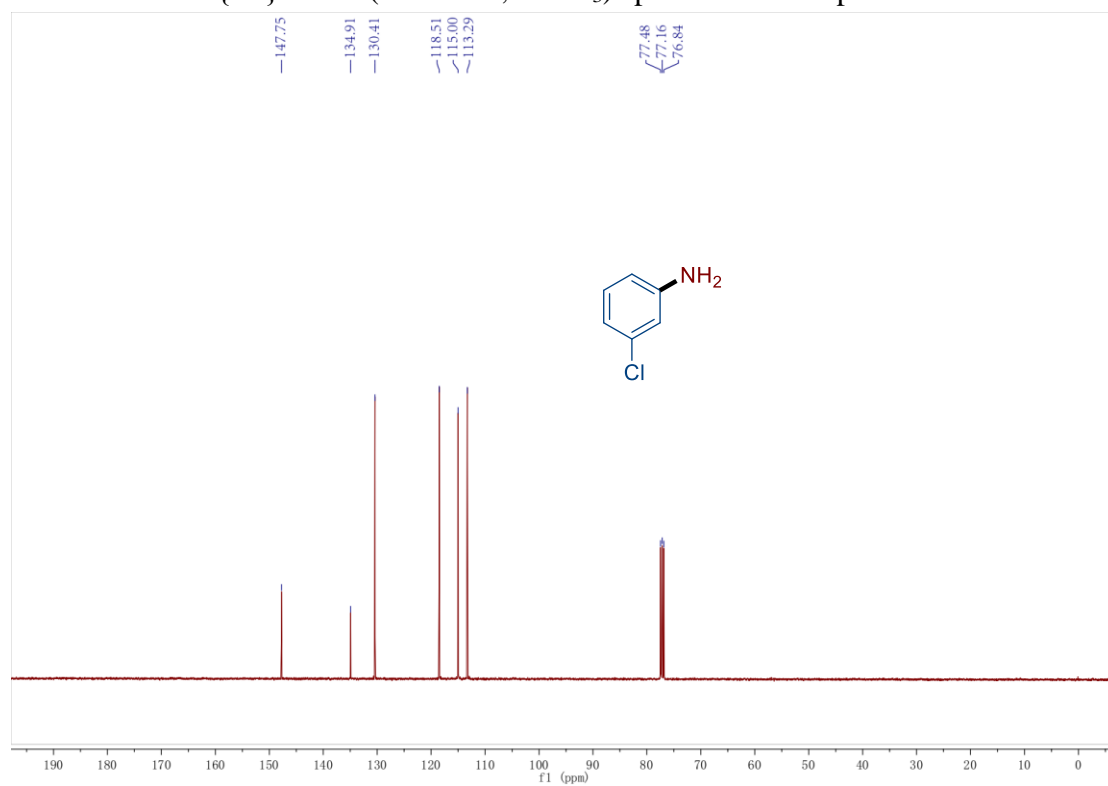



$^1\text{H}$  NMR (400 MHz,  $\text{CDCl}_3$ ) spectrum of compound **27**

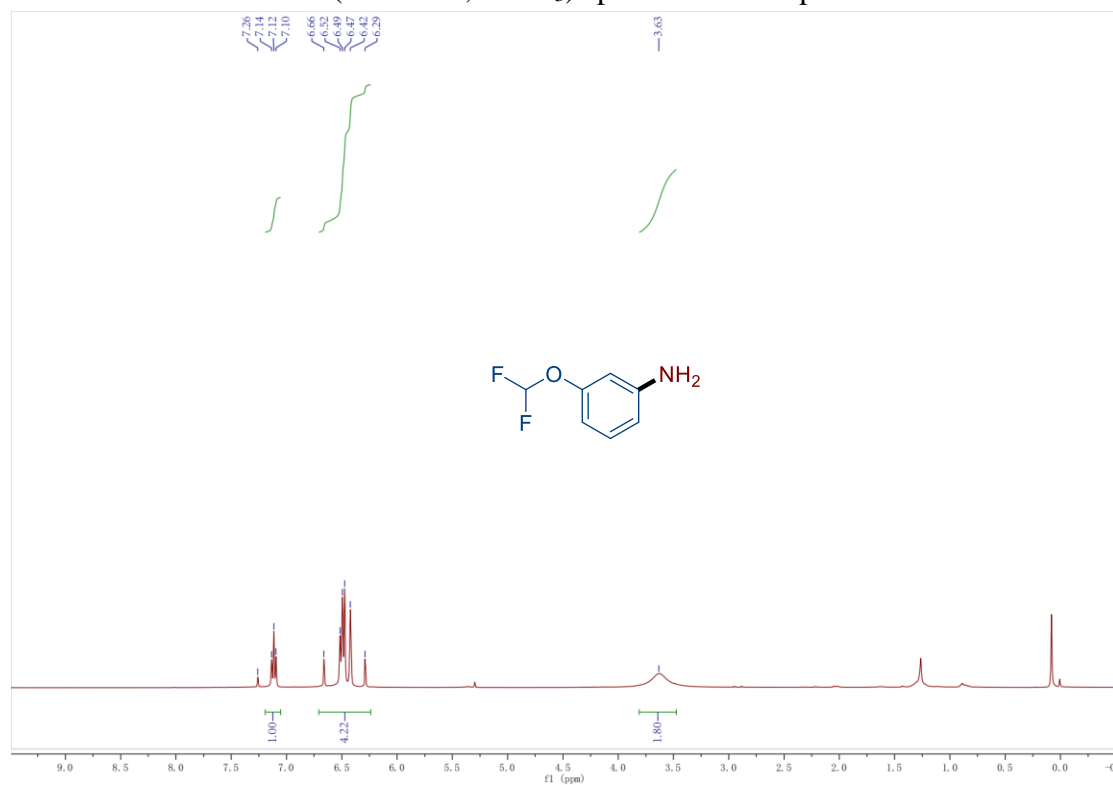

$^{13}\text{C}\{^1\text{H}\}$  NMR (100 MHz,  $\text{CDCl}_3$ ) spectrum of compound **27**

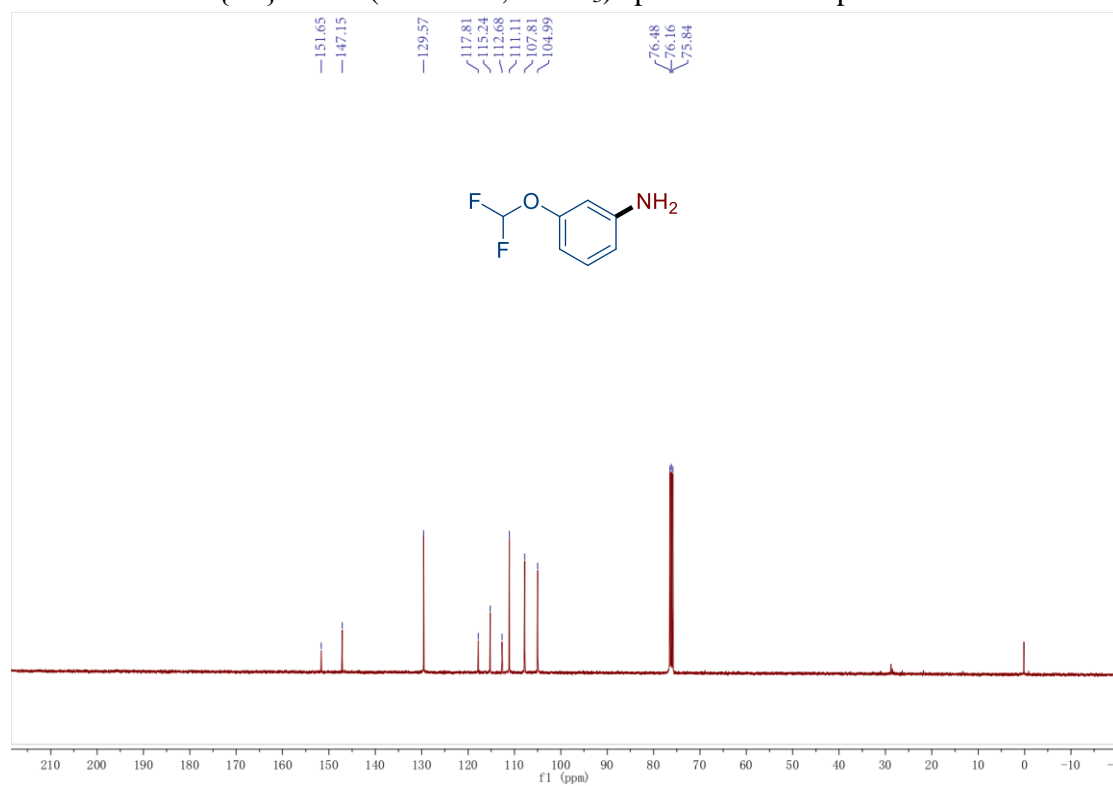

$^{19}\text{F}$  NMR (376 MHz,  $\text{CDCl}_3$ ) spectrum of compound **27**

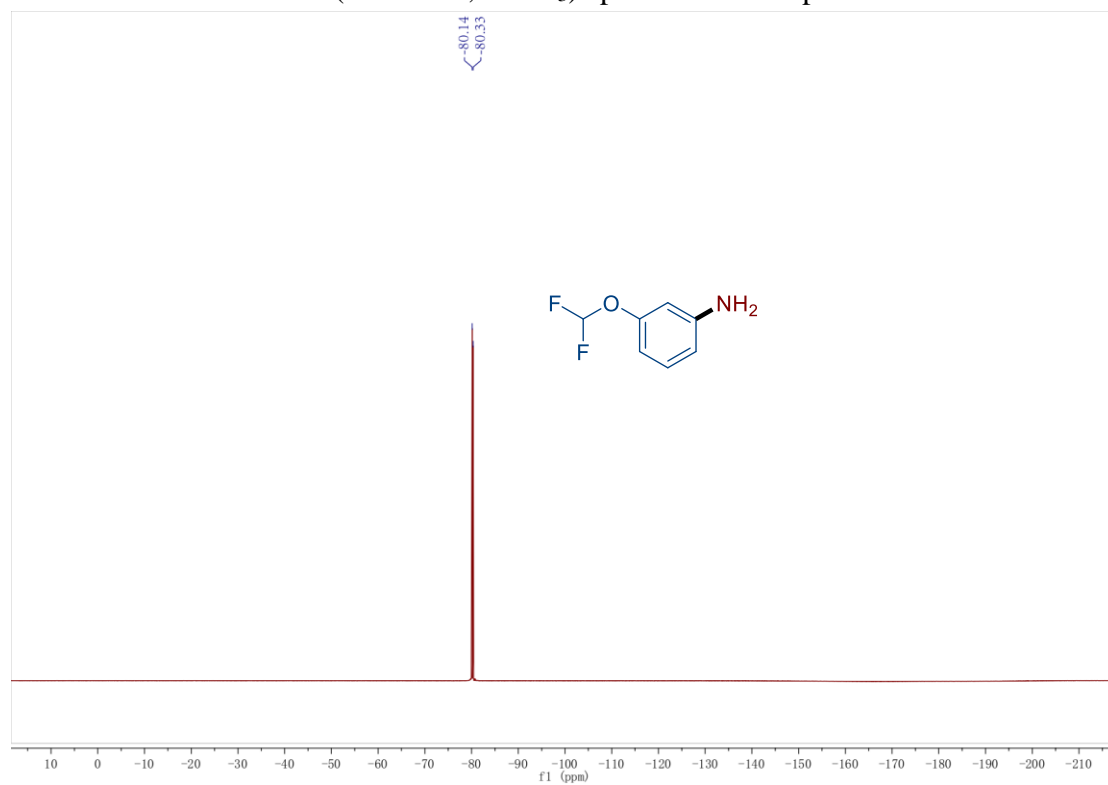

$^1\text{H}$  NMR (400 MHz,  $\text{CDCl}_3$ ) spectrum of compound **28**

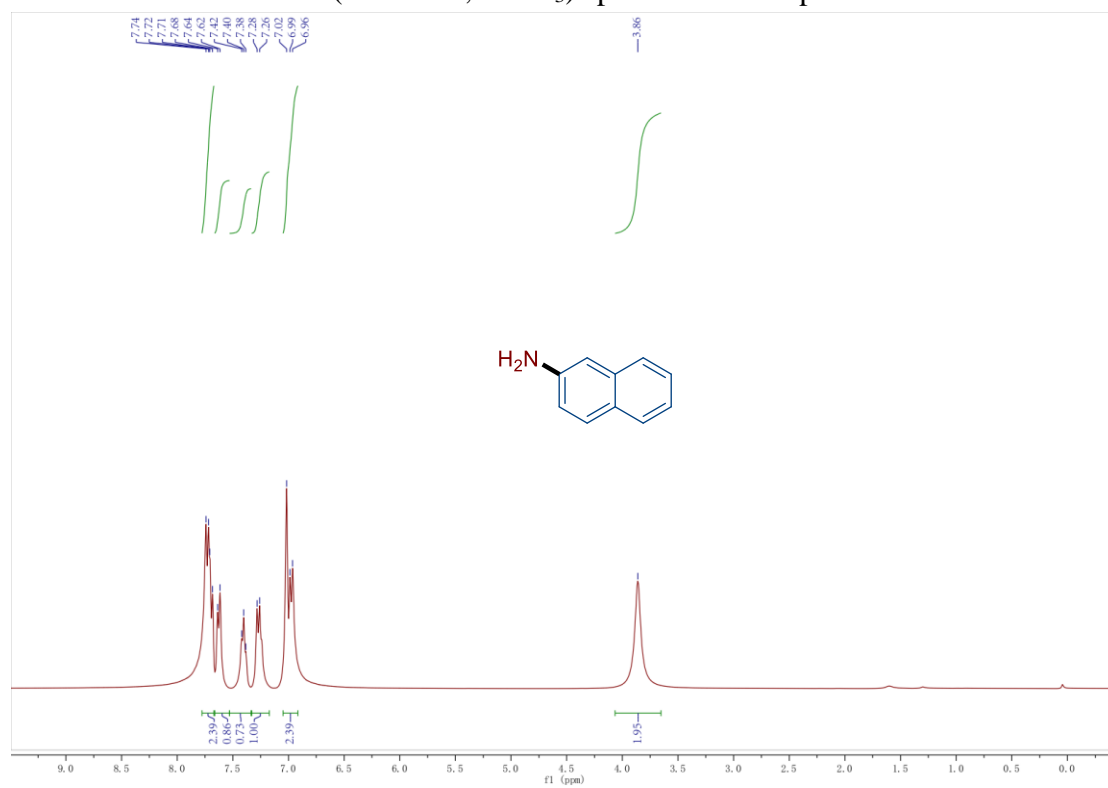

$^{13}\text{C}\{^1\text{H}\}$  NMR (100 MHz,  $\text{CDCl}_3$ ) spectrum of compound **28**

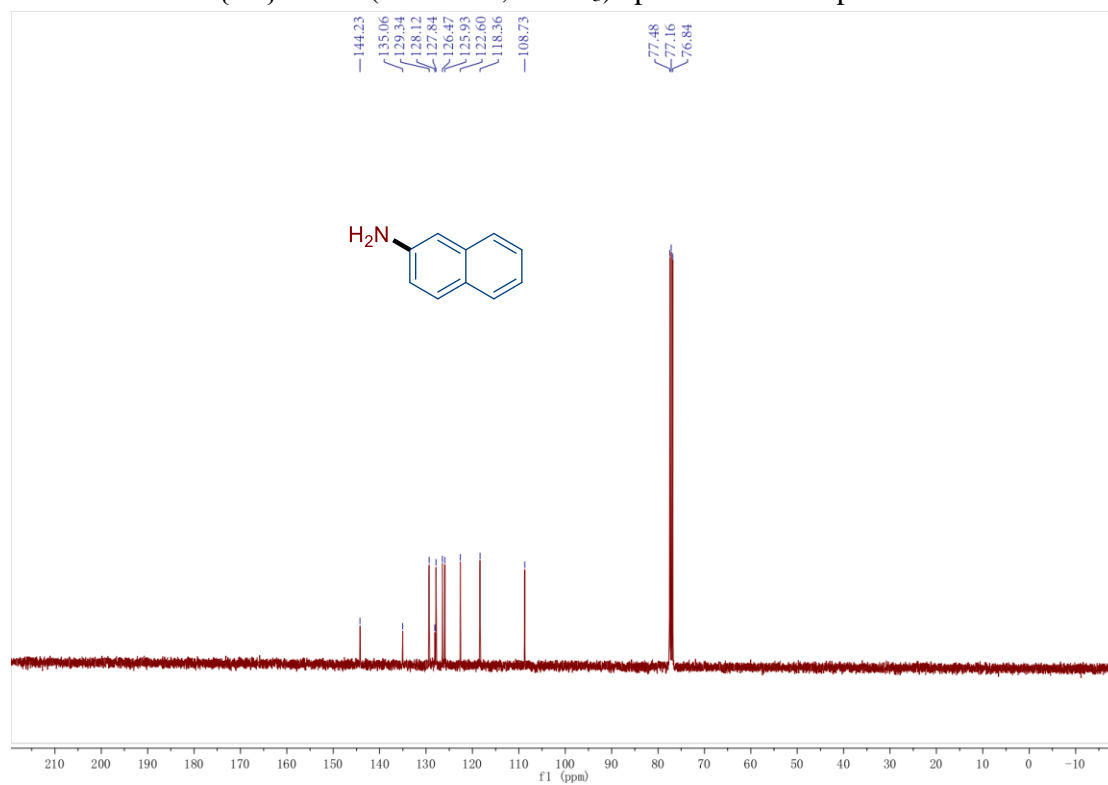

$^1\text{H}$  NMR (400 MHz,  $\text{CDCl}_3$ ) spectrum of compound **29**

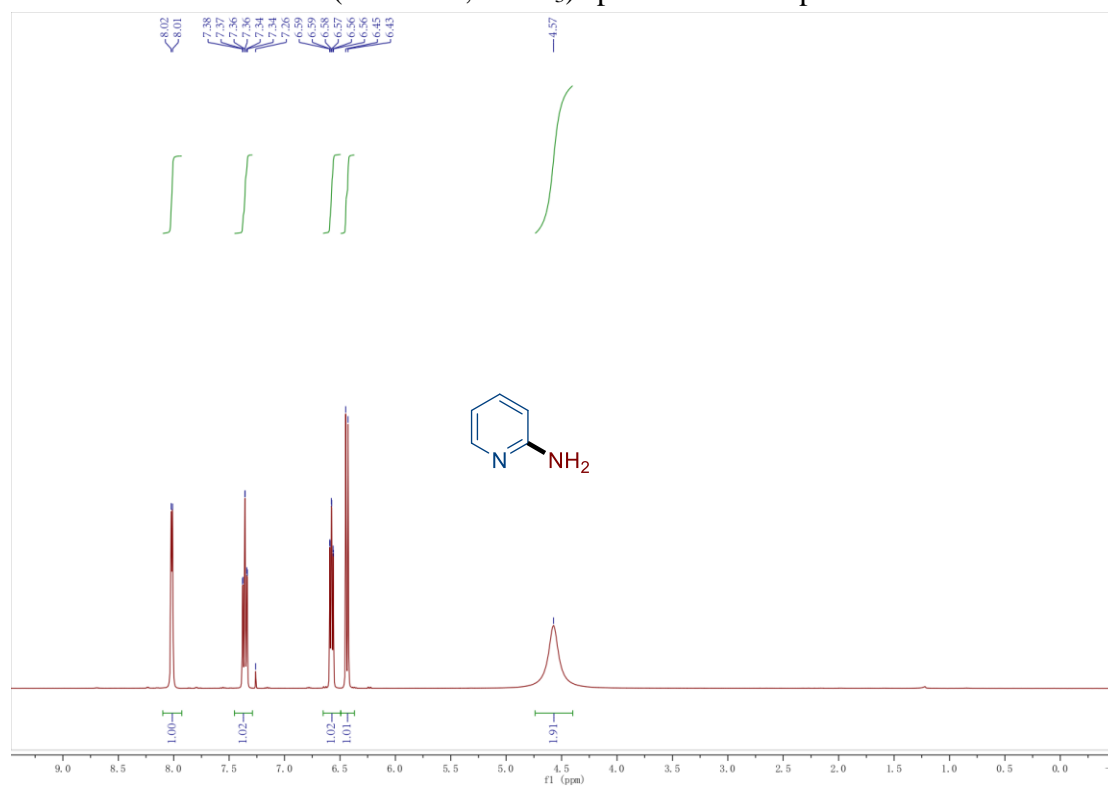

$^{13}\text{C}\{^1\text{H}\}$  NMR (100 MHz,  $\text{CDCl}_3$ ) spectrum of compound **29**

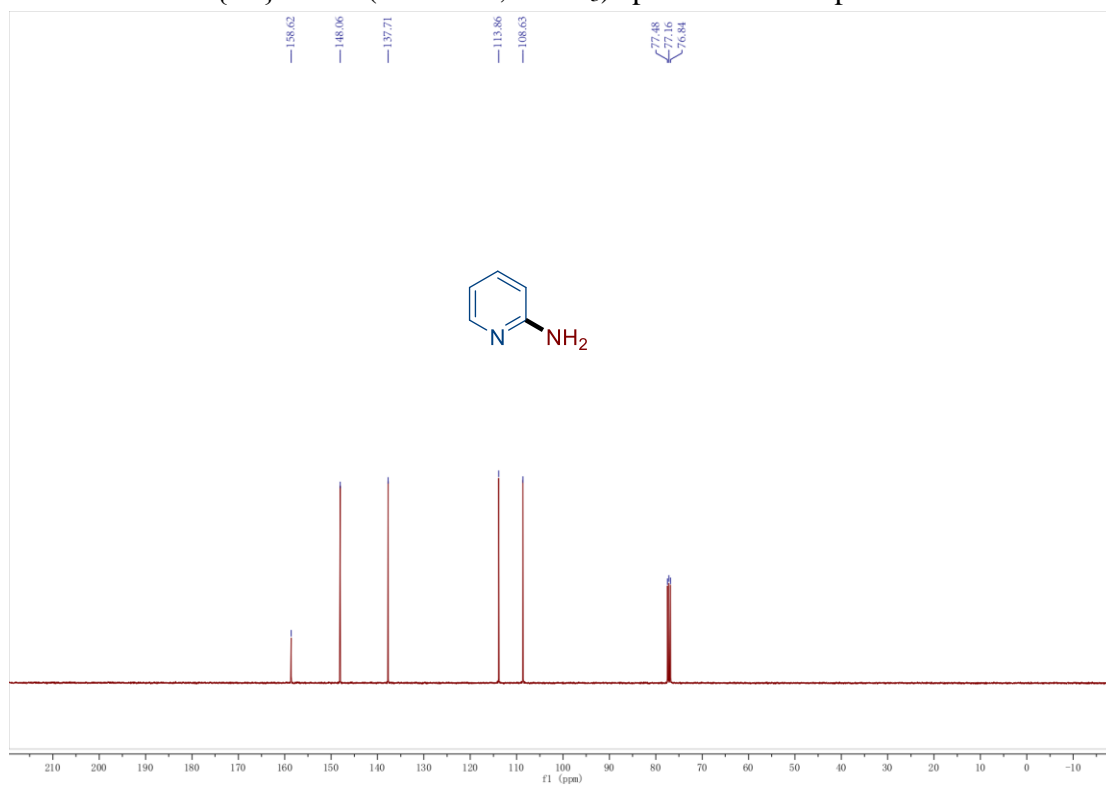

$^1\text{H}$  NMR (400 MHz,  $\text{CDCl}_3$ ) spectrum of compound **30**

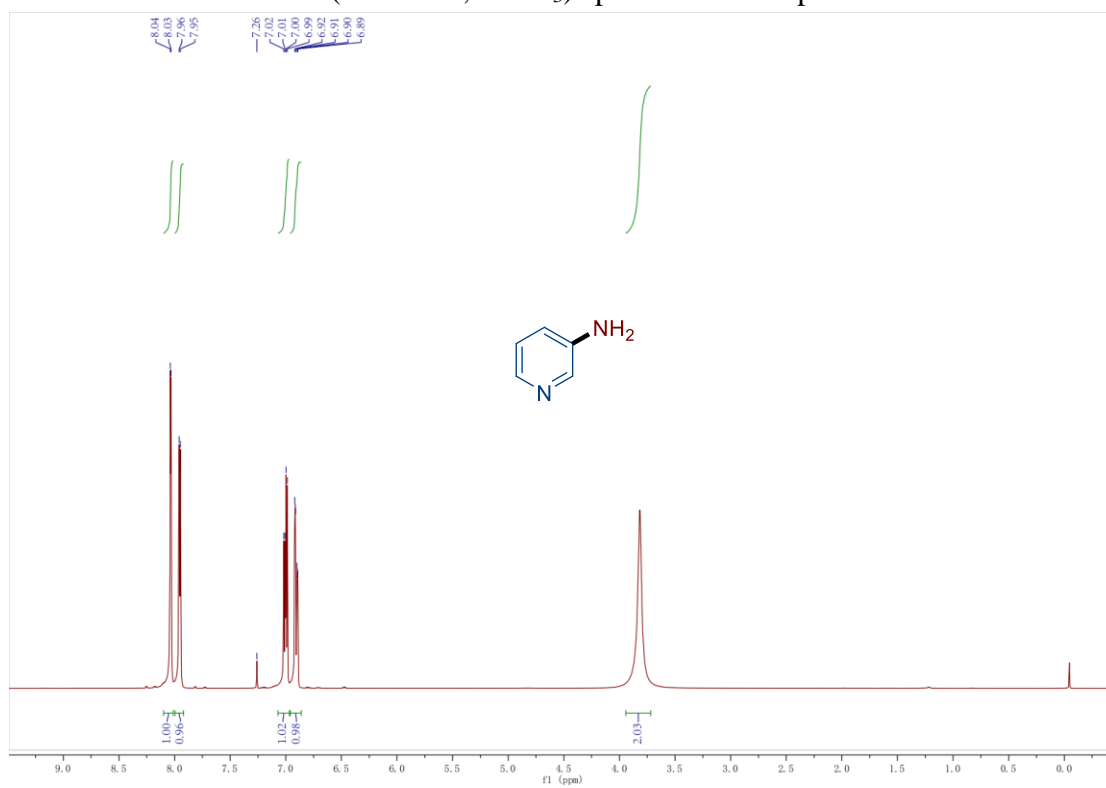

$^{13}\text{C}\{^1\text{H}\}$  NMR (100 MHz,  $\text{CDCl}_3$ ) spectrum of compound **30**

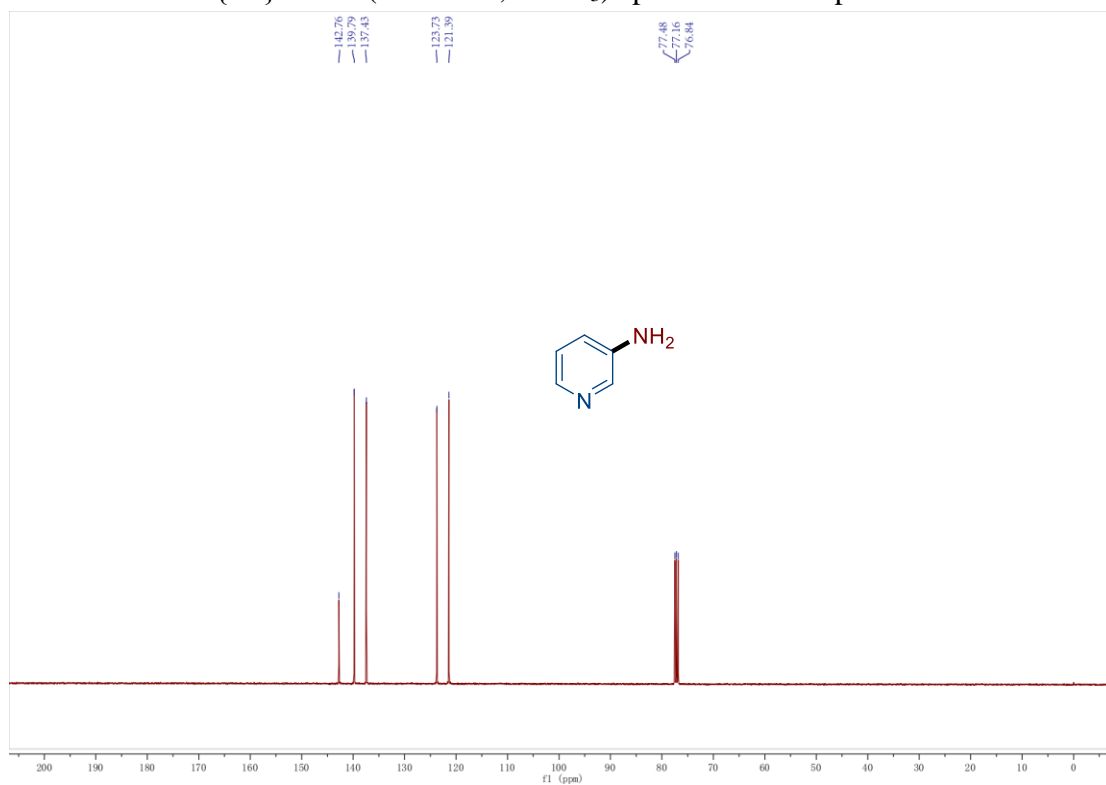

$^1\text{H}$  NMR (400 MHz,  $\text{CDCl}_3$ ) spectrum of compound **31**

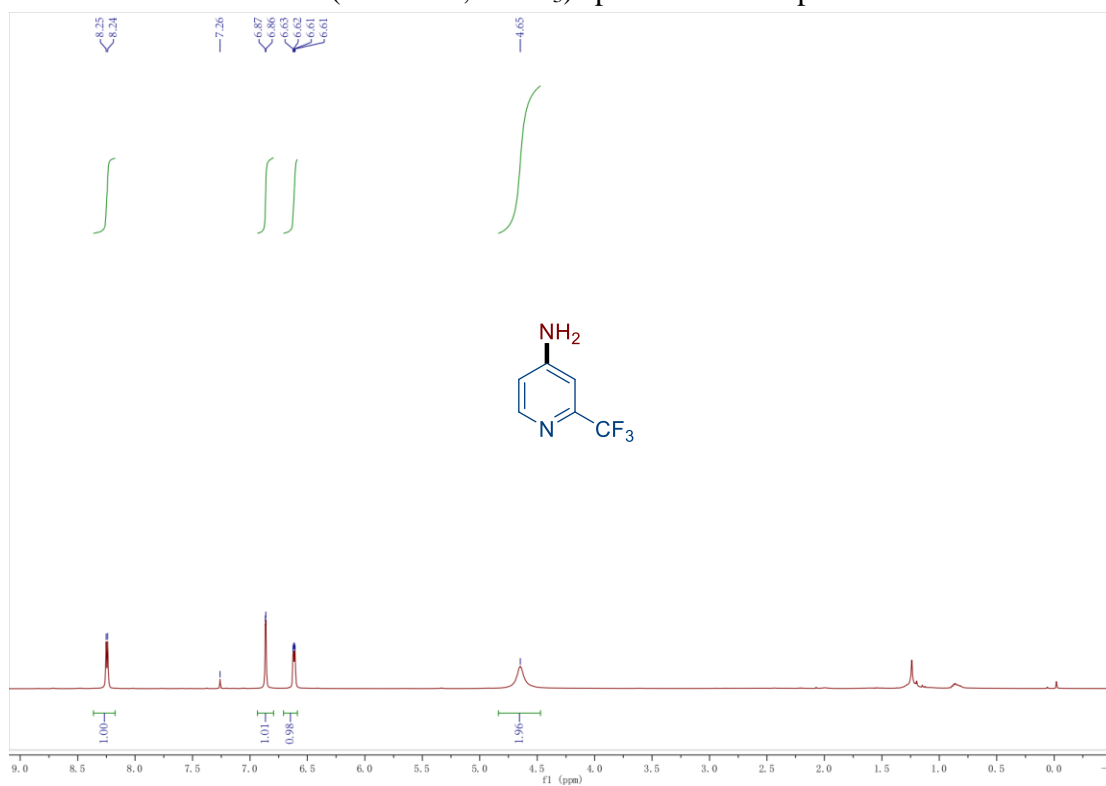

$^{13}\text{C}\{^1\text{H}\}$  NMR (100 MHz,  $\text{CDCl}_3$ ) spectrum of compound **31**

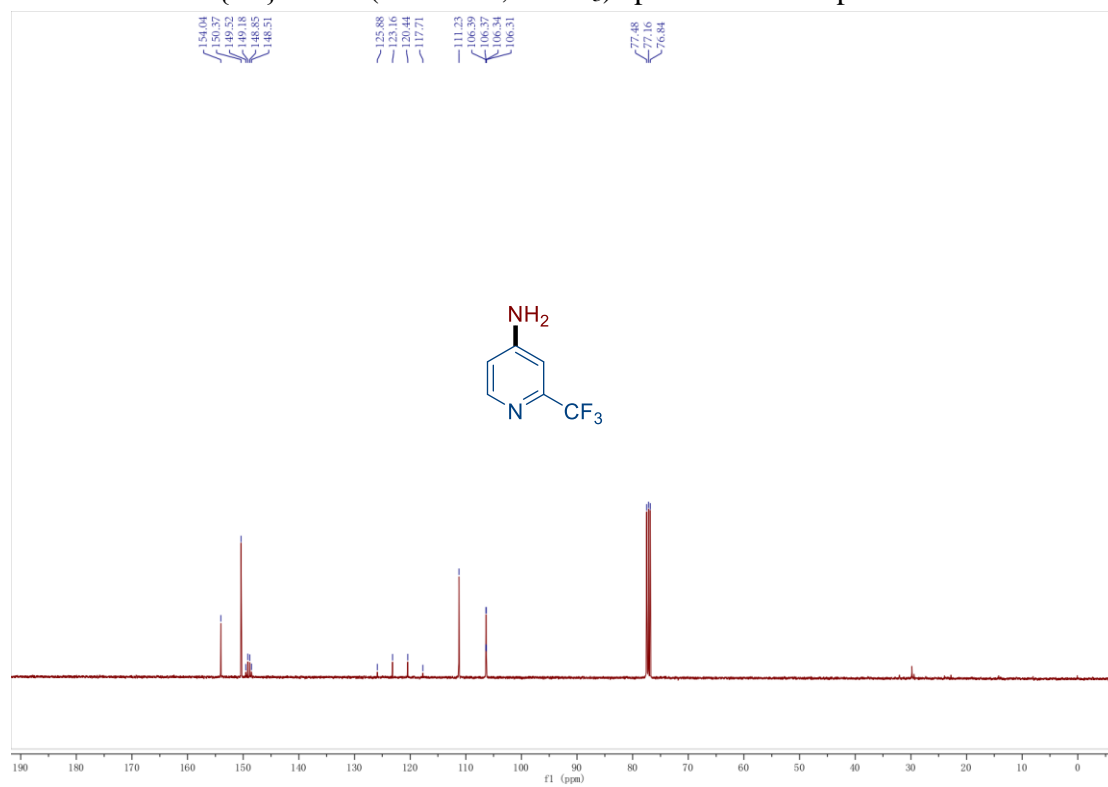

$^{19}\text{F}$  NMR (376 MHz,  $\text{CDCl}_3$ ) spectrum of compound **31**

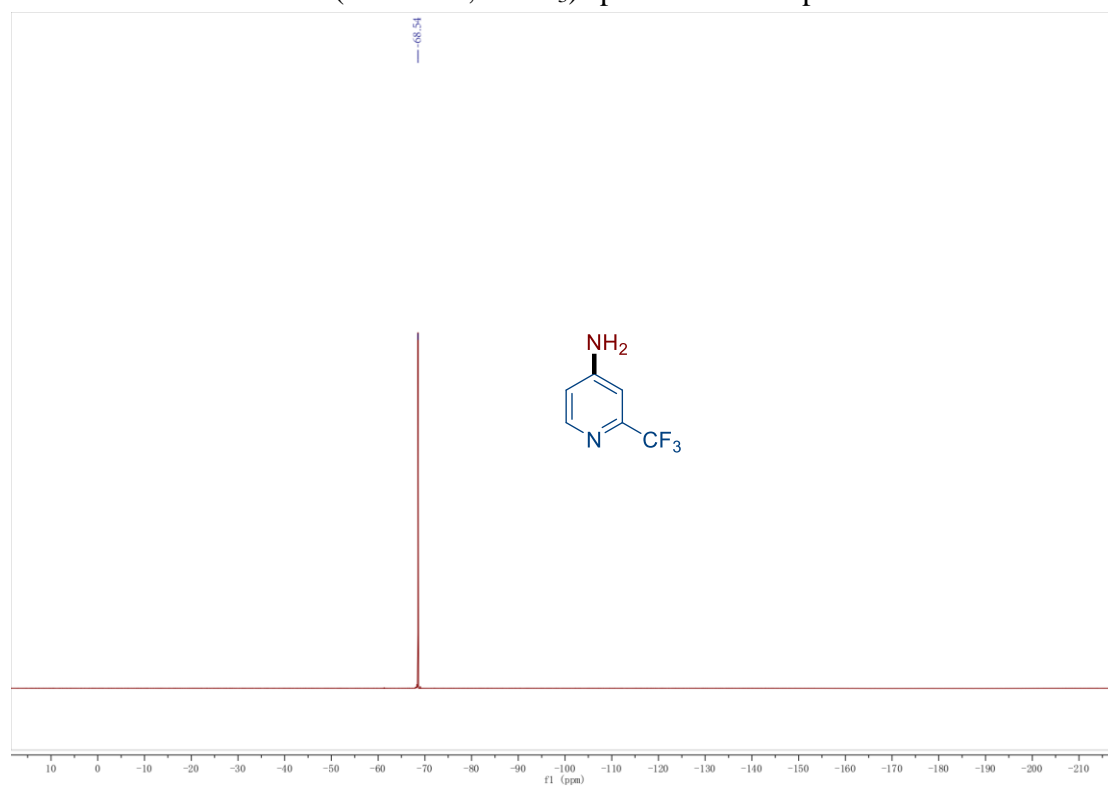

$^1\text{H}$  NMR (400 MHz,  $\text{CDCl}_3$ ) spectrum of compound **32**

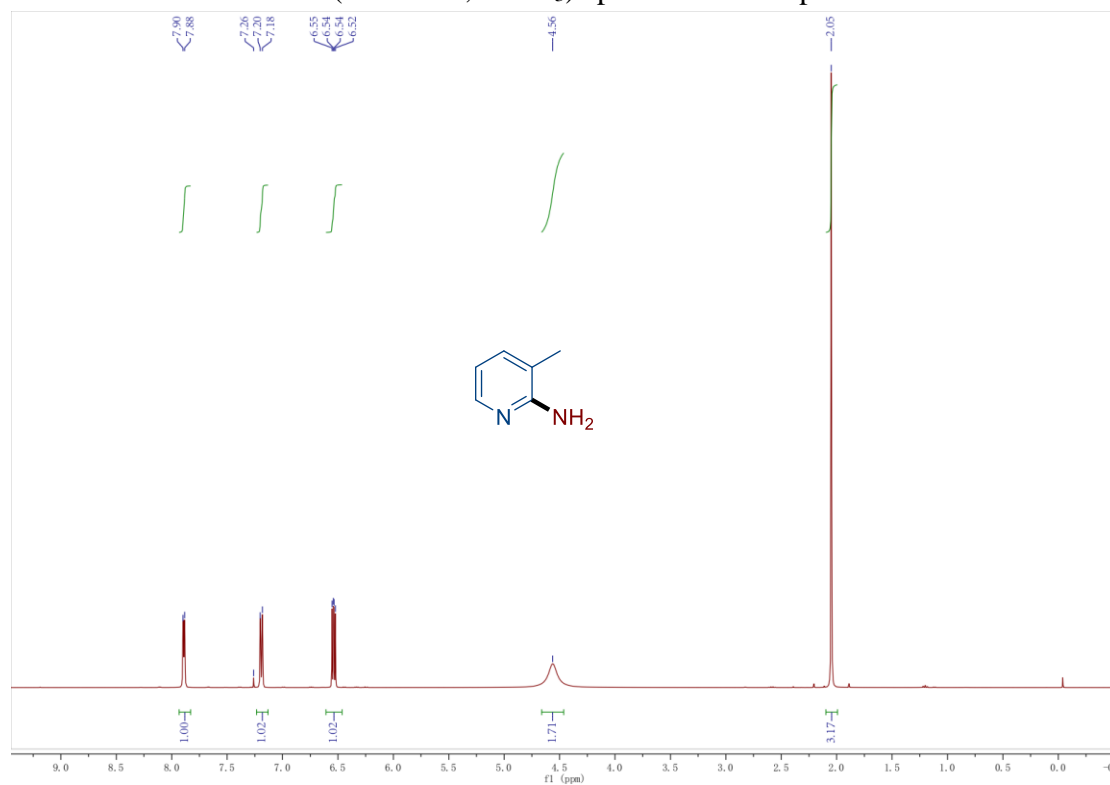

$^{13}\text{C}\{^1\text{H}\}$  NMR (100 MHz,  $\text{CDCl}_3$ ) spectrum of compound **32**

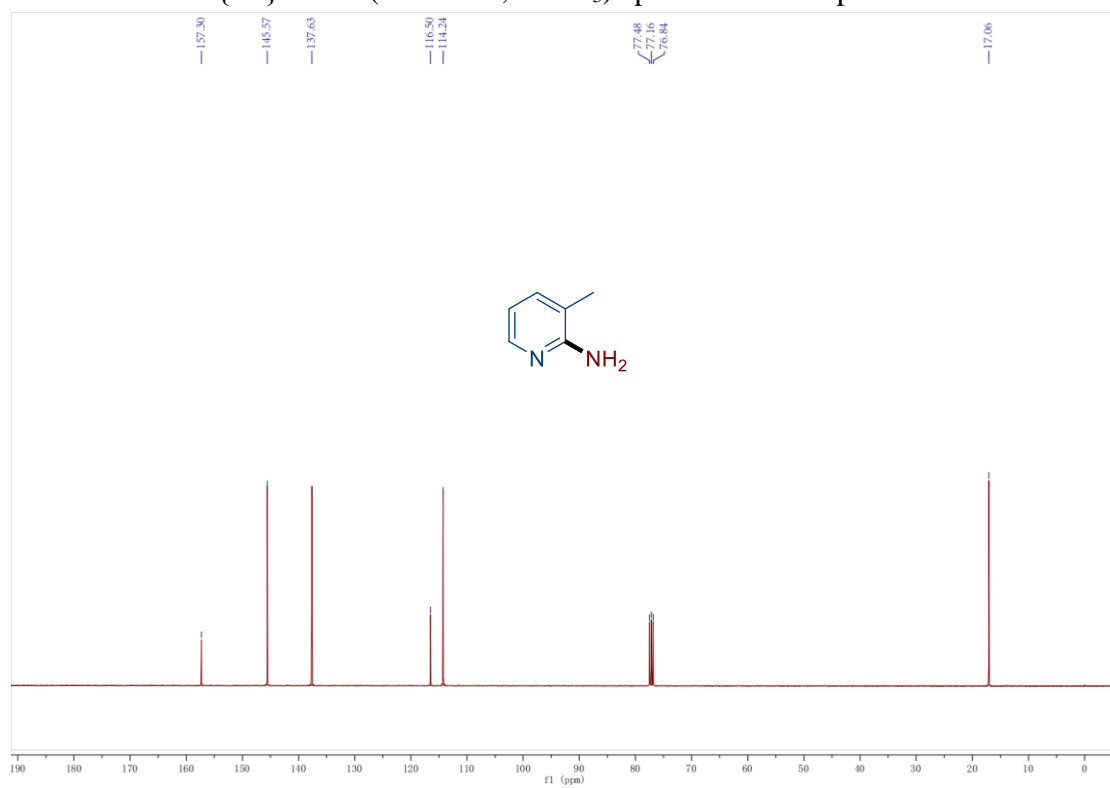

$^1\text{H}$  NMR (400 MHz,  $\text{CDCl}_3$ ) spectrum of compound **33**

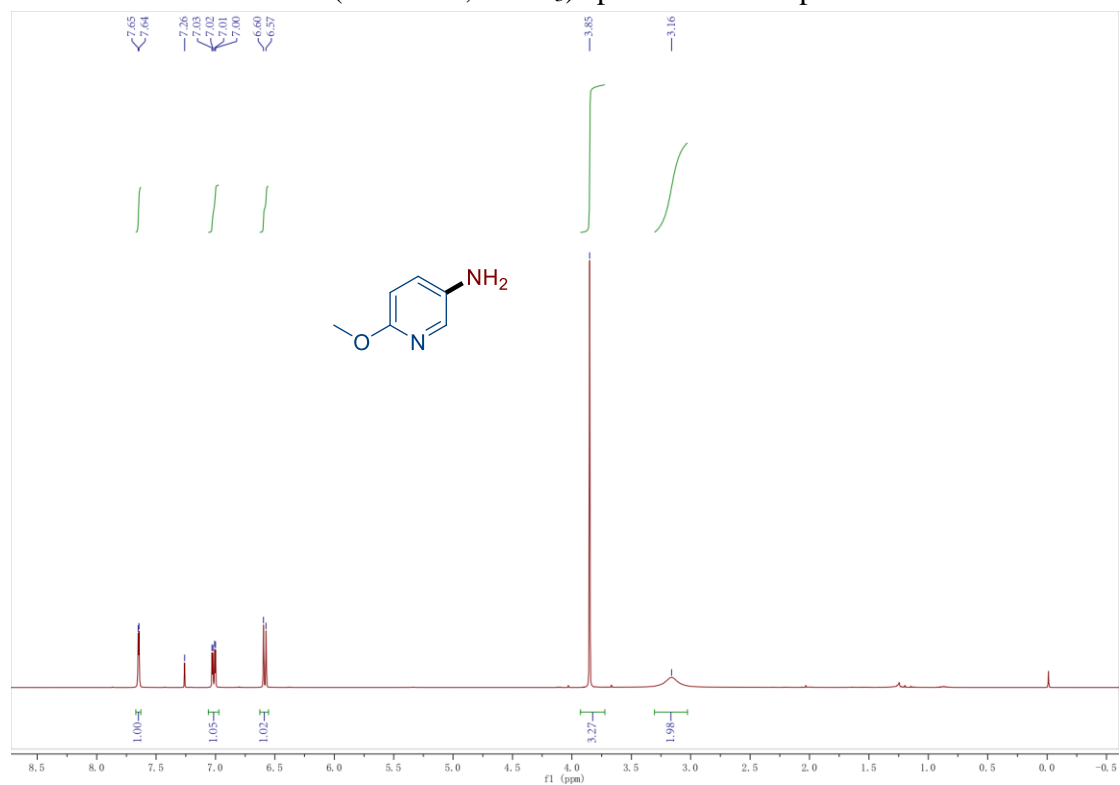

$^{13}\text{C}\{^1\text{H}\}$  NMR (100 MHz,  $\text{CDCl}_3$ ) spectrum of compound **33**

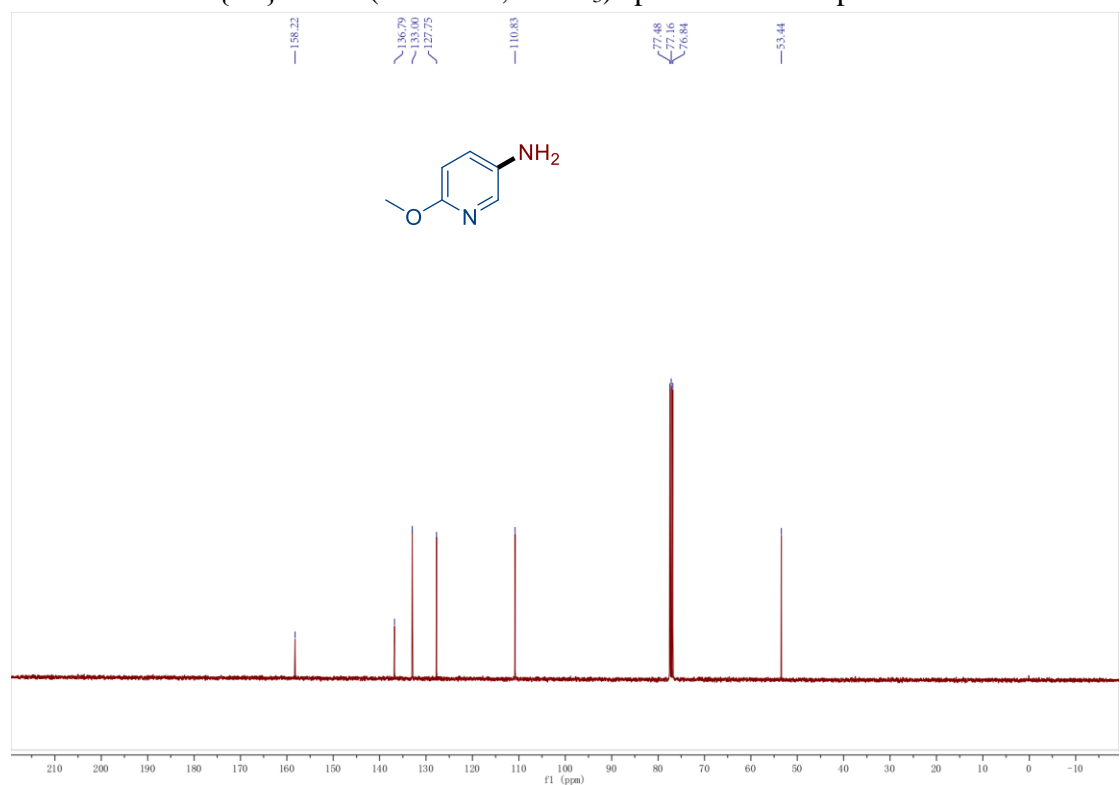



$^1\text{H}$  NMR (400 MHz,  $\text{CDCl}_3$ ) spectrum of compound **34**

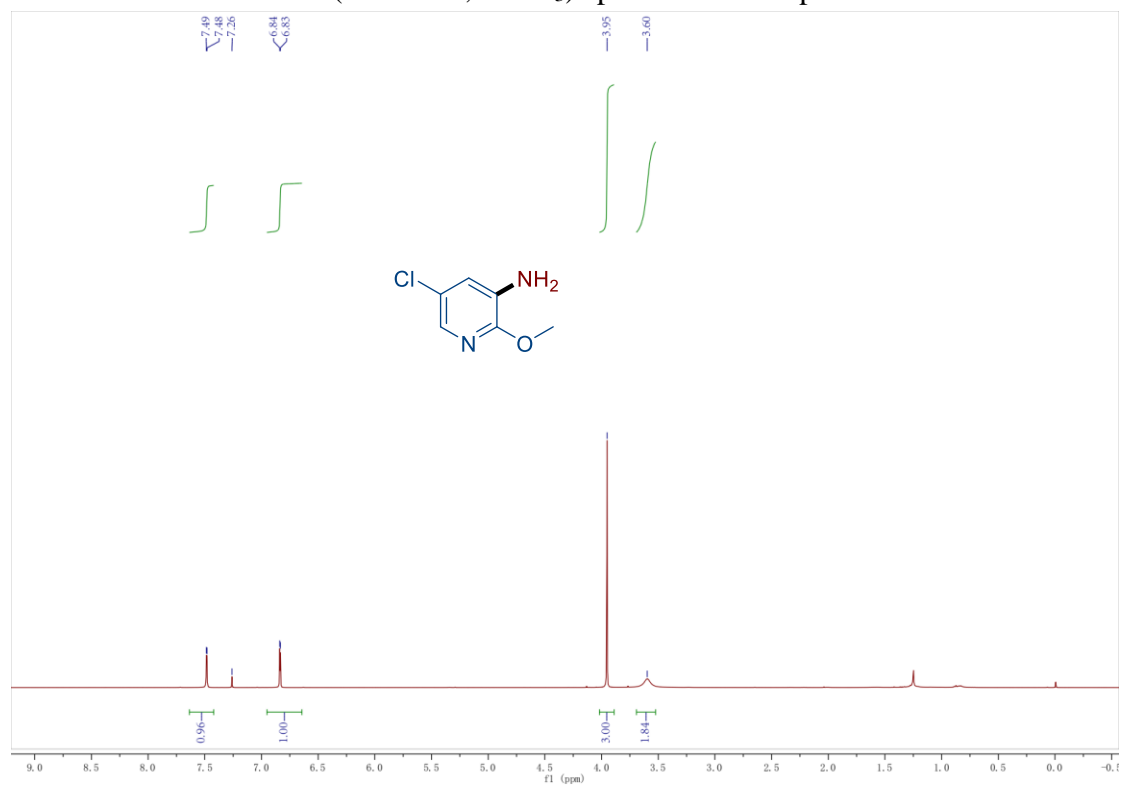

$^{13}\text{C}\{^1\text{H}\}$  NMR (100 MHz,  $\text{CDCl}_3$ ) spectrum of compound **34**

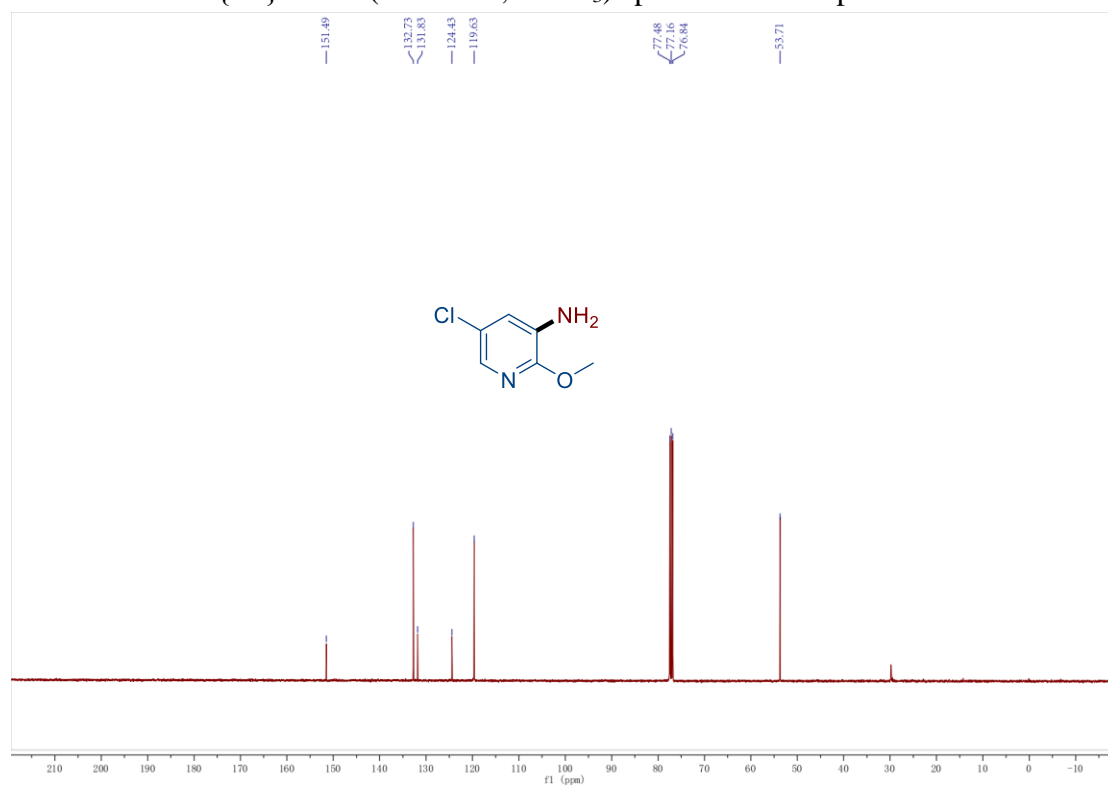

$^1\text{H}$  NMR (400 MHz,  $\text{CDCl}_3$ ) spectrum of compound **35**

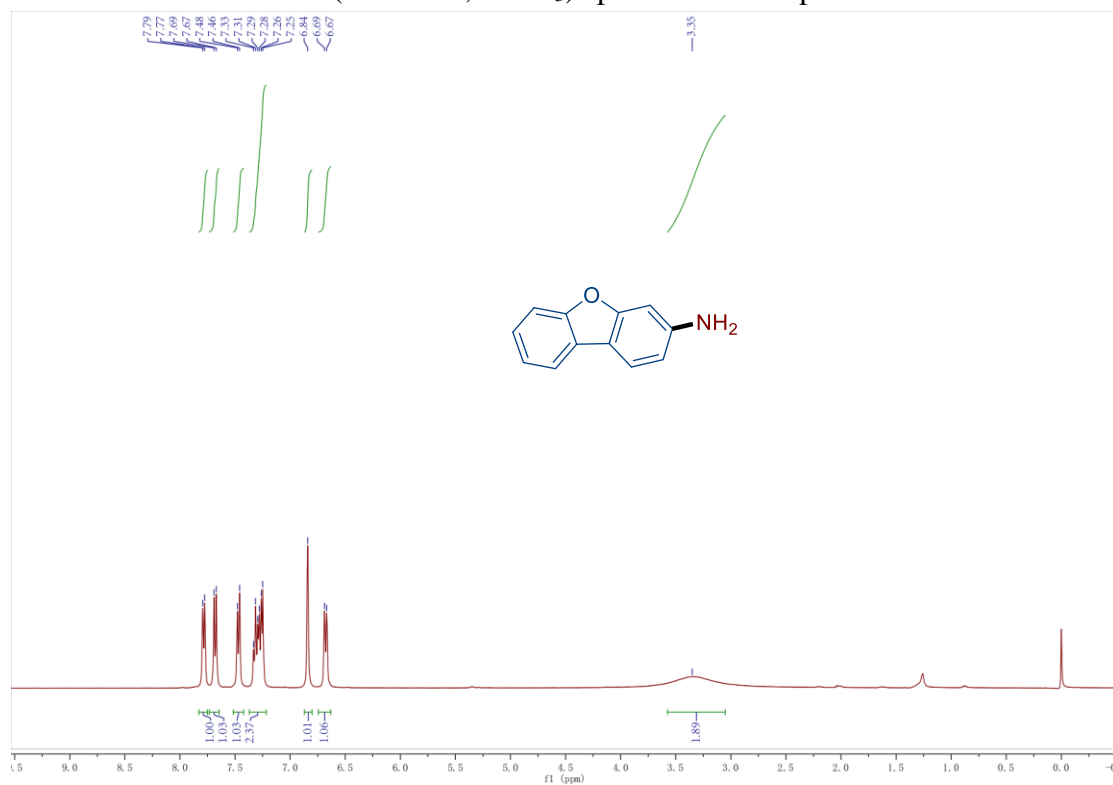

$^{13}\text{C}\{^1\text{H}\}$  NMR (100 MHz,  $\text{CDCl}_3$ ) spectrum of compound **35**

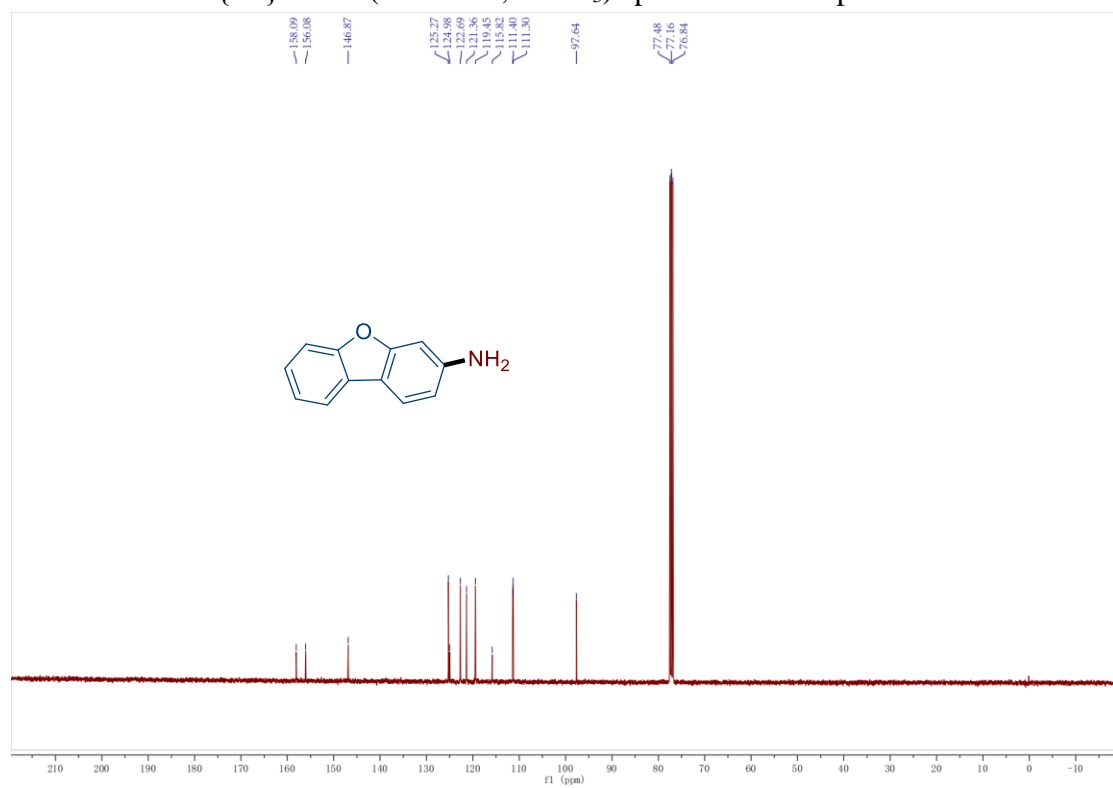

$^1\text{H}$  NMR (400 MHz,  $\text{CDCl}_3$ ) spectrum of compound **36**

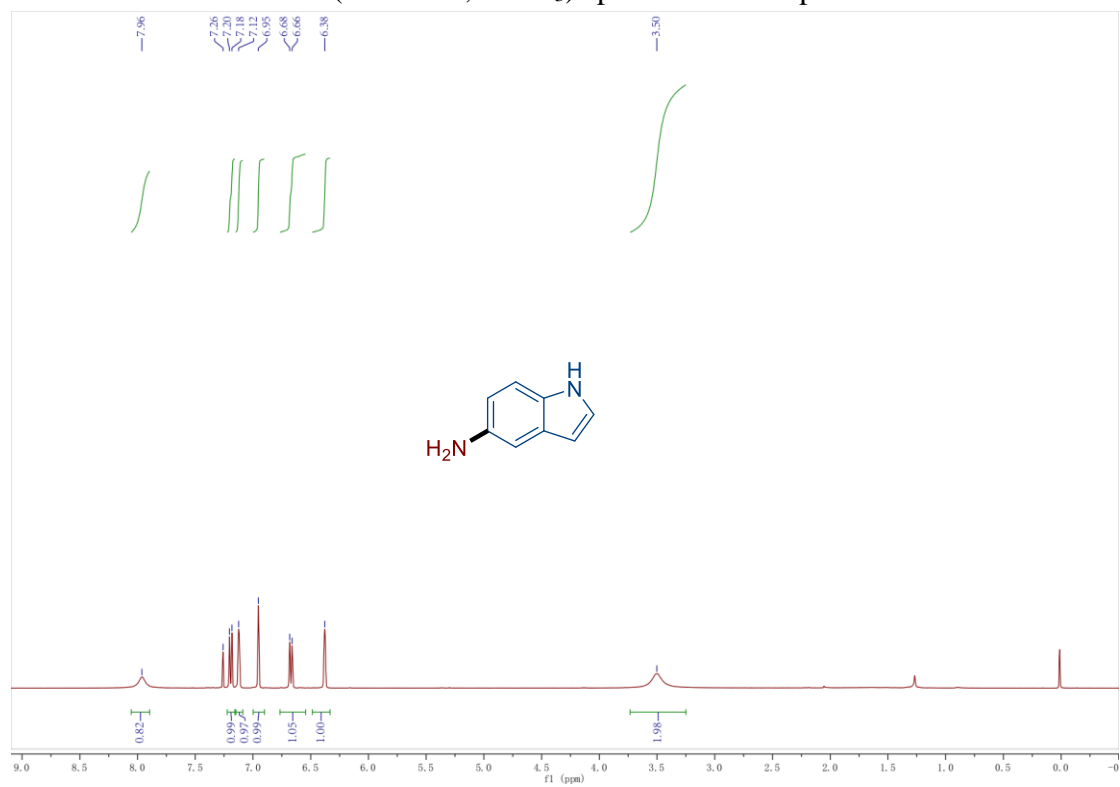

$^{13}\text{C}\{^1\text{H}\}$  NMR (100 MHz,  $\text{CDCl}_3$ ) spectrum of compound **36**

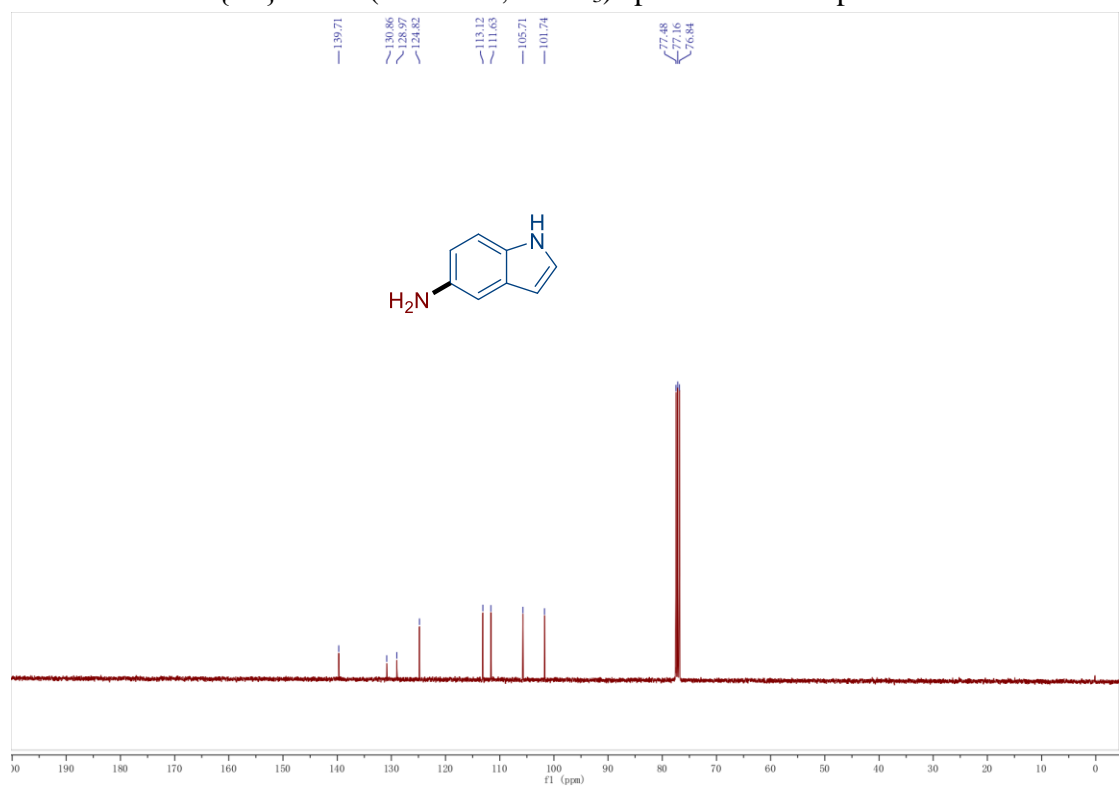

$^1\text{H}$  NMR (400 MHz,  $\text{CDCl}_3$ ) spectrum of compound **37**

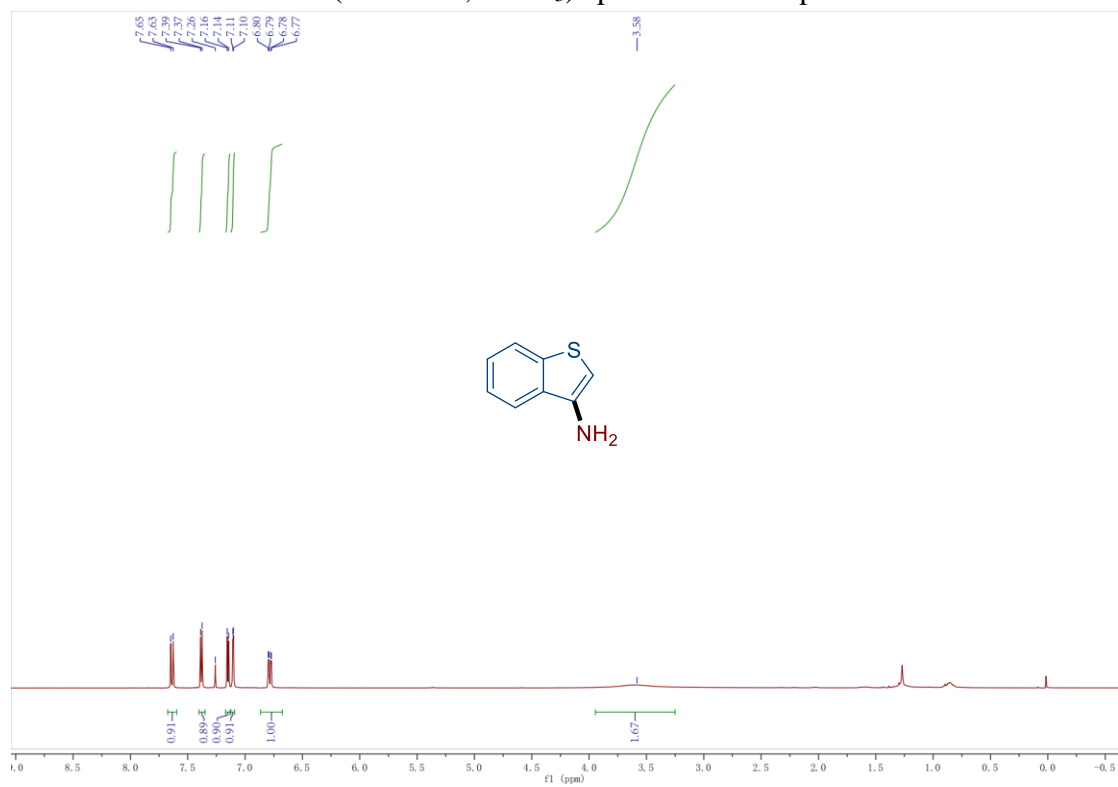

$^{13}\text{C}\{^1\text{H}\}$  NMR (100 MHz,  $\text{CDCl}_3$ ) spectrum of compound **37**

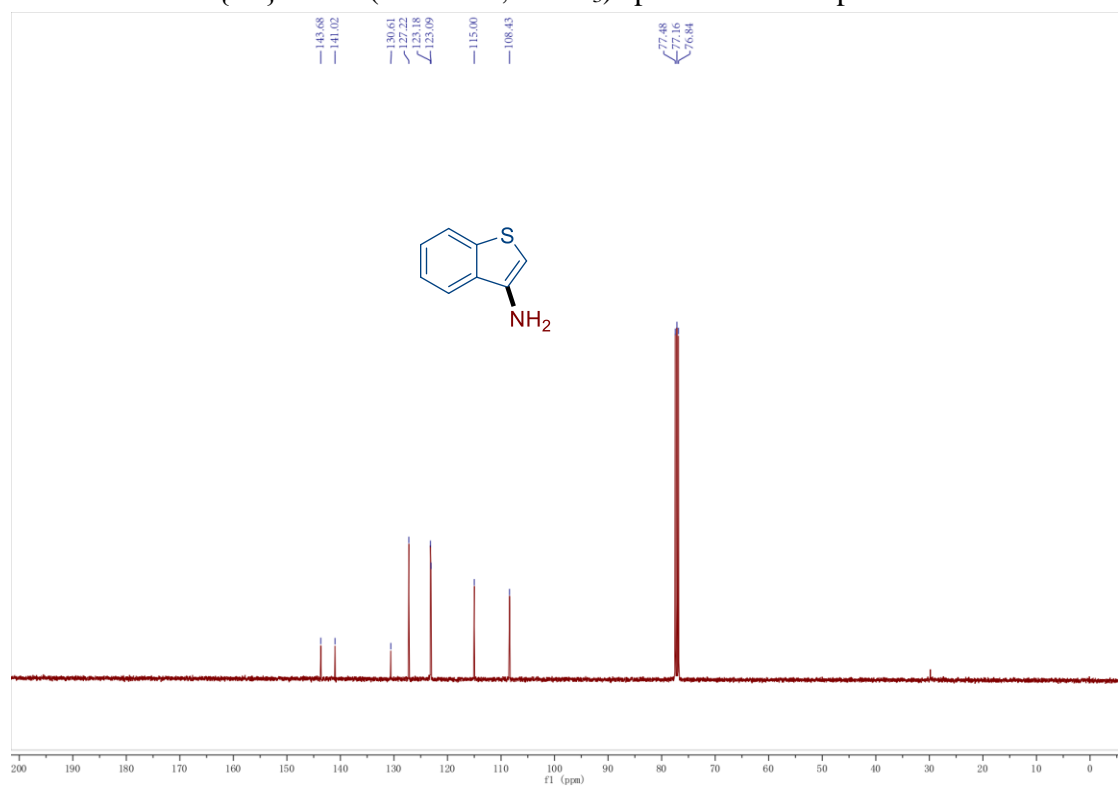

$^1\text{H}$  NMR (400 MHz,  $\text{CDCl}_3$ ) spectrum of compound **38**

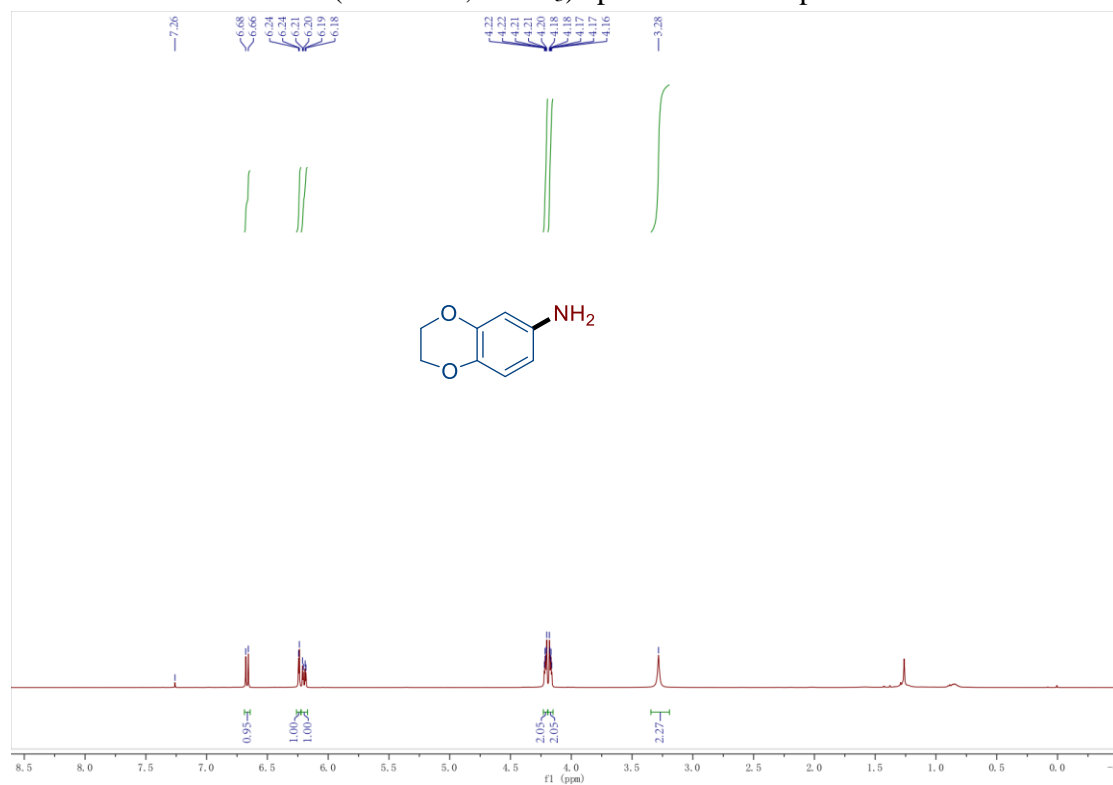

$^{13}\text{C}\{^1\text{H}\}$  NMR (100 MHz,  $\text{CDCl}_3$ ) spectrum of compound **38**

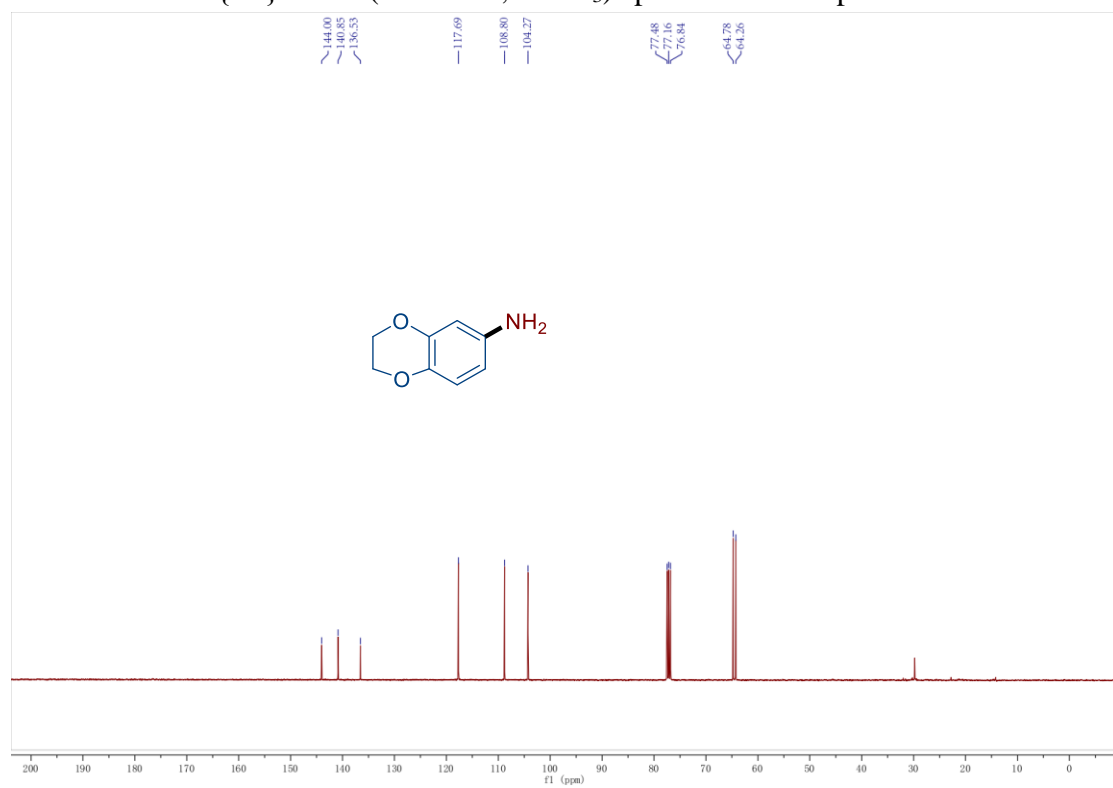

$^1\text{H}$  NMR (400 MHz,  $\text{DMSO-}d_6$ ) spectrum of compound **39**

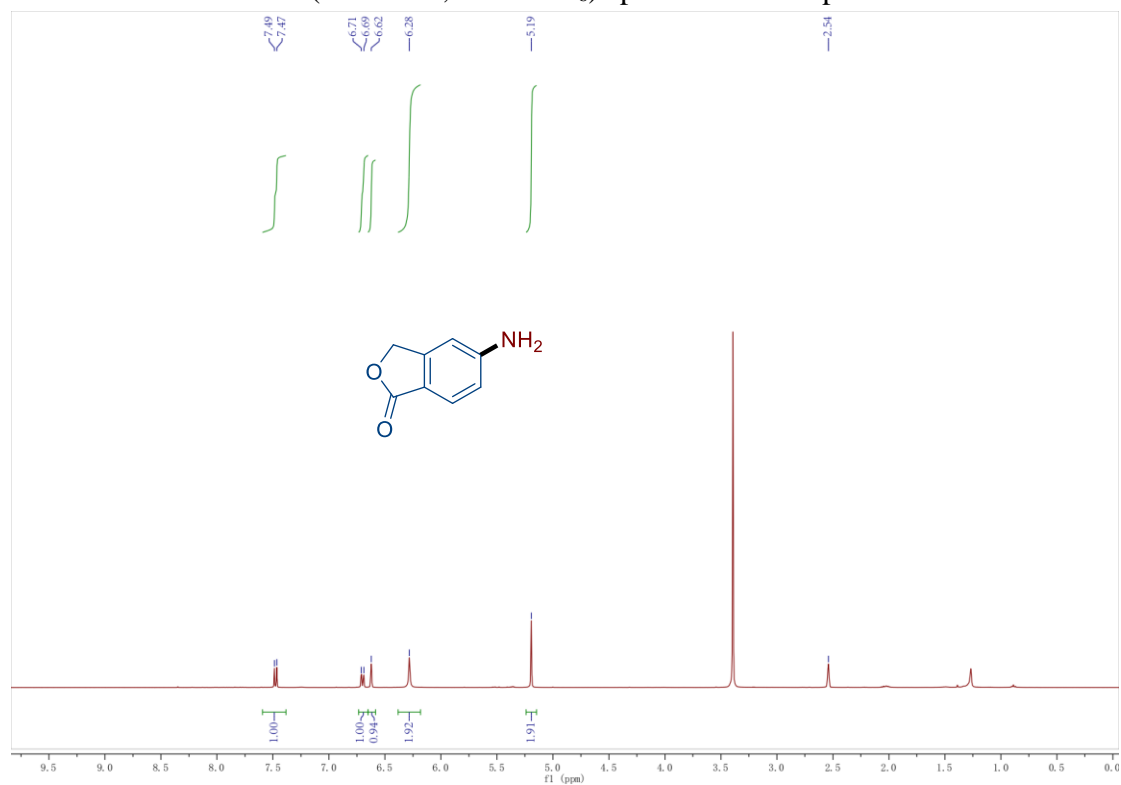

$^{13}\text{C}\{^1\text{H}\}$  NMR (100 MHz,  $\text{DMSO-}d_6$ ) spectrum of compound **39**

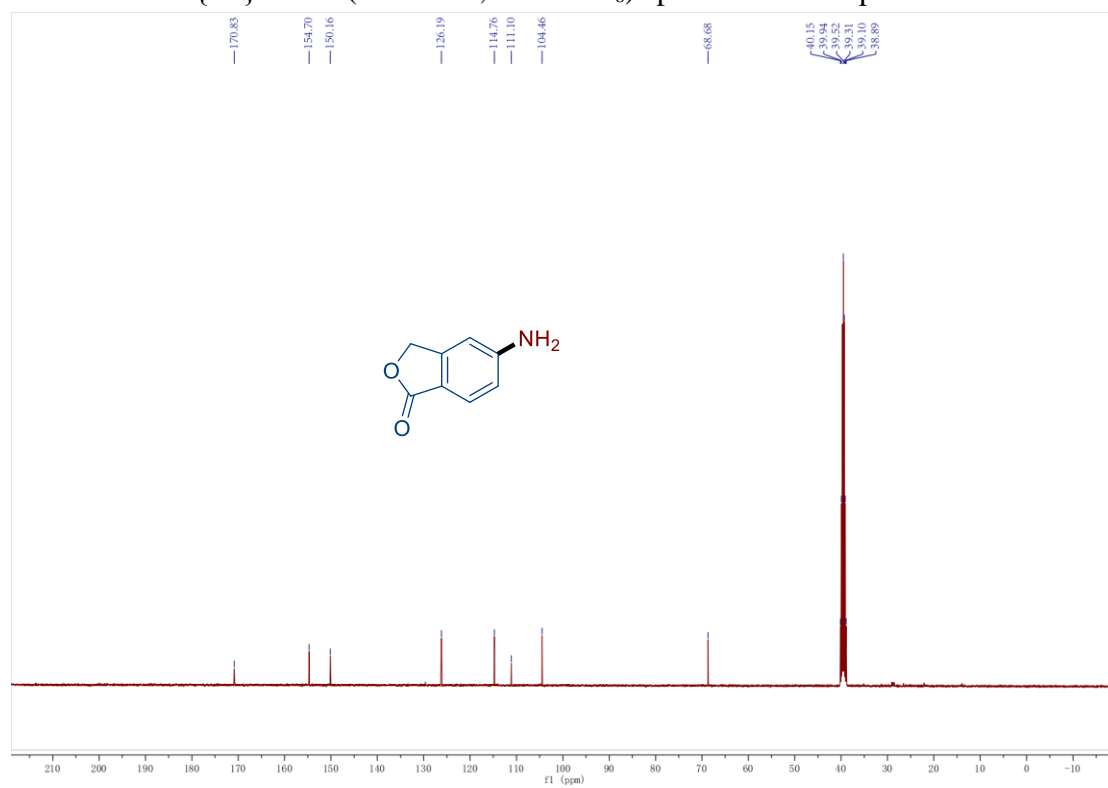

$^1\text{H}$  NMR (400 MHz,  $\text{CDCl}_3$ ) spectrum of compound **40**

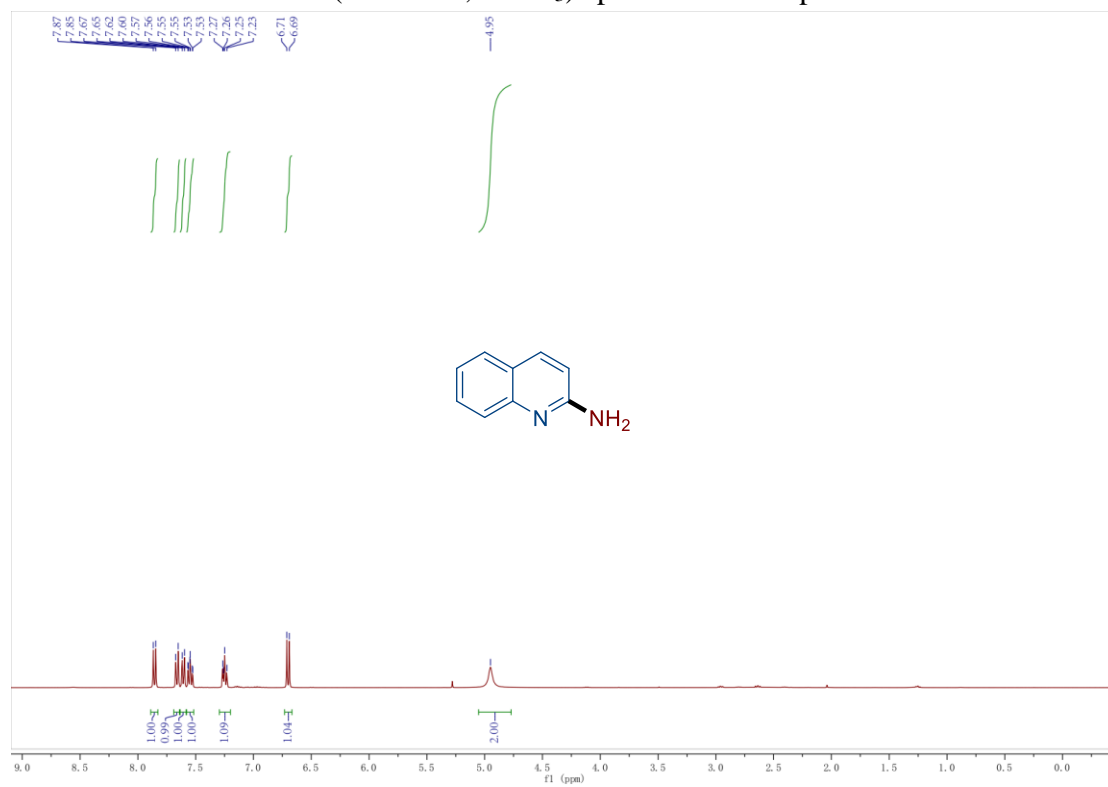

$^{13}\text{C}\{^1\text{H}\}$  NMR (100 MHz,  $\text{CDCl}_3$ ) spectrum of compound **40**

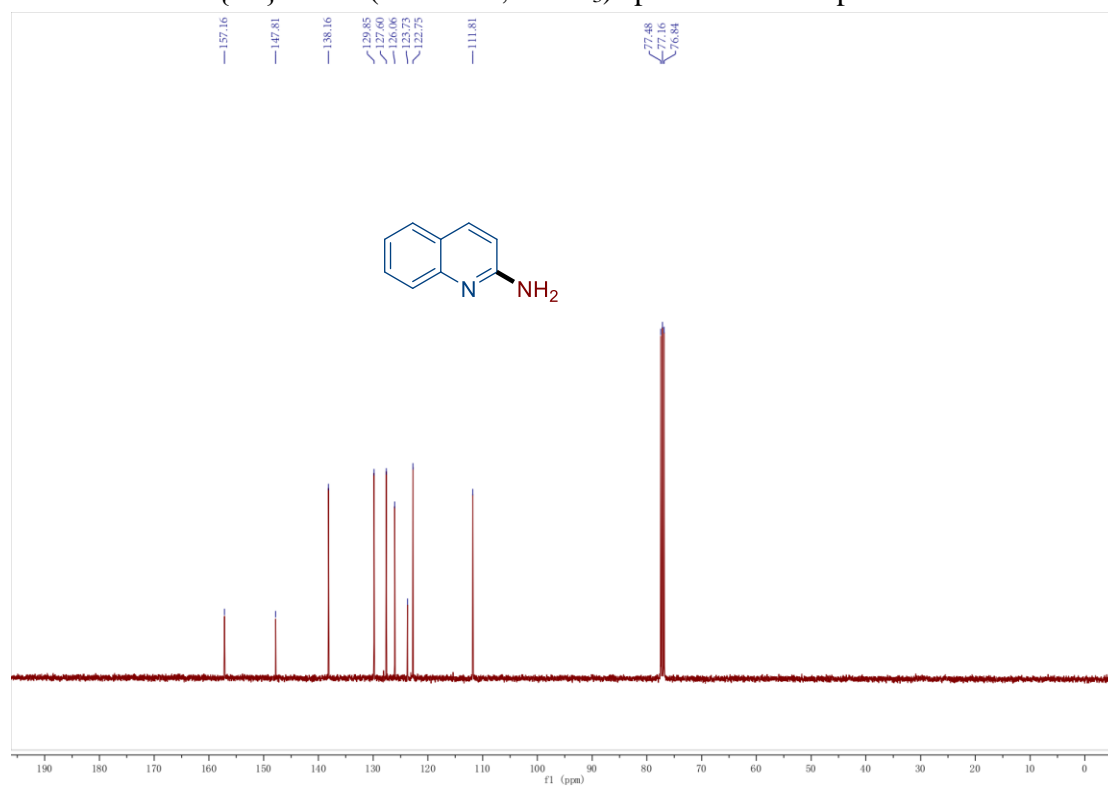

$^1\text{H}$  NMR (400 MHz,  $\text{CDCl}_3$ ) spectrum of compound **41**

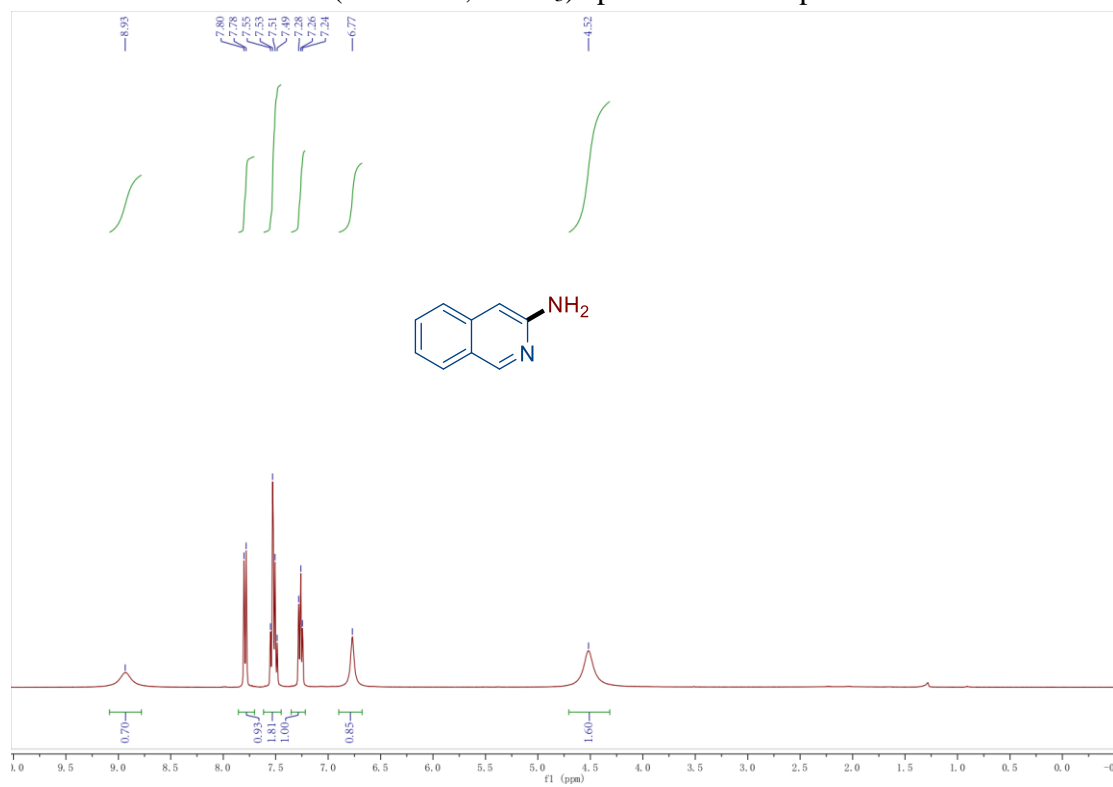

$^{13}\text{C}\{^1\text{H}\}$  NMR (100 MHz,  $\text{CDCl}_3$ ) spectrum of compound **41**

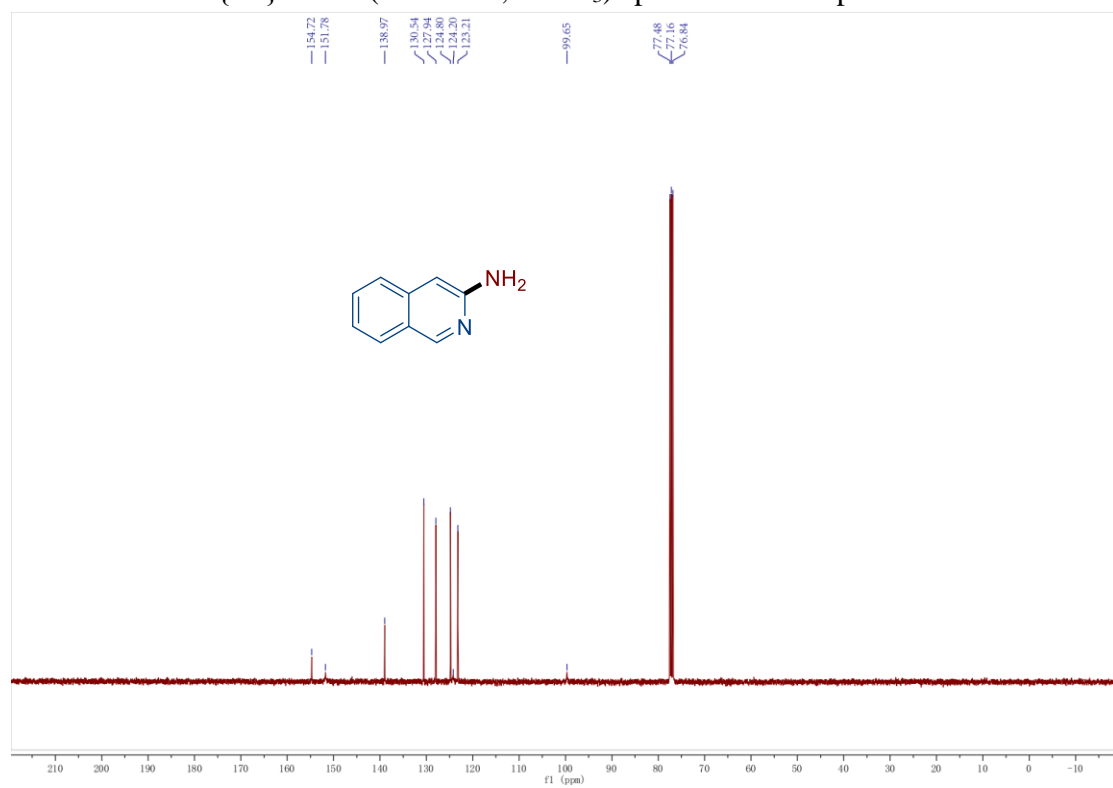



$^1\text{H}$  NMR (400 MHz,  $\text{CDCl}_3$ ) spectrum of compound **42**

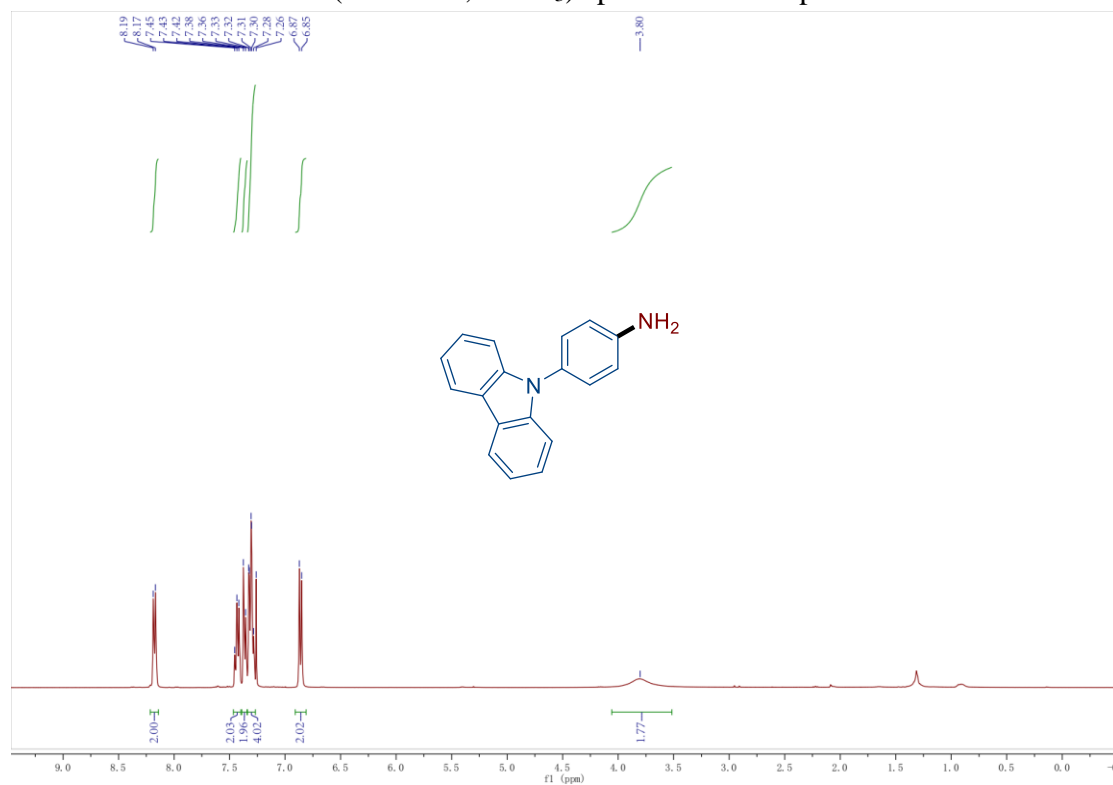

$^{13}\text{C}\{^1\text{H}\}$  NMR (100 MHz,  $\text{CDCl}_3$ ) spectrum of compound **42**

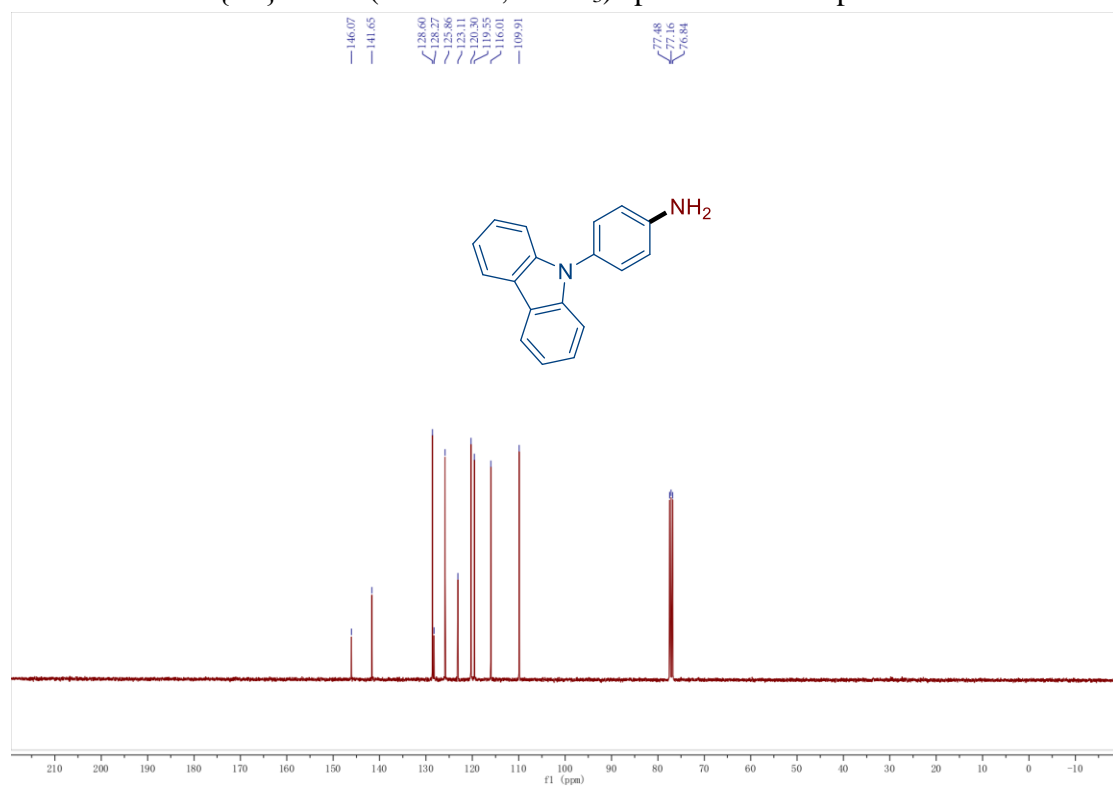

$^1\text{H}$  NMR (400 MHz,  $\text{CDCl}_3$ ) spectrum of compound **76**

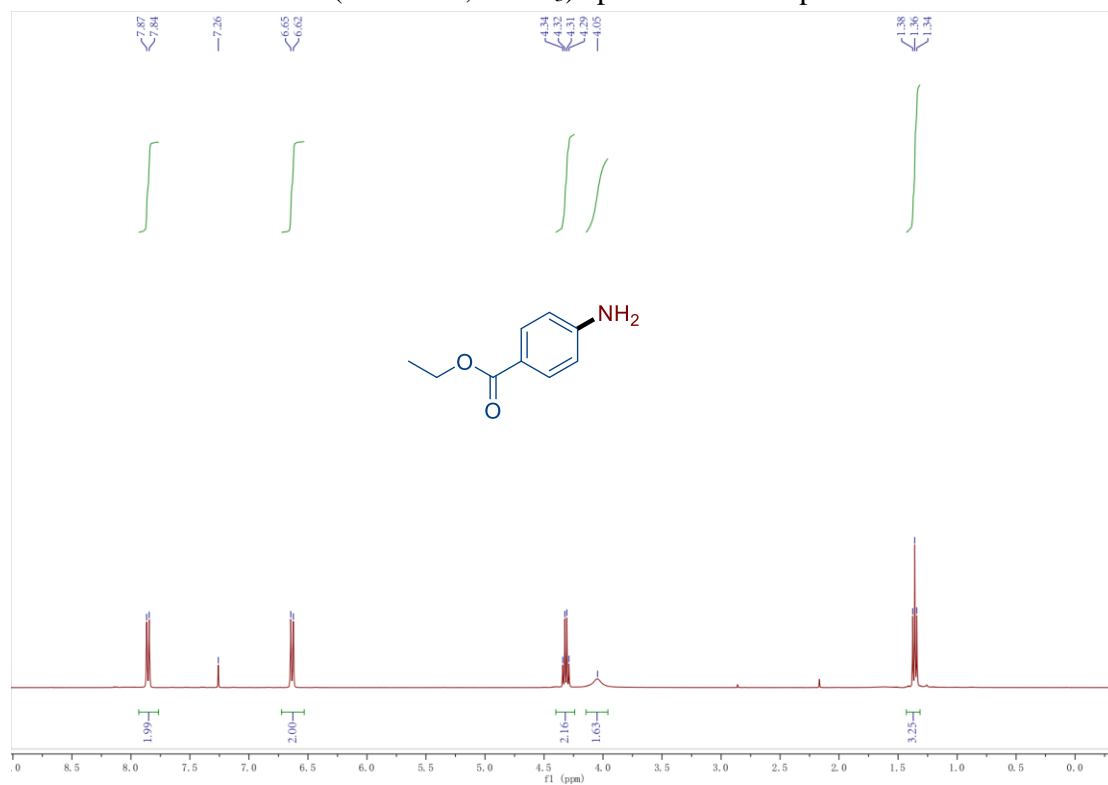

$^{13}\text{C}\{^1\text{H}\}$  NMR (100 MHz,  $\text{CDCl}_3$ ) spectrum of compound **76**

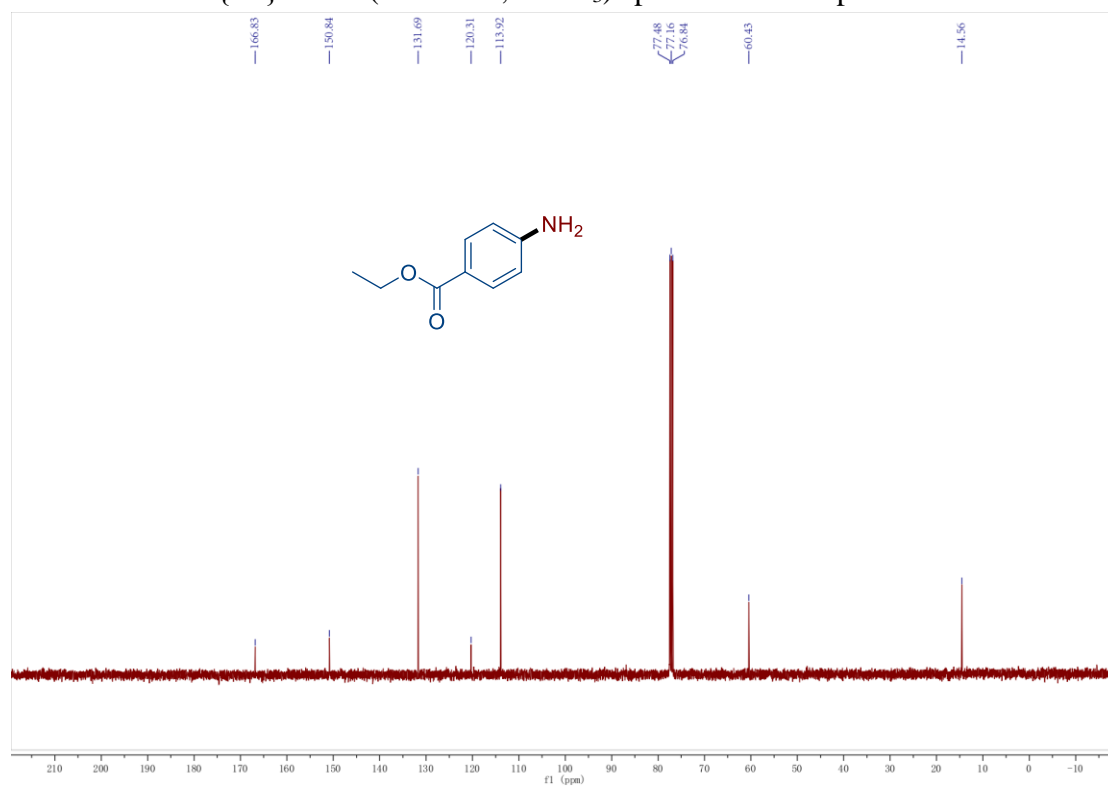

$^1\text{H}$  NMR (400 MHz,  $\text{CDCl}_3$ ) spectrum of compound **45**

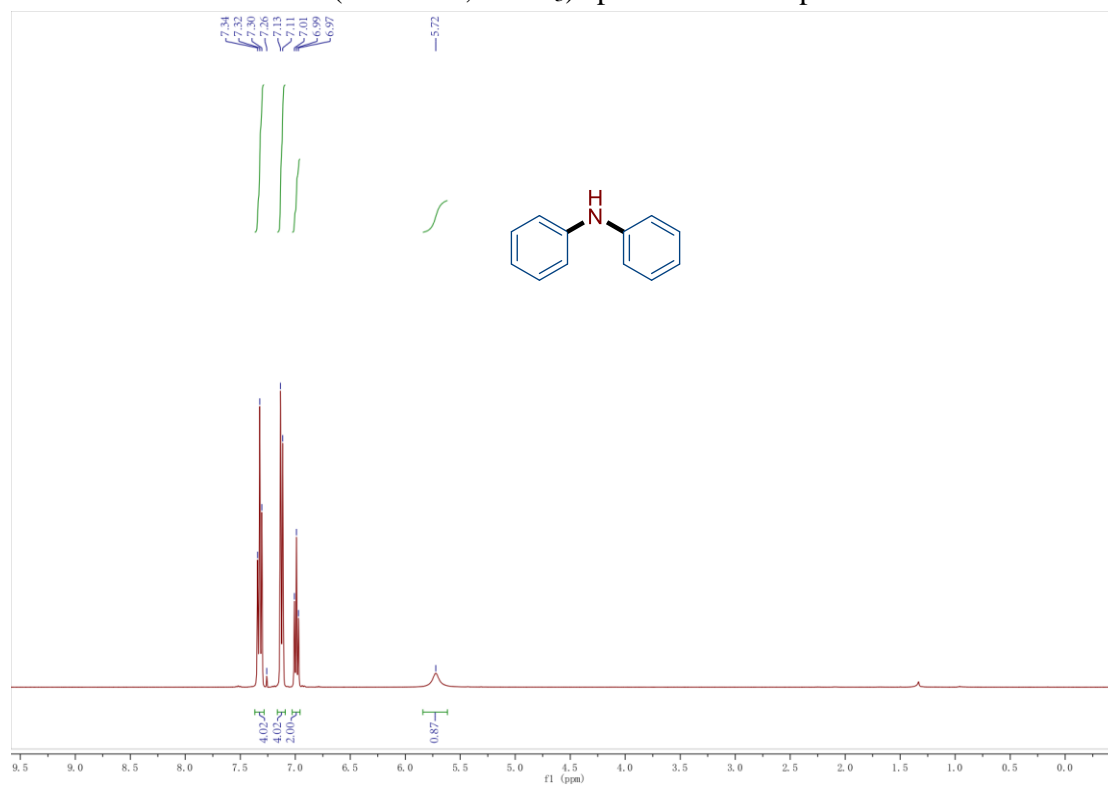

$^{13}\text{C}\{^1\text{H}\}$  NMR (100 MHz,  $\text{CDCl}_3$ ) spectrum of compound **45**

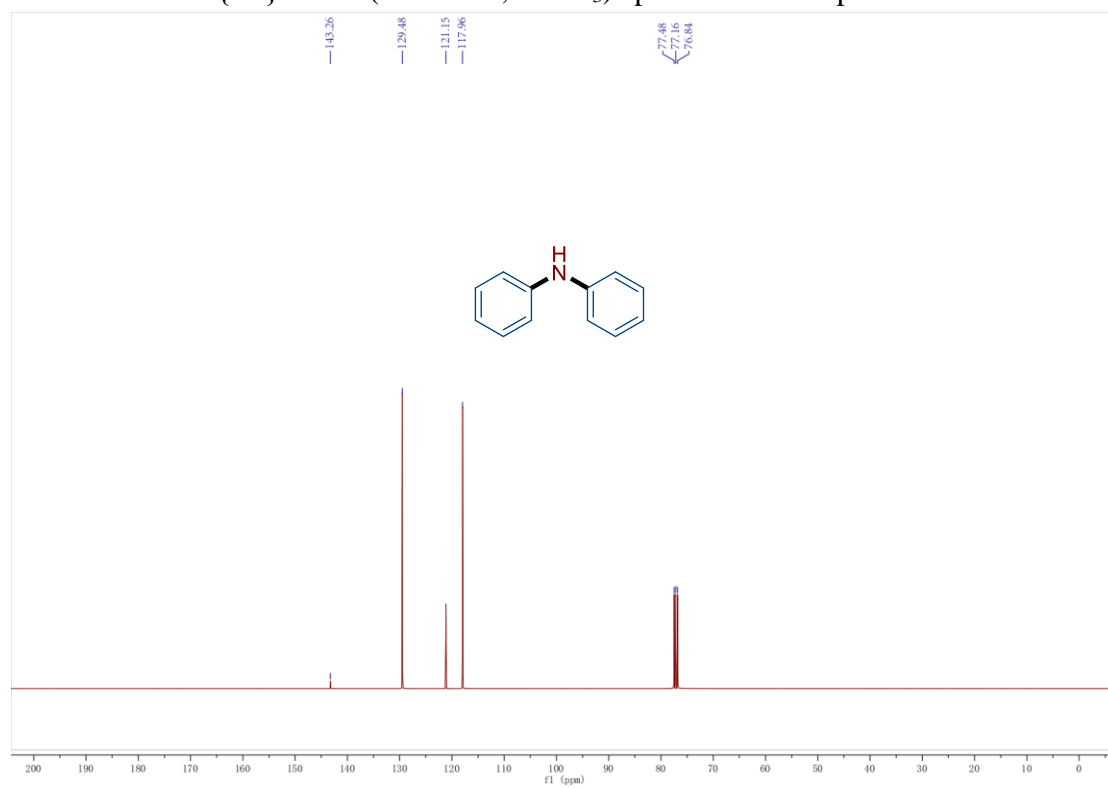

$^1\text{H}$  NMR (400 MHz,  $\text{CDCl}_3$ ) spectrum of compound **46**

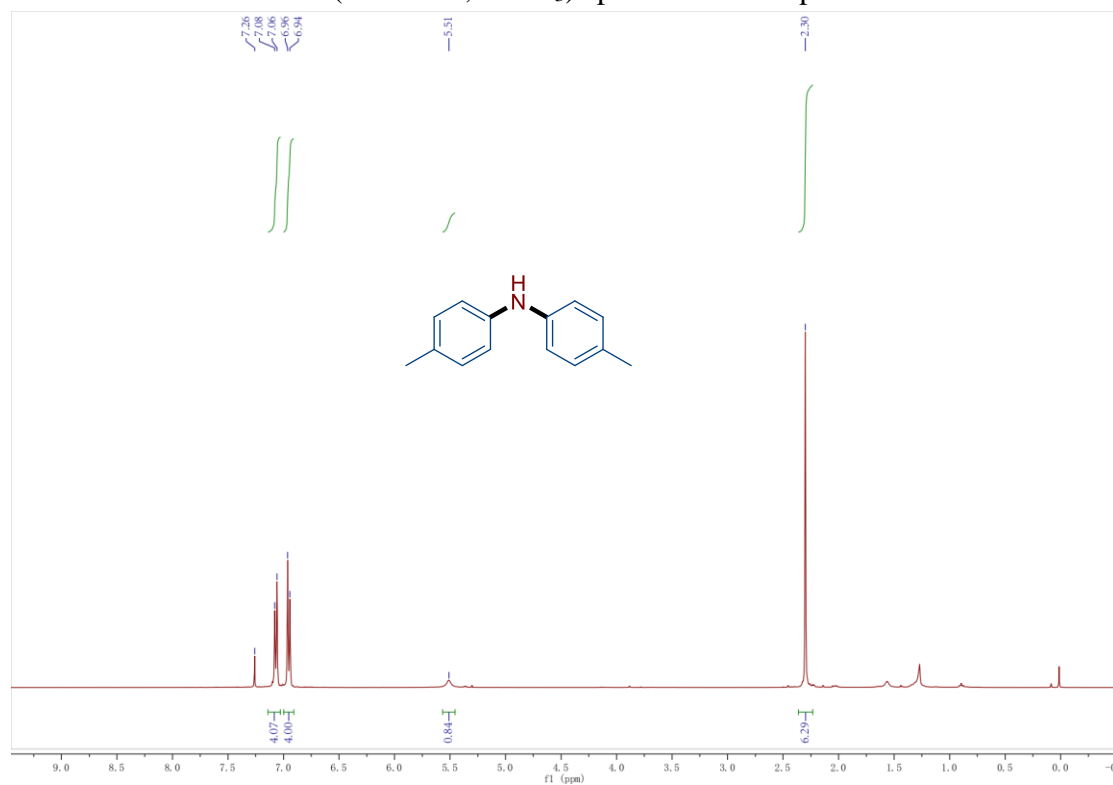

$^{13}\text{C}\{^1\text{H}\}$  NMR (100 MHz,  $\text{CDCl}_3$ ) spectrum of compound **46**

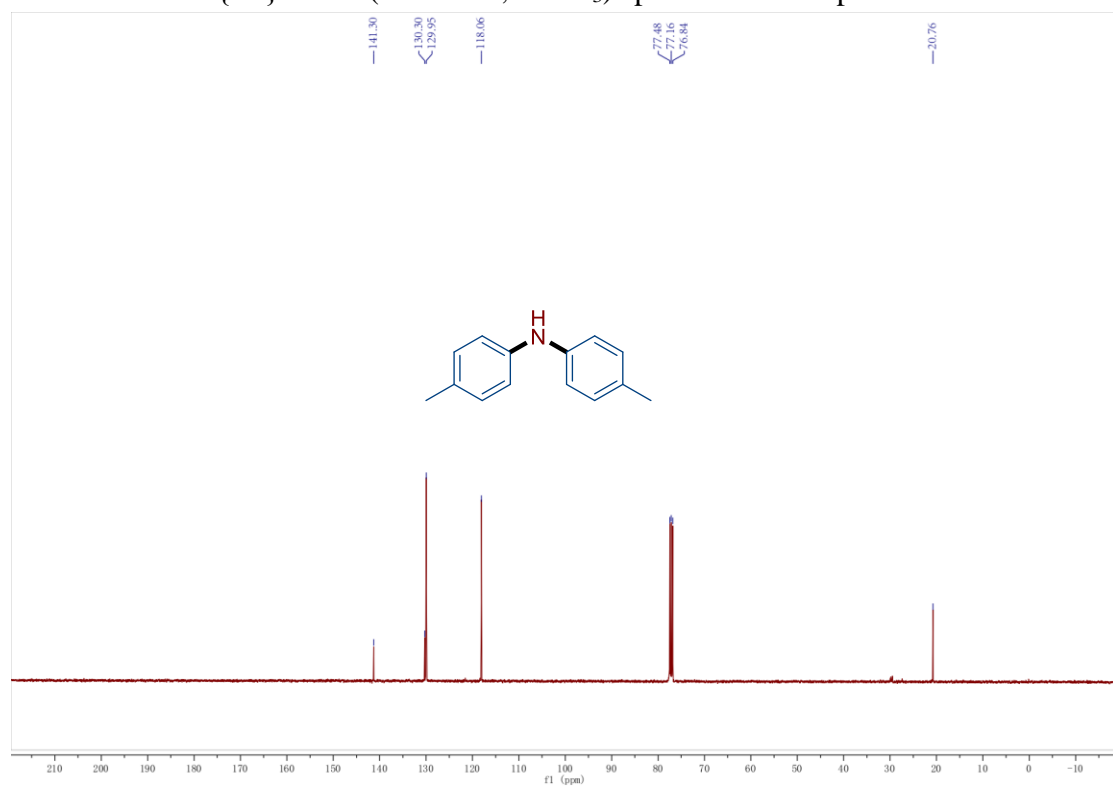

<sup>1</sup>H NMR (400 MHz, CDCl<sub>3</sub>) spectrum of compound **47**

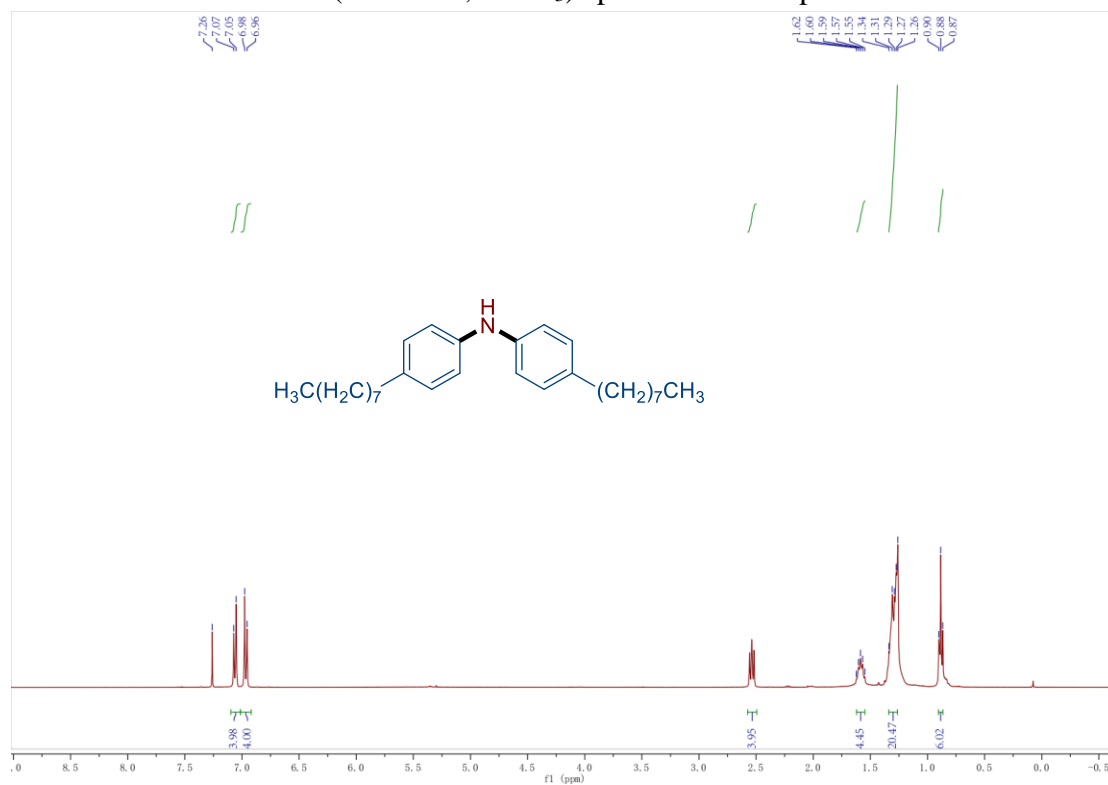

<sup>13</sup>C {<sup>1</sup>H} NMR (100 MHz, CDCl<sub>3</sub>) spectrum of compound **47**

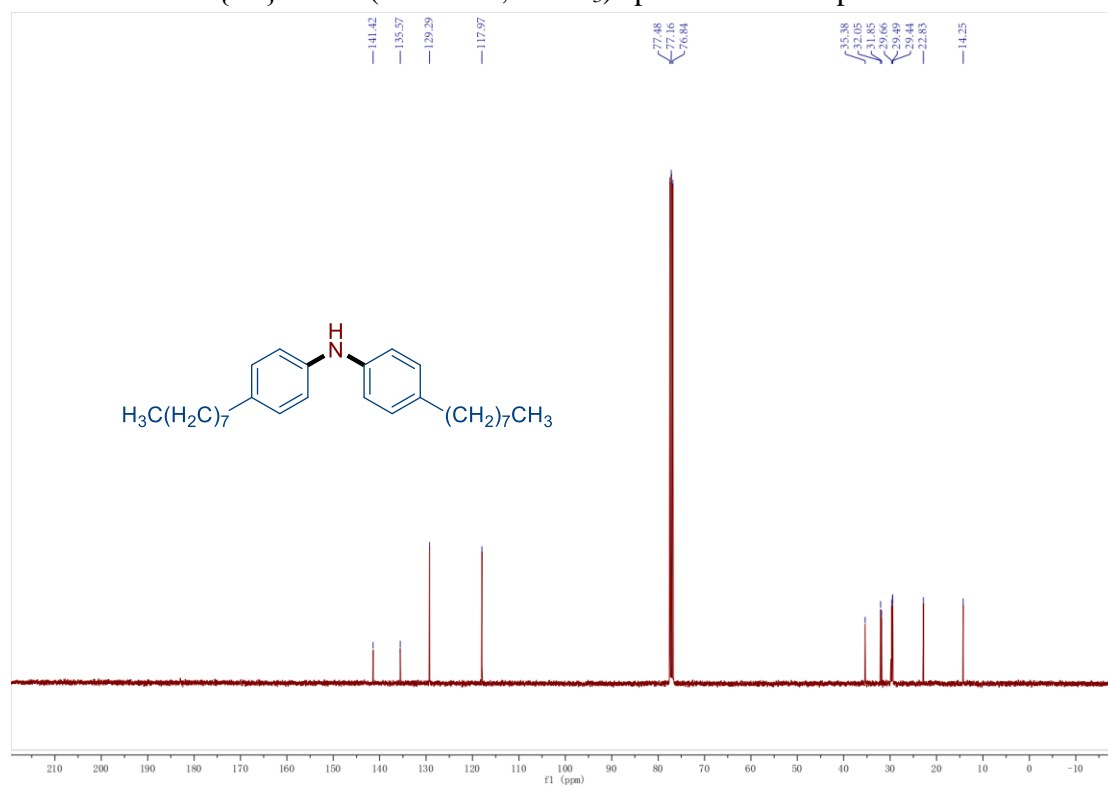

<sup>1</sup>H NMR (400 MHz, CDCl<sub>3</sub>) spectrum of compound **48**

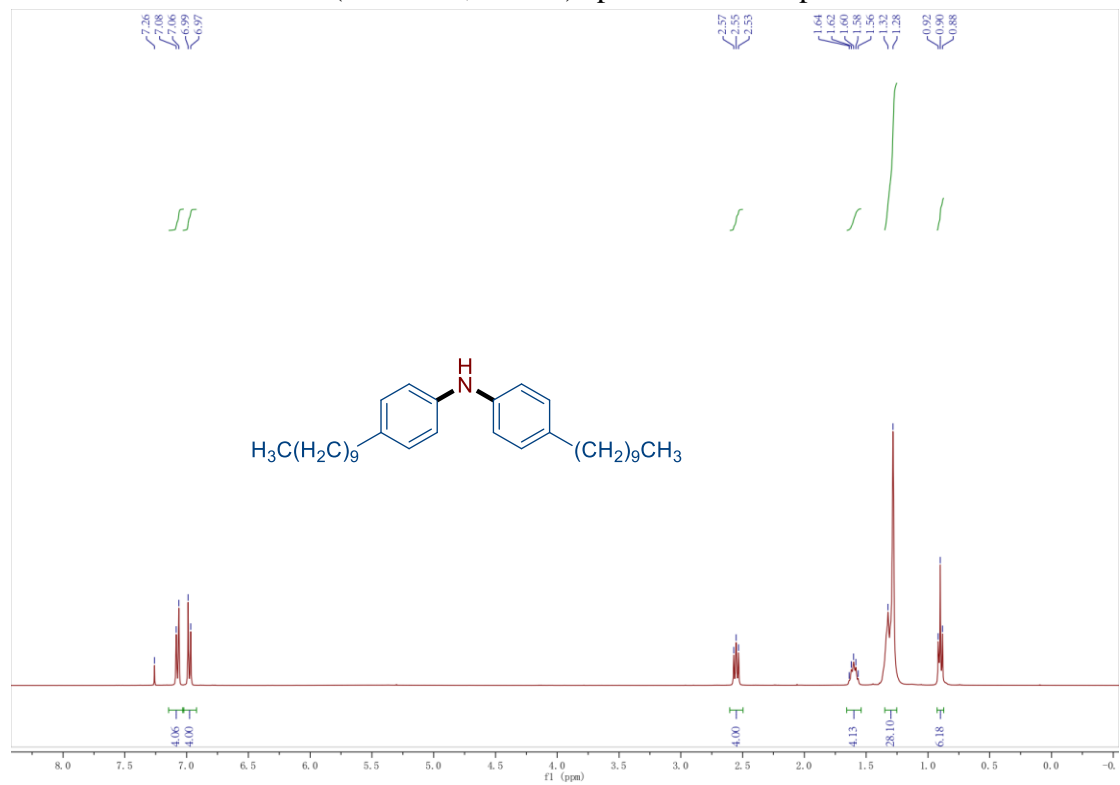

<sup>13</sup>C {<sup>1</sup>H} NMR (100 MHz, CDCl<sub>3</sub>) spectrum of compound **48**

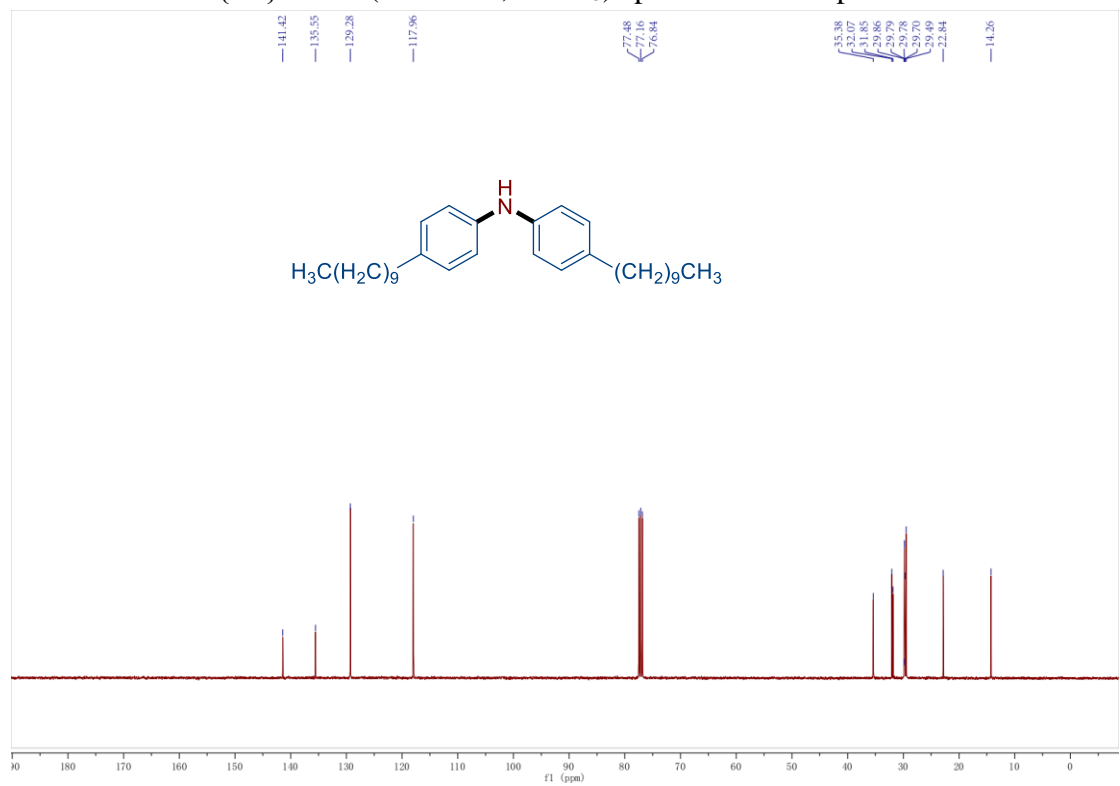

$^1\text{H}$  NMR (400 MHz,  $\text{CDCl}_3$ ) spectrum of compound **49**

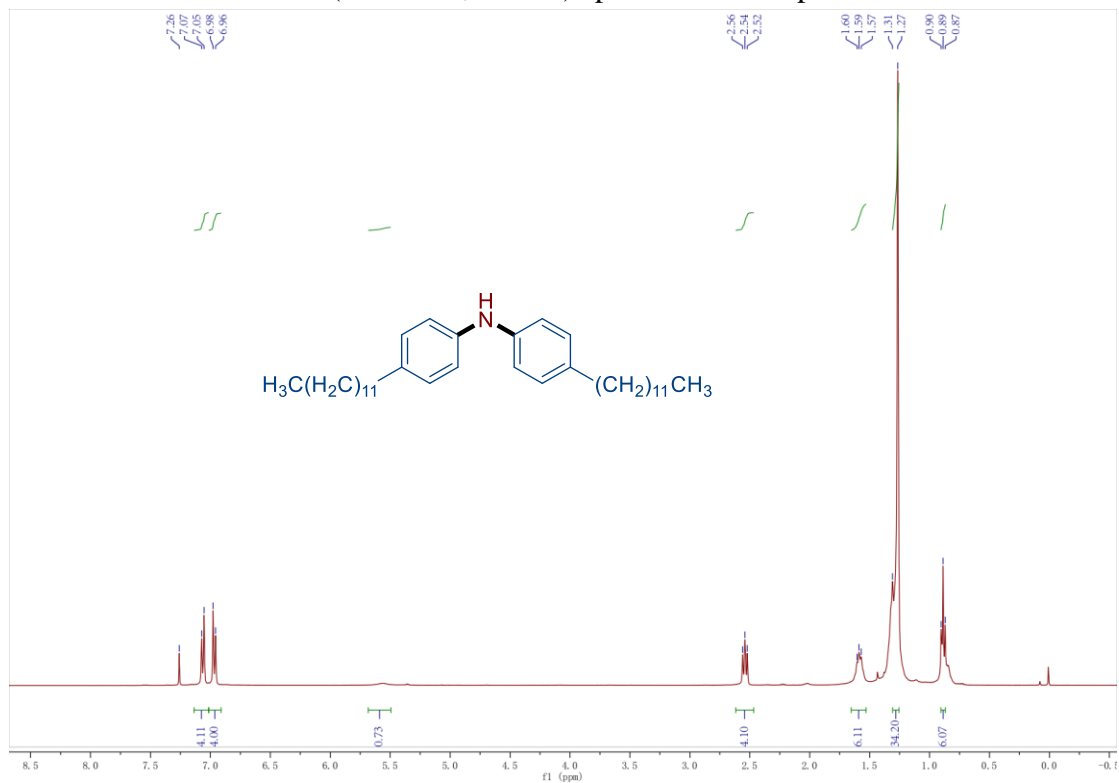

$^{13}\text{C}\{^1\text{H}\}$  NMR (100 MHz,  $\text{CDCl}_3$ ) spectrum of compound **49**

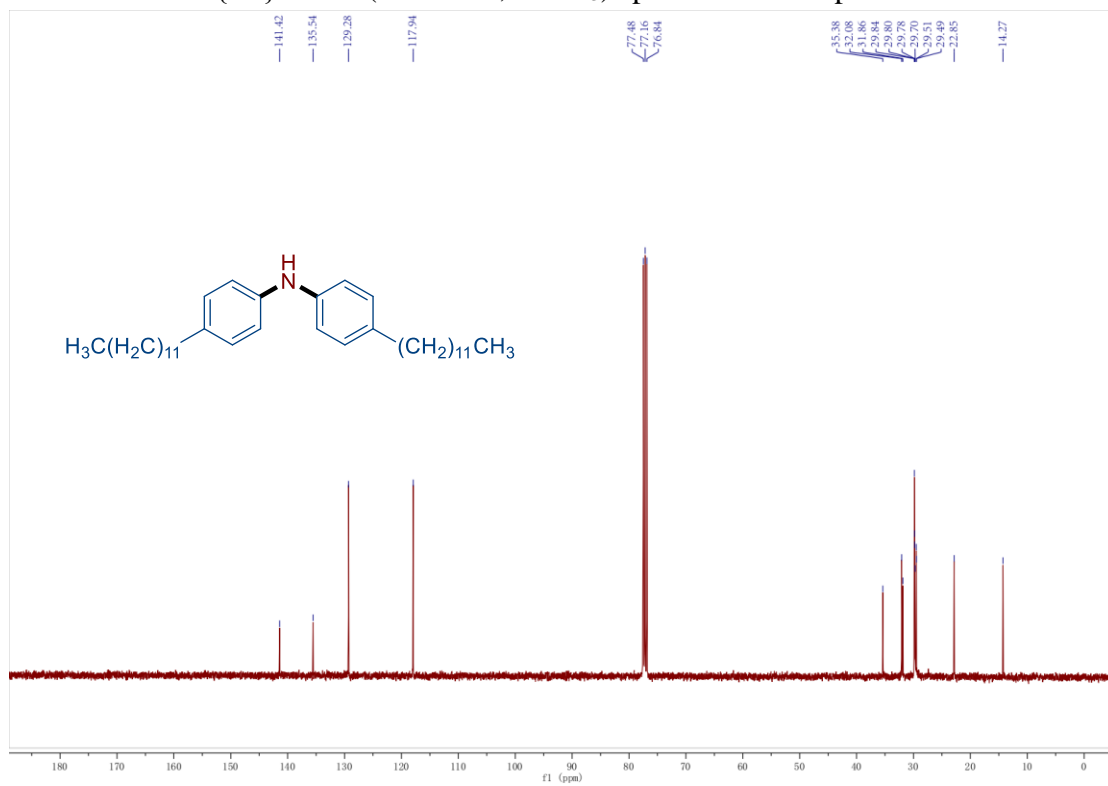

$^1\text{H}$  NMR (400 MHz,  $\text{CDCl}_3$ ) spectrum of compound **50**

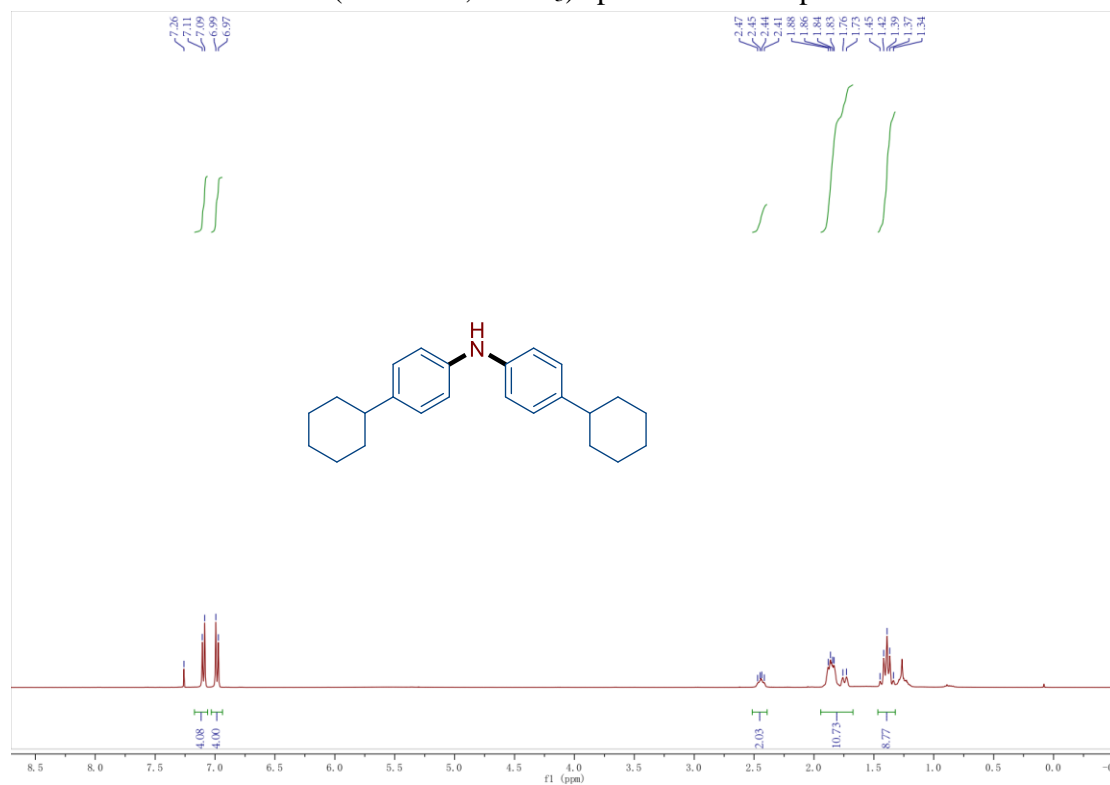

$^{13}\text{C}\{^1\text{H}\}$  NMR (100 MHz,  $\text{CDCl}_3$ ) spectrum of compound **50**

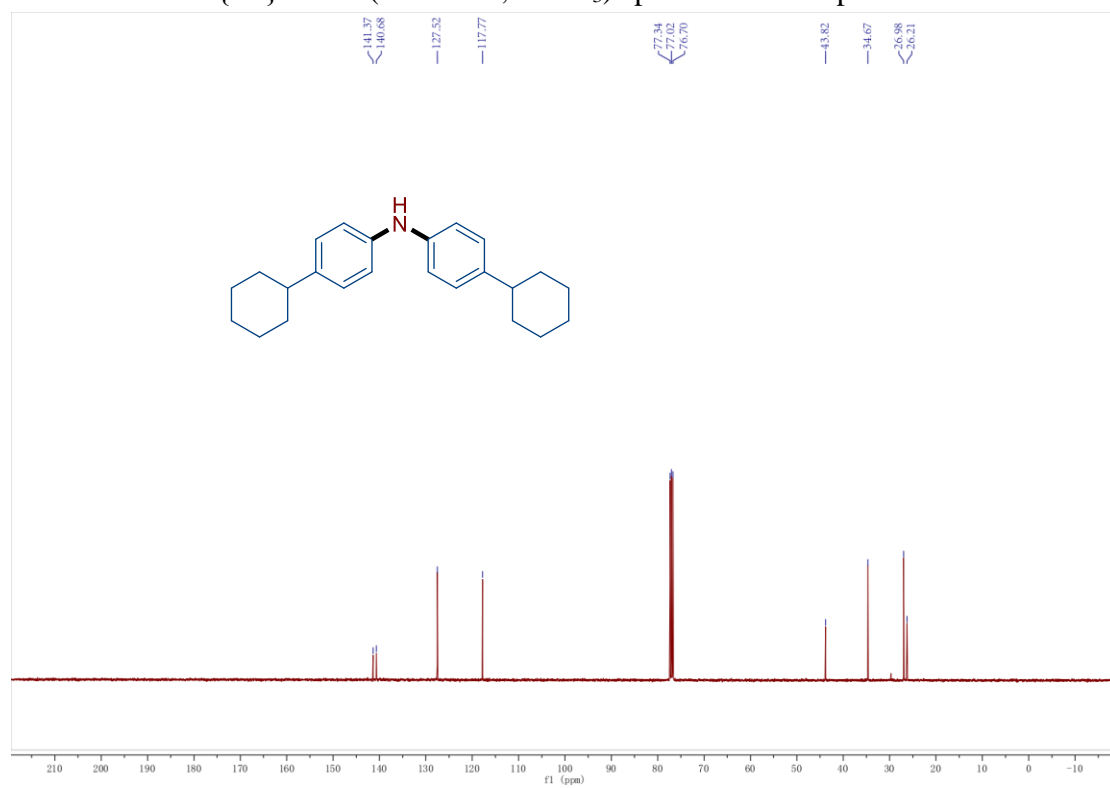



$^1\text{H}$  NMR (400 MHz,  $\text{CDCl}_3$ ) spectrum of compound **51**

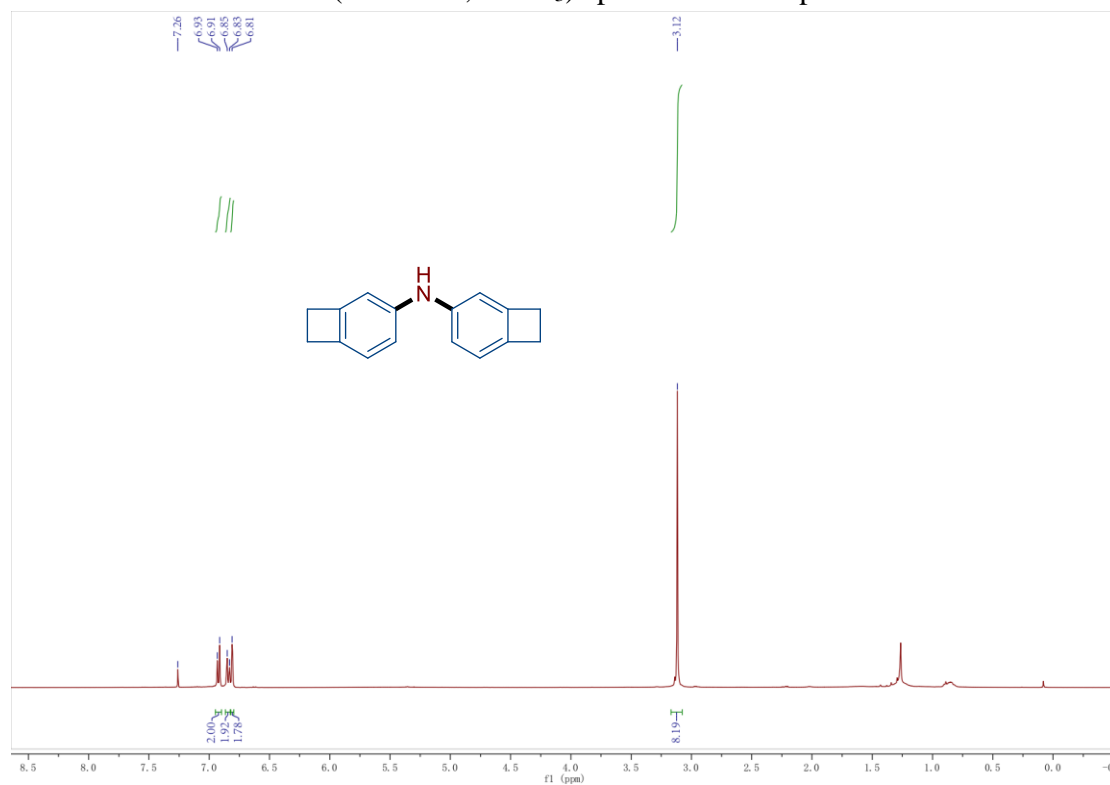

$^{13}\text{C}\{^1\text{H}\}$  NMR (100 MHz,  $\text{CDCl}_3$ ) spectrum of compound **51**

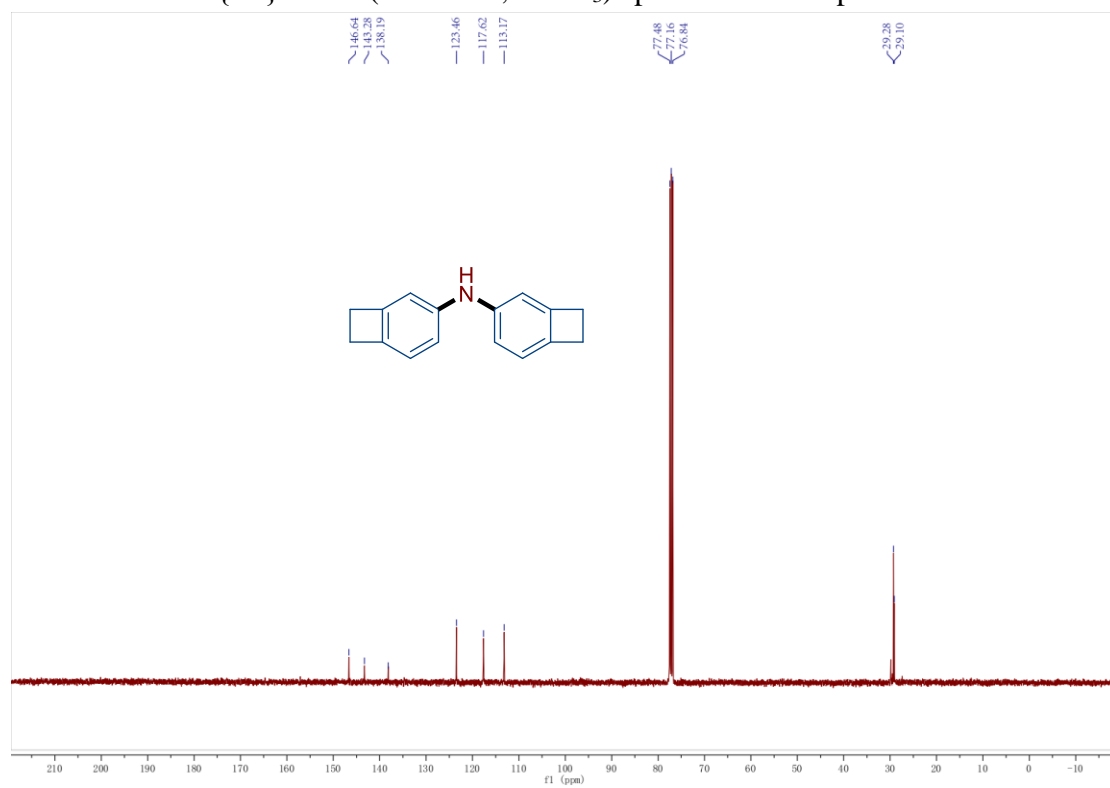

$^1\text{H}$  NMR (400 MHz,  $\text{CDCl}_3$ ) spectrum of compound **52**

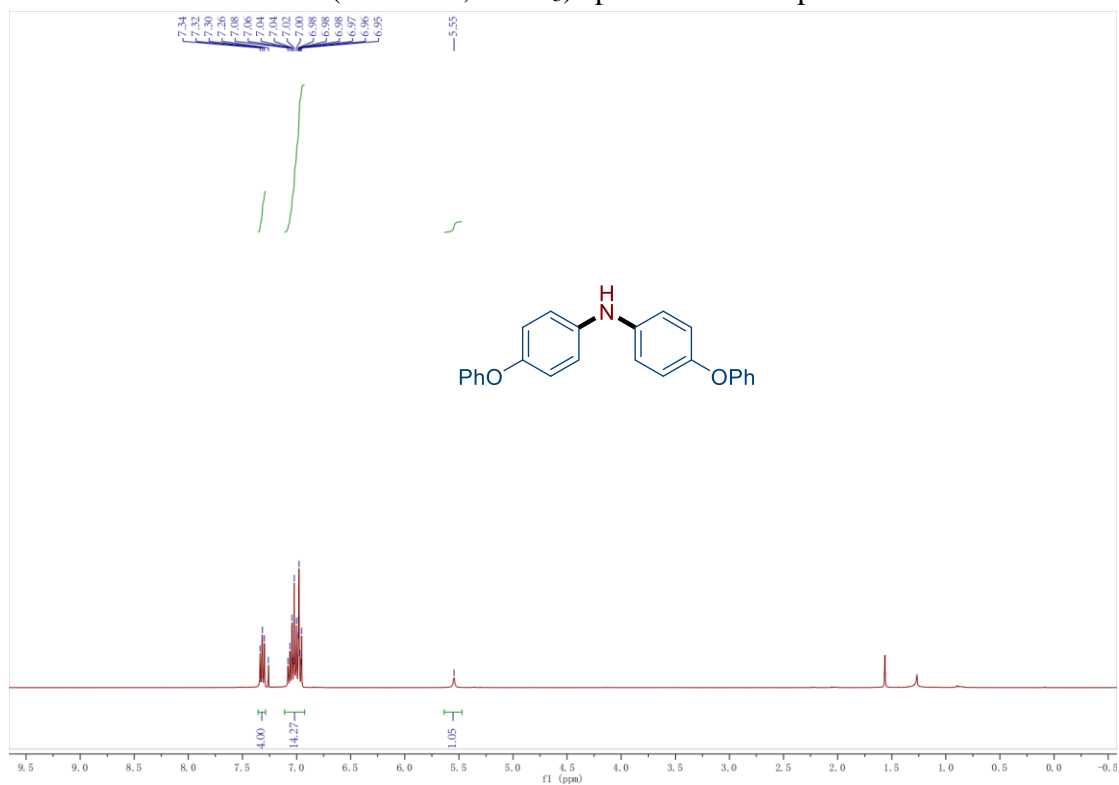

$^{13}\text{C}\{^1\text{H}\}$  NMR (100 MHz,  $\text{CDCl}_3$ ) spectrum of compound **52**

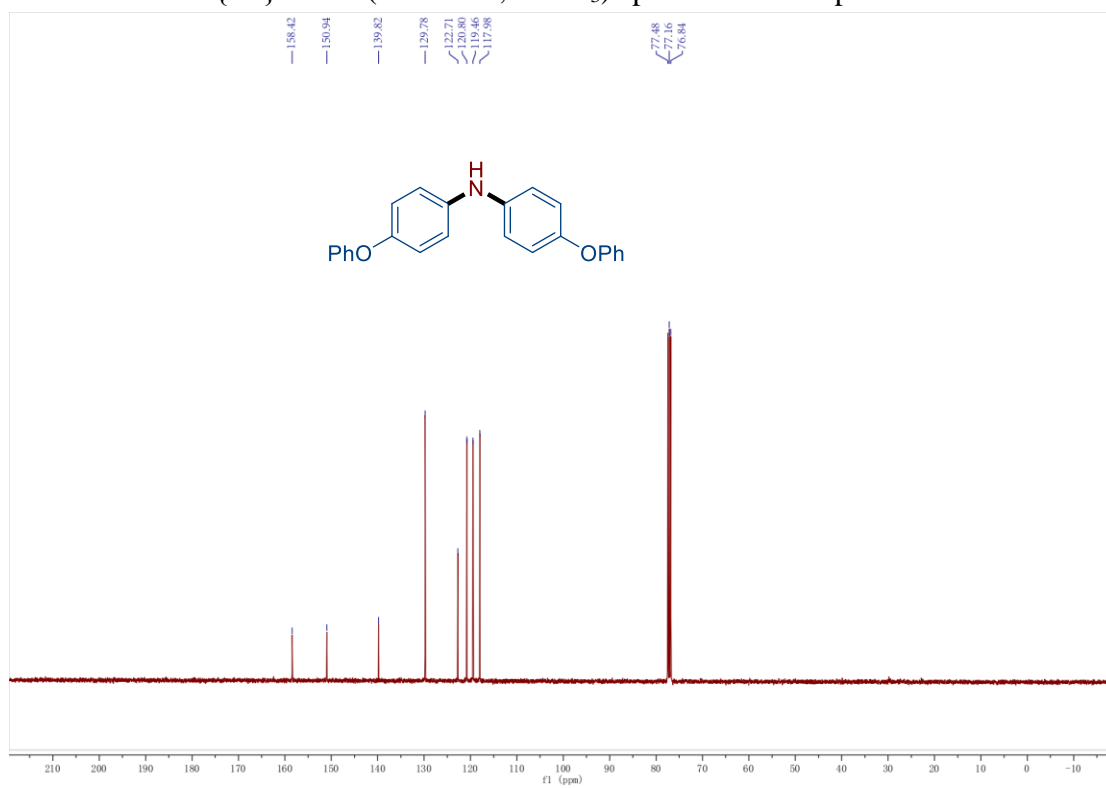

$^1\text{H}$  NMR (400 MHz,  $\text{CDCl}_3$ ) spectrum of compound **53**

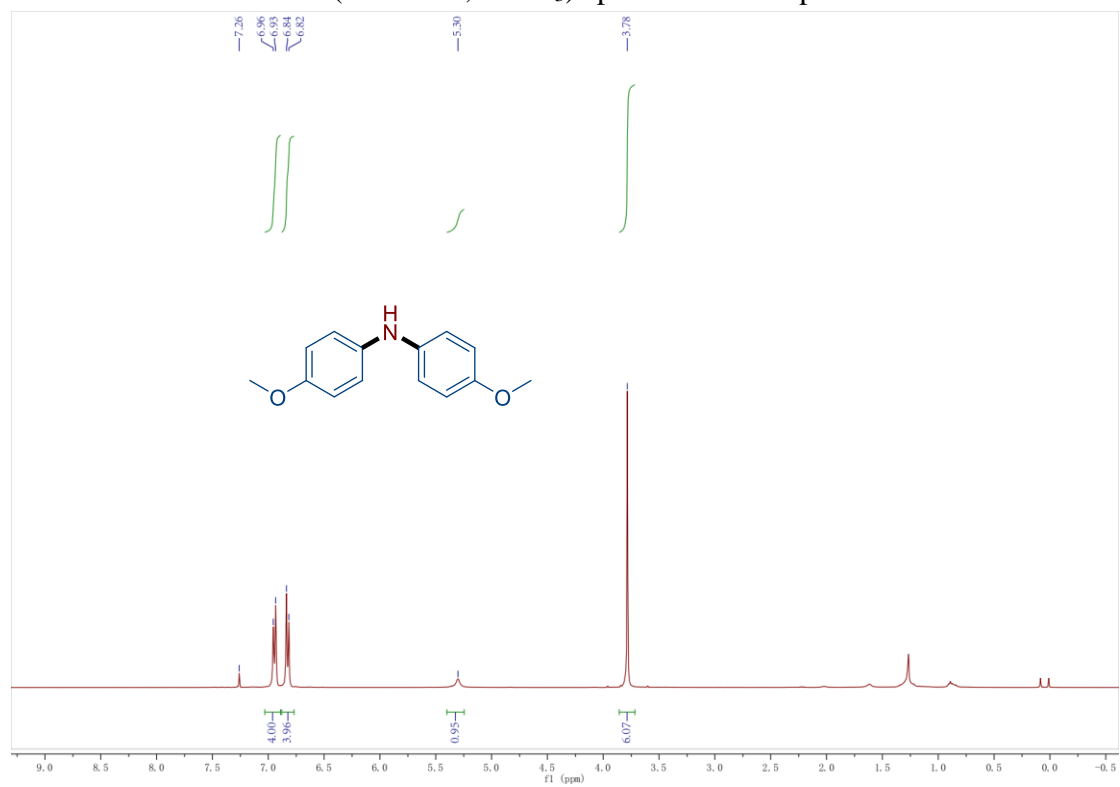

$^{13}\text{C}\{^1\text{H}\}$  NMR (100 MHz,  $\text{CDCl}_3$ ) spectrum of compound **53**

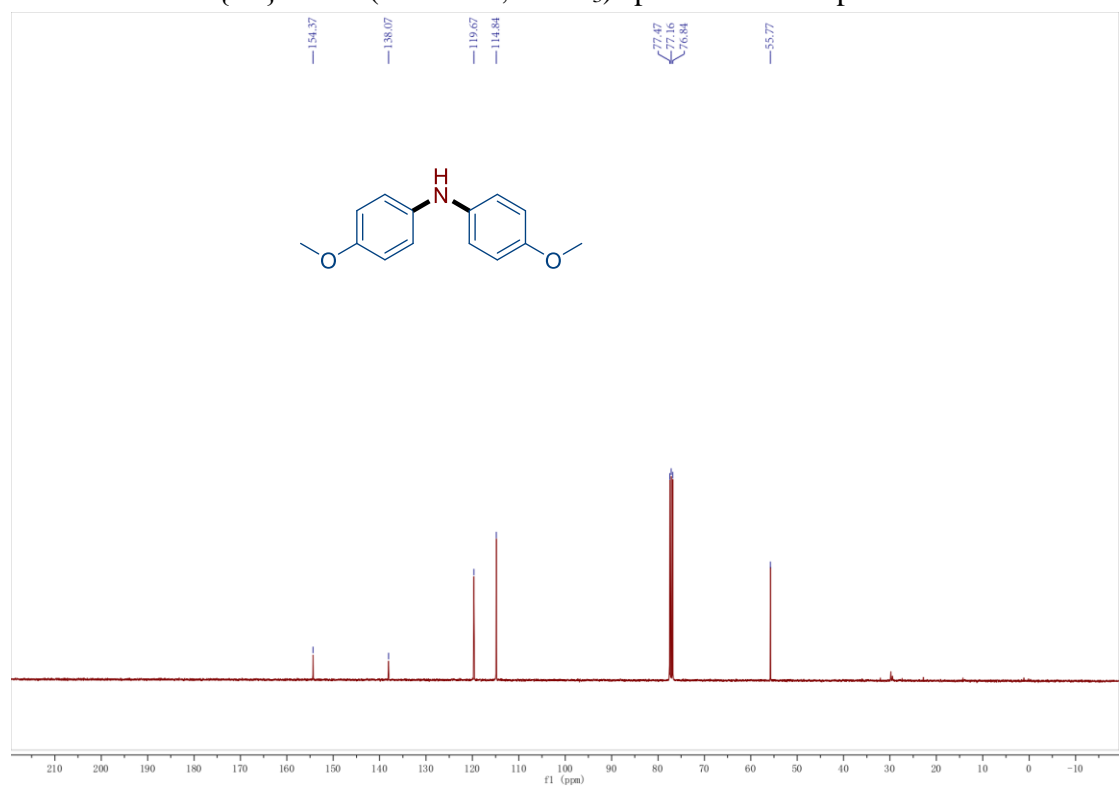

$^1\text{H}$  NMR (400 MHz,  $\text{CDCl}_3$ ) spectrum of compound **54**

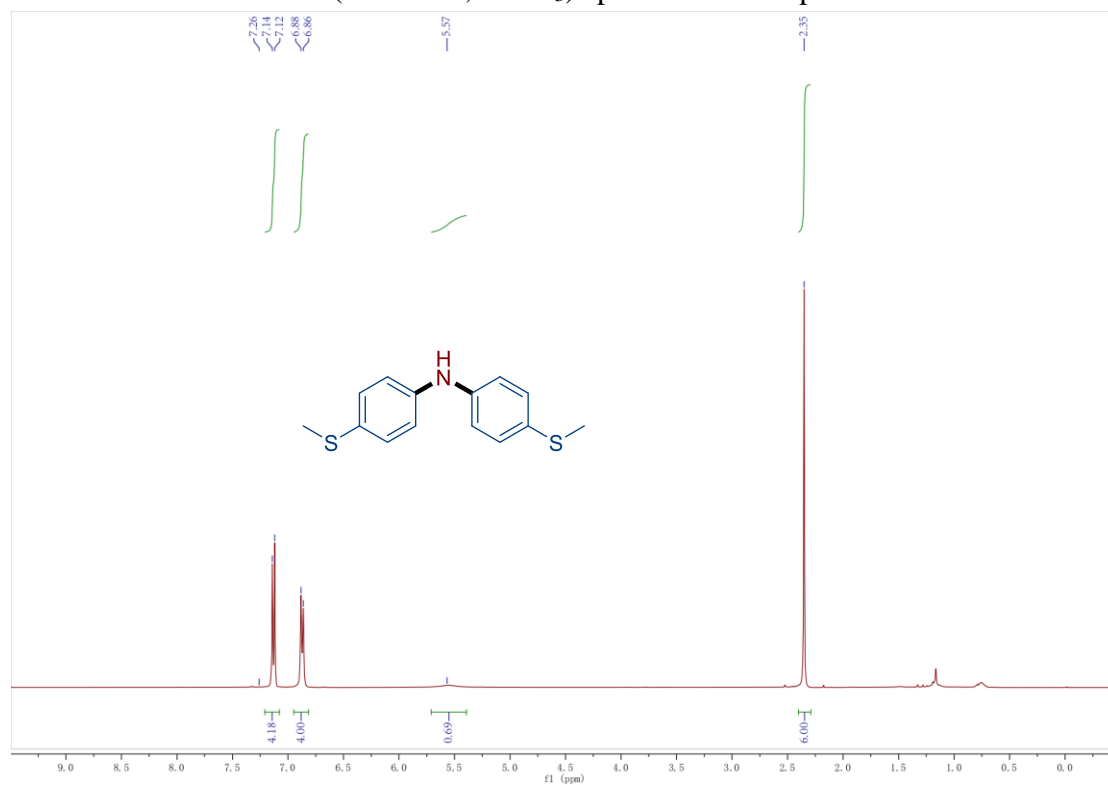

$^{13}\text{C}\{^1\text{H}\}$  NMR (100 MHz,  $\text{CDCl}_3$ ) spectrum of compound **54**

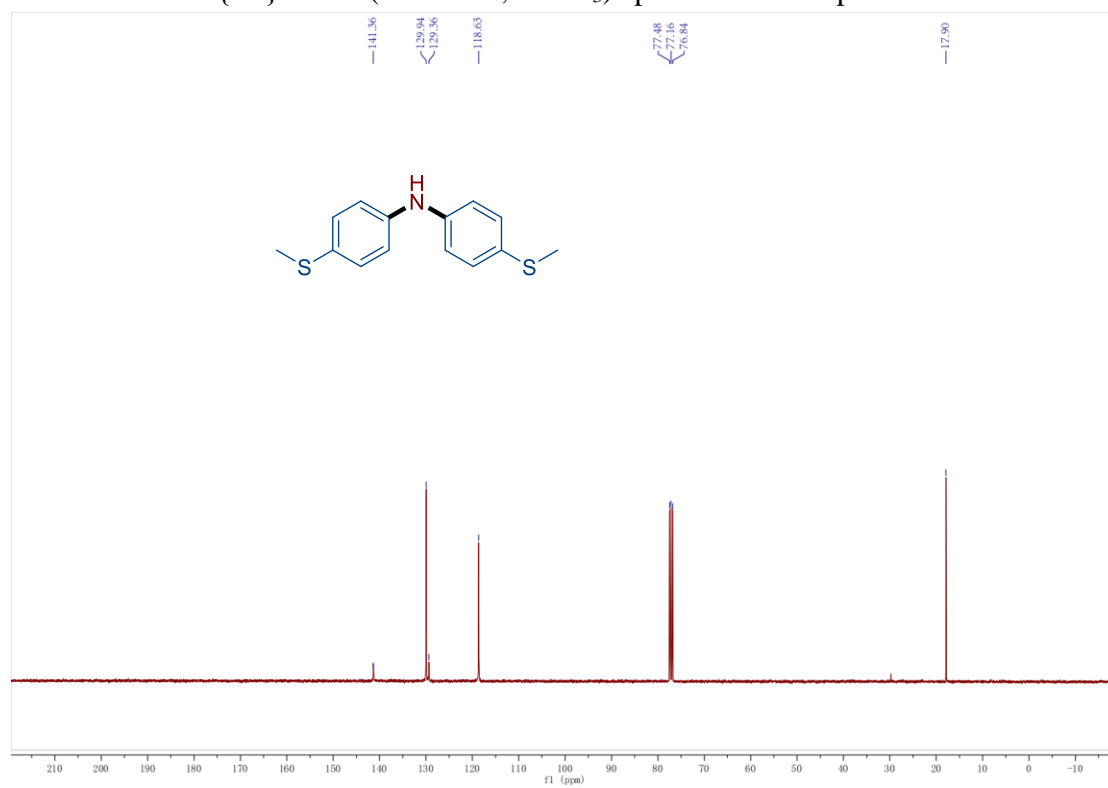

$^1\text{H}$  NMR (400 MHz,  $\text{CDCl}_3$ ) spectrum of compound **55**

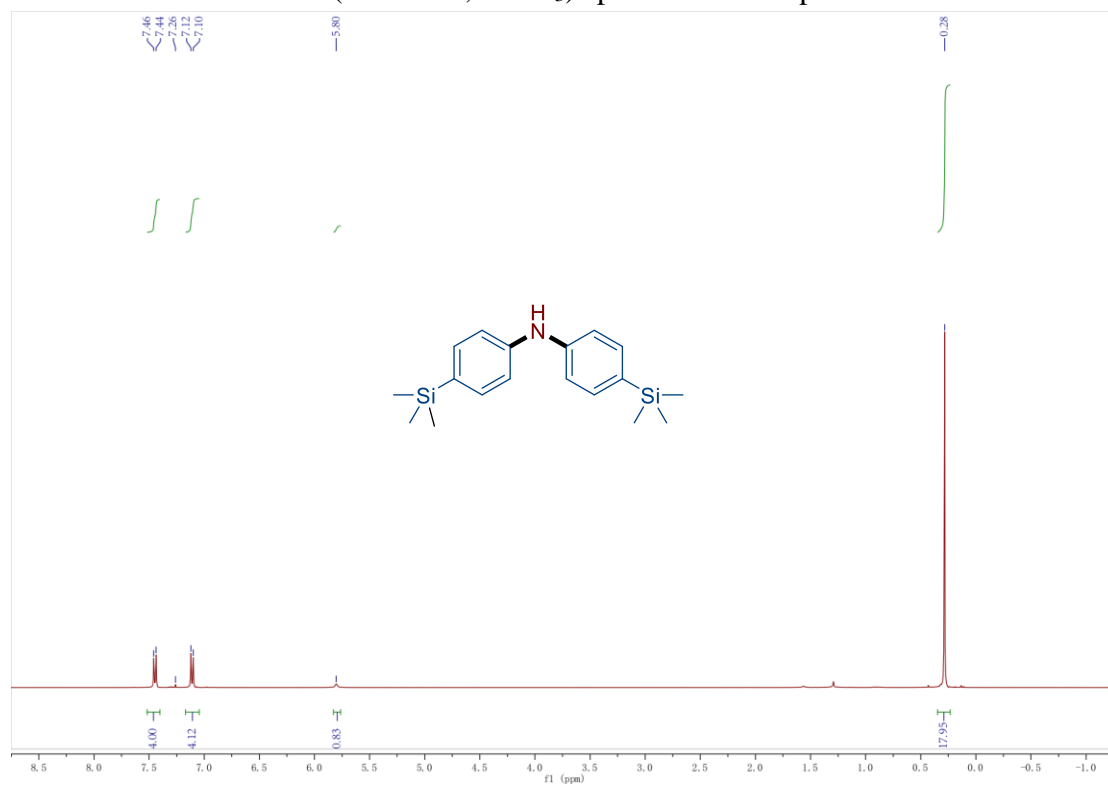

$^{13}\text{C}\{^1\text{H}\}$  NMR (100 MHz,  $\text{CDCl}_3$ ) spectrum of compound **55**

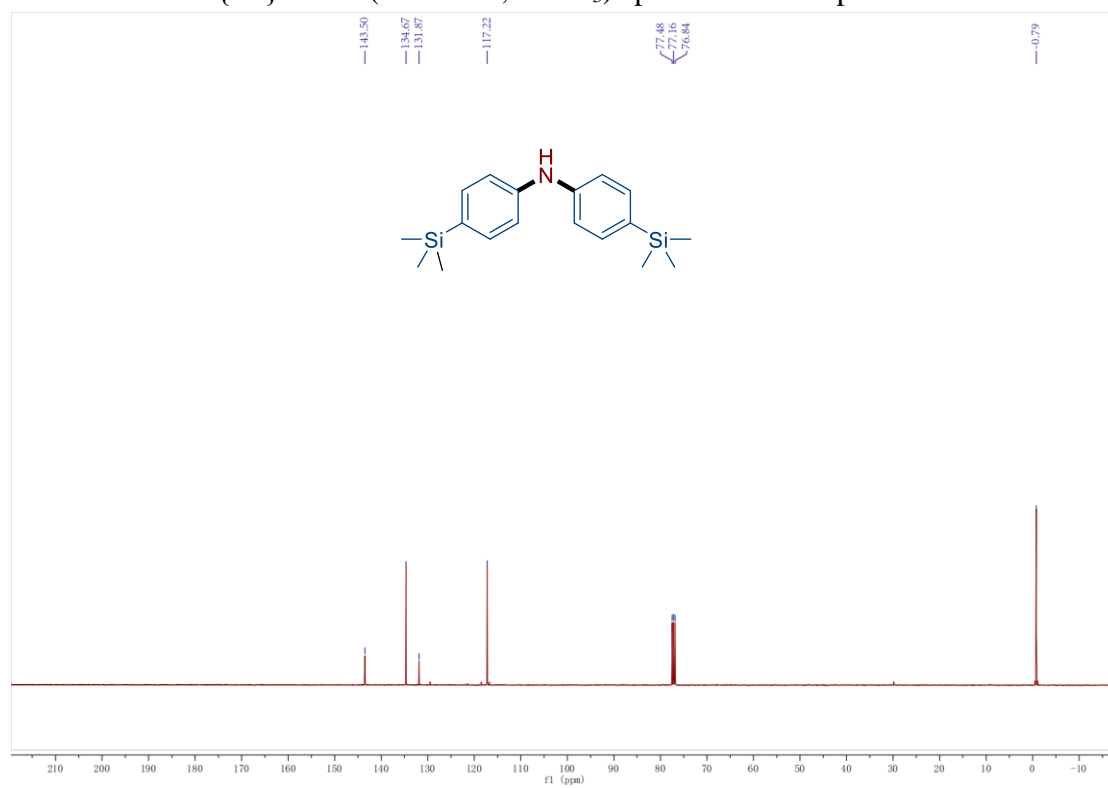

$^1\text{H}$  NMR (400 MHz,  $\text{CDCl}_3$ ) spectrum of compound **56**

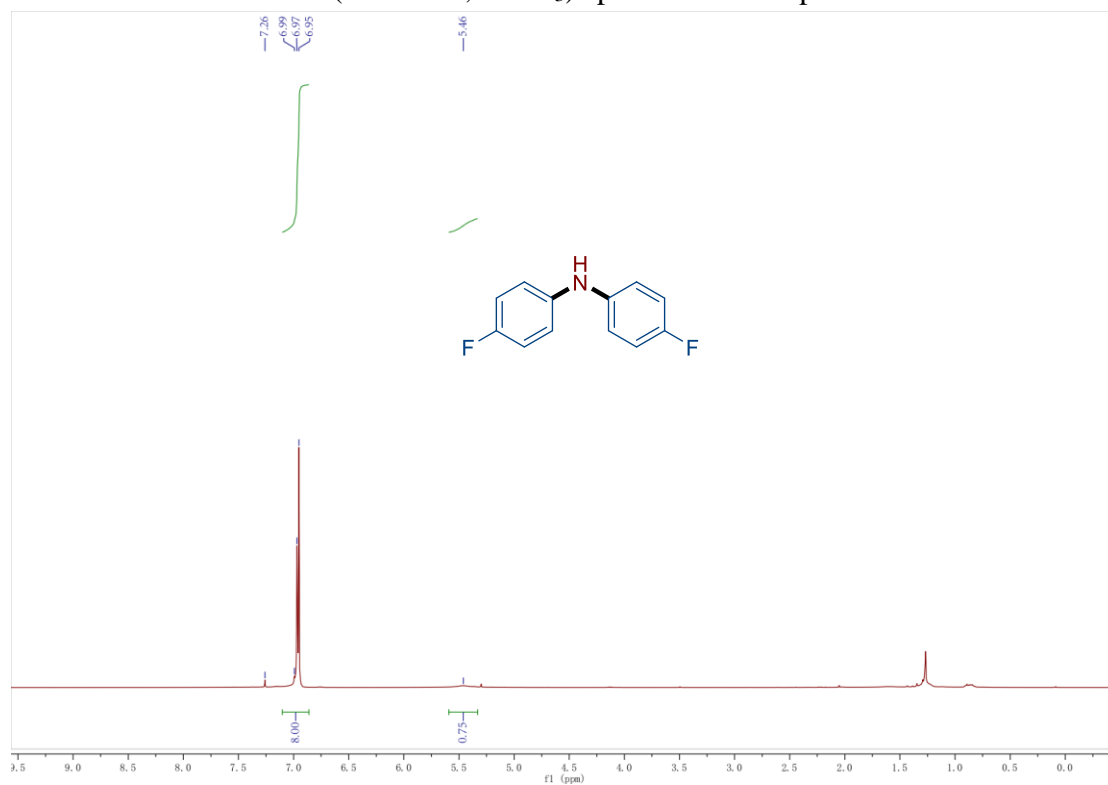

$^{13}\text{C}\{^1\text{H}\}$  NMR (100 MHz,  $\text{CDCl}_3$ ) spectrum of compound **56**

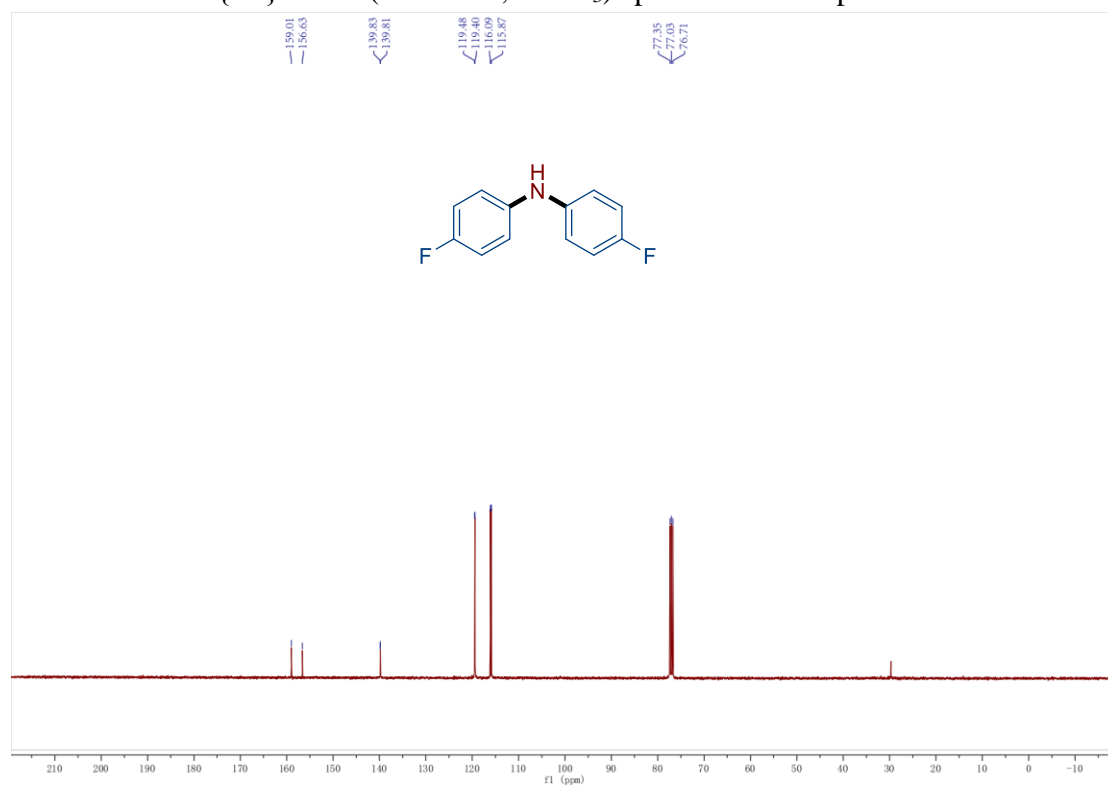

$^{19}\text{F}$  NMR (376 MHz,  $\text{CDCl}_3$ ) spectrum of compound **56**

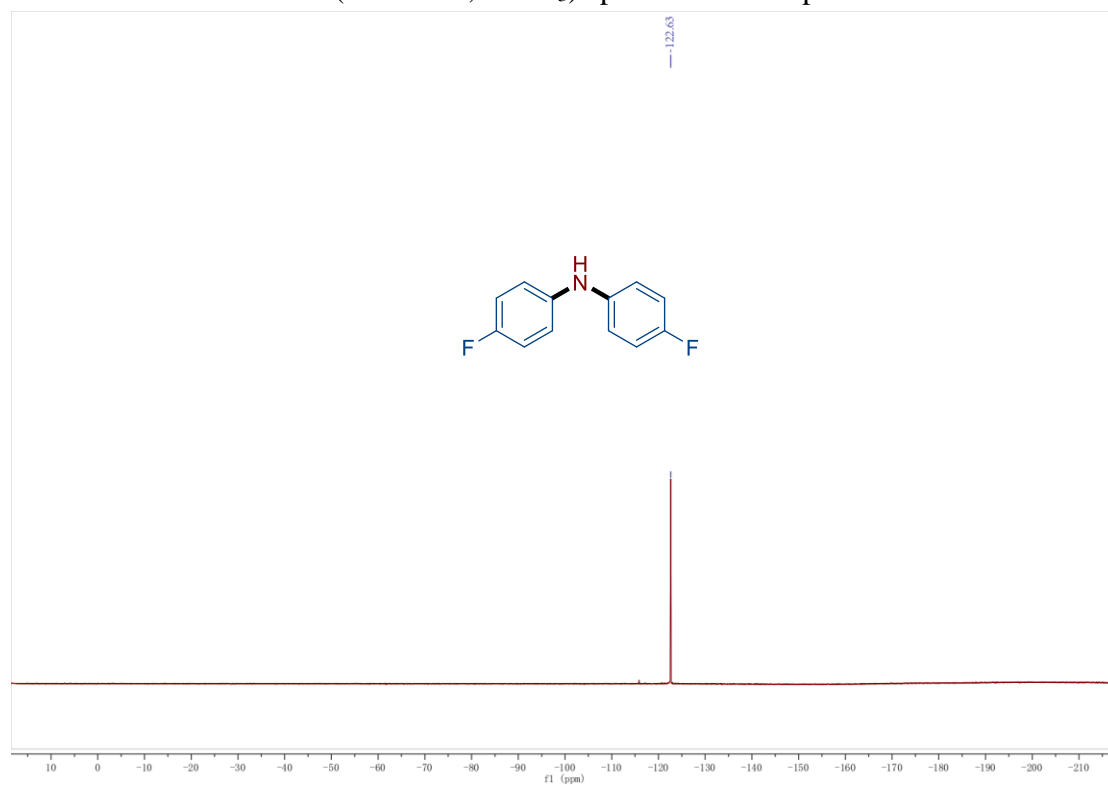

$^1\text{H}$  NMR (400 MHz,  $\text{CDCl}_3$ ) spectrum of compound **57**

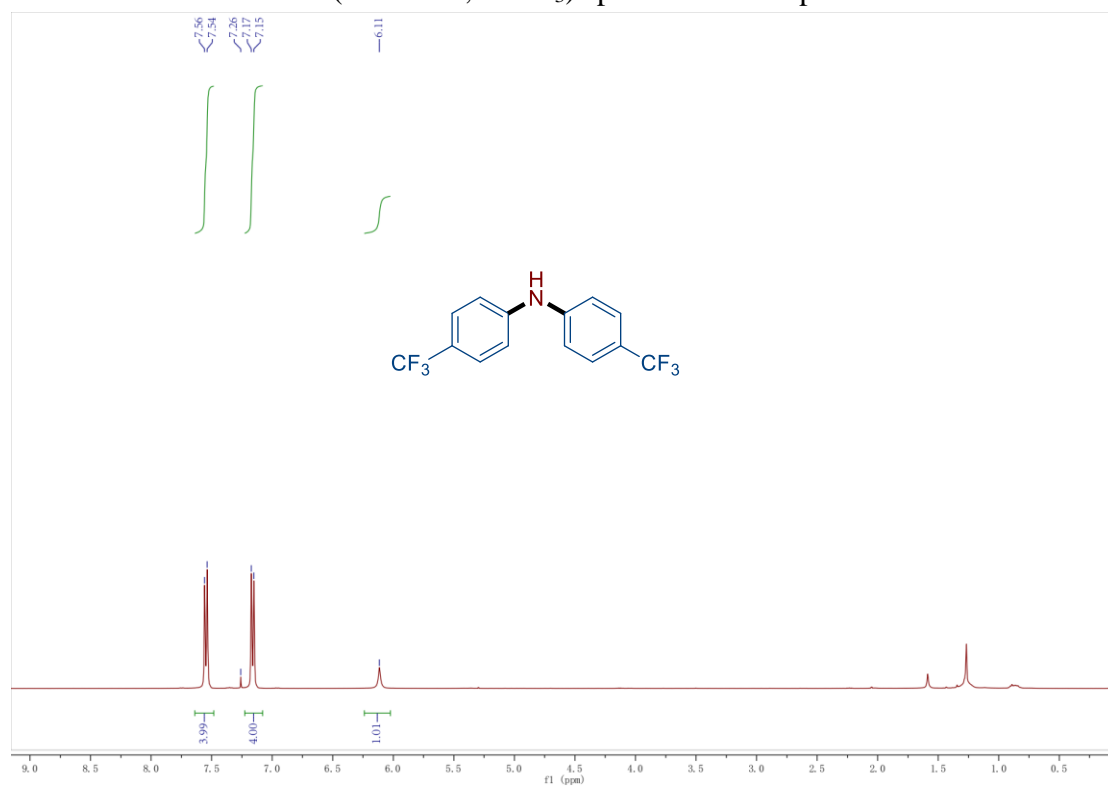

$^{13}\text{C}\{^1\text{H}\}$  NMR (100 MHz,  $\text{CDCl}_3$ ) spectrum of compound **57**

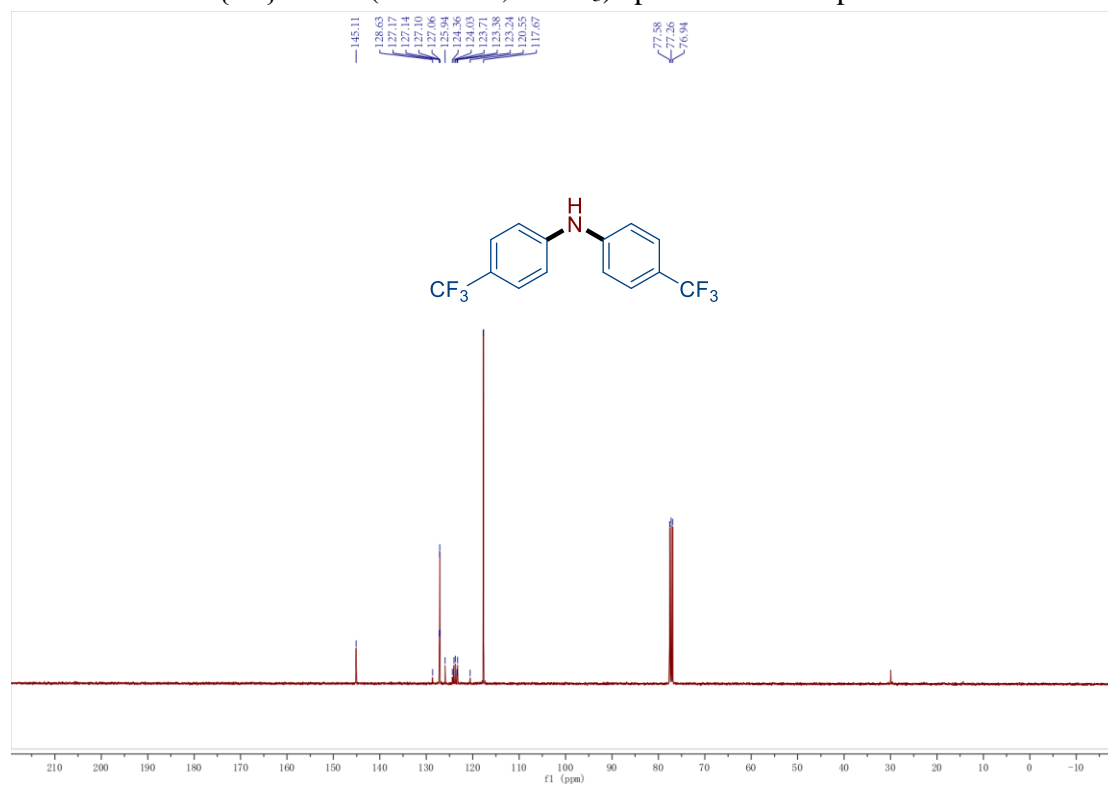

$^{19}\text{F}$  NMR (376 MHz,  $\text{CDCl}_3$ ) spectrum of compound **57**

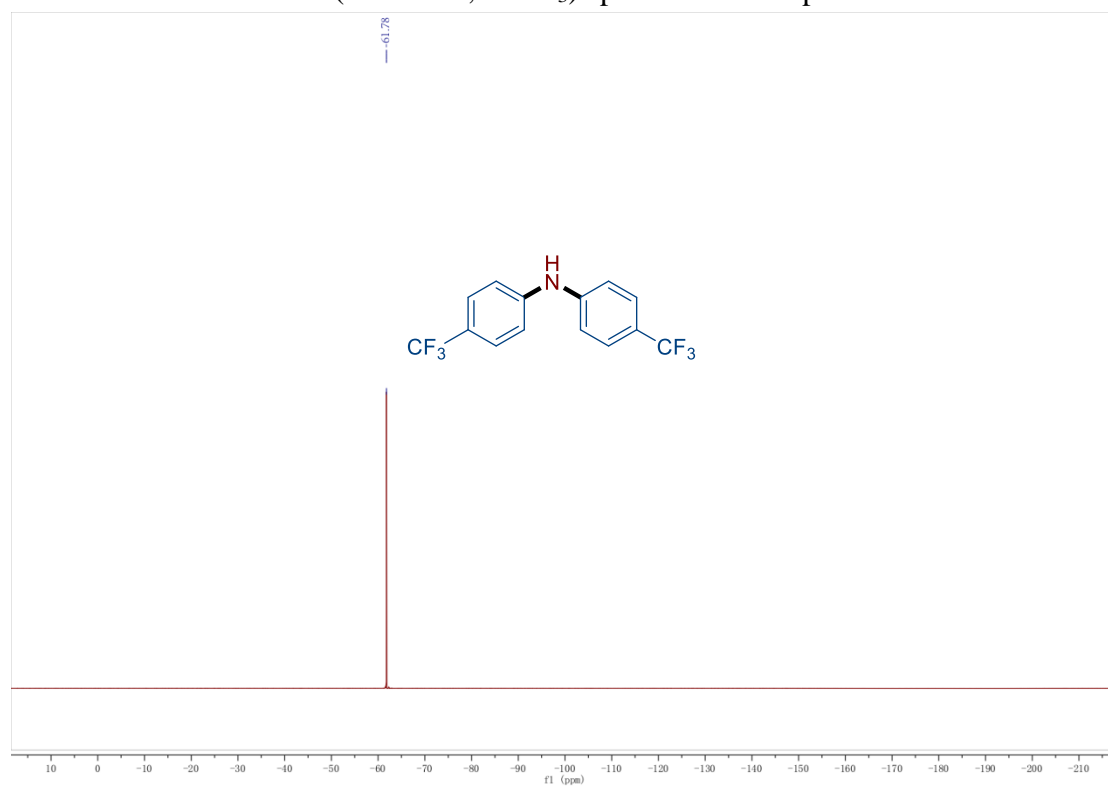



$^1\text{H}$  NMR (400 MHz,  $\text{CDCl}_3$ ) spectrum of compound **58**

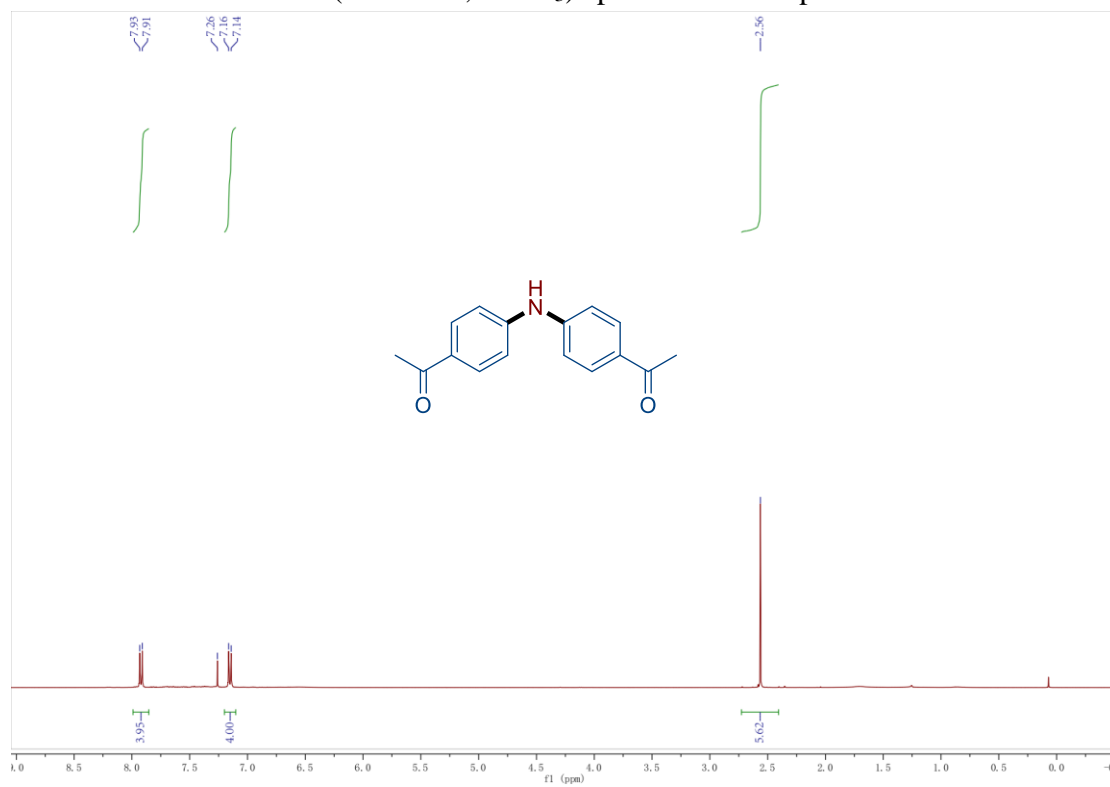

$^{13}\text{C}\{^1\text{H}\}$  NMR (100 MHz,  $\text{CDCl}_3$ ) spectrum of compound **58**

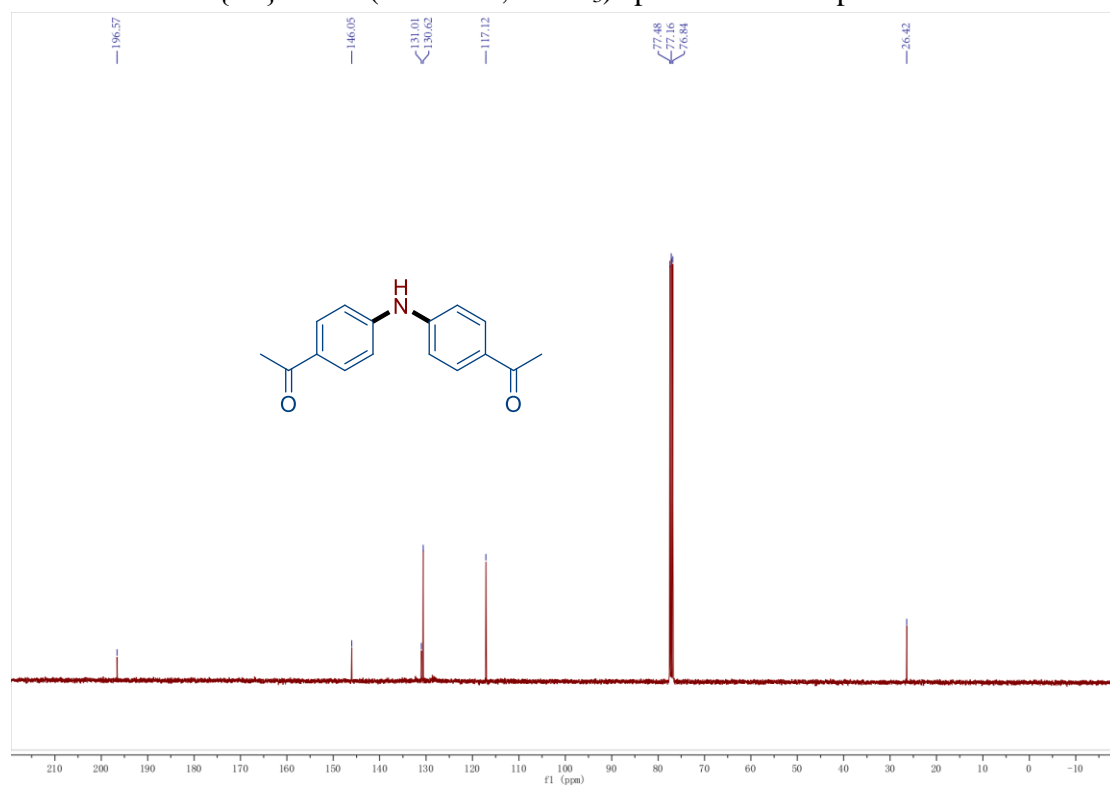

$^1\text{H}$  NMR (400 MHz,  $\text{CDCl}_3$ ) spectrum of compound **44**

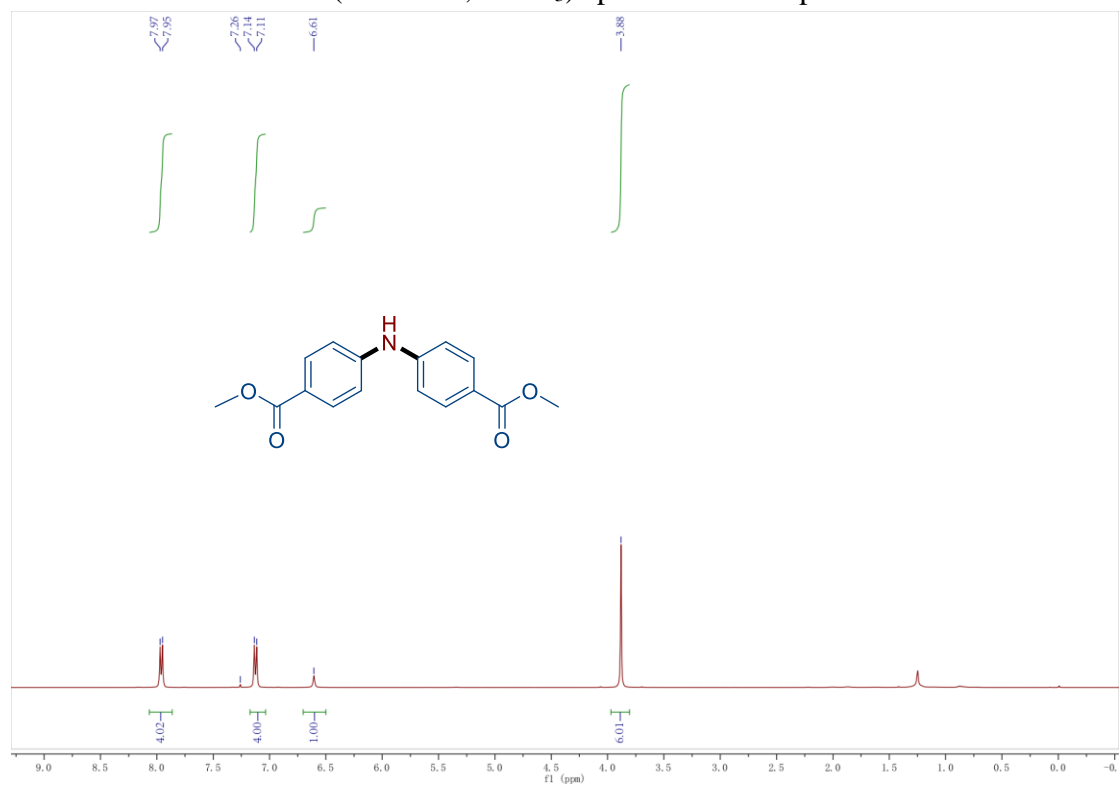

$^{13}\text{C}\{^1\text{H}\}$  NMR (100 MHz,  $\text{CDCl}_3$ ) spectrum of compound **44**

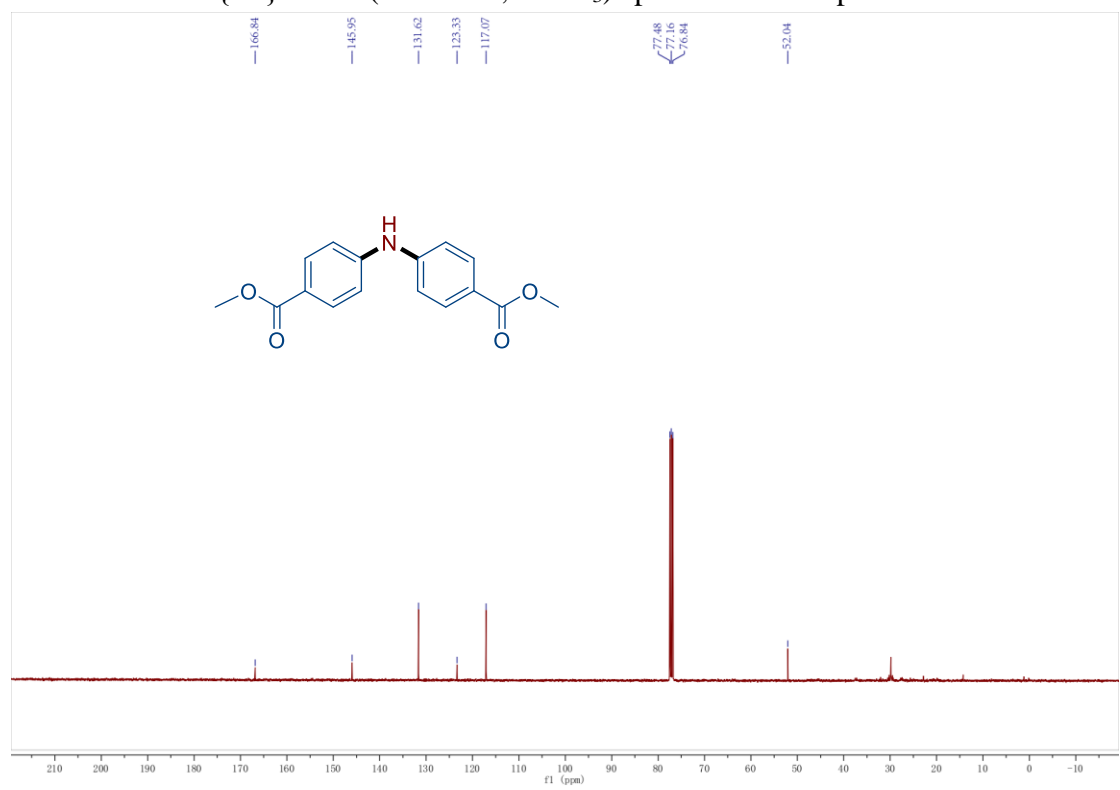

$^1\text{H}$  NMR (400 MHz,  $\text{DMSO-}d_6$ ) spectrum of compound **59**

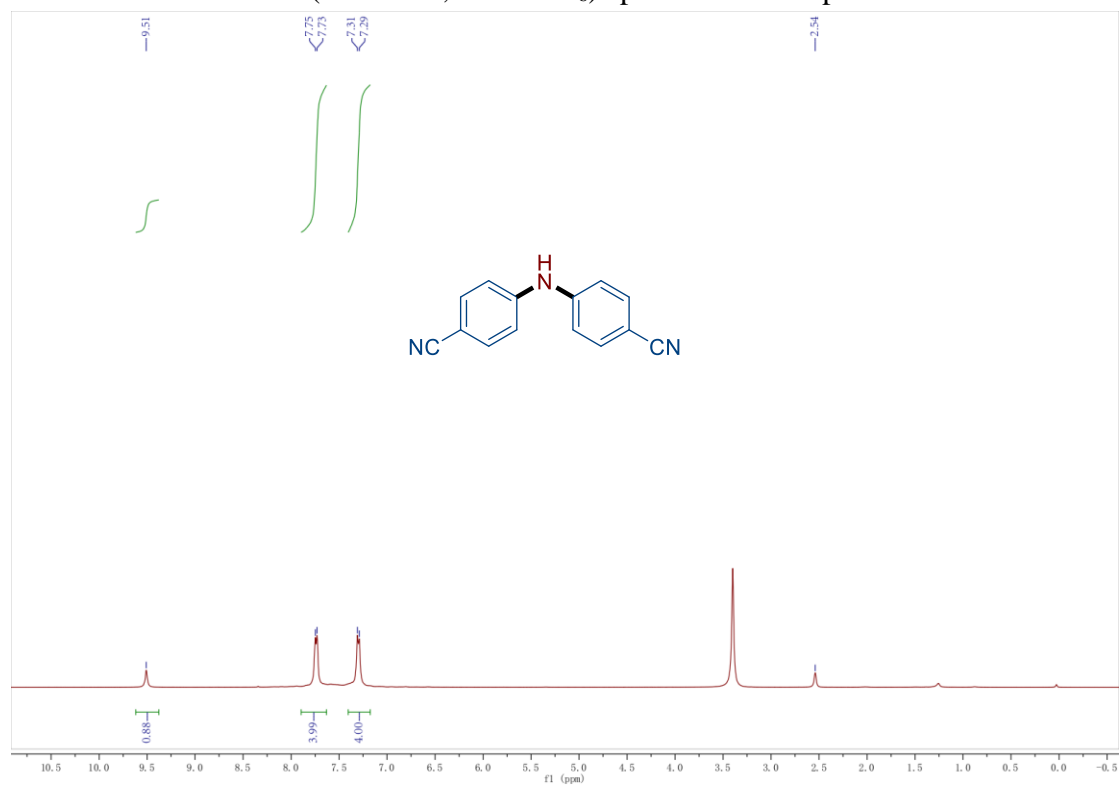

$^{13}\text{C}\{^1\text{H}\}$  NMR (100 MHz,  $\text{DMSO-}d_6$ ) spectrum of compound **59**

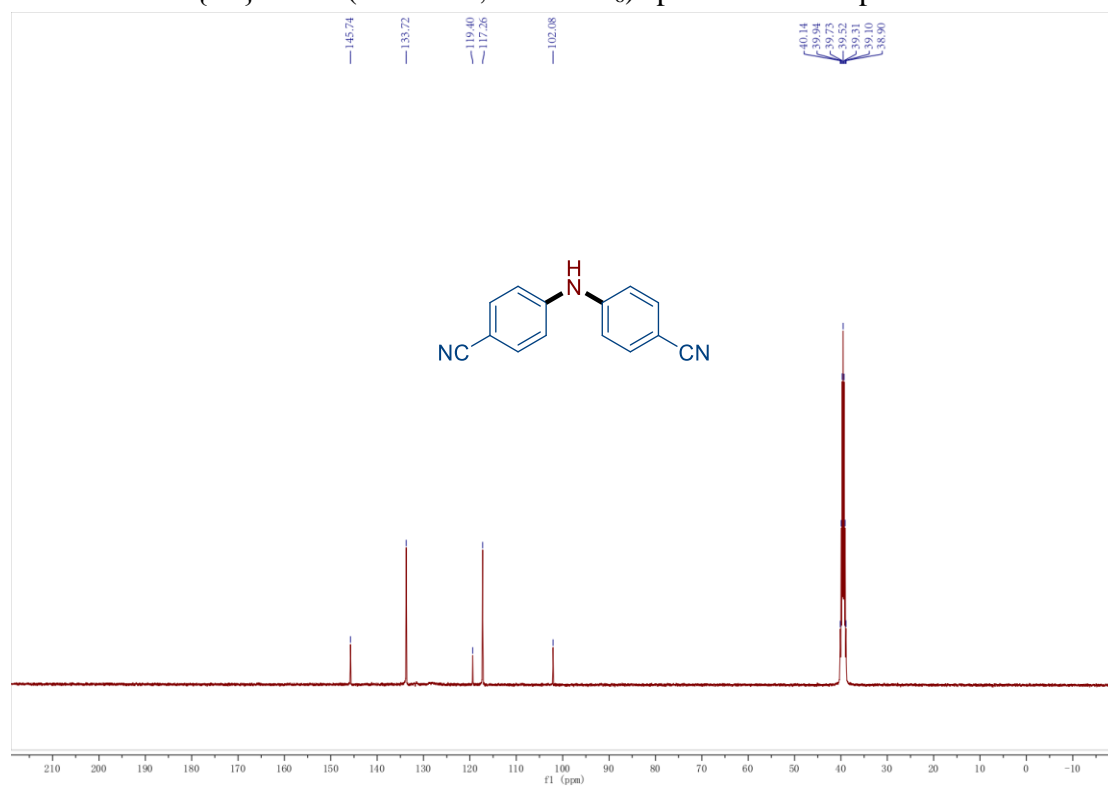

$^1\text{H}$  NMR (400 MHz,  $\text{CDCl}_3$ ) spectrum of compound **60**

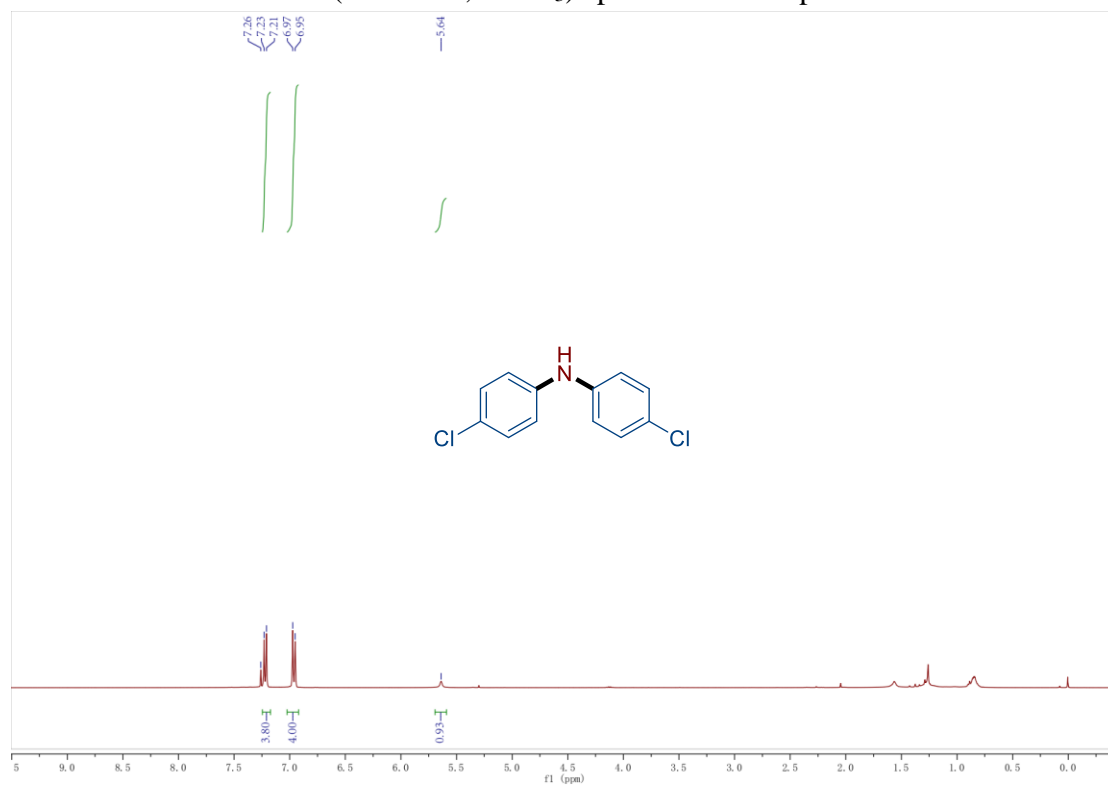

$^{13}\text{C}\{^1\text{H}\}$  NMR (100 MHz,  $\text{CDCl}_3$ ) spectrum of compound **60**

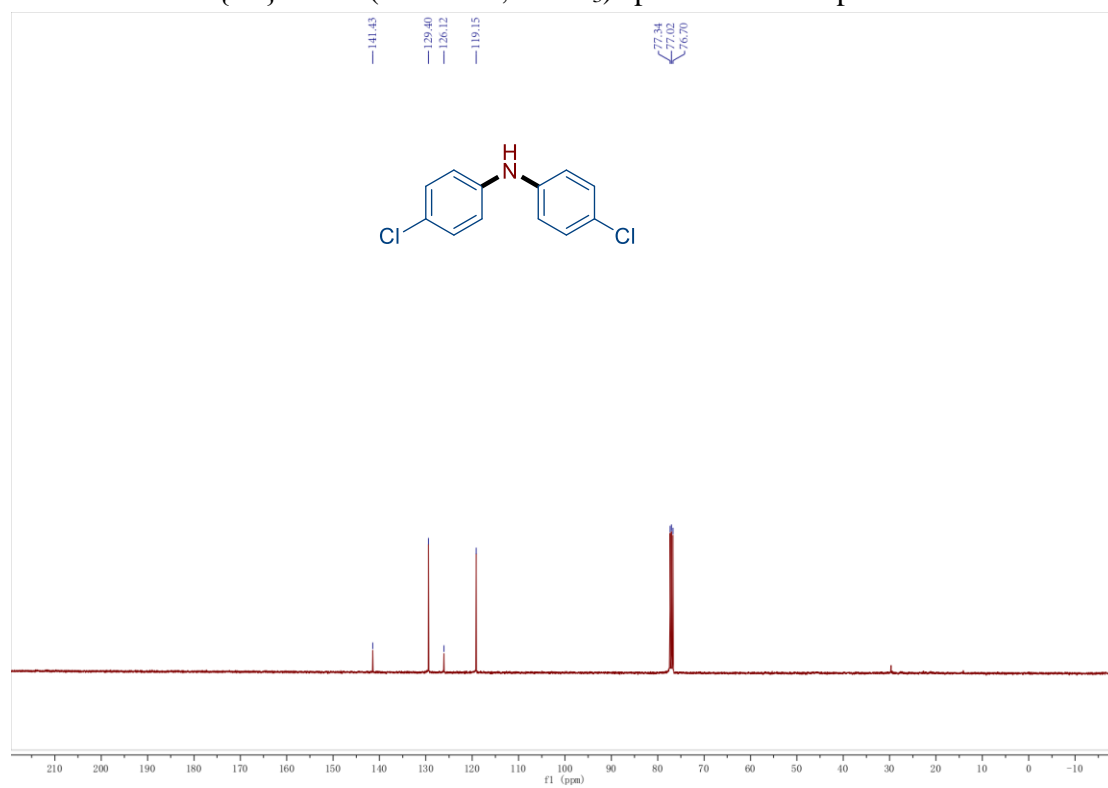

$^1\text{H}$  NMR (400 MHz,  $\text{CDCl}_3$ ) spectrum of compound **61**

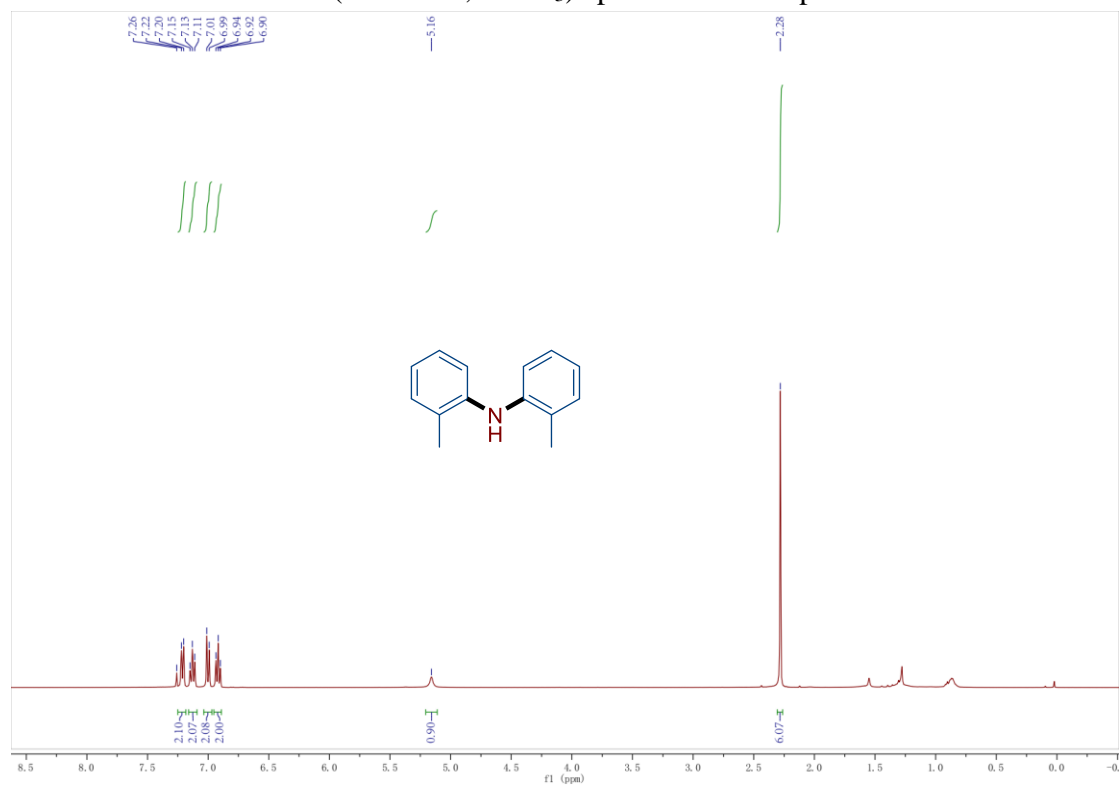

$^{13}\text{C}\{^1\text{H}\}$  NMR (100 MHz,  $\text{CDCl}_3$ ) spectrum of compound **61**

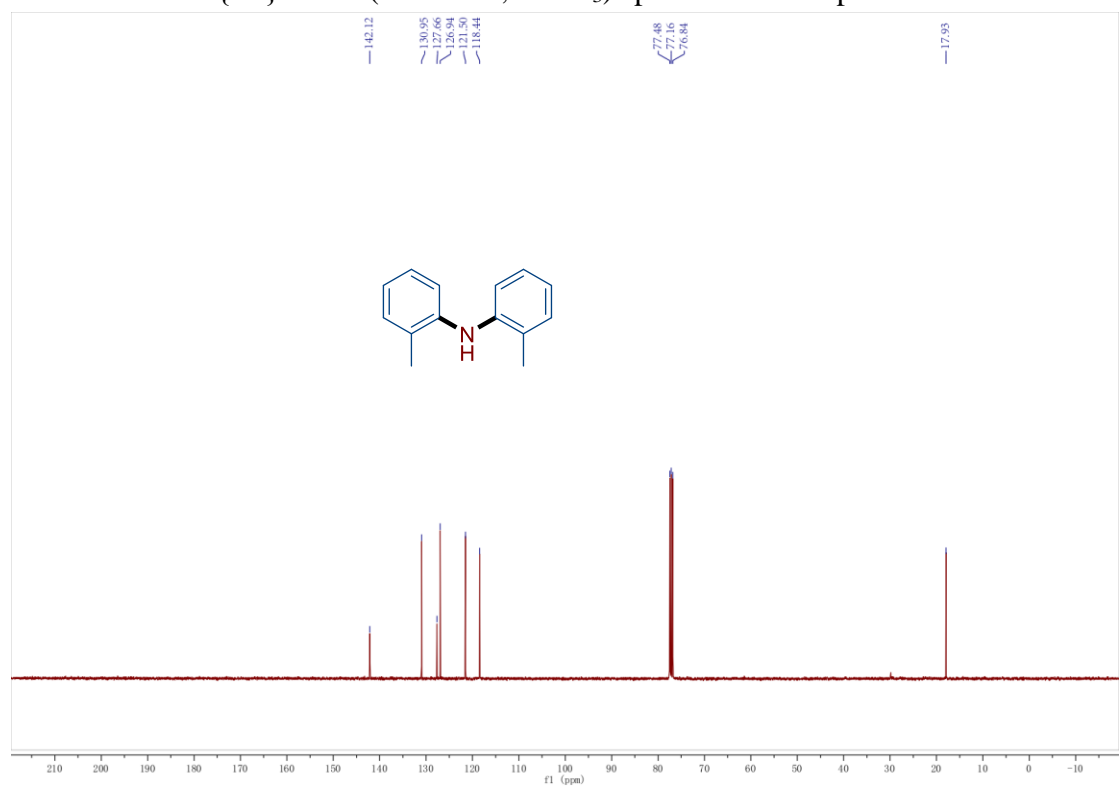

$^1\text{H}$  NMR (400 MHz,  $\text{CDCl}_3$ ) spectrum of compound **62**

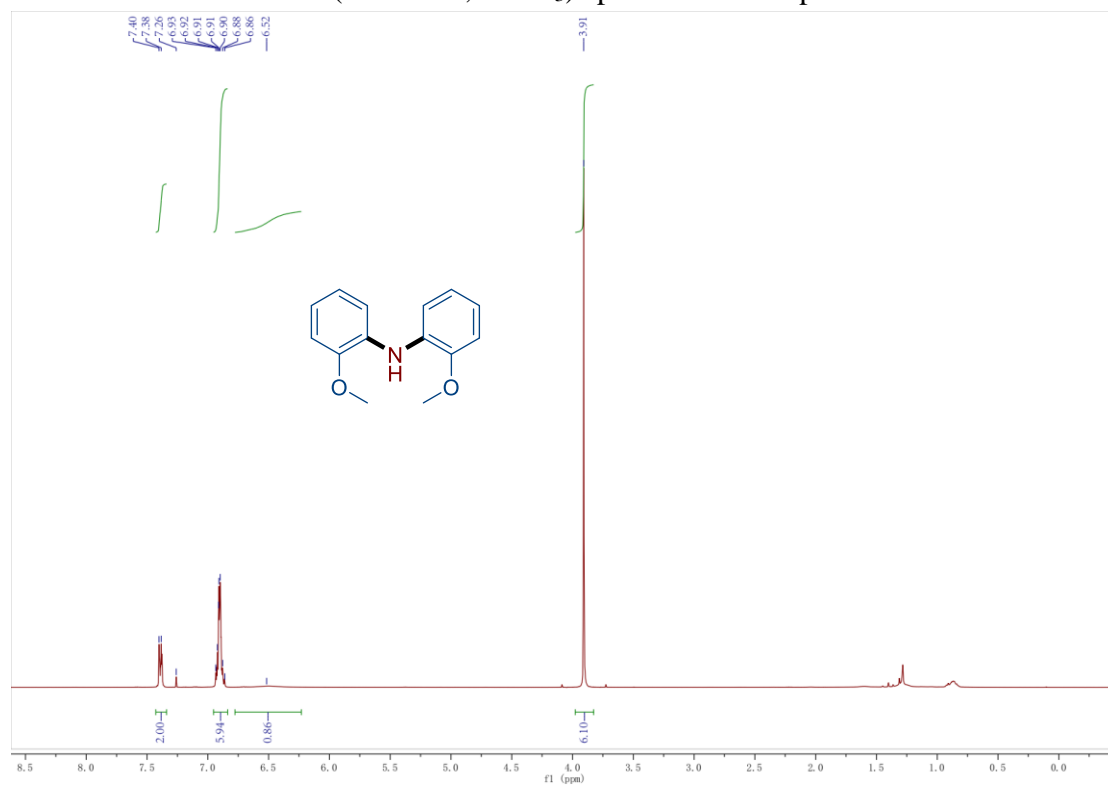

$^{13}\text{C}\{^1\text{H}\}$  NMR (100 MHz,  $\text{CDCl}_3$ ) spectrum of compound **62**

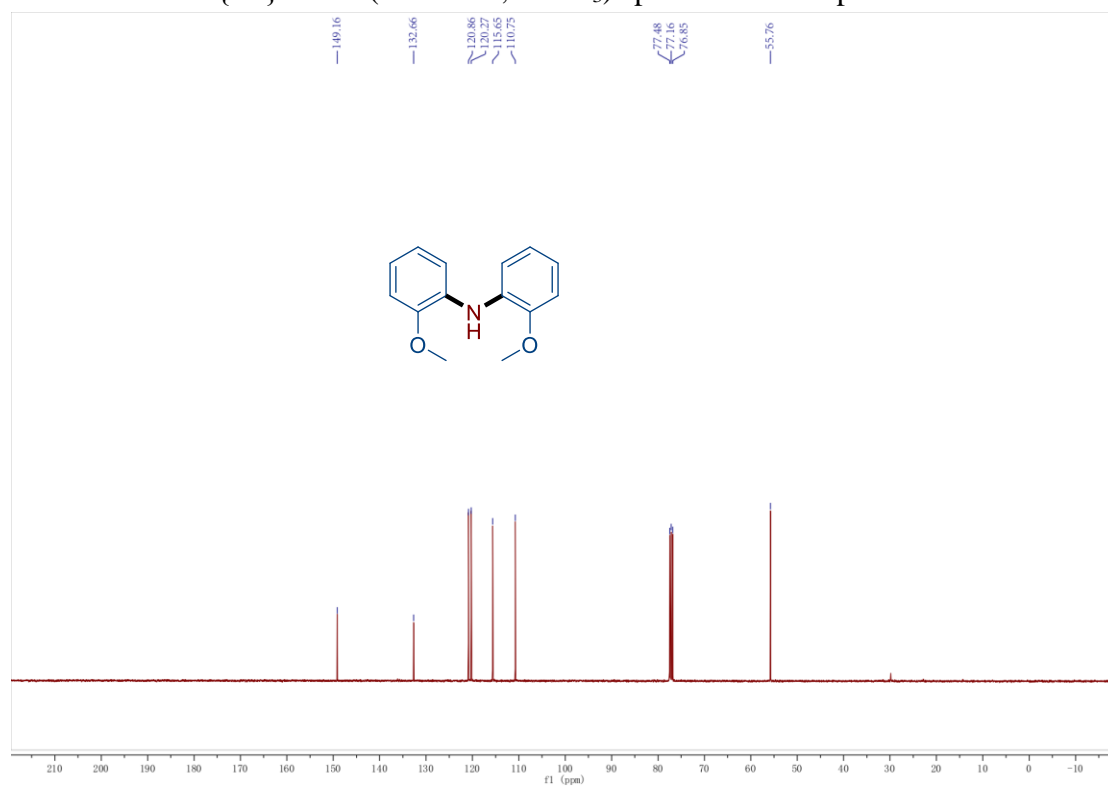

$^1\text{H}$  NMR (400 MHz,  $\text{CDCl}_3$ ) spectrum of compound **63**

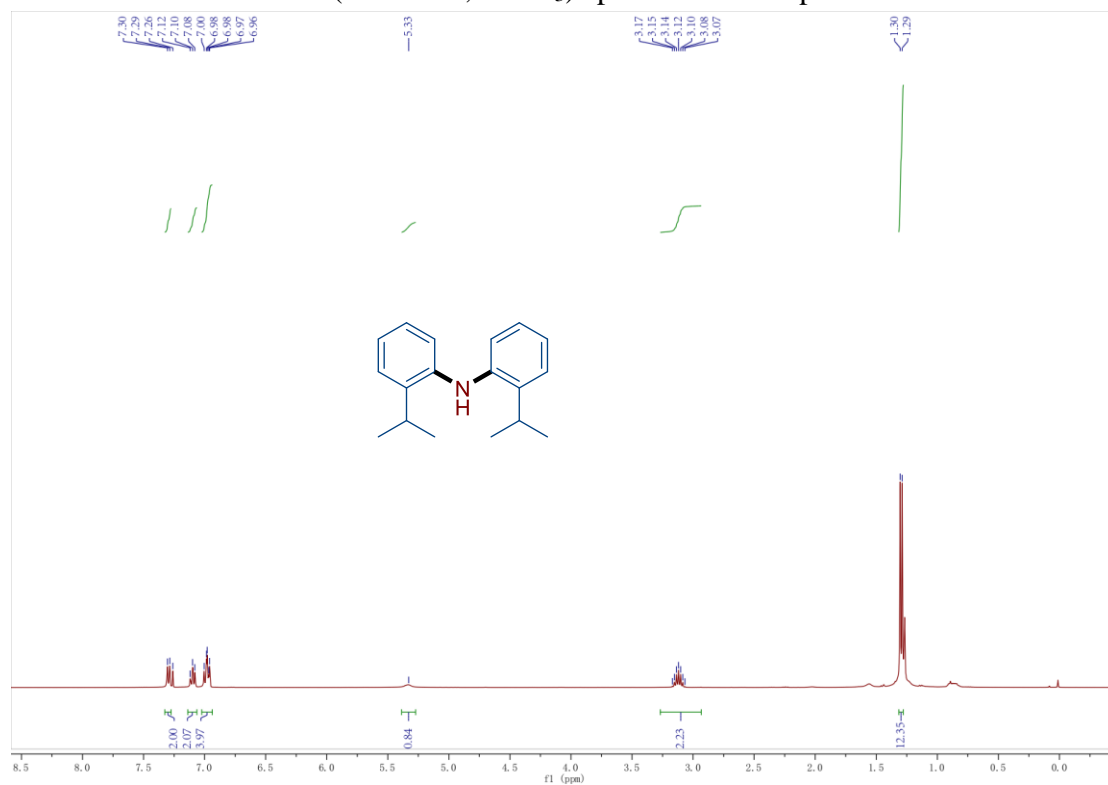

$^{13}\text{C}\{^1\text{H}\}$  NMR (100 MHz,  $\text{CDCl}_3$ ) spectrum of compound **63**

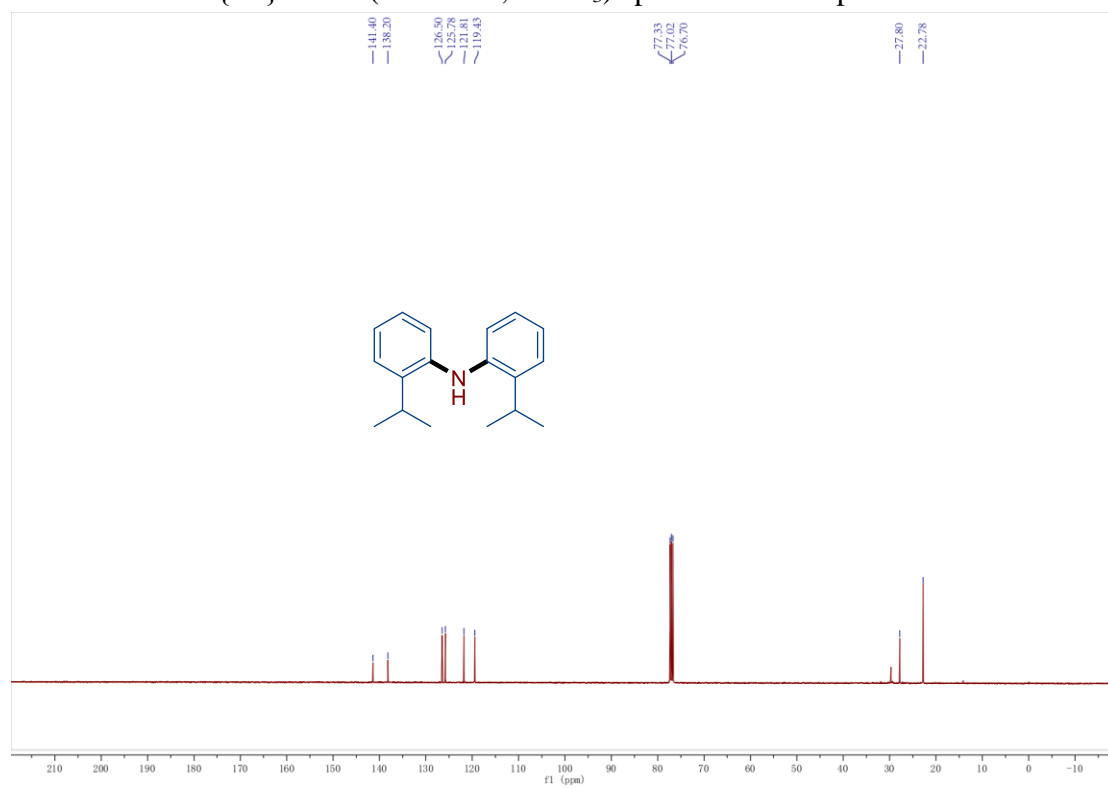

$^1\text{H}$  NMR (400 MHz,  $\text{CDCl}_3$ ) spectrum of compound **64**

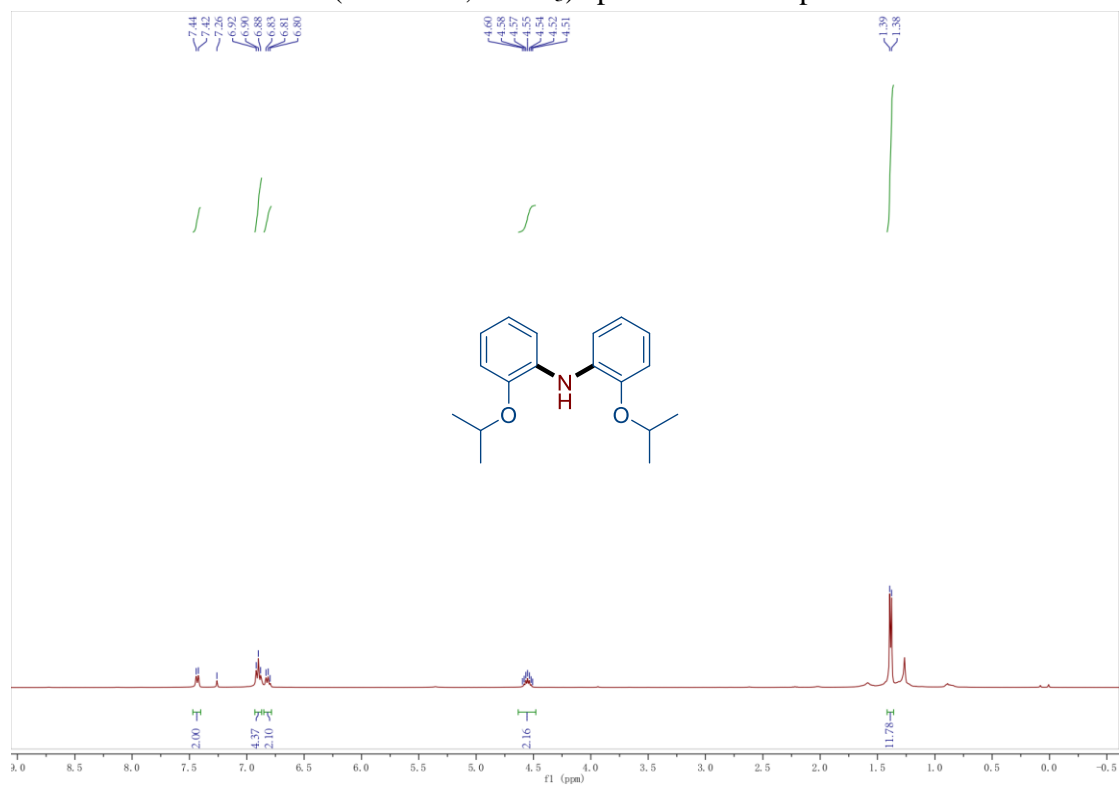

$^{13}\text{C}\{^1\text{H}\}$  NMR (100 MHz,  $\text{CDCl}_3$ ) spectrum of compound **64**

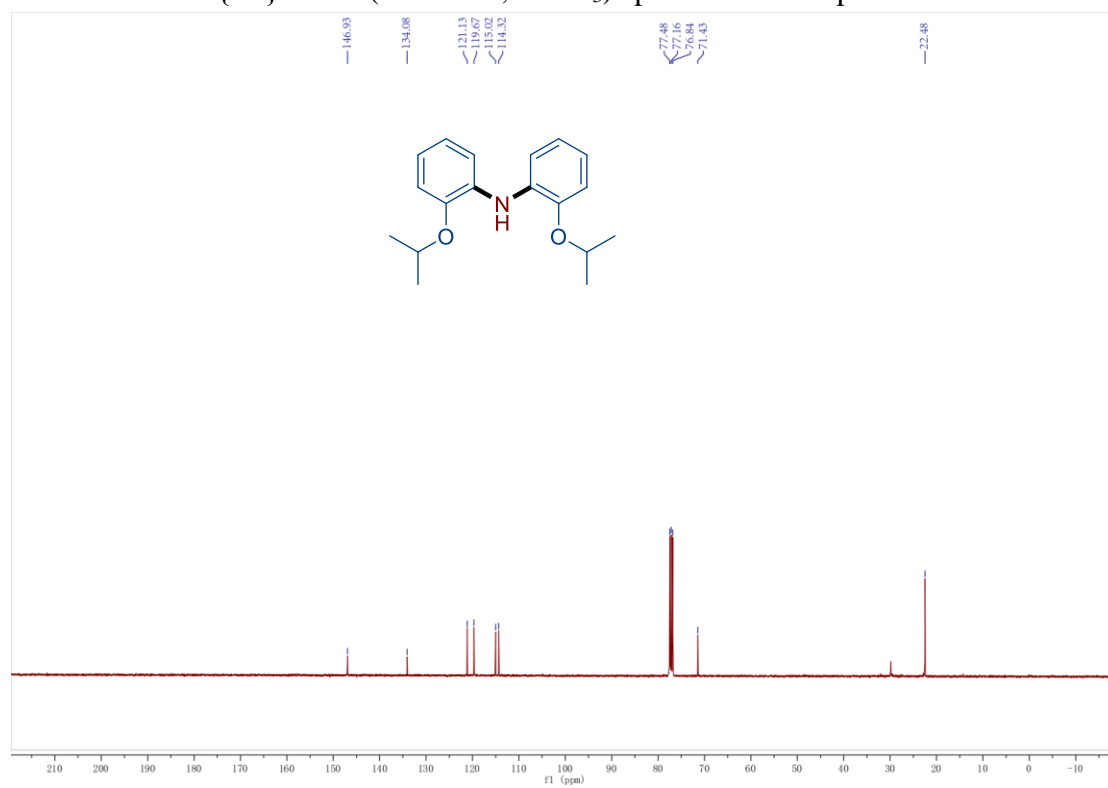



$^1\text{H}$  NMR (400 MHz,  $\text{CDCl}_3$ ) spectrum of compound **65**

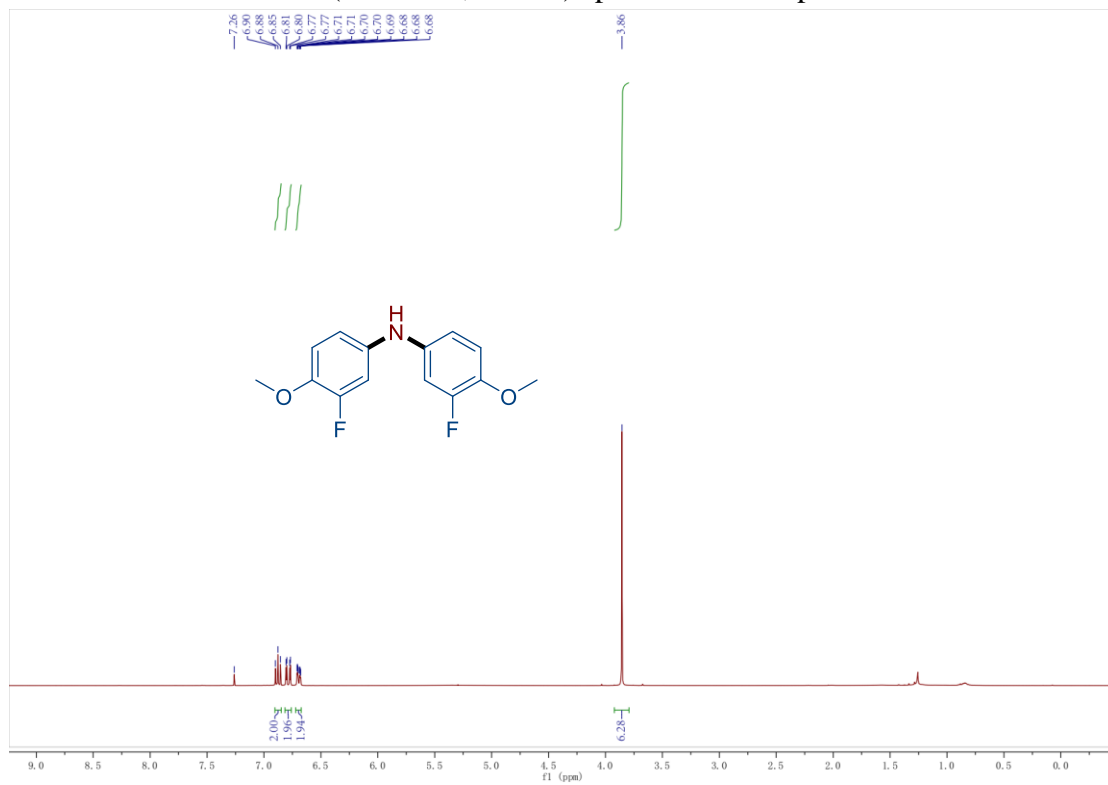

$^{13}\text{C}\{^1\text{H}\}$  NMR (100 MHz,  $\text{CDCl}_3$ ) spectrum of compound **65**

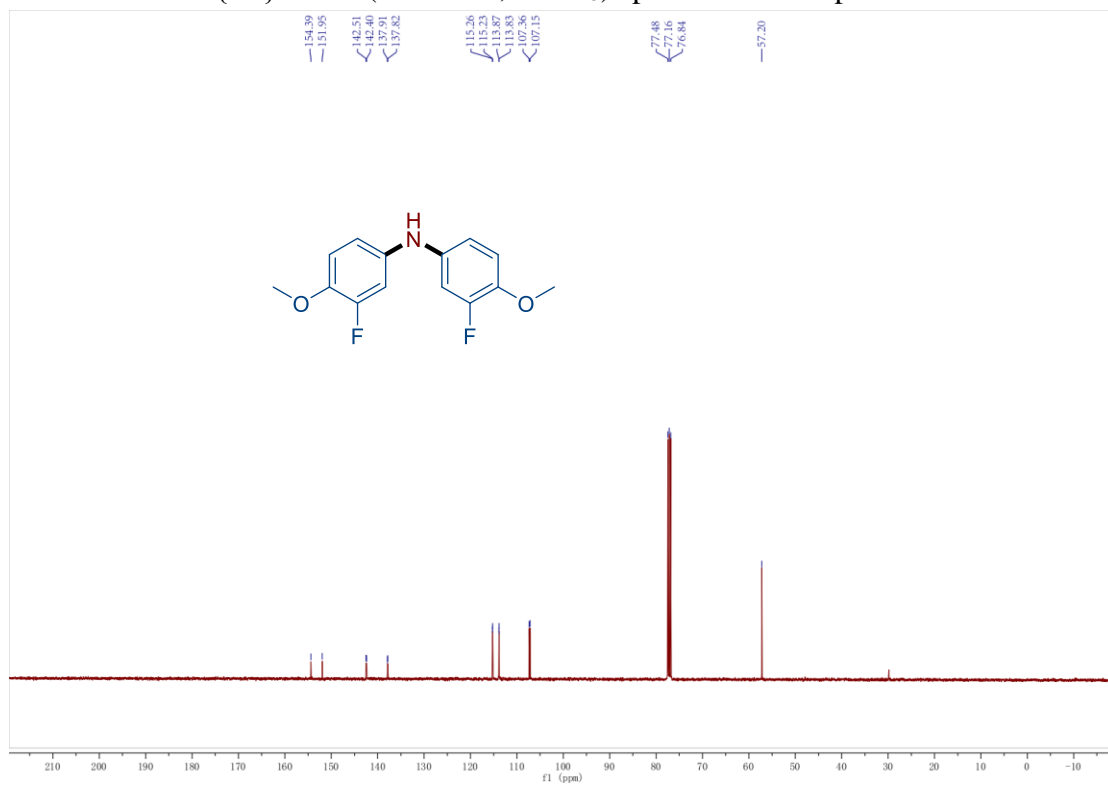

$^{19}\text{F}$  NMR (376MHz,  $\text{CDCl}_3$ ) spectrum of compound **65**

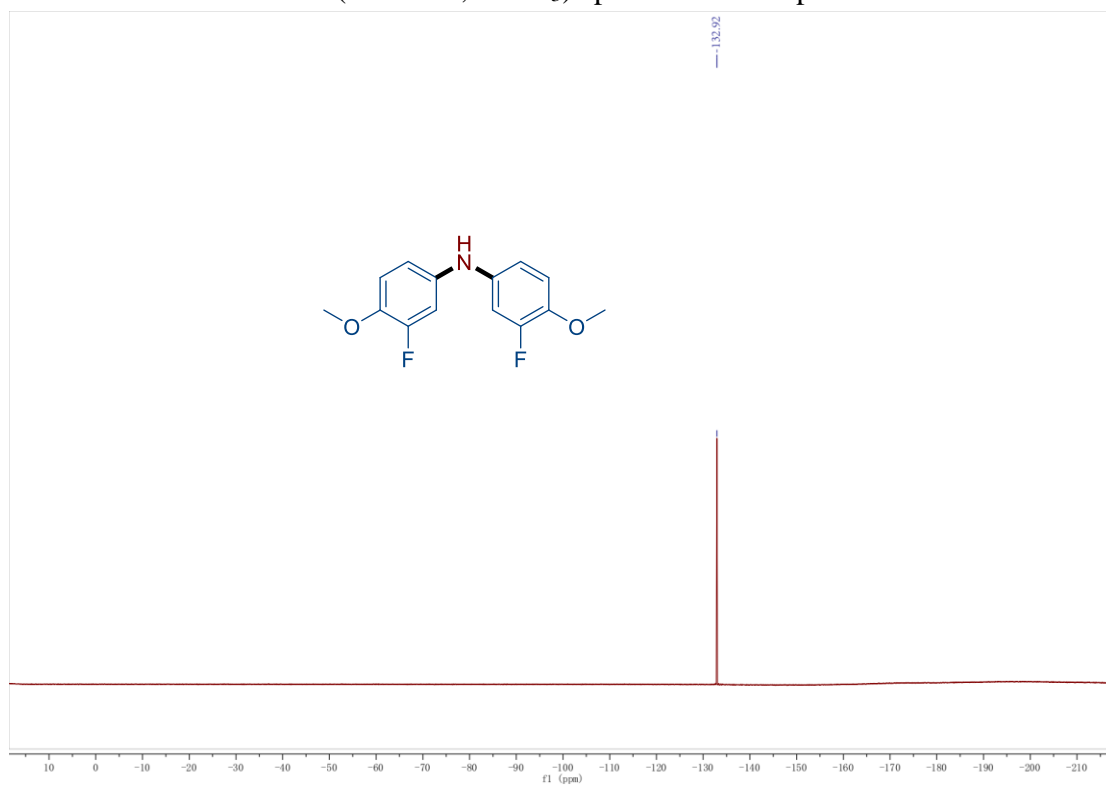

$^1\text{H}$  NMR (400 MHz,  $\text{CDCl}_3$ ) spectrum of compound **66**

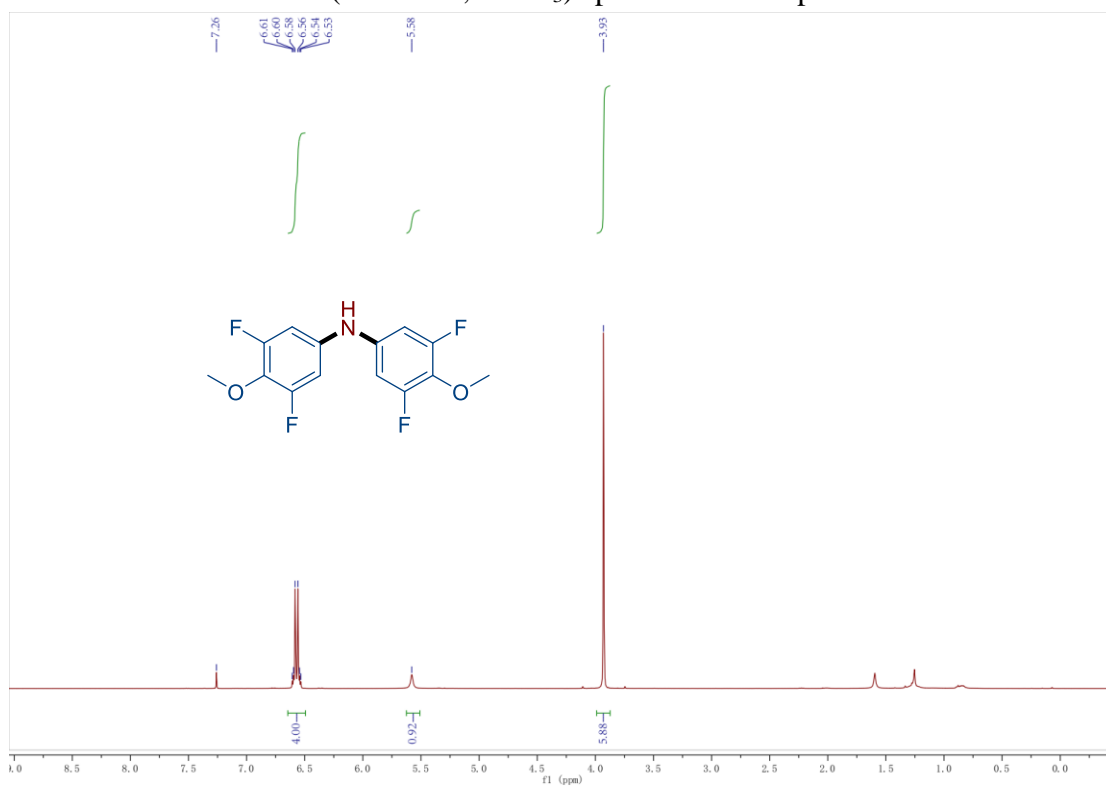

$^{13}\text{C}\{^1\text{H}\}$  NMR (100 MHz,  $\text{CDCl}_3$ ) spectrum of compound **66**

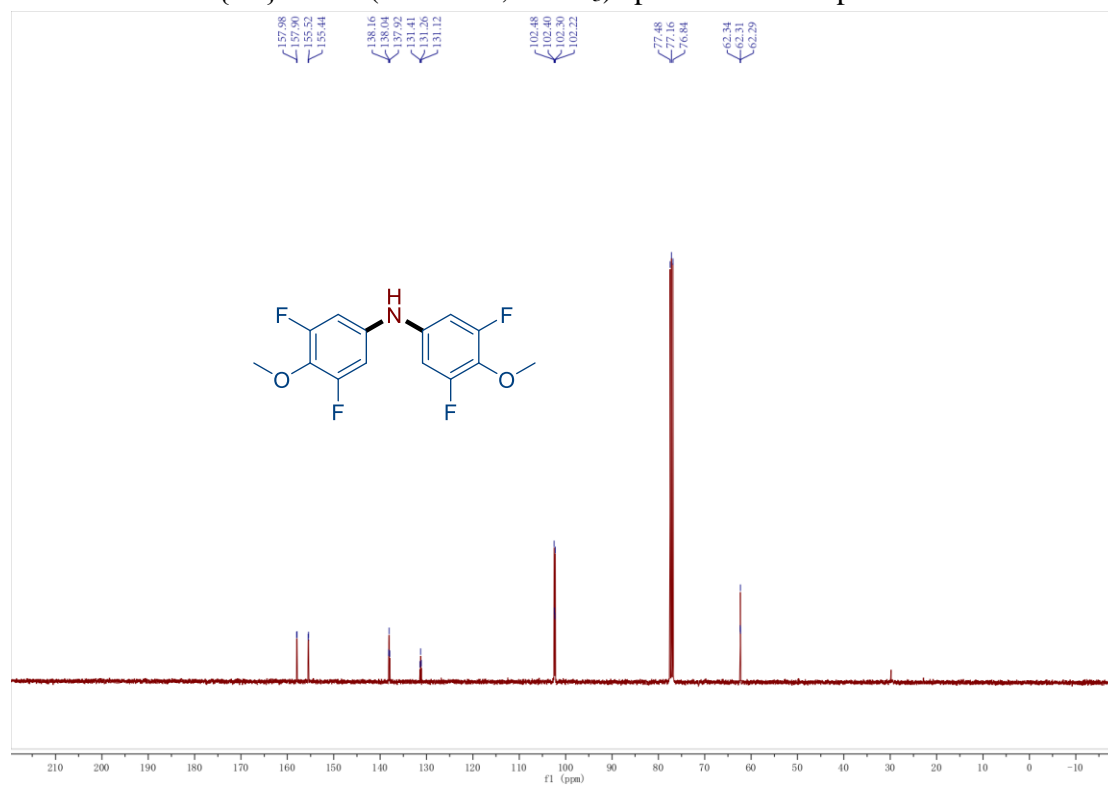

$^{19}\text{F}$  NMR (376 MHz,  $\text{CDCl}_3$ ) spectrum of compound **66**

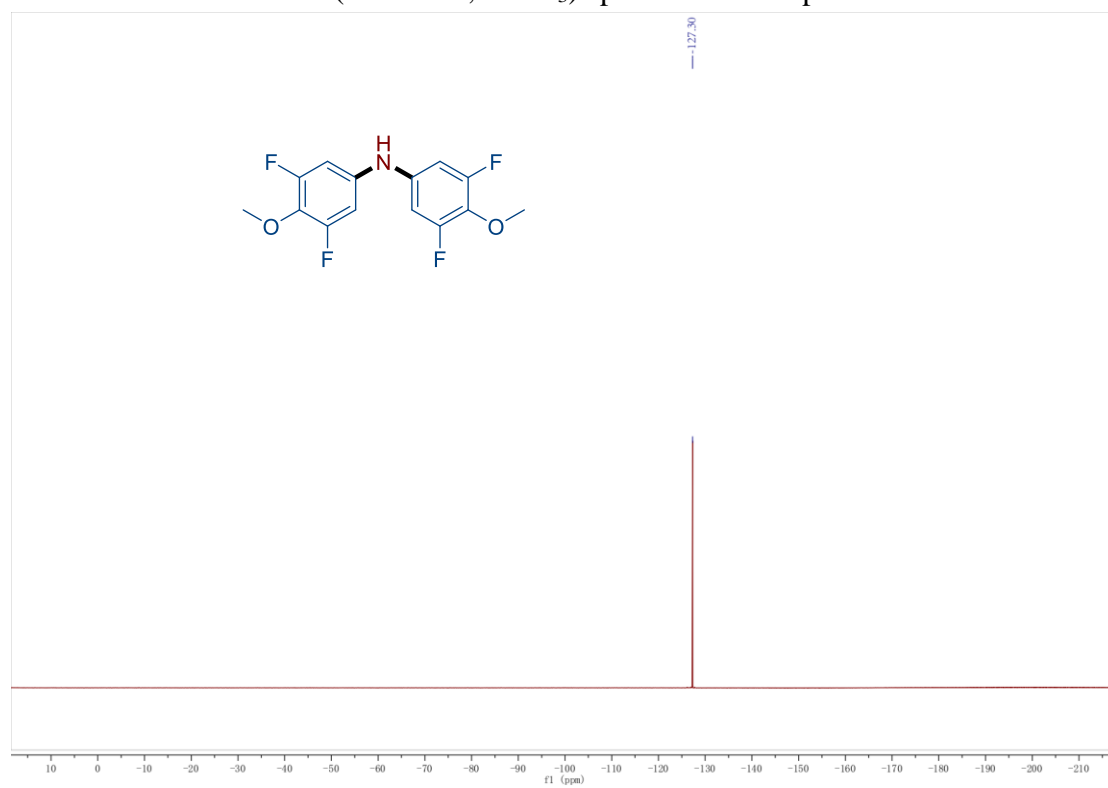

$^1\text{H}$  NMR (400 MHz,  $\text{CDCl}_3$ ) spectrum of compound **67**

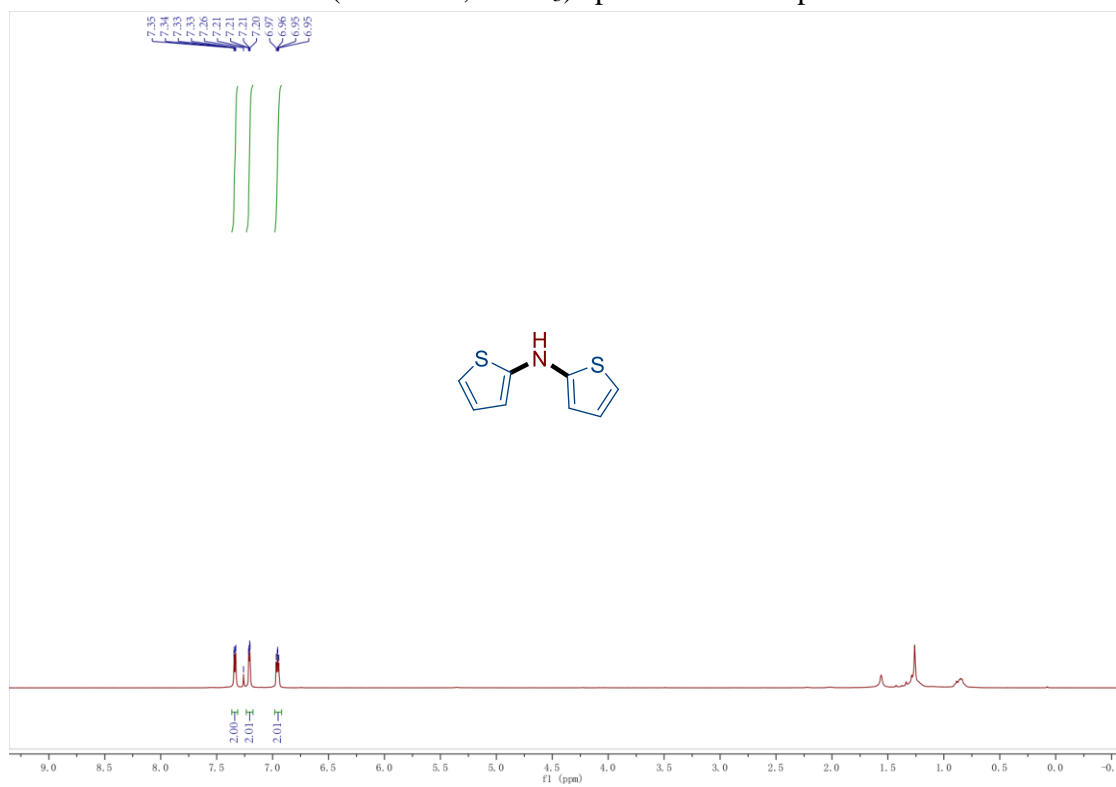

$^{13}\text{C}\{^1\text{H}\}$  NMR (100 MHz,  $\text{CDCl}_3$ ) spectrum of compound **67**

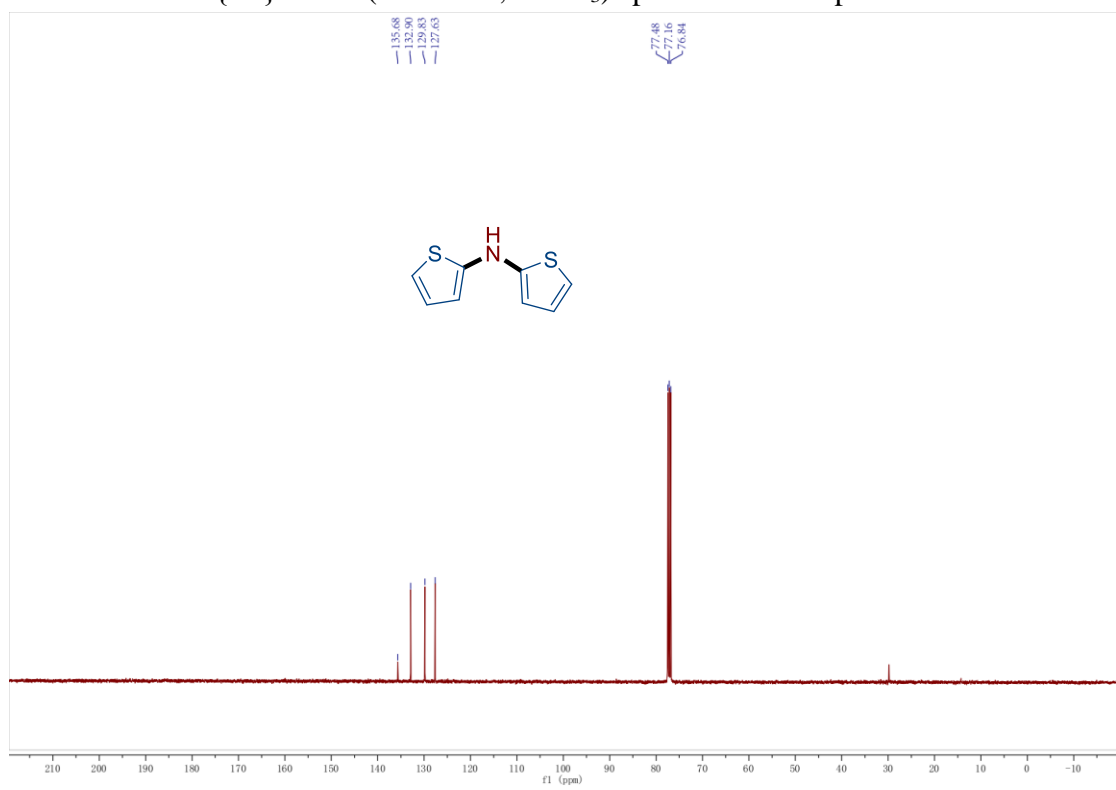

$^1\text{H}$  NMR (400 MHz,  $\text{CDCl}_3$ ) spectrum of compound **68**

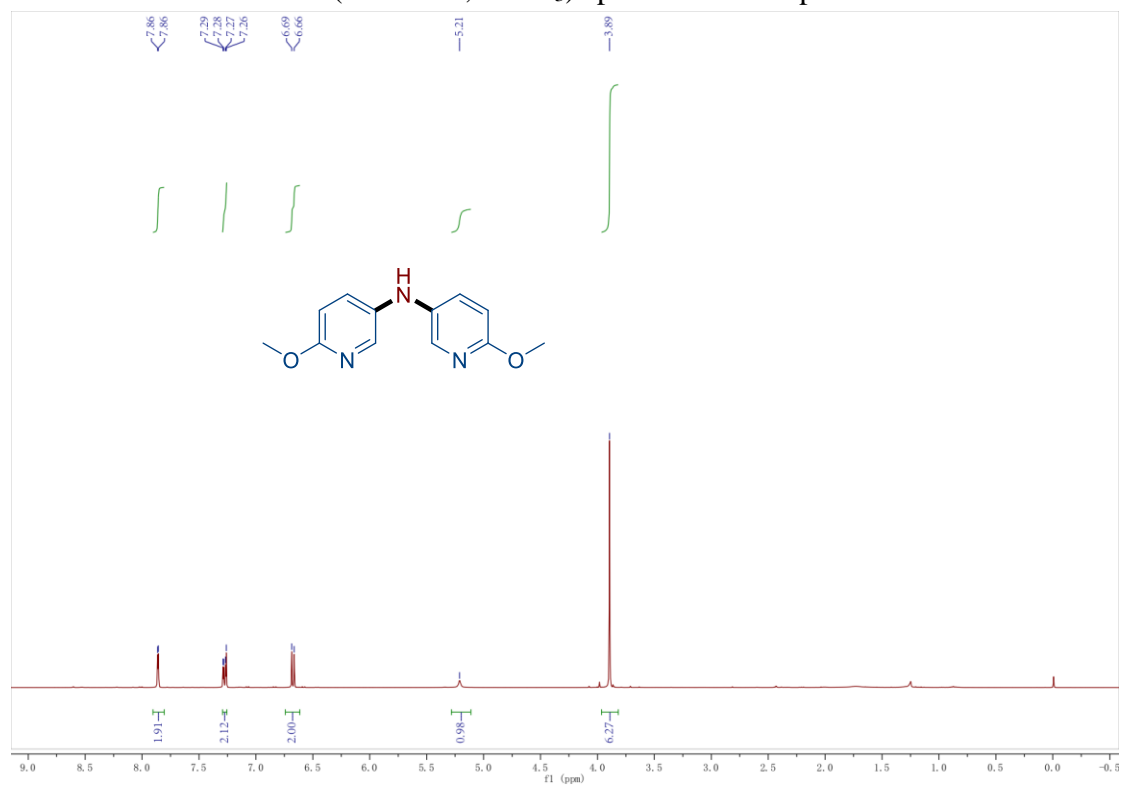

$^{13}\text{C}\{^1\text{H}\}$  NMR (100 MHz,  $\text{CDCl}_3$ ) spectrum of compound **68**

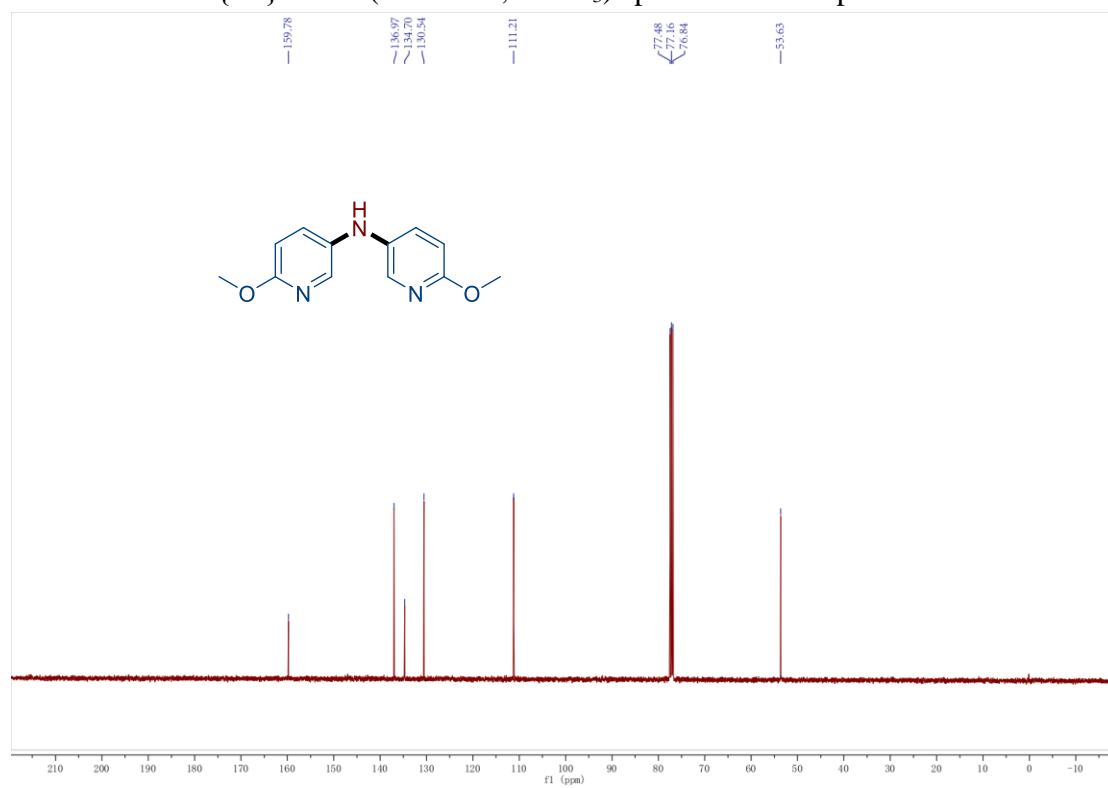

$^1\text{H}$  NMR (400 MHz,  $\text{CDCl}_3$ ) spectrum of compound **69**

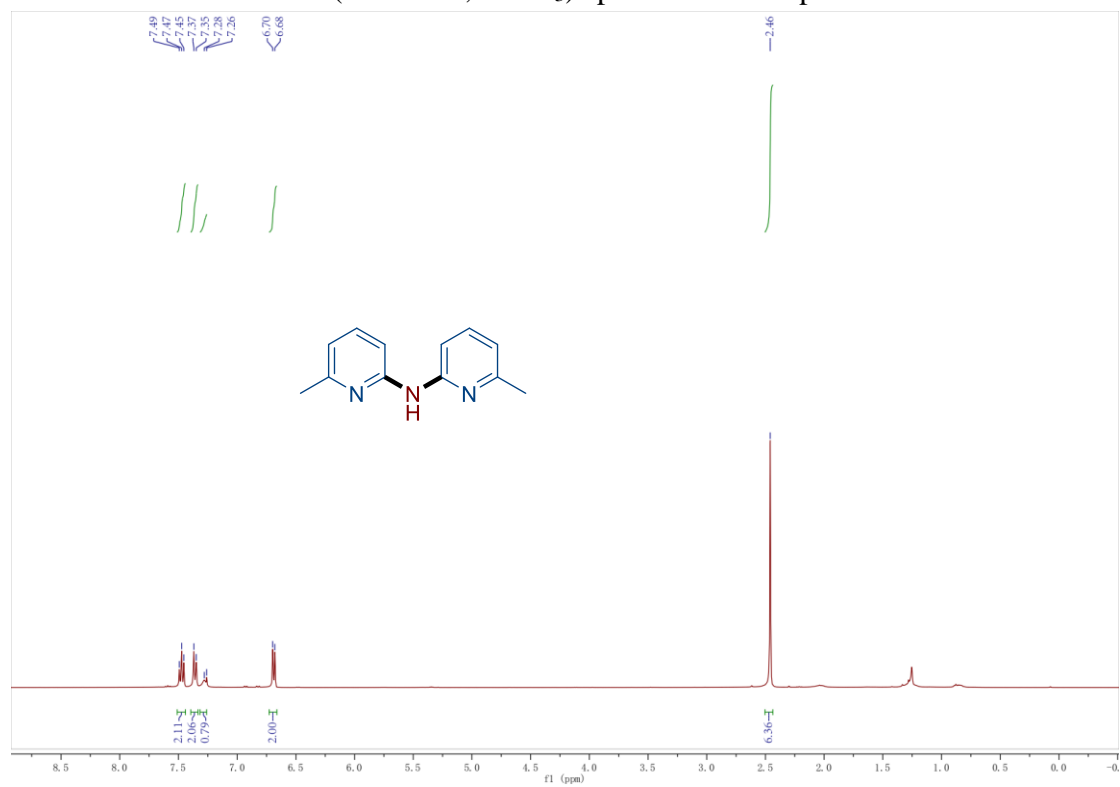

$^{13}\text{C}\{^1\text{H}\}$  NMR (100 MHz,  $\text{CDCl}_3$ ) spectrum of compound **69**

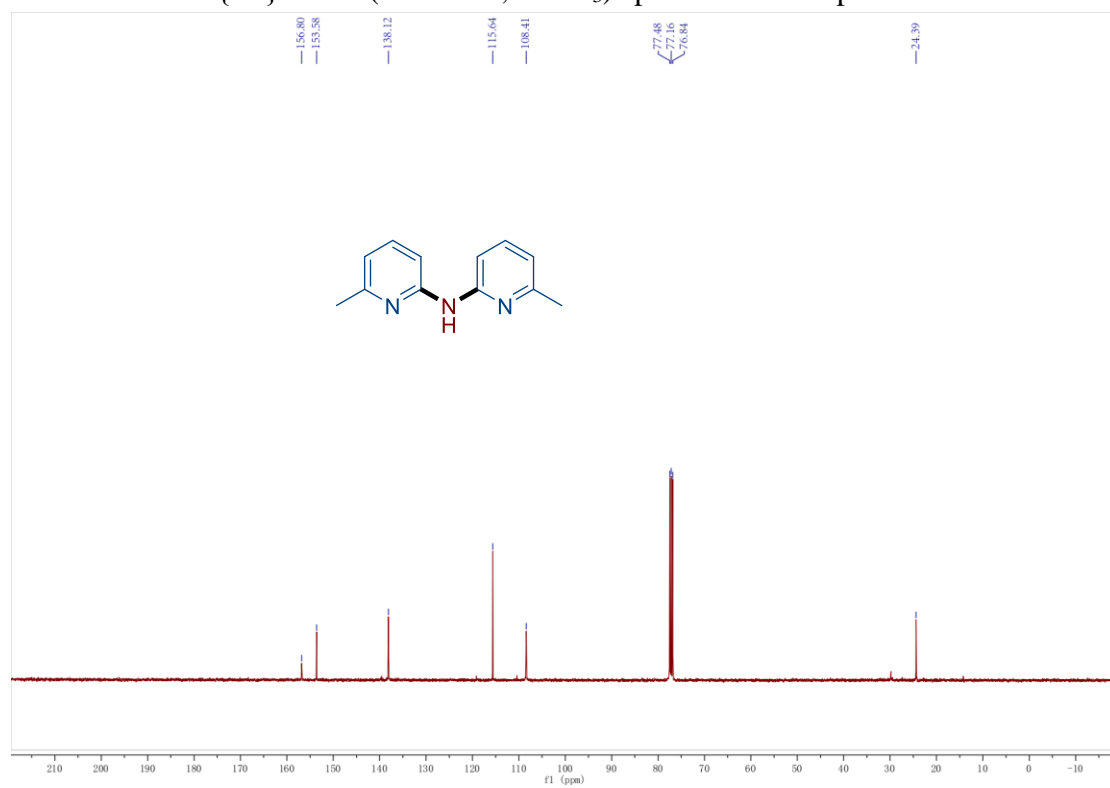

$^1\text{H}$  NMR (400 MHz,  $\text{CDCl}_3$ ) spectrum of compound **70**

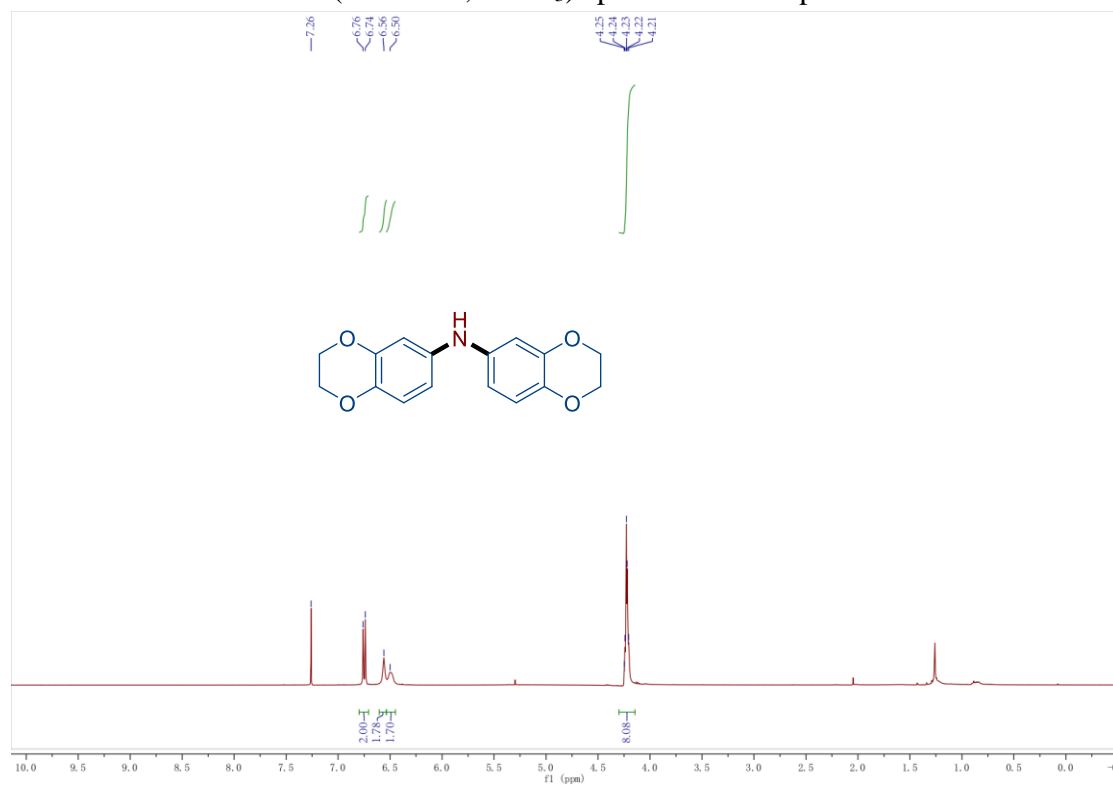

$^{13}\text{C}\{^1\text{H}\}$  NMR (100 MHz,  $\text{CDCl}_3$ ) spectrum of compound **70**

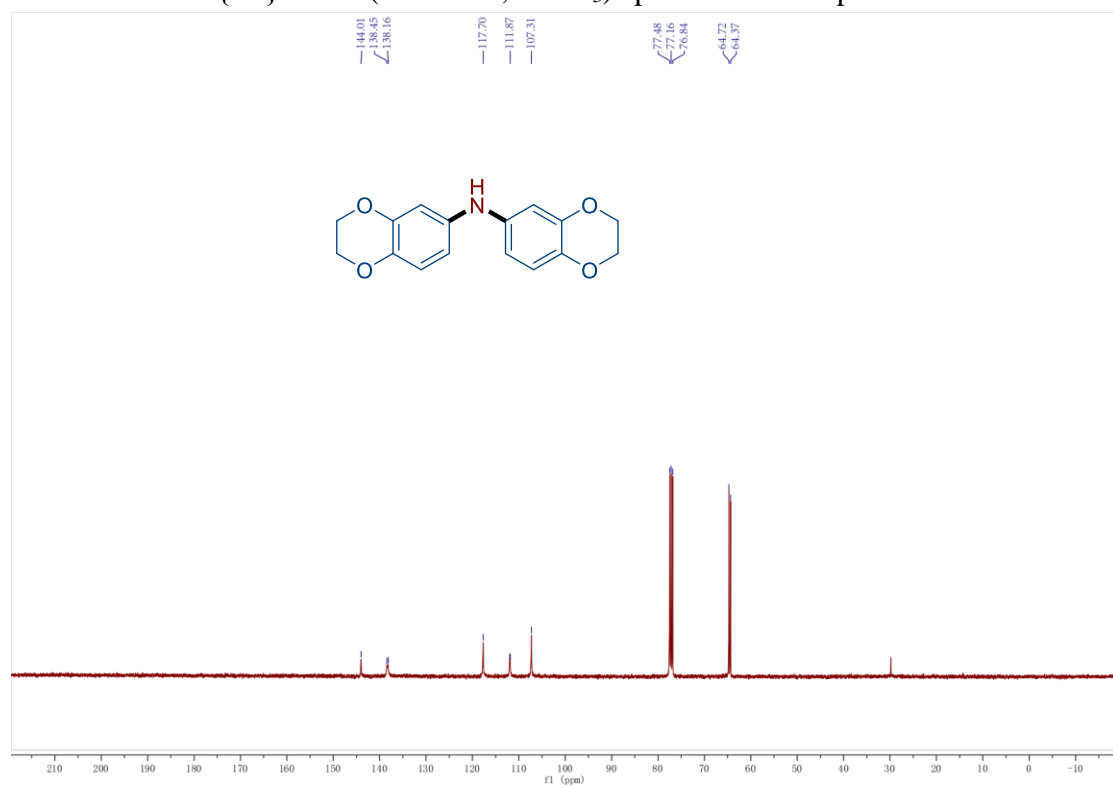

$^1\text{H}$  NMR (400 MHz,  $\text{CDCl}_3$ ) spectrum of compound **71**

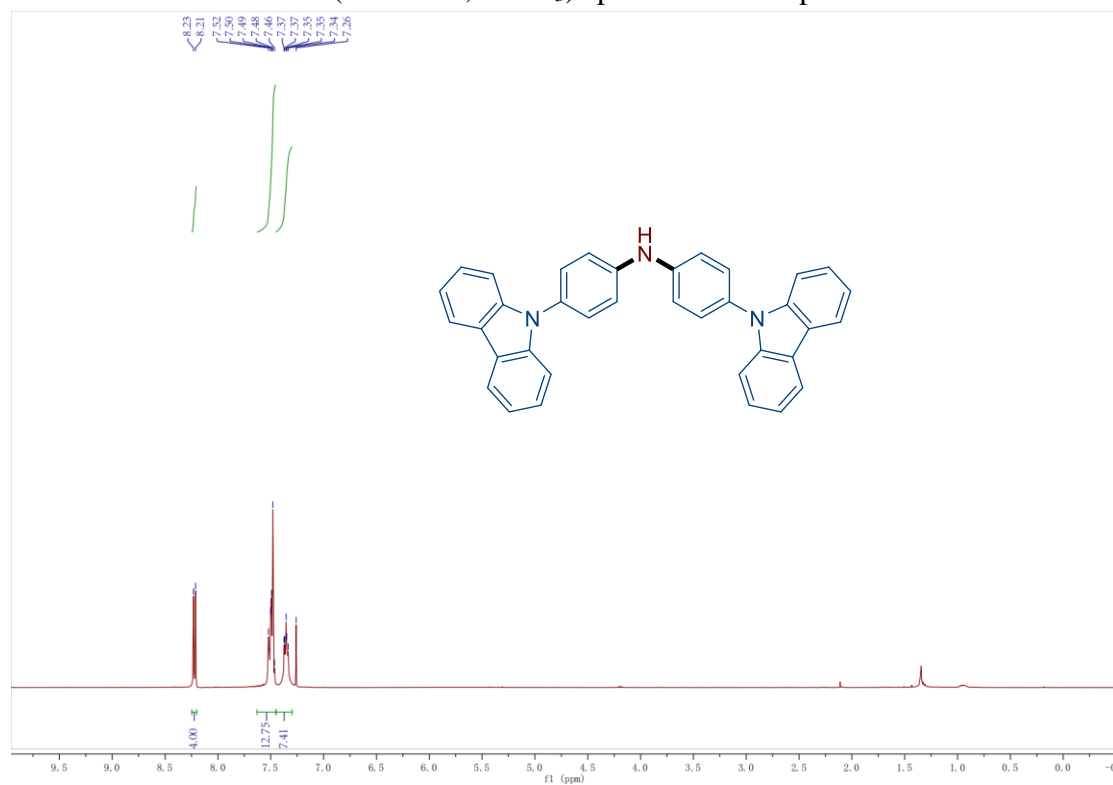

$^{13}\text{C}\{^1\text{H}\}$  NMR (100 MHz,  $\text{CDCl}_3$ ) spectrum of compound **71**

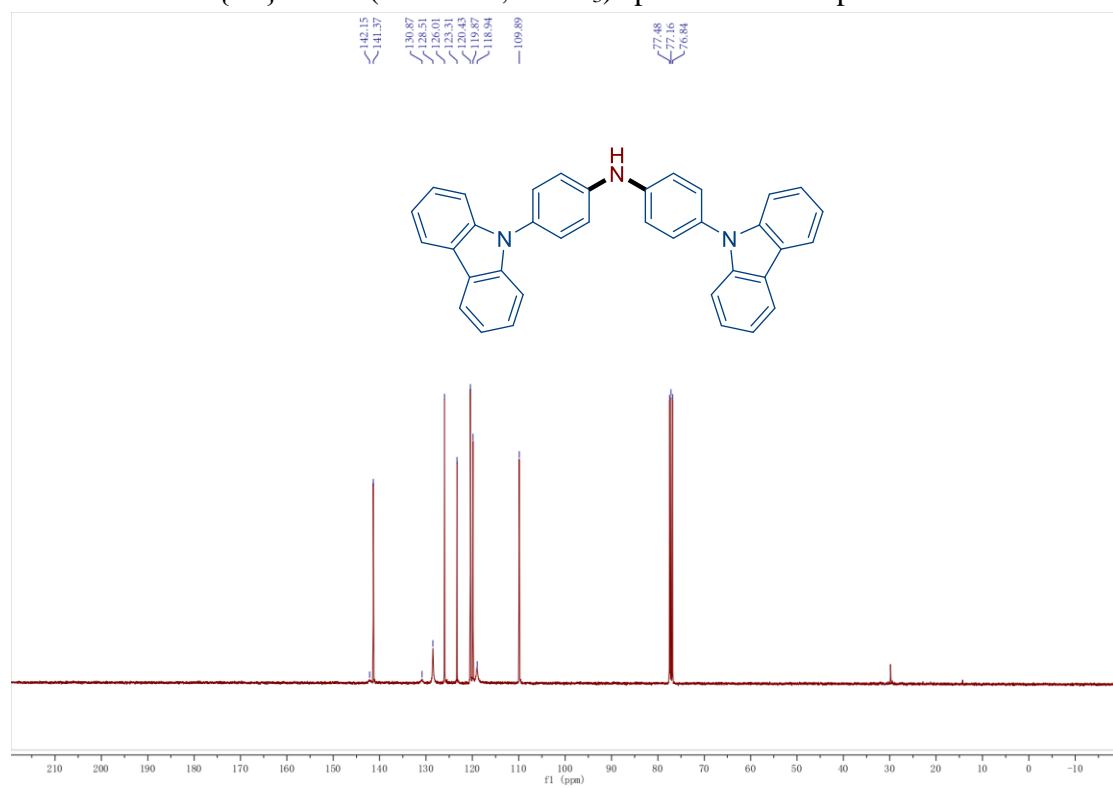



$^1\text{H}$  NMR (400 MHz,  $\text{CDCl}_3$ ) spectrum of compound **74**

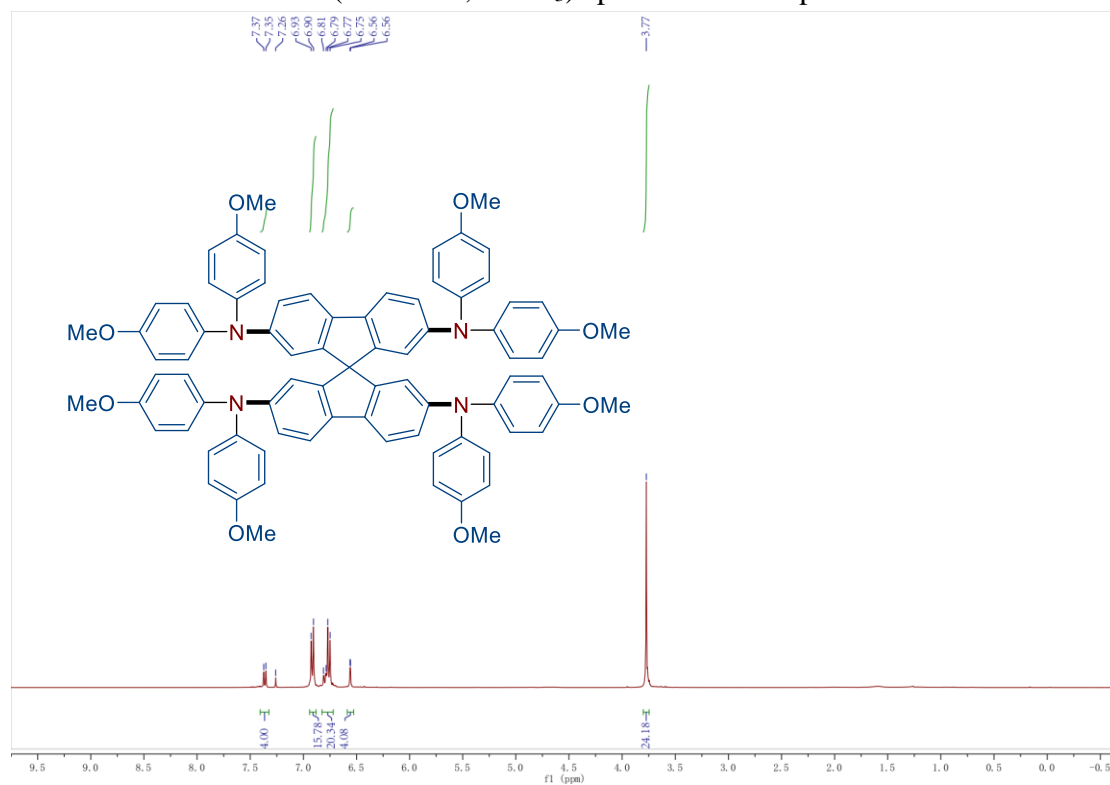

$^{13}\text{C}\{^1\text{H}\}$  NMR (100 MHz,  $\text{CDCl}_3$ ) spectrum of compound **74**

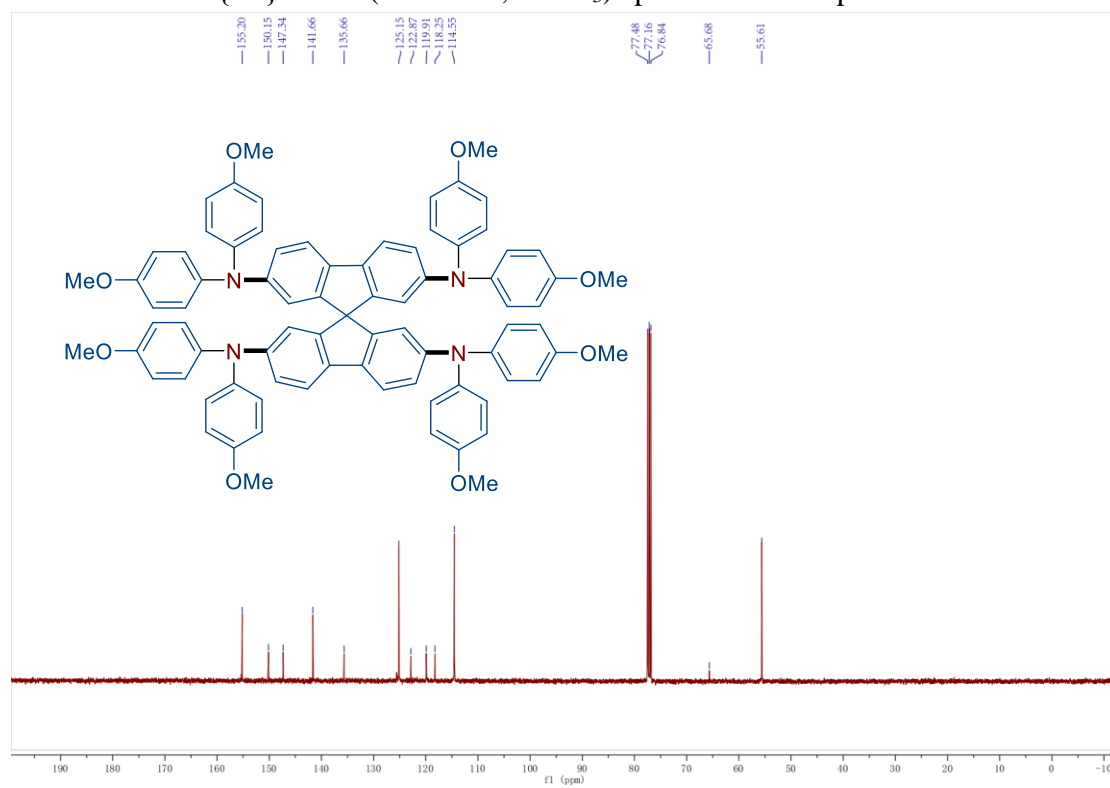

Supplement: d4qo00116h1.pdf [file d4qo00116h1.pdf]
